# Supplementary material for: The IPEA dilemma in CASPT2
Source: PubMed Central journal article supplement (PMC5452265; doi:10.1039/c6sc03759c), 2016-09-26
Supplement: SC-008-C6SC03759C-s001.pdf [file SC-008-C6SC03759C-s001.pdf]

# The IPEA Dilemma in CASPT2

J. Patrick Zobel, Juan J. Nogueira,\* and Leticia González\*

*Institute of Theoretical Chemistry, Faculty of Chemistry, University of Vienna, Währinger  
Straße 17, A-1090 Vienna, Austria*

E-mail: [nogueira.perez.juanjose@univie.ac.at](mailto:nogueira.perez.juanjose@univie.ac.at); [leticia.gonzalez@univie.ac.at](mailto:leticia.gonzalez@univie.ac.at)

## Contents

|                                                                       |            |
|-----------------------------------------------------------------------|------------|
| <b>S1 Excitation Energies from the Literature Survey</b>              | <b>S4</b>  |
| <b>S2 CASPT2/CASSCF vs. FCI Benchmark</b>                             | <b>S20</b> |
| S2.1 Computational Details . . . . .                                  | S20        |
| S2.2 Closed-Shell vs. Open-Shell Characterization . . . . .           | S21        |
| S2.3 Ground State Geometries of Di- and Triatomic Molecules . . . . . | S23        |
| S2.4 Excited State Energies of Di- and Triatomic Molecules . . . . .  | S24        |
| S2.5 The $2^1\Sigma^+$ State of NH . . . . .                          | S38        |
| S2.6 Potential Energy Curves of Diatomic Molecules . . . . .          | S38        |
| <b>S3 Thiel's Benchmark Set</b>                                       | <b>S48</b> |
| S3.1 Comments of the Benchmark Calculations of Thiel . . . . .        | S48        |
| S3.2 Ground State Energies of all Molecules . . . . .                 | S56        |
| S3.3 Additional Computational Details . . . . .                       | S57        |
| S3.4 Intruder State Problems . . . . .                                | S57        |
| S3.4.1 General Considerations . . . . .                               | S57        |

---

\*To whom correspondence should be addressed

|                                                                        |      |
|------------------------------------------------------------------------|------|
| S3.4.2 Intruder State Problems in NOIPEA-CASPT2 Calculations . . . . . | S59  |
| S3.4.3 Intruder State Problems in IPEA-CASPT2 Calculations . . . . .   | S64  |
| S3.5 CASPT2 Results for Thiel's Benchmark Set . . . . .                | S65  |
| S3.6 Basis Set Effects . . . . .                                       | S80  |
| S3.7 Comparison to other Computational Results . . . . .               | S119 |

## List of Tables

|     |                                                                                                      |      |
|-----|------------------------------------------------------------------------------------------------------|------|
| S1  | Excitation energies of organic molecules considered in the literature survey . . .                   | S5   |
| S2  | Correspondence of irreducible representations. . . . .                                               | S21  |
| S3  | Cartesian coordinates of di- and triatomic molecules. . . . .                                        | S23  |
| S4  | Energies of di- and triatomic molecules for the 6-31G basis set. . . . .                             | S26  |
| S5  | Energies of di- and triatomic molecules for the 6-311G basis set. . . . .                            | S32  |
| S6  | Potential energy curves of diatomic molecules. . . . .                                               | S38  |
| S7  | Comparison of CASPT2 excitation energies obtained by Thiel and this work. .                          | S49  |
| S8  | CASPT2 ground-state energies for molecules in the Thiel benchmark set. . . .                         | S56  |
| S9  | List of states excluded due to intruder state problems. . . . .                                      | S64  |
| S10 | CASPT2/TZVP and experimental excitation energies for Thiel's benchmark set.                          | S65  |
| S11 | NOS and $\tilde{E}^{\text{dyn}}$ for the electronic states in Thiel's benchmark set. . . . .         | S73  |
| S12 | Size of contracted basis sets for hydrogen and second-row atoms. . . . .                             | S80  |
| S13 | CASPT2/MB vertical excitation energies for Thiel's benchmark set. . . . .                            | S81  |
| S14 | CASPT2/VDZ vertical excitation energies for Thiel's benchmark set. . . . .                           | S85  |
| S15 | CASPT2/VDZP vertical excitation energies for Thiel's benchmark set. . . . .                          | S89  |
| S16 | CASPT2/VTZP vertical excitation energies for Thiel's benchmark set. . . . .                          | S93  |
| S17 | CASPT2/VQZP vertical excitation energies for Thiel's benchmark set. . . . .                          | S96  |
| S18 | CASPT2/MB dynamical correlation energies for Thiel's benchmark set. . . . .                          | S100 |
| S19 | CASPT2/VDZ dynamical correlation energies for Thiel's benchmark set. . . . .                         | S104 |
| S20 | CASPT2/VDZP dynamical correlation energies for Thiel's benchmark set. . . .                          | S108 |
| S21 | CASPT2/VTZP dynamical correlation energies for Thiel's benchmark set. . . .                          | S112 |
| S22 | CASPT2/VQZP dynamical correlation energies for Thiel's benchmark set. . . .                          | S116 |
| S23 | MSEE for different ANO-RCC basis sets and IPEA shift values for Thiel's bench-<br>mark set . . . . . | S120 |
| S24 | Excitation energies at different levels of theory for Thiel's benchmark set. . . .                   | S121 |
| S25 | MSEE and MUEE for different levels of theory for Thiel's benchmark set . . . .                       | S131 |

# Electronic Supplementary Information

This document is structured as follows. Section S1 collects all data related to the literature survey conducted in section 3 of the main manuscript and explains the procedure we followed to select the publications. In section S2, we provide additional computational details and data related to the CASSCF/CASPT2 and FCI calculations for the di- and triatomic molecules, described in section 4 of the main manuscript. And finally, section S3 presents the computational details, data, and additional discussion related to the CASPT2 calculations on the Thiel’s benchmark set, described in section 5 of the main manuscript.

## S1 Excitation Energies from the Literature Survey

The excitation energies considered in our analysis are collected in Table S1. The publications that entered our analysis were selected in the following manner. A simple search for the topic “CASPT2” in the SciFinder database generates over 2000 hits. Out of these 2000 hits, 770 refer to papers published until 2004. From those, we selected only studies concerned with the calculation of vertical excitation energies based on their title, i.e., we discarded adiabatic excitation energies or comparison of full potential energy surfaces. Further, we eliminated all studies where no experimental data was given for comparison. In case where several computational studies were provided, we included only the results obtained using the largest active space and/or basis set. Likewise, when multiple experimental values for the excitation energies were reported in the computational studies, we used the average of all of them as the reference data with one exception: since most computational studies were performed in the gas phase, we neglected experimental reference data obtained in solution if experimental reference data in gas phase was available.

For the organic molecules, we differentiated between valence and Rydberg excited states, excited states calculated in gas phase or any other environment, and excited states calculated with the standard non-diagonal CASPT2 variant<sup>1</sup> or any other CASPT2 variant.

Table S1: Calculated ( $V^{\text{calc}}$ ) and experimental ( $V^{\text{exp}}$ ) excitation energies and energy differences ( $\Delta V$ ) in eV.

| Molecule        | State     | $V^{\text{calc}}$ | $V^{\text{exp}}$ | $\Delta V$ | Character | Environment | Method   | Ref. |
|-----------------|-----------|-------------------|------------------|------------|-----------|-------------|----------|------|
| Pyridazine      | $^1A_1$   | 4.86              | 4.45             | 0.41       | valence   | gas phase   | any      | 2    |
| Pyridazine      | $^1B_2$   | 6.61              | 6.35             | 0.26       | valence   | gas phase   | any      | 2    |
| Pyridazine      | $^1B_2$   | 7.39              | 7.2              | 0.19       | valence   | gas phase   | any      | 2    |
| Pyridazine      | $^1A_1$   | 7.50              | 7.2              | 0.30       | valence   | gas phase   | any      | 2    |
| Pyridazine      | $^1B_1$   | 3.48              | 3.4              | 0.08       | valence   | gas phase   | any      | 2    |
| Pyridazine      | $^1A_2$   | 5.09              | 5.75             | -0.66      | valence   | gas phase   | any      | 2    |
| Pyridazine      | $^1B_1$   | 5.80              | 5.75             | 0.05       | valence   | gas phase   | any      | 2    |
| s-Triazine      | $^1A'_2$  | 5.33              | 5.7              | -0.37      | valence   | gas phase   | any      | 2    |
| s-Triazine      | $^1A'_1$  | 6.77              | 6.86             | -0.09      | valence   | gas phase   | any      | 2    |
| s-Triazine      | $^1E'$    | 8.16              | 7.76             | 0.40       | valence   | gas phase   | any      | 2    |
| s-Triazine      | $^1A''_2$ | 4.00              | 4.59             | -0.59      | valence   | gas phase   | any      | 2    |
| s-Triazine      | $^1E''$   | 4.24              | 3.97             | 0.27       | valence   | gas phase   | any      | 2    |
| s-Triazine      | $^1E''$   | 7.13              | 6.15             | 0.98       | valence   | gas phase   | any      | 2    |
| Cyclopentadiene | $1^1B_2$  | 5.27              | 5.26             | 0.01       | valence   | gas phase   | standard | 3    |
| Cyclopentadiene | $1^1A_2$  | 5.65              | 5.68             | -0.03      | Rydberg   | gas phase   | standard | 3    |
| Cyclopentadiene | $1^1B_1$  | 6.24              | 6.25             | -0.01      | Rydberg   | gas phase   | standard | 3    |
| Cyclopentadiene | $2^1B_2$  | 6.25              | 6.31             | -0.06      | Rydberg   | gas phase   | standard | 3    |
| Cyclopentadiene | $2^1A_2$  | 6.30              | 6.26             | 0.04       | Rydberg   | gas phase   | standard | 3    |
| Cyclopentadiene | $2^1A_1$  | 6.31              | 6.2              | 0.11       | valence   | gas phase   | standard | 3    |
| Cyclopentadiene | $3^1B_2$  | 6.86              | 6.8              | 0.06       | Rydberg   | gas phase   | standard | 3    |
| Cyclopentadiene | $3^1A_1$  | 6.93              | 7.05             | -0.12      | Rydberg   | gas phase   | standard | 3    |
| Cyclopentadiene | $4^1A_1$  | 7.89              | 7.95             | -0.06      | valence   | gas phase   | standard | 3    |
| Cyclopentadiene | $3^1B_1$  | 7.95              | 8.03             | -0.08      | Rydberg   | gas phase   | standard | 3    |
| Cyclopentadiene | $1^3B_2$  | 3.15              | 3.1              | 0.05       | valence   | gas phase   | standard | 3    |
| Cyclopentadiene | $1^3A_1$  | 4.90              | 4.7              | 0.20       | valence   | gas phase   | standard | 3    |

Table S1: . . . continued

| Molecule     | State    | $V^{\text{calc}}$ | $V^{\text{exp}}$ | $\Delta V$ | Character | Environment | Method   | Ref. |
|--------------|----------|-------------------|------------------|------------|-----------|-------------|----------|------|
| Pyrrrole     | $3^1B_1$ | 6.40              | 6.43             | -0.03      | Rydberg   | gas phase   | standard | 3    |
| Pyrrrole     | $3^1B_2$ | 6.53              | 6.5              | 0.03       | Rydberg   | gas phase   | standard | 3    |
| Pyrrrole     | $3^1A_1$ | 6.54              | 6.5              | 0.04       | Rydberg   | gas phase   | standard | 3    |
| Pyrrrole     | $4^1B_1$ | 6.62              | 6.78             | -0.16      | Rydberg   | gas phase   | standard | 3    |
| Pyrrrole     | $4^1A_1$ | 6.65              | 6.78             | -0.13      | Rydberg   | gas phase   | standard | 3    |
| Pyrrrole     | $5^1B_1$ | 7.32              | 7.26             | 0.06       | Rydberg   | gas phase   | standard | 3    |
| Pyrrrole     | $5^1A_1$ | 7.36              | 7.43             | -0.07      | Rydberg   | gas phase   | standard | 3    |
| Pyrrrole     | $6^1B_1$ | 7.39              | 7.43             | -0.04      | Rydberg   | gas phase   | standard | 3    |
| Pyrrrole     | $4^1B_2$ | 7.43              | 7.43             | 0.00       | Rydberg   | gas phase   | standard | 3    |
| Pyrrrole     | $6^1A_1$ | 7.46              | 7.54             | -0.08      | valence   | gas phase   | standard | 3    |
| Pyrrrole     | $5^1B_2$ | 7.72              | 7.4              | 0.32       | Rydberg   | gas phase   | standard | 3    |
| Pyrrrole     | $1^3B_2$ | 4.27              | 4.21             | 0.06       | valence   | gas phase   | standard | 3    |
| Pyrrrole     | $1^3A_1$ | 5.16              | 5.1              | 0.06       | valence   | gas phase   | standard | 3    |
| Furan        | $1^1A_2$ | 5.92              | 5.94             | -0.02      | Rydberg   | gas phase   | standard | 3    |
| Furan        | $1^1B_2$ | 6.04              | 6.06             | -0.02      | valence   | gas phase   | standard | 3    |
| Furan        | $1^1B_1$ | 6.46              | 6.48             | -0.02      | Rydberg   | gas phase   | standard | 3    |
| Furan        | $2^1B_2$ | 6.48              | 6.48             | 0.00       | Rydberg   | gas phase   | standard | 3    |
| Furan        | $2^1A_2$ | 6.59              | 6.61             | -0.02      | Rydberg   | gas phase   | standard | 3    |
| Furan        | $3^1A_1$ | 7.31              | 7.28             | 0.03       | Rydberg   | gas phase   | standard | 3    |
| Furan        | $3^1B_1$ | 7.21              | 7.38             | -0.17      | Rydberg   | gas phase   | standard | 3    |
| Furan        | $4^1A_1$ | 7.74              | 7.82             | -0.08      | valence   | gas phase   | standard | 3    |
| Furan        | $1^3B_2$ | 3.99              | 4.02             | -0.03      | valence   | gas phase   | standard | 3    |
| Furan        | $1^3A_1$ | 5.15              | 5.22             | -0.07      | valence   | gas phase   | standard | 3    |
| Octatetraene | $1^1B_u$ | 4.42              | 4.41             | 0.01       | valence   | gas phase   | standard | 4    |
| Octatetraene | $2^1B_u$ | 5.70              | 5.69             | 0.01       | Rydberg   | gas phase   | standard | 4    |

Table S1: . . . continued

| Molecule      | State       | $V^{\text{calc}}$ | $V^{\text{exp}}$ | $\Delta V$ | Character | Environment | Method   | Ref. |
|---------------|-------------|-------------------|------------------|------------|-----------|-------------|----------|------|
| Octatetraene  | $3^1B_u$    | 5.83              | 5.88             | -0.05      | valence   | gas phase   | standard | 4    |
| Octatetraene  | $3^1A_g$    | 6.10              | 6.04             | 0.06       | Rydberg   | gas phase   | standard | 4    |
| Octatetraene  | $1^3B_u$    | 2.17              | 2.1              | 0.07       | valence   | gas phase   | standard | 4    |
| Octatetraene  | $1^3A_g$    | 3.39              | 3.55             | -0.16      | valence   | gas phase   | standard | 4    |
| Naphthalene   | $1^1B_{3u}$ | 4.03              | 3.99             | 0.05       | valence   | gas phase   | standard | 5    |
| Naphthalene   | $1^1B_{2u}$ | 4.56              | 4.58             | -0.01      | valence   | gas phase   | standard | 5    |
| Naphthalene   | $2^1A_g$    | 5.39              | 5.51             | -0.12      | valence   | gas phase   | standard | 5    |
| Naphthalene   | $1^1B_{1g}$ | 5.53              | 5.25             | 0.28       | valence   | gas phase   | standard | 5    |
| Naphthalene   | $2^1B_{3u}$ | 5.54              | 5.69             | -0.15      | valence   | gas phase   | standard | 5    |
| Naphthalene   | $1^1A_u$    | 5.54              | 5.6              | -0.06      | Rydberg   | gas phase   | standard | 5    |
| Naphthalene   | $2^1B_{1g}$ | 5.87              | 5.8              | 0.07       | valence   | gas phase   | standard | 5    |
| Naphthalene   | $2^1B_{2u}$ | 5.93              | 6.07             | -0.14      | valence   | gas phase   | standard | 5    |
| Naphthalene   | $3^1A_g$    | 6.04              | 6.03             | 0.01       | valence   | gas phase   | standard | 5    |
| Naphthalene   | $4^1B_{2u}$ | 7.16              | 11.35            | -4.19      | valence   | gas phase   | standard | 5    |
| Pyrazine      | $1^1B_{2u}$ | 4.75              | 4.81             | -0.06      | valence   | gas phase   | standard | 6    |
| Pyrazine      | $2^1B_{2u}$ | 7.70              | 7.67             | 0.03       | valence   | gas phase   | standard | 6    |
| Pyrazine      | $1^1B_{1u}$ | 6.70              | 6.51             | 0.19       | valence   | gas phase   | standard | 6    |
| Pyrazine      | $2^1B_{1u}$ | 7.57              | 7.67             | -0.10      | valence   | gas phase   | standard | 6    |
| Pyrazine      | $1^1B_{3u}$ | 3.63              | 3.83             | -0.20      | valence   | gas phase   | standard | 6    |
| Norbornadiene | $1^1A_2$    | 5.28              | 5.24             | 0.04       | valence   | gas phase   | standard | 7    |
| Norbornadiene | $1^1B_1$    | 5.73              | 5.85             | -0.12      | Rydberg   | gas phase   | standard | 7    |
| Norbornadiene | $1^1B_2$    | 6.20              | 5.94             | 0.26       | valence   | gas phase   | standard | 7    |
| Norbornadiene | $2^1A_1$    | 6.33              | 6.37             | -0.04      | Rydberg   | gas phase   | standard | 7    |
| Norbornadiene | $2^1B_2$    | 6.48              | 6.68             | -0.20      | valence   | gas phase   | standard | 7    |
| Norbornadiene | $3^1B_2$    | 6.50              | 6.6              | -0.10      | Rydberg   | gas phase   | standard | 7    |

Table S1: . . . continued

| Molecule      | State       | $V^{\text{calc}}$ | $V^{\text{exp}}$ | $\Delta V$ | Character | Environment | Method   | Ref. |
|---------------|-------------|-------------------|------------------|------------|-----------|-------------|----------|------|
| Norbornadiene | $3^1A_1$    | 6.67              | 6.87             | -0.20      | Rydberg   | gas phase   | standard | 7    |
| Norbornadiene | $4^1A_1$    | 6.94              | 7.2              | -0.26      | Rydberg   | gas phase   | standard | 7    |
| Norbornadiene | $5^1A_2$    | 7.36              | 7.5              | -0.14      | valence   | gas phase   | standard | 7    |
| Norbornadiene | $6^1B_1$    | 7.39              | 7.65             | -0.26      | Rydberg   | gas phase   | standard | 7    |
| Norbornadiene | $7^1A_1$    | 7.74              | 7.9              | -0.16      | Rydberg   | gas phase   | standard | 7    |
| Norbornadiene | $8^1A_1$    | 7.84              | 8                | -0.16      | Rydberg   | gas phase   | standard | 7    |
| Norbornadiene | $1^3A_2$    | 3.42              | 3.44             | -0.02      | valence   | gas phase   | standard | 7    |
| Norbornadiene | $1^3B_2$    | 3.80              | 3.9              | -0.10      | valence   | gas phase   | standard | 7    |
| Benzene       | $1^1B_{2u}$ | 4.84              | 4.9              | -0.06      | valence   | gas phase   | standard | 8    |
| Benzene       | $1^1B_{1u}$ | 6.30              | 6.2              | 0.10       | valence   | gas phase   | standard | 8    |
| Benzene       | $1^1E_{1u}$ | 7.03              | 6.98             | 0.05       | valence   | gas phase   | standard | 8    |
| Benzene       | $2^1E_{2g}$ | 7.90              | 7.8              | 0.10       | valence   | gas phase   | standard | 8    |
| Benzene       | $2^1E_{1u}$ | 7.16              | 7.41             | -0.25      | Rydberg   | gas phase   | standard | 8    |
| Benzene       | $2^1A_{1g}$ | 7.74              | 7.81             | -0.07      | Rydberg   | gas phase   | standard | 8    |
| Benzene       | $1^1E_{2g}$ | 7.77              | 7.81             | -0.04      | Rydberg   | gas phase   | standard | 8    |
| Benzene       | $1^1A_{2g}$ | 7.81              | 7.81             | 0.00       | Rydberg   | gas phase   | standard | 8    |
| Benzene       | $1^1E_{1g}$ | 6.38              | 6.33             | 0.05       | Rydberg   | gas phase   | standard | 8    |
| Benzene       | $1^1A_{2u}$ | 6.86              | 6.93             | -0.07      | Rydberg   | gas phase   | standard | 8    |
| Benzene       | $1^1E_{2u}$ | 6.91              | 6.95             | -0.04      | Rydberg   | gas phase   | standard | 8    |
| Benzene       | $1^1B_{2g}$ | 7.58              | 7.46             | 0.12       | Rydberg   | gas phase   | standard | 8    |
| Benzene       | $1^1B_{1g}$ | 7.58              | 7.46             | 0.12       | Rydberg   | gas phase   | standard | 8    |
| Benzene       | $2^1E_{1g}$ | 7.57              | 7.53             | 0.04       | Rydberg   | gas phase   | standard | 8    |
| Benzene       | $1^3B_{1u}$ | 3.89              | 3.94             | -0.05      | Rydberg   | gas phase   | standard | 8    |
| Benzene       | $1^3E_{1u}$ | 4.49              | 4.76             | -0.27      | Rydberg   | gas phase   | standard | 8    |
| Benzene       | $1^eB_{2u}$ | 5.49              | 5.6              | -0.11      | Rydberg   | gas phase   | standard | 8    |

Table S1: . . . continued

| Molecule     | State           | $V^{\text{calc}}$ | $V^{\text{exp}}$ | $\Delta V$ | Character | Environment | Method   | Ref. |
|--------------|-----------------|-------------------|------------------|------------|-----------|-------------|----------|------|
| Benzene      | $1^3E_{2g}$     | 7.12              | 7.49             | -0.37      | Rydberg   | gas phase   | standard | 8    |
| Phenol       | $1^1B_{2u}$     | 4.53              | 4.51             | 0.02       | valence   | gas phase   | standard | 8    |
| Phenol       | $1^1V_{1z}$     | 5.80              | 5.77             | 0.03       | valence   | gas phase   | standard | 8    |
| Phenol       | $1^1E_{1u}$     | 6.50              | 6.66             | -0.16      | valence   | gas phase   | standard | 8    |
| Phenol       | $1^1E_{1u}$     | 6.56              | 6.66             | -0.10      | valence   | gas phase   | standard | 8    |
| Ozone        | $1^1A_2$        | 1.77              | 1.6              | 0.17       | valence   | gas phase   | standard | 9    |
| Ozone        | $1^1B_1$        | 1.87              | 2.1              | -0.23      | valence   | gas phase   | standard | 9    |
| Ozone        | $1^1B_2$        | 4.51              | 4.9              | -0.39      | valence   | gas phase   | standard | 9    |
| Formaldehyde | $1^1A_2$        | 3.91              | 3.93             | -0.02      | valence   | gas phase   | standard | 10   |
| Formaldehyde | $1^1B_2$        | 7.30              | 7.09             | 0.21       | Rydberg   | gas phase   | standard | 10   |
| Formaldehyde | $2^1B_2$        | 8.09              | 8.14             | -0.05      | Rydberg   | gas phase   | standard | 10   |
| Formaldehyde | $2^1A_1$        | 8.12              | 7.97             | 0.15       | Rydberg   | gas phase   | standard | 10   |
| Formaldehyde | $2^1A_2$        | 8.32              | 8.37             | -0.05      | Rydberg   | gas phase   | standard | 10   |
| Formaldehyde | $3^1B_2$        | 9.13              | 8.88             | 0.25       | Rydberg   | gas phase   | standard | 10   |
| Formaldehyde | $3^1A_2$        | 9.31              | 9.22             | 0.09       | Rydberg   | gas phase   | standard | 10   |
| Formaldehyde | $1^3A_2$        | 3.48              | 3.5              | -0.02      | valence   | gas phase   | standard | 10   |
| Formaldehyde | $1^3A_1$        | 5.99              | 5.82             | 0.17       | valence   | gas phase   | standard | 10   |
| $N_2$        | $3^3\Sigma_u^+$ | 5.90              | 6.22             | -0.32      | valence   | gas phase   | standard | 11   |
| $N_2$        | $3^1\Pi_g$      | 7.07              | 7.39             | -0.32      | valence   | gas phase   | standard | 11   |
| Formamide    | $1^1A''$        | 5.61              | 5.5              | 0.11       | valence   | gas phase   | any      | 12   |
| Formamide    | $2^1A'$         | 7.41              | 7.4              | 0.01       | valence   | gas phase   | any      | 12   |
| Formamide    | $1^3A''$        | 5.34              | 5.3              | 0.04       | valence   | gas phase   | any      | 12   |
| Glycine      | $1^1A''$        | 5.65              | 5.9              | -0.25      | valence   | any         | any      | 13   |
| Glycine      | $3^1A'$         | 6.98              | 6.95             | 0.03       | Rydberg   | any         | any      | 13   |
| Glycine      | $11^1A'$        | 8.10              | 8.1              | 0.00       | valence   | any         | any      | 13   |

Table S1: . . . continued

| Molecule        | State       | $V^{\text{calc}}$ | $V^{\text{exp}}$ | $\Delta V$ | Character | Environment | Method   | Ref. |
|-----------------|-------------|-------------------|------------------|------------|-----------|-------------|----------|------|
| Glycine         | $15^1A'$    | 8.86              | 8.5              | 0.36       | Rydberg   | any         | any      | 13   |
| Glycine         | $16^1A'$    | 8.99              | 8                | 0.99       | Rydberg   | any         | any      | 13   |
| Glycine         | $19^1A'$    | 10.21             | 10               | 0.21       | valence   | any         | any      | 13   |
| N-acetylglycine | $1^1A''$    | 5.25              | 5.6              | -0.35      | valence   | any         | any      | 13   |
| N-acetylglycine | $2^1A''$    | 5.63              | 5.9              | -0.27      | valence   | any         | any      | 13   |
| N-acetylglycine | $2^1A'$     | 6.70              | 6.5              | 0.20       | Rydberg   | any         | any      | 13   |
| N-acetylglycine | $3^1A'$     | 6.76              | 6.6              | 0.16       | valence   | any         | any      | 13   |
| N-acetylglycine | $7^1A'$     | 7.14              | 6.9              | 0.24       | Rydberg   | any         | any      | 13   |
| N-acetylglycine | $11^1A'$    | 8.55              | 8                | 0.55       | valence   | any         | any      | 13   |
| N-acetylglycine | $13^1A'$    | 9.51              | 9.1              | 0.41       | valence   | any         | any      | 13   |
| Imidazole       | $2^1A'$     | 6.32              | 6                | 0.32       | valence   | gas phase   | any      | 14   |
| Imidazole       | $3^1A'$     | 6.53              | 6.5              | 0.03       | valence   | gas phase   | any      | 14   |
| Indole          | $2^1A'$     | 4.43              | 4.37             | 0.06       | valence   | gas phase   | standard | 15   |
| Indole          | $3^1A'$     | 4.73              | 4.77             | -0.04      | valence   | gas phase   | standard | 15   |
| Indole          | $4^1A'$     | 5.21              | 5.27             | -0.06      | Rydberg   | gas phase   | standard | 15   |
| Indole          | $5^1A'$     | 5.65              | 5.55             | 0.10       | Rydberg   | gas phase   | standard | 15   |
| Indole          | $6^1A'$     | 5.84              | 6.02             | -0.18      | valence   | gas phase   | standard | 15   |
| Indole          | $12^1A'$    | 6.35              | 6.35             | 0.00       | valence   | gas phase   | standard | 15   |
| Biphenylene     | $1^1B_{1u}$ | 3.31              | 3.55             | -0.24      | valence   | gas phase   | any      | 16   |
| Biphenylene     | $2^1A_g$    | 4.49              | 4.59             | -0.10      | valence   | any         | any      | 16   |
| Biphenylene     | $2^1B_{1u}$ | 4.85              | 5.1              | -0.25      | valence   | gas phase   | any      | 16   |
| Biphenylene     | $3^1A_g$    | 5.30              | 5.2              | 0.10       | valence   | any         | any      | 16   |
| Biphenylene     | $2^1B_{2u}$ | 5.75              | 5.7              | 0.05       | valence   | any         | any      | 16   |
| Biphenylene     | $3^1B_{2u}$ | 6.07              | 6.2              | -0.13      | valence   | any         | any      | 16   |
| trans-Stilbene  | $1^1B_u$    | 3.77              | 3.86             | -0.08      | valence   | gas phase   | any      | 17   |

Table S1: . . . continued

| Molecule                    | State      | $V^{\text{calc}}$ | $V^{\text{exp}}$ | $\Delta V$ | Character | Environment | Method   | Ref. |
|-----------------------------|------------|-------------------|------------------|------------|-----------|-------------|----------|------|
| trans-Stilbene              | $2^1B_u$   | 4.07              | 3.86             | 0.22       | valence   | gas phase   | any      | 17   |
| trans-Stilbene              | $2^1A_g$   | 4.13              | 4.1              | 0.03       | valence   | any         | any      | 17   |
| trans-Stilbene              | $3^1A_g$   | 4.95              | 5.02             | -0.07      | valence   | any         | any      | 17   |
| trans-Stilbene              | $4^1A_g$   | 5.30              | 5.3              | 0.00       | valence   | any         | any      | 17   |
| trans-Stilbene              | $3^1B_u$   | 5.42              | 5.42             | 0.00       | valence   | any         | any      | 17   |
| trans-Stilbene              | $4^1B_u$   | 5.42              | 5.42             | 0.00       | valence   | any         | any      | 17   |
| trans-Stilbene              | $6^1B_u$   | 5.95              | 6.15             | -0.20      | valence   | gas phase   | any      | 17   |
| trans-Stilbene              | $1^3B_u$   | 2.56              | 2.17             | 0.39       | valence   | any         | any      | 17   |
| p-Aminobenzonitrile         | $\pi\pi^*$ | 4.69              | 4.7              | -0.01      | valence   | gas phase   | any      | 18   |
| p-Dimethylaminobenzonitrile | $\pi\pi^*$ | 4.38              | 4.4              | -0.02      | valence   | gas phase   | any      | 18   |
| Nitroaniline                | $\pi\pi^*$ | 3.73              | 3.84             | -0.11      | valence   | gas phase   | any      | 18   |
| Pyrimidine                  | $1^1B_1$   | 4.26              | 4.2              | 0.06       | valence   | gas phase   | standard | 18   |
| Pyrimidine                  | $1^1A_2$   | 4.59              | 4.62             | -0.03      | valence   | gas phase   | standard | 18   |
| Pyrimidine                  | $1^1B_2$   | 5.01              | 4.99             | 0.02       | valence   | gas phase   | standard | 18   |
| Pyrimidine                  | $2^1A_1$   | 6.85              | 6.7              | 0.15       | valence   | gas phase   | standard | 18   |
| Pyrimidine                  | $2^1B_2$   | 7.53              | 7.57             | -0.04      | valence   | gas phase   | standard | 18   |
| Pyrimidine                  | $3^1A_1$   | 7.56              | 7.57             | -0.01      | valence   | gas phase   | standard | 18   |
| Butadiene                   | $1^1B_u$   | 6.32              | 5.92             | 0.40       | valence   | gas phase   | standard | 18   |
| Guanine                     | $2^1A'$    | 4.73              | 4.45             | 0.28       | valence   | gas phase   | any      | 19   |
| Guanine                     | $3^1A'$    | 5.11              | 4.95             | 0.16       | valence   | gas phase   | any      | 19   |
| Guanine                     | $4^1A'$    | 5.98              | 5.75             | 0.23       | valence   | gas phase   | any      | 19   |
| Guanine                     | $5^1A'$    | 6.49              | 6.2              | 0.29       | valence   | gas phase   | any      | 19   |
| Guanine                     | $6^1A'$    | 6.59              | 6.65             | -0.06      | valence   | gas phase   | any      | 19   |
| Guanine                     | $7^1A'$    | 6.72              | 6.65             | 0.07       | valence   | gas phase   | any      | 19   |
| Guanine                     | $8^1A'$    | 6.74              | 6.65             | 0.09       | valence   | gas phase   | any      | 19   |

Table S1: . . . continued

| Molecule  | State           | $V^{\text{calc}}$ | $V^{\text{exp}}$ | $\Delta V$ | Character | Environment | Method | Ref. |
|-----------|-----------------|-------------------|------------------|------------|-----------|-------------|--------|------|
| Acetylene | $1^1\Sigma_u^-$ | 6.96              | 7.1              | -0.14      | valence   | gas phase   | any    | 20   |
| Acetylene | $1^1\Delta_u$   | 7.30              | 7.2              | 0.10       | valence   | gas phase   | any    | 20   |
| Acetylene | $1^1\Delta_u$   | 7.30              | 7.2              | 0.10       | valence   | gas phase   | any    | 20   |
| Acetylene | $1^1\Pi_u$      | 8.30              | 8.16             | 0.14       | Rydberg   | gas phase   | any    | 20   |
| Acetylene | $1^1\Pi_g$      | 8.60              | 9.01             | -0.41      | Rydberg   | gas phase   | any    | 20   |
| Acetylene | $1^1\Delta_g$   | 8.96              | 9.01             | -0.05      | Rydberg   | gas phase   | any    | 20   |
| Acetylene | $2^1\Sigma_g^+$ | 9.06              | 9.21             | -0.15      | Rydberg   | gas phase   | any    | 20   |
| Acetylene | $2^1\Pi_u$      | 9.55              | 9.24             | 0.31       | Rydberg   | gas phase   | any    | 20   |
| Acetylene | $1^1\Sigma_u^+$ | 9.50              | 9.27             | 0.23       | Rydberg   | gas phase   | any    | 20   |
| Acetylene | $2^1\Delta_u$   | 9.73              | 10               | -0.27      | Rydberg   | gas phase   | any    | 20   |
| Acetylene | $1^1\Phi_u$     | 9.93              | 9.91             | 0.02       | Rydberg   | gas phase   | any    | 20   |
| Acetylene | $3^1\Pi_u$      | 9.93              | 9.98             | -0.05      | Rydberg   | gas phase   | any    | 20   |
| Acetylene | $1^3\Sigma_u^+$ | 5.26              | 5.2              | 0.06       | valence   | gas phase   | any    | 20   |
| Acetylene | $1^3\Delta_u$   | 6.20              | 6                | 0.20       | valence   | gas phase   | any    | 20   |
| Acetylene | $1^3\Sigma_u^-$ | 6.90              | 7.1              | -0.2       | valence   | gas phase   | any    | 20   |
| Acetylene | $1^3\Pi_u$      | 8.19              | 8.03             | 0.16       | Rydberg   | gas phase   | any    | 20   |
| Acetylene | $1^3\Pi_g$      | 8.43              | 8.81             | -0.38      | Rydberg   | gas phase   | any    | 20   |
| Acetylene | $1^3\Sigma_g^+$ | 8.80              | 9.03             | -0.23      | Rydberg   | gas phase   | any    | 20   |
| Acetylene | $1^3\Delta_g$   | 8.88              | 8.96             | -0.08      | Rydberg   | gas phase   | any    | 20   |
| Acetylene | $2^3\Pi_u$      | 9.42              | 9.18             | 0.25       | Rydberg   | gas phase   | any    | 20   |
| Porphin   | $1^1B_{3u}$     | 1.63              | 1.98             | -0.35      | valence   | gas phase   | any    | 21   |
| Porphin   | $1^1B_{2u}$     | 2.11              | 2.42             | -0.31      | valence   | gas phase   | any    | 21   |
| Porphin   | $2^1B_{2u}$     | 3.08              | 3.33             | -0.25      | valence   | gas phase   | any    | 21   |
| Porphin   | $2^1B_{3u}$     | 3.12              | 3.33             | -0.21      | valence   | gas phase   | any    | 21   |
| Porphin   | $3^1B_{2u}$     | 3.42              | 3.65             | -0.23      | valence   | gas phase   | any    | 21   |

Table S1: . . . continued

| Molecule     | State       | $V^{\text{calc}}$ | $V^{\text{exp}}$ | $\Delta V$ | Character | Environment | Method   | Ref. |
|--------------|-------------|-------------------|------------------|------------|-----------|-------------|----------|------|
| Porphin      | $3^1B_{3u}$ | 3.53              | 3.65             | -0.12      | valence   | gas phase   | any      | 21   |
| Porphin      | $4^1B_{2u}$ | 3.96              | 4.25             | -0.29      | valence   | gas phase   | any      | 21   |
| Porphin      | $3^1B_{3z}$ | 4.04              | 4.25             | -0.21      | valence   | gas phase   | any      | 21   |
| Porphin      | $1^3B_{2u}$ | 1.52              | 1.58             | -0.06      | valence   | any         | any      | 21   |
| Ethene       | $1^1B_{1u}$ | 7.98              | 8                | -0.02      | valence   | gas phase   | any      | 22   |
| Ethene       | $2^1B_{1u}$ | 9.40              | 9.33             | 0.07       | valence   | gas phase   | any      | 22   |
| cis-Stilbene | $2^1B$      | 4.61              | 4.48             | 0.13       | valence   | any         | any      | 23   |
| cis-Stilbene | $3^1B$      | 5.46              | 5.54             | -0.08      | valence   | any         | any      | 23   |
| cis-Stilbene | $7^1B$      | 6.00              | 6.14             | -0.14      | valence   | any         | any      | 23   |
| s-Tetrazine  | $1^1B_{3u}$ | 1.96              | 2.25             | -0.29      | valence   | gas phase   | any      | 24   |
| s-Tetrazine  | $1^1A_u$    | 3.06              | 3.4              | -0.34      | valence   | gas phase   | any      | 24   |
| s-Tetrazine  | $2^1B_{2g}$ | 5.48              | 5.5              | -0.02      | valence   | gas phase   | any      | 24   |
| s-Tetrazine  | $2^1B_{1g}$ | 5.99              | 5.9              | 0.09       | valence   | gas phase   | any      | 24   |
| s-Tetrazine  | $2^1B_{3u}$ | 6.37              | 6.47             | -0.10      | valence   | gas phase   | any      | 24   |
| s-Tetrazine  | $1^1B_{2u}$ | 4.89              | 4.99             | -0.09      | valence   | gas phase   | any      | 24   |
| s-Tetrazine  | $3^1B_{1u}$ | 7.13              | 7.1              | 0.03       | valence   | gas phase   | any      | 24   |
| s-Tetrazine  | $5^1B_{1u}$ | 7.54              | 7.6              | -0.06      | valence   | gas phase   | any      | 24   |
| s-Tetrazine  | $4^1B_{2u}$ | 7.94              | 8.3              | -0.36      | valence   | gas phase   | any      | 24   |
| Styrene      | $2^1A'$     | 4.34              | 4.33             | 0.01       | valence   | gas phase   | any      | 25   |
| Styrene      | $3^1A'$     | 4.97              | 5.06             | -0.09      | valence   | gas phase   | any      | 25   |
| Styrene      | $5^1A'$     | 6.19              | 6.3              | -0.11      | valence   | gas phase   | any      | 25   |
| Styrene      | $1^3A'$     | 3.03              | 2.97             | 0.06       | valence   | gas phase   | any      | 25   |
| Styrene      | $2^3A'$     | 4.09              | 3.98             | 0.11       | valence   | gas phase   | any      | 25   |
| Cyclopropene | $1^1B_1$    | 6.36              | 6.45             | -0.09      | valence   | gas phase   | standard | 26   |
| Cyclopropene | $1^1B_2$    | 7.54              | 7.1              | 0.45       | valence   | gas phase   | standard | 26   |

Table S1: . . . continued

| Molecule           | State       | $V^{\text{calc}}$ | $V^{\text{exp}}$ | $\Delta V$ | Character | Environment | Method   | Ref. |
|--------------------|-------------|-------------------|------------------|------------|-----------|-------------|----------|------|
| Cyclopropene       | $3^1A_1$    | 8.20              | 8.2              | 0.00       | Rydberg   | gas phase   | standard | 26   |
| Cyclopropene       | $5^1B_2$    | 8.97              | 9                | -0.03      | Rydberg   | gas phase   | standard | 26   |
| Cyclopropene       | $1^3B_2$    | 4.18              | 4.16             | 0.02       | valence   | gas phase   | standard | 26   |
| Cyclopropene       | $1^3B_1$    | 6.05              | 6.1              | -0.05      | valence   | gas phase   | standard | 26   |
| Cyclopropene       | $2^3B_1$    | 6.81              | 6.7              | 0.11       | Rydberg   | gas phase   | standard | 26   |
| Indene             | $^1L_b$     | 4.46              | 4.4              | 0.06       | valence   | any         | any      | 27   |
| Indene             | $^1L_a$     | 5.02              | 5                | 0.02       | valence   | any         | any      | 27   |
| Indene             | $^1B_b$     | 6.14              | 5.8              | 0.34       | valence   | any         | any      | 27   |
| Indene             | $^1B_a$     | 6.36              | 5.9              | 0.46       | valence   | any         | any      | 27   |
| 1,4-Cyclohexadiene | $1^1B_{1g}$ | 5.74              | 5.8              | -0.06      | valence   | gas phase   | standard | 28   |
| 1,4-Cyclohexadiene | $1^1B_{1u}$ | 5.90              | 6.1              | -0.2       | Rydberg   | gas phase   | standard | 28   |
| 1,4-Cyclohexadiene | $1^1B_{3g}$ | 6.53              | 6.42             | 0.11       | Rydberg   | gas phase   | standard | 28   |
| 1,4-Cyclohexadiene | $2^1B_{3g}$ | 6.67              | 6.65             | 0.02       | Rydberg   | gas phase   | standard | 28   |
| 1,4-Cyclohexadiene | $1^1B_{3u}$ | 7.16              | 7.05             | 0.11       | valence   | gas phase   | standard | 28   |
| 1,4-Cyclohexadiene | $4^1B_{1u}$ | 7.22              | 7.3              | -0.08      | Rydberg   | gas phase   | standard | 28   |
| 1,4-Cyclohexadiene | $3^1B_{3u}$ | 7.49              | 7.75             | -0.26      | valence   | gas phase   | standard | 28   |
| 1,4-Cyclohexadiene | $1^3B_{3u}$ | 4.29              | 4.08             | 0.21       | valence   | gas phase   | standard | 28   |
| 1,3-Cyclohexadiene | $1^1B$      | 4.72              | 4.94             | -0.22      | valence   | gas phase   | any      | 28   |
| 1,3-Cyclohexadiene | $2^1A$      | 5.49              | 5.39             | 0.10       | Rydberg   | gas phase   | any      | 28   |
| 1,3-Cyclohexadiene | $2^1B$      | 5.98              | 6.03             | -0.05      | Rydberg   | gas phase   | any      | 28   |
| 1,3-Cyclohexadiene | $3^1A$      | 6.12              | 6.05             | 0.07       | Rydberg   | gas phase   | any      | 28   |
| 1,3-Cyclohexadiene | $4^1A$      | 6.18              | 6.3              | -0.12      | valence   | any         | any      | 28   |
| 1,3-Cyclohexadiene | $5^1A$      | 6.64              | 6.68             | -0.04      | Rydberg   | gas phase   | any      | 28   |
| 1,3-Cyclohexadiene | $6^1A$      | 6.75              | 6.87             | -0.12      | Rydberg   | gas phase   | any      | 28   |
| 1,3-Cyclohexadiene | $6^1B$      | 7.72              | 7.7              | 0.02       | Rydberg   | gas phase   | any      | 28   |

Table S1: . . . continued

| Molecule           | State    | $V^{\text{calc}}$ | $V^{\text{exp}}$ | $\Delta V$ | Character | Environment | Method   | Ref. |
|--------------------|----------|-------------------|------------------|------------|-----------|-------------|----------|------|
| 1,3-Cyclohexadiene | $8^1A$   | 7.77              | 7.75             | 0.02       | valence   | gas phase   | any      | 28   |
| 1,3-Cyclohexadiene | $7^1B$   | 9.27              | 9                | 0.27       | valence   | gas phase   | any      | 28   |
| 1,3-Cyclohexadiene | $1^3B$   | 2.91              | 2.94             | -0.03      | valence   | gas phase   | any      | 28   |
| 1,3-Cyclohexadiene | $1^3A$   | 4.79              | 4.5              | 0.29       | valence   | gas phase   | any      | 28   |
| Pyridine           | $1^1B_1$ | 4.93              | 4.74             | 0.19       | valence   | gas phase   | standard | 29   |
| Pyridine           | $1^1A_2$ | 5.25              | 5.43             | -0.18      | valence   | gas phase   | standard | 29   |
| Pyridine           | $1^1B_2$ | 4.88              | 4.99             | -0.11      | valence   | gas phase   | standard | 29   |
| Pyridine           | $3^1A_1$ | 4.06              | 4.1              | -0.04      | valence   | gas phase   | standard | 29   |
| Pyridine           | $3^1A_1$ | 4.77              | 4.84             | -0.07      | valence   | gas phase   | standard | 29   |
| Pyridine           | $3^1A_2$ | 5.22              | 5.43             | -0.21      | valence   | gas phase   | standard | 29   |
| Pyridine           | $3^1B_2$ | 4.52              | 4.84             | -0.32      | valence   | gas phase   | standard | 29   |
| Nitrobenzene       | $1^1A_2$ | 3.57              | 3.65             | -0.08      | valence   | gas phase   | standard | 30   |
| Nitrobenzene       | $1^1B_1$ | 4.14              | 3.65             | 0.49       | valence   | gas phase   | standard | 30   |
| Nitrobenzene       | $1^1B_2$ | 4.40              | 4.38             | 0.02       | valence   | gas phase   | standard | 30   |
| Nitrobenzene       | $2^1A_1$ | 4.99              | 5.17             | -0.18      | valence   | gas phase   | standard | 30   |
| Nitrobenzene       | $3^1A_1$ | 6.20              | 6.14             | 0.06       | valence   | gas phase   | standard | 30   |
| Nitrobenzene       | $3^1B_2$ | 6.34              | 6.42             | -0.08      | valence   | gas phase   | standard | 30   |
| Nitrobenzene       | $6^1A_1$ | 6.95              | 7.56             | -0.61      | valence   | gas phase   | standard | 30   |
| Nitrobenzene       | $3^1A_2$ | 6.96              | 7.56             | -0.60      | valence   | gas phase   | standard | 30   |
| Nitrobenzene       | $7^1B_2$ | 7.46              | 7.56             | -0.10      | valence   | gas phase   | standard | 30   |
| Nitrobenzene       | $7^1A_1$ | 7.52              | 7.56             | -0.04      | valence   | gas phase   | standard | 30   |
| Nitrobenzene       | $8^1B_2$ | 7.74              | 7.56             | 0.18       | valence   | gas phase   | standard | 30   |
| Indene             | $1^3A'$  | 3.17              | 3.1              | 0.07       | valence   | any         | any      | 31   |
| Benzimidazole      | $2^1A'$  | 4.56              | 4.5              | 0.06       | valence   | any         | any      | 31   |
| Benzimidazole      | $3^1A'$  | 4.99              | 5                | -0.01      | valence   | any         | any      | 31   |

Table S1: . . . continued

| Molecule           | State      | $V^{\text{calc}}$ | $V^{\text{exp}}$ | $\Delta V$ | Character | Environment | Method | Ref. |
|--------------------|------------|-------------------|------------------|------------|-----------|-------------|--------|------|
| Benzimidazole      | $4^1A'$    | 6.29              | 6.1              | 0.19       | valence   | any         | any    | 31   |
| 7-azaindole        | $2^1A'$    | 4.22              | 4.29             | -0.07      | valence   | gas phase   | any    | 31   |
| 7-azaindole        | $3^3A'$    | 4.49              | 4.49             | 0.00       | valence   | any         | any    | 31   |
| 7-azaindole        | $4^1A'$    | 5.77              | 5.76             | 0.01       | valence   | any         | any    | 31   |
| 7-azaindole        | $5^1A'$    | 5.93              | 5.99             | -0.06      | valence   | any         | any    | 31   |
| Benzaldehyde       | $1^1A''$   | 3.71              | 3.34             | 0.37       | valence   | gas phase   | any    | 32   |
| Benzaldehyde       | $2^1A'$    | 4.33              | 4.51             | -0.18      | Rydberg   | gas phase   | any    | 32   |
| Benzaldehyde       | $3^1A'$    | 4.89              | 5.25             | -0.36      | Rydberg   | gas phase   | any    | 32   |
| Benzaldehyde       | $5^1A'$    | 6.23              | 6.36             | -0.13      | Rydberg   | gas phase   | any    | 32   |
| Benzaldehyde       | $1^3A''$   | 3.40              | 3.12             | 0.28       | valence   | gas phase   | any    | 32   |
| Benzaldehyde       | $1^3A'$    | 3.49              | 3.3              | 0.19       | valence   | gas phase   | any    | 32   |
| Pyrrrole           | $1^1A_2$   | 5.22              | 5.22             | 0.00       | valence   | gas phase   | any    | 33   |
| Pyrrrole           | $1^1B_2$   | 5.87              | 5.86             | 0.01       | valence   | gas phase   | any    | 33   |
| Pyrrrole           | $1^1B_1$   | 5.86              | 5.88             | -0.02      | valence   | gas phase   | any    | 33   |
| Pyrrrole           | $2^1B_2$   | 5.70              | 5.98             | -0.28      | valence   | gas phase   | any    | 33   |
| Cyclopropenon      | $2^1A_1$   | 4.25              | 4.13             | 0.12       | valence   | gas phase   | any    | 34   |
| Cyclopropenon      | $3^1A_1$   | 5.59              | 5.5              | 0.09       | valence   | gas phase   | any    | 34   |
| Cyclopropenon      | $2^1A_2$   | 5.96              | 6.1              | -0.14      | valence   | gas phase   | any    | 34   |
| Cyclopropenon      | $3^1B_1$   | 7.80              | 8                | -0.20      | valence   | gas phase   | any    | 34   |
| Cycloheptatrienone | $n\pi^*$   | 3.94              | 4.13             | -0.19      | valence   | any         | any    | 34   |
| Cycloheptatrienone | $\pi\pi^*$ | 4.22              | 4.13             | 0.09       | valence   | any         | any    | 34   |
| Cycloheptatrienone | $\pi\pi^*$ | 5.67              | 5.56             | 0.11       | valence   | gas phase   | any    | 34   |
| Cycloheptatrienone | $\pi\pi^*$ | 7.05              | 6.9              | 0.15       | valence   | gas phase   | any    | 34   |
| Cycloheptatrienone | $\pi\pi^*$ | 7.16              | 6.9              | 0.26       | valence   | gas phase   | any    | 34   |
| Cycloheptatrienone | $\pi\pi^*$ | 7.36              | 7.2              | 0.16       | valence   | gas phase   | any    | 34   |

Table S1: . . . continued

| Molecule              | State       | $V^{\text{calc}}$ | $V^{\text{exp}}$ | $\Delta V$ | Character | Environment | Method | Ref. |
|-----------------------|-------------|-------------------|------------------|------------|-----------|-------------|--------|------|
| Cycloheptatrienthione | $n\pi^*$    | 2.05              | 1.82             | 0.23       | valence   | gas phase   | any    | 34   |
| Cycloheptatrienthione | $n\pi^*$    | 2.10              | 2.03             | 0.07       | valence   | gas phase   | any    | 34   |
| Cycloheptatrienthione | $\pi\pi^*$  | 2.31              | 2.03             | 0.28       | valence   | any         | any    | 34   |
| Cycloheptatrienthione | $\pi\pi^*$  | 3.21              | 3.34             | -0.13      | valence   | any         | any    | 34   |
| Cycloheptatrienthione | $\pi\pi^*$  | 4.74              | 4.9              | -0.16      | valence   | any         | any    | 34   |
| Cycloheptatrienthione | $\pi\pi^*$  | 4.80              | 4.9              | -0.10      | valence   | any         | any    | 34   |
| Cycloheptatrienthione | $\pi\pi^*$  | 5.19              | 5.53             | -0.34      | valence   | any         | any    | 34   |
| Cycloheptatrienthione | $\pi\pi^*$  | 5.22              | 5.53             | -0.31      | valence   | any         | any    | 34   |
| Cycloheptatrienthione | $\pi\pi^*$  | 5.87              | 5.53             | 0.34       | valence   | any         | any    | 34   |
| p-Benzoquinone        | $1^1B_{1g}$ | 2.39              | 2.49             | -0.10      | valence   | gas phase   | any    | 35   |
| p-Benzoquinone        | $1^1A_u$    | 2.43              | 2.48             | -0.05      | valence   | gas phase   | any    | 35   |
| p-Benzoquinone        | $1^1B_{3g}$ | 4.01              | 4.07             | -0.06      | valence   | gas phase   | any    | 35   |
| p-Benzoquinone        | $1^1B_{1u}$ | 5.09              | 5.12             | -0.03      | valence   | gas phase   | any    | 35   |
| p-Benzoquinone        | $1^1B_{2u}$ | 6.83              | 7.01             | -0.18      | Rydberg   | any         | any    | 35   |
| p-Benzoquinone        | $4^1B_{1u}$ | 7.18              | 7.1              | 0.08       | valence   | gas phase   | any    | 35   |
| p-Benzoquinone        | $3^1B_{2u}$ | 7.53              | 7.5              | 0.03       | Rydberg   | any         | any    | 35   |
| p-Benzoquinone        | $3^1B_{3u}$ | 7.76              | 7.8              | -0.04      | Rydberg   | any         | any    | 35   |
| p-Benzoquinone        | $5^1B_{1u}$ | 7.81              | 7.8              | 0.01       | Rydberg   | any         | any    | 35   |
| p-Benzoquinone        | $5^1B_{2u}$ | 8.02              | 7.8              | 0.22       | Rydberg   | any         | any    | 35   |
| p-Benzoquinone        | $1^3B_{1g}$ | 2.16              | 2.3              | -0.14      | valence   | gas phase   | any    | 35   |
| p-Benzoquinone        | $1^3A_u$    | 2.22              | 2.33             | -0.11      | valence   | gas phase   | any    | 35   |
| p-Benzoquinone        | $1^3B_{1u}$ | 2.57              | 2.84             | -0.27      | valence   | any         | any    | 35   |
| p-Benzoquinone        | $1^3B_{3g}$ | 3.09              | 3                | 0.09       | valence   | any         | any    | 35   |
| p-Benzoquinone        | $2^3B_{1u}$ | 4.35              | 4.37             | -0.02      | valence   | any         | any    | 35   |
| Maleimide             | $1^1A_2$    | 3.29              | 3.33             | -0.04      | valence   | any         | any    | 36   |

Table S1: . . . continued

| Molecule         | State    | $V^{\text{calc}}$ | $V^{\text{exp}}$ | $\Delta V$ | Character | Environment | Method   | Ref. |
|------------------|----------|-------------------|------------------|------------|-----------|-------------|----------|------|
| Maleimide        | $1^1B_2$ | 4.44              | 4.46             | -0.02      | valence   | any         | any      | 36   |
| Maleimide        | $2^1B_2$ | 5.59              | 5.72             | -0.13      | valence   | any         | any      | 36   |
| 1H-Benzotriazole | $2^1A'$  | 4.48              | 4.5              | -0.02      | valence   | gas phase   | any      | 37   |
| 1H-Benzotriazole | $3^1A'$  | 5.05              | 5.2              | -0.15      | valence   | gas phase   | any      | 37   |
| 1H-Benzotriazole | $4^1A'$  | 6.27              | 6.2              | 0.07       | valence   | any         | any      | 37   |
| 1H-Benzotriazole | $5^1A'$  | 6.28              | 6.2              | 0.08       | valence   | any         | any      | 37   |
| 2H-Benzotriazole | $2^1A_1$ | 4.54              | 4.5              | 0.04       | valence   | gas phase   | any      | 37   |
| 2H-Benzotriazole | $1^1B_2$ | 4.60              | 4.5              | 0.10       | valence   | gas phase   | any      | 37   |
| Acrolein         | $1^1A''$ | 3.63              | 3.73             | -0.1       | valence   | gas phase   | any      | 37   |
| Acrolein         | $2^1A'$  | 6.10              | 6.41             | -0.31      | valence   | gas phase   | any      | 38   |
| Acrolein         | $1^1A'$  | 6.97              | 7.08             | -0.11      | Rydberg   | gas phase   | any      | 38   |
| Acrolein         | $1^1A'$  | 7.49              | 7.38             | 0.11       | Rydberg   | gas phase   | any      | 38   |
| Acrolein         | $1^1A'$  | 7.55              | 7.51             | 0.04       | Rydberg   | gas phase   | any      | 38   |
| Acrolein         | $1^1A'$  | 8.29              | 8.37             | -0.08      | Rydberg   | gas phase   | any      | 38   |
| Acrolein         | $1^1A''$ | 7.76              | 7.75             | 0.01       | Rydberg   | gas phase   | any      | 38   |
| Acrolein         | $1^1A'$  | 8.45              | 8.49             | -0.04      | Rydberg   | gas phase   | any      | 39   |
| Azulene          | $1^1B_2$ | 1.66              | 1.78             | -0.12      | valence   | gas phase   | any      | 39   |
| Azulene          | $2^1A_1$ | 3.67              | 3.56             | 0.11       | valence   | gas phase   | any      | 39   |
| Azulene          | $2^1B_2$ | 4.07              | 4.23             | -0.16      | valence   | gas phase   | any      | 39   |
| Azulene          | $3^1A_1$ | 4.63              | 4.4              | 0.23       | valence   | gas phase   | any      | 39   |
| 2,2-Bithiophene  | $1^1B_u$ | 4.22              | 4.13             | 0.09       | valence   | gas phase   | standard | 39   |
| 2,2-Bithiophene  | $2^1B_u$ | 4.36              | 4.13             | 0.23       | valence   | gas phase   | standard | 40   |
| 2,2-Bithiophene  | $1^3B_u$ | 2.07              | 2.26             | -0.19      | valence   | gas phase   | standard | 40   |
| Acetone          | $1^1A_2$ | 4.49              | 4.38             | 0.11       | valence   | gas phase   | standard | 41   |
| Acetone          | $1^1B_2$ | 6.57              | 6.35             | 0.22       | Rydberg   | gas phase   | standard | 41   |

Table S1: ... continued

| Molecule | State     | $V^{\text{calc}}$ | $V^{\text{exp}}$ | $\Delta V$ | Character | Environment | Method   | Ref. |
|----------|-----------|-------------------|------------------|------------|-----------|-------------|----------|------|
| Acetone  | ${}^1B_2$ | 7.54              | 7.45             | 0.09       | Rydberg   | gas phase   | standard | 41   |
| Acetone  | ${}^1A_1$ | 7.73              | 7.41             | 0.32       | Rydberg   | gas phase   | standard | 41   |
| Acetone  | ${}^1A_2$ | 7.75              | 7.36             | 0.39       | Rydberg   | gas phase   | standard | 41   |
| Acetone  | ${}^1A_1$ | 7.86              | 7.8              | 0.06       | Rydberg   | gas phase   | standard | 41   |
| Acetone  | ${}^1B_2$ | 8.14              | 8.09             | 0.05       | Rydberg   | gas phase   | standard | 41   |
| Acetone  | ${}^1B_1$ | 8.33              | 8.17             | 0.16       | Rydberg   | gas phase   | standard | 41   |

## S2 CASPT2/CASSCF vs. FCI Benchmark

### S2.1 Computational Details

The general computational details for our FCI/CASPT2 benchmark calculations are given in section 4.1 in the main paper. Here, we only discuss a few additional issues. All states comprised in our benchmark set are given in Tables S4 and S5 for the 6-31G and 6-311G basis sets, respectively.

As may be seen by inspecting these tables, the number of low-lying electronic states considered varies from molecule to molecule. Each number was inspired by results obtained in previous FCI calculations<sup>42-49</sup> and the goal to cover the most probable low-lying excitations that could be expected on the basis of simple orbital considerations regarding only the valence orbitals in the active spaces.

Initially, we pondered to use the already published FCI results for our reference data. However, most of these studies use different basis sets often augmented with diffuse function to also describe Rydberg states. Since our aim was only to investigate valence excited states using a consistent treatment for all the molecules, all the FCI calculations were repeated using the 6-31G and 6-311G basis sets.

A comment is important here regarding the effect of lowering the symmetry in the calculations of the linear diatomic molecules. Symmetry lowering was unavoidable since both MOLPRO and MOLCAS only support the usage of Abelian point groups with the highest symmetric point group being  $D_{2h}$ . In Abelian point groups, there exist only one-dimensional irreducible representations. Thus, states that are degenerate by symmetry in the linear point groups, e.g.,  $\Pi$  or  $\Delta$  states, transform according to different irreducible representations. The correspondence of the irreducible representations is shown in Table S2.

A symmetry lowering does not affect the degeneracies in the FCI calculations, but it can have an effect on the degeneracies in the CASSCF/CASPT2 calculations. When computing  $\Sigma$  and  $\Delta$  states, one of the components of the  $\Delta$  state and the  $\Sigma$  state can fall into the same irreducible representation. Since we used state-averaged CASSCF, the CASSCF wave functions of both components of the  $\Delta$  state then will differ leading to splitting of the energies of both components. The average splitting of the CASSCF energies is 0.07 eV and it is reduced again in the multi-state CASPT2 treatment to 0.05 eV. Note that the  $\Pi$  states are not affected by

Table S2: Correspondence of irreducible representations of the linear point groups  $D_{\infty h}$  and  $C_{\infty v}$  with the Abelian point groups  $D_{2h}$  and  $C_{2v}$  used in the calculation, respectively.

| $D_{\infty h}$ | $D_{2h}$               | $C_{\infty v}$ | $C_{2v}$         |
|----------------|------------------------|----------------|------------------|
| $\Sigma_g^+$   | $A_g$                  | $\Sigma^+$     | $A_1$            |
| $\Sigma_g^-$   | $B_{1g}$               | $\Sigma^-$     | $A_2$            |
| $\Pi_g$        | $B_{2g} \oplus B_{3g}$ | $\Pi$          | $B_1 \oplus B_2$ |
| $\Delta_g$     | $A_g \oplus B_{1g}$    | $\Delta$       | $A_1 \oplus A_2$ |
| $\Sigma_u^+$   | $B_{1u}$               |                |                  |
| $\Sigma_u^-$   | $A_u$                  |                |                  |
| $\Pi_u$        | $B_{2u} \oplus B_{3u}$ |                |                  |
| $\Delta_u$     | $B_{1u} \oplus A_u$    |                |                  |

symmetry lowering since no single states fall into one of the irreducible representations of the individual components. To avoid double counting when computing the mean errors, only one component of each  $\Pi$  state is considered and we simply take the mean value of the energies of both  $\Delta$  components since it does not have a significant effect on the size of the errors.

## S2.2 Closed-Shell vs. Open-Shell Characterization

In this section, we explain how we determined whether a states is “closed-shell” or “open-shell”. Let us first consider only the molecules with an even number of electrons. For them, each electronic state is described in either a FCI or a CASSCF/CASPT2 calculations by linear combination of both closed-shell and open-shell determinants or configurational state functions (which are spin-adapted linear combinations of single determinants) thus being neither purely closed-shell nor purely open-shell. Still, the majority of the states are dominated by a single or a small number of configurations giving them approximately closed-shell or open-shell character. To introduce this characterization for each state, we considered the leading configurations of the wave functions obtained by a MS-CASPT2 treatment and calculated the mean number of open shells (NOS) by counting the number of open shells of each configuration and weighting it by the corresponding coefficient of the configuration in the wave function. To illustrate this with one example, consider a wave function represented by a single configuration. If all the orbitals are doubly occupied,  $\text{NOS} = 0$ . When one electron is promoted from an occupied to an unoccupied orbital,  $\text{NOS} = 2$  as two orbitals are singly occupied. Promoting a second electron can already give rise to three different cases:  $\text{NOS} = 0$ ,  $\text{NOS} = 2$ , and  $\text{NOS} = 4$ . In the averaging we did not consider the complete wave function, but considered only the

configurations with a coefficient larger than a threshold of 0.05, which is set as default print level in a MOLCAS CASPT2 calculation.

Then, we finally characterize every state with  $\text{NOS} < 0.5$  as closed-shell and every state with  $\text{NOS} > 0.5$  as open-shell. We chose this smaller value of  $\text{NOS} = 0.5$  rather than  $\text{NOS} = 1$  for discrimination as our main interest still lies in the difference between the performance of NOIPEA and IPEA CASPT2. When a state possesses an already substantial amount of open-shell character, one should expect a sizable impact of the IPEA shift. We applied the same procedure also to all states of the molecules with an odd number of electrons. Here, necessarily,  $\text{NOS} > 1$ , as we have at least one partially filled shell. However, as the effect of the IPEA shift should scale with the difference in the number of open shells, we simply shift our criterion by 1, i.e.,  $\text{NOS} < 1.5$  and  $\text{NOS} > 1.5$  for closed-shell and open-shell states of molecules with an odd number of electrons. The NOS values of all states are reported in Tables S4 and S5.

Using the NOS criterion to characterize a state as closed-shell or open-shell bring us to the question whether or not to include both components of each  $\Delta$  state instead of their average results when calculating the errors. Due to the symmetry lowering, both components fall into different irreducible representations in the lower-symmetry point group and their wave functions differ in the number of open shells. Consider for example the  $1^1\Delta$  state belonging to the  $(1\sigma^+)^2(2\sigma^+)^2(1\pi1\pi)^2$  electronic configuration of the HB molecule. In the lowered  $C_{2v}$  symmetry the  $^1\Delta$  state splits up into a  $^1A_1$  and a  $^1A_2$  state. The  $\sigma^+$  orbitals become  $a_1$  orbitals while the  $1\pi$  orbitals split up into the  $1b_1$  and  $1b_2$  orbitals. The wave function of the  $^1A_1$  component is given by the linear combination of the configuration where both electrons are in the same orbitals, i.e.,

$$|\Psi(^1A_1)\rangle = c_{A_1} \left( |(1a_1)^2(2a_1)^2(1b_1)^2(1b_2)^0| - |(1a_1)^2(2a_1)^2(1b_1)^0(1b_2)^2| \right) + \dots \quad (\text{S1})$$

while in the leading configuration of the wave function of the  $^1A_2$  component the electrons in the  $\pi$  orbitals are in the symmetry-distinct  $b_1$  and  $b_2$  orbitals:

$$|\Psi(^1A_2)\rangle = c_{A_2} |(1a_1)^2(2a_1)^2(1b_1)^1(1b_2)^1| + \dots \quad (\text{S2})$$

In the original  $C_{\infty v}$  point group, both components should be characterized as open-shell, since the  $(1\pi1\pi)$  double shell is not fully occupied. In the lowered  $C_{2v}$  symmetry,  $\text{NOS}(^1A_2) \approx 2$

while  $\text{NOS}(^1A_1) \approx 0$ , making the latter state “closed-shell” by our definition. Thus, both components are affected differently when employing the IPEA-shifted CASPT2 and to capture this difference, we decided to include both components of each  $\Delta$  state when calculating the errors in Table 2.

## S2.3 Ground State Geometries of Di- and Triatomic Molecules

The Cartesian coordinates of the ground-state geometries of the di- and triatomic molecules used in the CASSCF/CASPT2 vs. FCI benchmark are given in Table S3. The geometries of the diatomic molecules were taken from the NIST database<sup>50</sup> while for the triatomic molecules we used geometries employed in previous FCI studies.<sup>43,45</sup>

Table S3: Cartesian coordinates in Å of of the di- and triatomic molecules used in the FCI and CASSCF/CASPT2 calculations. Ground-state geometries adopted from the NIST database and previous FCI studies.<sup>43,45,50</sup>

| Atom      | x        | y        | z        |
|-----------|----------|----------|----------|
| <hr/> HLi |          |          |          |
| H         | 0.000000 | 0.000000 | 0.79785  |
| Li        | 0.000000 | 0.000000 | -0.79785 |
| <hr/> HBe |          |          |          |
| H         | 0.67130  | 0.000000 | 0.000000 |
| Be        | -0.67130 | 0.000000 | 0.000000 |
| <hr/> HB  |          |          |          |
| H         | 0.000000 | 0.000000 | 0.61620  |
| B         | 0.000000 | 0.000000 | -0.61620 |
| <hr/> HC  |          |          |          |
| H         | 0.000000 | 0.000000 | -0.55995 |
| C         | 0.000000 | 0.000000 | 0.55995  |
| <hr/> HN  |          |          |          |
| H         | 0.000000 | 0.000000 | -0.51810 |
| N         | 0.000000 | 0.000000 | 0.51810  |
| <hr/> HO  |          |          |          |
| H         | 0.000000 | 0.000000 | -0.48483 |
| O         | 0.000000 | 0.000000 | 0.48483  |

Table S3: ... continued

| Atom             | x        | y        | z        |
|------------------|----------|----------|----------|
| <hr/>            |          |          |          |
| HF               |          |          |          |
| H                | 0.00000  | 0.00000  | 0.45840  |
| F                | 0.00000  | 0.00000  | -0.45840 |
| <hr/>            |          |          |          |
| Li <sub>2</sub>  |          |          |          |
| Li               | 0.00000  | 0.00000  | 1.33645  |
| Li               | 0.00000  | 0.00000  | -1.33645 |
| <hr/>            |          |          |          |
| B <sub>2</sub>   |          |          |          |
| B                | 0.00000  | 0.00000  | 0.79500  |
| B                | 0.00000  | 0.00000  | -0.79500 |
| <hr/>            |          |          |          |
| C <sub>2</sub>   |          |          |          |
| C                | 0.00000  | 0.00000  | 0.62125  |
| C                | 0.00000  | 0.00000  | -0.62125 |
| <hr/>            |          |          |          |
| N <sub>2</sub>   |          |          |          |
| N                | 0.00000  | 0.000000 | 0.54884  |
| N                | 0.00000  | 0.000000 | -0.54884 |
| <hr/>            |          |          |          |
| H <sub>2</sub> O |          |          |          |
| O                | 0.00000  | 0.00000  | 0.00000  |
| H                | 0.00000  | 0.75667  | -0.58588 |
| H                | 0.00000  | -0.75667 | -0.58588 |
| <hr/>            |          |          |          |
| CH <sub>2</sub>  |          |          |          |
| C                | 0.00000  | 0.00000  | 0.00000  |
| H                | 0.87016  | 0.00000  | 0.69963  |
| H                | -0.87016 | 0.00000  | 0.69963  |

## S2.4 Excited State Energies of Di- and Triatomic Molecules

The total energies and vertical excitation energies at FCI, CASPT2, and CASSCF levels of theory of the set of di- and triatomic molecules computed using the 6-31G and 6-311G basis sets are presented in Tables S4 and S5, respectively. Every state of the linear molecules is

classified according to its irreducible representation in the original linear molecular point group as well as the Abelian point group used in the calculations. In addition, for characterization, we give the transition corresponding to the leading configuration in the wave function expansion for each excited state as well as the average NOS of the wave function calculated at CASPT2 (IPEA) level of theory. The corresponding NOS values obtained at the other levels of theory are practically the same and therefore not reprinted here.

Table S4: Total energies  $E_X$  in a.u. and vertical excitation energies  $V_X$  in eV of di- and triatomic molecules ( $X = \text{FCI, IPEA, NOIPEA, NOIPEA, NOIPEA, CASSCF}$ ) calculated using the 6-31G basis set.

| Molecule | State          | Irrep     | Transition           | NOS  | $E_{\text{FCI}}$ | $V_{\text{FCI}}$ | $E_{\text{IPEA}}$ | $V_{\text{IPEA}}$ | $E_{\text{NOIPEA}}$ | $V_{\text{NOIPEA}}$ | $E_{\text{CASSCF}}$ | $V_{\text{CASSCF}}$ |
|----------|----------------|-----------|----------------------|------|------------------|------------------|-------------------|-------------------|---------------------|---------------------|---------------------|---------------------|
| HLi      | 1 $^1\Sigma^+$ | 1 $^1A_1$ | ground state         | 0.27 | -7.998288        | 0.00             | -7.992655         | 0.00              | -7.992874           | 0.00                | -7.976800           | 0.00                |
| HLi      | 1 $^3\Sigma^+$ | 1 $^3A_1$ | $2\sigma^+$          | 2.00 | -7.894657        | 2.82             | -7.894628         | 2.67              | -7.894649           | 2.67                | -7.894194           | 2.25                |
| HLi      | 2 $^1\Sigma^+$ | 2 $^1A_1$ | $2\sigma^+$          | 1.88 | -7.877487        | 3.29             | -7.875388         | 3.19              | -7.875664           | 3.19                | -7.866460           | 3.00                |
| HLi      | 1 $^3\Pi$      | 1 $^3B_1$ | $2\sigma^+$          | 2.00 | -7.850984        | 4.01             | -7.850957         | 3.86              | -7.850978           | 3.86                | -7.850665           | 3.43                |
| HLi      | 1 $^1\Pi$      | 1 $^1B_1$ | $2\sigma^+$          | 2.00 | -7.839268        | 4.33             | -7.839206         | 4.18              | -7.839259           | 4.18                | -7.838661           | 3.76                |
| HLi      | 2 $^3\Sigma^+$ | 2 $^3A_1$ | $2\sigma^+$          | 2.00 | -7.780935        | 5.91             | -7.780903         | 5.76              | -7.780936           | 5.77                | -7.780437           | 5.34                |
| HLi      | 3 $^1\Sigma^+$ | 3 $^1A_1$ | $2\sigma^+$          | 1.85 | -7.739166        | 7.05             | -7.737090         | 6.95              | -7.737338           | 6.95                | -7.730082           | 6.71                |
| HBe      | 1 $^2\Sigma^+$ | 1 $^2A_1$ | ground state         | 1.00 | -15.168530       | 0.00             | -15.164473        | 0.00              | -15.164866          | 0.00                | -15.151019          | 0.00                |
| HBe      | 1 $^2\Pi$      | 1 $^2B_1$ | $3\sigma^+$          | 1.38 | -15.071940       | 2.63             | -15.070017        | 2.57              | -15.070269          | 2.57                | -15.064755          | 2.35                |
| HBe      | 2 $^2\Sigma^+$ | 2 $^2A_1$ | $2\sigma^+$          | 1.04 | -14.959181       | 5.70             | -14.956713        | 5.65              | -14.957606          | 5.64                | -14.944579          | 5.62                |
| HBe      | 1 $^4\Pi$      | 1 $^4B_1$ | $2\sigma^+$          | 3.00 | -14.956132       | 5.78             | -14.955511        | 5.69              | -14.955753          | 5.69                | -14.953289          | 5.38                |
| HBe      | 2 $^2\Pi$      | 2 $^2B_1$ | $2\sigma^+$          | 2.64 | -14.883226       | 7.76             | -14.881596        | 7.70              | -14.882155          | 7.69                | -14.876424          | 7.47                |
| HBe      | 1 $^4\Sigma^-$ | 1 $^4A_2$ | $2\sigma^+3\sigma^+$ | 3.00 | -14.857782       | 8.46             | -14.856580        | 8.38              | -14.857143          | 8.37                | -14.853365          | 8.10                |
| HBe      | 3 $^2\Sigma^+$ | 3 $^2A_1$ | $3\sigma^+$          | 1.04 | -14.844509       | 8.82             | -14.837514        | 8.90              | -14.839366          | 8.86                | -14.819111          | 9.03                |
| HB       | 1 $^1\Sigma^+$ | 1 $^1A_1$ | ground state         | 0.16 | -25.172658       | 0.00             | -25.166538        | 0.00              | -25.166932          | 0.00                | -25.146715          | 0.00                |
| HB       | 1 $^3\Pi$      | 1 $^3B_1$ | $3\sigma^+$          | 2.02 | -25.135195       | 1.02             | -25.131391        | 0.96              | -25.132062          | 0.95                | -25.117839          | 0.79                |
| HB       | 1 $^1\Pi$      | 1 $^1B_1$ | $3\sigma^+$          | 2.05 | -25.057804       | 3.13             | -25.053161        | 3.09              | -25.054220          | 3.07                | -25.035203          | 3.03                |
| HB       | 1 $^3\Sigma^-$ | 1 $^3A_2$ | $3\sigma^+3\sigma^+$ | 2.15 | -25.011959       | 4.37             | -25.009182        | 4.28              | -25.010086          | 4.27                | -24.998528          | 4.03                |
| HB       | 1 $^1\Delta$   | 1 $^1A_2$ | $3\sigma^+3\sigma^+$ | 2.00 | -24.938543       | 6.37             | -24.934352        | 6.32              | -24.935545          | 6.30                | -24.922057          | 6.11                |
| HB       | 1 $^1\Delta$   | 2 $^1A_1$ | $3\sigma^+3\sigma^+$ | 0.00 | -24.938543       | 6.37             | -24.932211        | 6.38              | -24.933162          | 6.36                | -24.911989          | 6.39                |
| HB       | 1 $^5\Sigma^-$ | 1 $^5A_2$ | $2\sigma^+3\sigma^+$ | 4.00 | -24.904910       | 7.29             | -24.903268        | 7.16              | -24.904327          | 7.15                | -24.894818          | 6.85                |
| HB       | 2 $^1\Sigma^+$ | 3 $^1A_1$ | $3\sigma^+3\sigma^+$ | 0.02 | -24.897303       | 7.49             | -24.890055        | 7.52              | -24.891412          | 7.50                | -24.864102          | 7.69                |
| HB       | 1 $^3\Sigma^+$ | 1 $^3A_1$ | $3\sigma^+$          | 2.00 | -24.872277       | 8.17             | -24.867938        | 8.13              | -24.868977          | 8.11                | -24.853783          | 7.97                |
| HB       | 2 $^3\Pi$      | 2 $^3B_1$ | $2\sigma^+$          | 2.03 | -24.868032       | 8.29             | -24.864302        | 8.22              | -24.865521          | 8.20                | -24.850008          | 8.07                |

Table S4: . . . continued

| Molecule | State         | Irrep    | Transition           | NOS         | $E_{\text{FCI}}$ | $V_{\text{FCI}}$ | $E_{\text{IPEA}}$ | $V_{\text{IPEA}}$ | $E_{\text{NOIPEA}}$ | $V_{\text{NOIPEA}}$ | $E_{\text{CASSCF}}$ | $V_{\text{CASSCF}}$ |       |
|----------|---------------|----------|----------------------|-------------|------------------|------------------|-------------------|-------------------|---------------------|---------------------|---------------------|---------------------|-------|
| HB       | $3^1\Sigma^+$ | $4^1A_1$ | $3\sigma^+$          | $4\sigma^+$ | 1.84             | -24.779361       | 10.70             | -24.770581        | 10.77               | -24.772025          | 10.75               | -24.744664          | 10.94 |
| HB       | $2^1\Pi$      | $2^1B_1$ | $2\sigma^+$          | $1\pi$      | 2.02             | -24.773093       | 10.87             | -24.768335        | 10.84               | -24.770627          | 10.78               | -24.748111          | 10.85 |
| HC       | $1^2\Pi$      | $1^2B_1$ | ground state         |             | 1.12             | -38.317559       | 0.00              | -38.308791        | 0.00                | -38.309691          | 0.00                | -38.275349          | 0.00  |
| HC       | $1^4\Sigma^-$ | $1^4A_2$ | $3\sigma^+$          | $1\pi$      | 3.04             | -38.314493       | 0.08              | -38.309690        | -0.02               | -38.311301          | -0.04               | -38.284238          | -0.24 |
| HC       | $1^2\Delta$   | $1^2A_1$ | $3\sigma^+$          | $1\pi$      | 1.02             | -38.203321       | 3.11              | -38.196137        | 3.06                | -38.198138          | 3.03                | -38.163163          | 3.05  |
| HC       | $1^2\Delta$   | $1^2A_2$ | $3\sigma^+$          | $1\pi$      | 3.02             | -38.203321       | 3.11              | -38.196769        | 3.05                | -38.198935          | 3.01                | -38.168323          | 2.91  |
| HC       | $1^2\Sigma^-$ | $2^2A_2$ | $3\sigma^+$          | $1\pi$      | 3.05             | -38.192365       | 3.41              | -38.183537        | 3.41                | -38.185315          | 3.38                | -38.157630          | 3.20  |
| HC       | $1^2\Sigma^+$ | $2^2A_1$ | $3\sigma^+$          | $1\pi$      | 1.02             | -38.170008       | 4.02              | -38.162050        | 3.99                | -38.164553          | 3.95                | -38.124533          | 4.10  |
| HC       | $2^2\Pi$      | $2^2B_2$ | $3\sigma^+3\sigma^+$ | $1\pi1\pi$  | 1.06             | -38.030392       | 7.81              | -38.020737        | 7.84                | -38.021813          | 7.83                | -37.982165          | 7.98  |
| HC       | $2^2\Sigma^+$ | $3^2A_1$ | $1\pi$               | $4\sigma^+$ | 1.02             | -38.016478       | 8.19              | -38.007106        | 8.22                | -38.008447          | 8.20                | -37.973916          | 8.27  |
| HC       | $1^4\Pi$      | $1^4B_1$ | $3\sigma^+$          | $4\sigma^+$ | 3.00             | -38.002555       | 8.57              | -37.995977        | 8.51                | -37.998066          | 8.48                | -37.966952          | 8.39  |
| HC       | $2^4\Sigma^-$ | $2^4A_2$ | $2\sigma^+$          | $1\pi$      | 3.00             | -37.983167       | 9.10              | -37.978372        | 8.99                | -37.980152          | 8.97                | -37.951370          | 8.82  |
| HC       | $3^2\Pi$      | $3^2B_1$ | $3\sigma^+$          | $4\sigma^+$ | 2.98             | -37.939841       | 10.28             | -37.933685        | 10.21               | -37.936593          | 10.15               | -37.902946          | 10.13 |
| HC       | $4^2\Pi$      | $4^2B_1$ | $3\sigma^+$          | $4\sigma^+$ | 2.92             | -37.882900       | 11.83             | -37.873849        | 11.84               | -37.878405          | 11.74               | -37.831697          | 12.07 |
| HC       | $2^2\Delta$   | $3^2A_2$ | $2\sigma^+$          | $1\pi$      | 3.00             | -37.860442       | 12.44             | -37.847611        | 12.55               | -37.850254          | 12.50               | -37.820397          | 12.38 |
| HC       | $2^2\Delta$   | $4^2A_1$ | $2\sigma^+$          | $1\pi$      | 1.03             | -37.860442       | 12.44             | -37.853649        | 12.38               | -37.857009          | 12.31               | -37.819169          | 12.37 |
| HC       | $2^4\Pi$      | $2^4B_1$ | $2\sigma^+3\sigma^+$ | $1\pi1\pi$  | 3.00             | -37.843183       | 12.91             | -37.835232        | 12.89               | -37.837092          | 12.86               | -37.798862          | 12.97 |
| HN       | $1^3\Sigma^-$ | $1^3A_2$ | ground state         |             | 2.11             | -55.012997       | 0.00              | -55.001825        | 0.00                | -55.003849          | 0.00                | -54.943921          | 0.00  |
| HN       | $1^1\Delta$   | $1^1A_1$ | ground state         |             | 0.03             | -54.940550       | 1.97              | -54.932055        | 1.90                | -54.933834          | 1.91                | -54.875231          | 1.87  |
| HN       | $1^1\Delta$   | $1^1A_2$ | ground state         |             | 2.10             | -54.940550       | 1.97              | -54.930126        | 1.95                | -54.932227          | 1.95                | -54.871892          | 1.96  |
| HN       | $1^1\Sigma^+$ | $2^1A_1$ | ground state         |             | 0.05             | -54.912466       | 2.74              | -54.904094        | 2.66                | -54.906234          | 2.66                | -54.844115          | 2.72  |
| HN       | $1^3\Pi$      | $1^3B_1$ | $3\sigma^+$          | $1\pi$      | 2.01             | -54.873191       | 3.80              | -54.863587        | 3.76                | -54.865370          | 3.77                | -54.806500          | 3.74  |
| HN       | $1^1\Pi$      | $1^1B_2$ | $3\sigma^+$          | $1\pi$      | 2.02             | -54.793632       | 5.97              | -54.783156        | 5.95                | -54.785278          | 5.95                | -54.718202          | 6.14  |
| HN       | $1^5\Sigma^-$ | $1^5A_2$ | $3\sigma^+$          | $4\sigma^+$ | 4.00             | -54.682608       | 8.99              | -54.676073        | 8.86                | -54.678413          | 8.86                | -54.638685          | 8.31  |
| HN       | $2^3\Pi$      | $2^3B_2$ | $1\pi$               | $4\sigma^+$ | 2.01             | -54.653530       | 9.78              | -54.643710        | 9.74                | -54.645781          | 9.74                | -54.596211          | 9.46  |

Table S4: . . . continued

| Molecule | State         | Irrep    | Transition           | NOS          | $E_{\text{FCI}}$ | $V_{\text{FCI}}$ | $E_{\text{IPEA}}$ | $V_{\text{IPEA}}$ | $E_{\text{NOIPEA}}$ | $V_{\text{NOIPEA}}$ | $E_{\text{CASSCF}}$ | $V_{\text{CASSCF}}$ |       |
|----------|---------------|----------|----------------------|--------------|------------------|------------------|-------------------|-------------------|---------------------|---------------------|---------------------|---------------------|-------|
| HN       | $2^1\Pi$      | $2^1B_1$ | $1\pi$               | $4\sigma^+$  | 2.01             | -54.628334       | 10.47             | -54.620289        | 10.38               | -54.621755          | 10.40               | -54.575868          | 10.02 |
| HN       | $2^3\Sigma^-$ | $2^3A_2$ | $3\sigma^+$          | $4\sigma^+$  | 3.97             | -54.606234       | 11.07             | -54.602816        | 10.86               | -54.606992          | 10.80               | -54.553289          | 10.63 |
| HN       | $2^1\Sigma^+$ | $3^1A_1$ | $3\sigma^+3\sigma^+$ | $1\pi1\pi$   | 0.01             | -54.595484       | 11.36             | -54.571286        | 11.72               | -54.571775          | 11.76               | -54.522499          | 11.47 |
| HN       | $1^3\Delta$   | $3^3A_2$ | $3\sigma^+$          | $4\sigma^+$  | 4.00             | -54.555943       | 12.44             | -54.548549        | 12.33               | -54.550929          | 12.32               | -54.507259          | 11.88 |
| HN       | $1^3\Delta$   | $1^3A_1$ | $3\sigma^+$          | $4\sigma^+$  | 2.00             | -54.555943       | 12.44             | -54.549594        | 12.31               | -54.552159          | 12.29               | -54.509907          | 11.81 |
| HN       | $1^1\Sigma^-$ | $2^1A_2$ | $3\sigma^+$          | $4\sigma^+$  | 4.00             | -54.535117       | 13.00             | -54.527317        | 12.91               | -54.530056          | 12.89               | -54.481969          | 12.57 |
| HN       | $3^3\Sigma^-$ | $4^3A_2$ | $3\sigma^+$          | $4\sigma^+$  | 3.96             | -54.527655       | 13.21             | -54.522835        | 13.03               | -54.528938          | 12.92               | -54.457496          | 13.24 |
| HN       | $1^3\Sigma^+$ | $2^3A_1$ | $3\sigma^+$          | $4\sigma^+$  | 2.00             | -54.523622       | 13.32             | -54.516457        | 13.21               | -54.519694          | 13.17               | -54.474378          | 12.78 |
| HN       | $2^1\Delta$   | $4^1A_1$ | $3\sigma^+$          | $4\sigma^+$  | 1.94             | -54.465807       | 14.89             | -54.463406        | 14.65               | -54.468857          | 14.56               | -54.387178          | 15.15 |
| HN       | $2^1\Delta$   | $3^1A_2$ | $3\sigma^+$          | $4\sigma^+$  | 3.91             | -54.465807       | 14.89             | -54.457928        | 14.80               | -54.462978          | 14.72               | -54.393155          | 14.99 |
| HN       | $3^3\Pi$      | $3^3B_2$ | $2\sigma^+$          | $1\pi$       | 2.05             | -54.455919       | 15.16             | -54.446022        | 15.12               | -54.449447          | 15.09               | -54.389739          | 15.08 |
| HO       | $1^2\Pi$      | $1^2B_1$ | ground state         | ground state | 1.09             | -75.462853       | 0.00              | -75.452928        | 0.00                | -75.454547          | 0.00                | -75.362404          | 0.00  |
| HO       | $1^2\Sigma^+$ | $1^2A_1$ | $3\sigma^+$          | $1\pi$       | 1.01             | -75.304058       | 4.32              | -75.293485        | 4.34                | -75.294939          | 4.34                | -75.195876          | 4.53  |
| HO       | $1^4\Sigma^-$ | $1^4A_2$ | $1\pi$               | $4\sigma^+$  | 3.00             | -75.169726       | 7.98              | -75.162359        | 7.91                | -75.164385          | 7.90                | -75.102141          | 7.08  |
| HO       | $1^2\Sigma^-$ | $1^2A_2$ | $1\pi$               | $4\sigma^+$  | 3.00             | -75.133520       | 8.96              | -75.126199        | 8.89                | -75.128271          | 8.88                | -75.068876          | 7.99  |
| HO       | $1^2\Delta$   | $2^2A_2$ | $1\pi$               | $4\sigma^+$  | 1.00             | -75.069778       | 10.70             | -75.065742        | 10.54               | -75.067915          | 10.52               | -74.998242          | 9.91  |
| HO       | $1^2\Delta$   | $2^2A_1$ | $1\pi$               | $4\sigma^+$  | 3.00             | -75.069778       | 10.70             | -75.061872        | 10.64               | -75.063574          | 10.64               | -75.004438          | 9.74  |
| HO       | $1^4\Pi$      | $1^4B_1$ | $3\sigma^+$          | $4\sigma^+$  | 3.00             | -75.051577       | 11.19             | -75.044207        | 11.12               | -75.046148          | 11.11               | -74.985722          | 10.25 |
| HO       | $2^2\Sigma^+$ | $3^2A_1$ | $1\pi$               | $4\sigma^+$  | 1.01             | -75.033315       | 11.69             | -75.028516        | 11.55               | -75.031289          | 11.52               | -74.960318          | 10.94 |
| HO       | $2^2\Pi$      | $2^2B_1$ | $3\sigma^+$          | $4\sigma^+$  | 2.97             | -74.983683       | 13.04             | -74.980647        | 12.85               | -74.984061          | 12.80               | -74.907053          | 12.39 |
| HO       | $3^2\Pi$      | $3^2B_2$ | $3\sigma^+$          | $4\sigma^+$  | 2.94             | -74.921943       | 14.72             | -74.920548        | 14.49               | -74.926040          | 14.38               | -74.824471          | 14.64 |
| HF       | $1^1\Sigma^+$ | $1^1A_1$ | ground state         | ground state | 0.08             | -100.115685      | 0.00              | -100.110804       | 0.00                | -100.111473         | 0.00                | -99.981696          | 0.00  |
| HF       | $1^3\Pi$      | $1^3B_1$ | $1\pi$               | $4\sigma^+$  | 2.00             | -99.736831       | 10.31             | -99.731707        | 10.32               | -99.732999          | 10.30               | -99.644708          | 9.17  |
| HF       | $1^1\Pi$      | $1^1B_1$ | $1\pi$               | $4\sigma^+$  | 2.00             | -99.713030       | 10.96             | -99.708107        | 10.96               | -99.709176          | 10.95               | -99.623395          | 9.75  |
| HF       | $1^3\Sigma^+$ | $1^3A_1$ | $3\sigma^+$          | $4\sigma^+$  | 2.00             | -99.618485       | 13.53             | -99.613212        | 13.54               | -99.614382          | 13.53               | -99.527784          | 12.35 |

Table S4: . . . continued

| Molecule        | State           | Irrep       | Transition           | NOS  | $E_{FCI}$  | $V_{FCI}$ | $E_{IPEA}$ | $V_{IPEA}$ | $E_{NOIPEA}$ | $V_{NOIPEA}$ | $E_{CASSCF}$ | $V_{CASSCF}$ |
|-----------------|-----------------|-------------|----------------------|------|------------|-----------|------------|------------|--------------|--------------|--------------|--------------|
| HF              | $2^1\Sigma^+$   | $2^1A_1$    | $3\sigma^+$          | 1.92 | -99.520444 | 16.20     | -99.525469 | 15.93      | -99.528197   | 15.87        | -99.394340   | 15.98        |
| Li <sub>2</sub> | $1^1\Sigma_g^+$ | $1^1A_g$    | ground state         | 0.04 | -14.892789 | 0.00      | -14.891582 | 0.00       | -14.891670   | 0.00         | -14.889939   | 0.00         |
| Li <sub>2</sub> | $1^3\Sigma_u^+$ | $1^3B_{1u}$ | $2\sigma_g^+$        | 2.00 | -14.849371 | 1.18      | -14.849363 | 1.15       | -14.849366   | 1.15         | -14.849336   | 1.10         |
| Li <sub>2</sub> | $1^3\Pi_u$      | $1^3B_{3u}$ | $2\sigma_g^+$        | 2.00 | -14.840609 | 1.42      | -14.840355 | 1.39       | -14.840439   | 1.39         | -14.839860   | 1.36         |
| Li <sub>2</sub> | $1^1\Sigma_u^+$ | $1^1B_{1u}$ | $2\sigma_g^+$        | 2.00 | -14.824579 | 1.86      | -14.824564 | 1.82       | -14.824572   | 1.83         | -14.824507   | 1.78         |
| Li <sub>2</sub> | $2^1\Sigma_g^+$ | $2^1A_g$    | $2\sigma_g^+$        | 1.44 | -14.787198 | 2.87      | -14.786839 | 2.85       | -14.787007   | 2.85         | -14.785327   | 2.85         |
| Li <sub>2</sub> | $1^1\Pi_u$      | $1^1B_{3u}$ | $2\sigma_g^+$        | 2.00 | -14.784730 | 2.94      | -14.784199 | 2.92       | -14.784311   | 2.92         | -14.783587   | 2.89         |
| B <sub>2</sub>  | $1^3\Sigma_g^-$ | $1^3B_{1g}$ | ground state         | 2.13 | -49.218929 | 0.00      | -49.213932 | 0.00       | -49.215453   | 0.00         | -49.195990   | 0.00         |
| B <sub>2</sub>  | $1^5\Sigma_u^-$ | $1^5A_u$    | $2\sigma_u^+$        | 4.00 | -49.218158 | 0.02      | -49.214288 | -0.01      | -49.215643   | -0.01        | -49.199098   | -0.08        |
| B <sub>2</sub>  | $1^1\Delta_g$   | $1^1A_g$    | ground state         | 0.25 | -49.191996 | 0.73      | -49.186849 | 0.74       | -49.188326   | 0.74         | -49.167795   | 0.77         |
| B <sub>2</sub>  | $1^1\Delta_g$   | $1^1B_{1g}$ | ground state         | 2.12 | -49.191996 | 0.73      | -49.187420 | 0.72       | -49.188843   | 0.72         | -49.170573   | 0.69         |
| B <sub>2</sub>  | $1^3\Pi_u$      | $1^3B_{2u}$ | $1\pi_u$             | 2.09 | -49.185414 | 0.91      | -49.179414 | 0.94       | -49.181019   | 0.94         | -49.159703   | 0.99         |
| B <sub>2</sub>  | $1^1\Sigma_g^+$ | $2^1A_g$    | ground state         | 0.26 | -49.184183 | 0.95      | -49.178999 | 0.95       | -49.180725   | 0.95         | -49.158896   | 1.01         |
| B <sub>2</sub>  | $1^3\Delta_u$   | $1^3A_u$    | $2\sigma_u^+$        | 2.01 | -49.156269 | 1.71      | -49.151459 | 1.70       | -49.153473   | 1.69         | -49.133997   | 1.69         |
| B <sub>2</sub>  | $1^3\Delta_u$   | $1^3B_{1u}$ | $2\sigma_u^+$        | 3.86 | -49.156269 | 1.71      | -49.151508 | 1.70       | -49.153555   | 1.68         | -49.133931   | 1.69         |
| B <sub>2</sub>  | $1^1\Pi_u$      | $1^1B_{3u}$ | $1\pi_u$             | 2.15 | -49.148224 | 1.92      | -49.141836 | 1.96       | -49.143486   | 1.96         | -49.118092   | 2.12         |
| B <sub>2</sub>  | $1^3\Sigma_u^+$ | $2^3B_{1u}$ | $2\sigma_u^+$        | 2.01 | -49.146652 | 1.97      | -49.141673 | 1.97       | -49.143956   | 1.95         | -49.122506   | 2.00         |
| B <sub>2</sub>  | $1^3\Sigma_u^-$ | $2^3A_u$    | $2\sigma_u^+$        | 3.84 | -49.146202 | 1.98      | -49.140214 | 2.01       | -49.142826   | 1.98         | -49.117661   | 2.13         |
| B <sub>2</sub>  | $1^3\Pi_g$      | $1^3B_{3g}$ | $2\sigma_u^+$        | 2.14 | -49.137567 | 2.21      | -49.132271 | 2.22       | -49.133895   | 2.22         | -49.112704   | 2.27         |
| B <sub>2</sub>  | $2^1\Sigma_g^+$ | $3^1A_g$    | $1\pi_u 1\pi_u$      | 0.28 | -49.125735 | 2.54      | -49.118656 | 2.59       | -49.119352   | 2.62         | -49.096758   | 2.70         |
| B <sub>2</sub>  | $2^3\Pi_g$      | $2^3B_{3g}$ | $2\sigma_u^+ 1\pi_u$ | 2.02 | -49.104872 | 3.10      | -49.099113 | 3.12       | -49.101037   | 3.11         | -49.078565   | 3.20         |
| B <sub>2</sub>  | $1^1\Pi_g$      | $1^1B_{3g}$ | $2\sigma_u^+$        | 2.17 | -49.089482 | 3.52      | -49.084055 | 3.53       | -49.085593   | 3.53         | -49.065529   | 3.55         |
| C <sub>2</sub>  | $1^1\Sigma_g^+$ | $1^1A_g$    | ground state         | 0.39 | -75.640639 | 0.00      | -75.634133 | 0.00       | -75.636007   | 0.00         | -75.592449   | 0.00         |
| C <sub>2</sub>  | $1^3\Pi_u$      | $1^3B_{3u}$ | $1\pi_u$             | 2.08 | -75.610484 | 0.82      | -75.601912 | 0.88       | -75.603905   | 0.87         | -75.562567   | 0.81         |
| C <sub>2</sub>  | $1^3\Sigma_u^+$ | $1^3B_{1u}$ | $2\sigma_u^+$        | 2.09 | -75.599259 | 1.13      | -75.592370 | 1.14       | -75.594630   | 1.13         | -75.556431   | 0.98         |

Table S4: . . . continued

| Molecule         | State                                      | Irrep                          | Transition                                   | NOS  | E <sub>FCI</sub> | V <sub>FCI</sub> | E <sub>IPEA</sub> | V <sub>IPEA</sub> | E <sub>NOIPEA</sub> | V <sub>NOIPEA</sub> | E <sub>CASSCF</sub> | V <sub>CASSCF</sub> |
|------------------|--------------------------------------------|--------------------------------|----------------------------------------------|------|------------------|------------------|-------------------|-------------------|---------------------|---------------------|---------------------|---------------------|
| C <sub>2</sub>   | 1 <sup>1</sup> Π <sub>u</sub>              | 1 <sup>1</sup> B <sub>3u</sub> | 1π <sub>u</sub>                              | 2.10 | -75.560604       | 2.18             | -75.551441        | 2.25              | -75.553373          | 2.25                | -75.508413          | 2.29                |
| C <sub>2</sub>   | 1 <sup>3</sup> Σ <sub>g</sub> <sup>-</sup> | 1 <sup>3</sup> B <sub>1g</sub> | 1π <sub>u</sub> 1π <sub>u</sub>              | 2.04 | -75.549347       | 2.48             | -75.539666        | 2.57              | -75.541060          | 2.58                | -75.499408          | 2.53                |
| C <sub>2</sub>   | 1 <sup>3</sup> Π <sub>g</sub>              | 1 <sup>3</sup> B <sub>2g</sub> | 2σ <sub>u</sub> <sup>+</sup> 1π <sub>u</sub> | 2.13 | -75.529837       | 3.02             | -75.522060        | 3.05              | -75.524241          | 3.04                | -75.482934          | 2.98                |
| C <sub>2</sub>   | 2 <sup>1</sup> Σ <sub>g</sub> <sup>+</sup> | 2 <sup>1</sup> A <sub>g</sub>  | 1π <sub>u</sub> 1π <sub>u</sub>              | 0.20 | -75.519913       | 3.29             | -75.511146        | 3.35              | -75.512630          | 3.36                | -75.471243          | 3.30                |
| C <sub>2</sub>   | 1 <sup>1</sup> Δ <sub>g</sub>              | 3 <sup>1</sup> A <sub>g</sub>  | 1π <sub>u</sub> 1π <sub>u</sub>              | 0.20 | -75.515287       | 3.41             | -75.505881        | 3.49              | -75.512630          | 3.36                | -75.466282          | 3.43                |
| C <sub>2</sub>   | 1 <sup>1</sup> Δ <sub>g</sub>              | 1 <sup>1</sup> B <sub>1g</sub> | 1π <sub>u</sub> 1π <sub>u</sub>              | 2.04 | -75.515287       | 3.41             | -75.506304        | 3.48              | -75.507558          | 3.50                | -75.467256          | 3.41                |
| C <sub>2</sub>   | 1 <sup>5</sup> Σ <sub>g</sub> <sup>+</sup> | 1 <sup>5</sup> A <sub>g</sub>  | 2σ <sub>u</sub> <sup>+</sup> 1π <sub>u</sub> | 4.00 | -75.451023       | 5.16             | -75.445970        | 5.12              | -75.449312          | 5.08                | -75.405182          | 5.10                |
| C <sub>2</sub>   | 1 <sup>1</sup> Π <sub>g</sub>              | 1 <sup>1</sup> B <sub>2g</sub> | 2σ <sub>u</sub> <sup>+</sup> 1π <sub>u</sub> | 2.25 | -75.439775       | 5.47             | -75.430134        | 5.55              | -75.432500          | 5.54                | -75.385622          | 5.63                |
| C <sub>2</sub>   | 1 <sup>5</sup> Π <sub>g</sub>              | 1 <sup>5</sup> B <sub>2g</sub> | 1π <sub>u</sub> 1π <sub>u</sub>              | 4.01 | -75.407262       | 6.35             | -75.398560        | 6.41              | -75.401470          | 6.38                | -75.356992          | 6.41                |
| N <sub>2</sub>   | 1 <sup>1</sup> Σ <sub>g</sub> <sup>+</sup> | 1 <sup>1</sup> A <sub>g</sub>  | ground state                                 | 0.13 | -109.102922      | 0.00             | -109.092001       | 0.00              | -109.092717         | 0.00                | -109.028519         | 0.00                |
| N <sub>2</sub>   | 1 <sup>3</sup> Σ <sub>g</sub> <sup>+</sup> | 1 <sup>3</sup> B <sub>1u</sub> | 1π <sub>u</sub>                              | 2.01 | -108.816185      | 7.80             | -108.805864       | 7.79              | -108.808646         | 7.73                | -108.728625         | 8.16                |
| N <sub>2</sub>   | 1 <sup>3</sup> Π <sub>g</sub>              | 1 <sup>3</sup> B <sub>2g</sub> | 3σ <sub>g</sub> <sup>+</sup>                 | 2.08 | -108.812942      | 7.89             | -108.801750       | 7.90              | -108.804657         | 7.84                | -108.722200         | 8.34                |
| N <sub>2</sub>   | 1 <sup>1</sup> Π <sub>g</sub>              | 1 <sup>1</sup> B <sub>2g</sub> | 3σ <sub>g</sub> <sup>+</sup>                 | 2.06 | -108.766595      | 9.15             | -108.755577       | 9.15              | -108.758207         | 9.10                | -108.676142         | 9.59                |
| N <sub>2</sub>   | 1 <sup>3</sup> Δ <sub>u</sub>              | 1 <sup>3</sup> A <sub>u</sub>  | 1π <sub>u</sub>                              | 2.01 | -108.761260      | 9.30             | -108.750665       | 9.29              | -108.753634         | 9.23                | -108.672268         | 9.69                |
| N <sub>2</sub>   | 1 <sup>3</sup> Δ <sub>u</sub>              | 2 <sup>3</sup> B <sub>1u</sub> | 1π <sub>u</sub>                              | 2.00 | -108.761260      | 9.30             | -108.750779       | 9.29              | -108.753639         | 9.23                | -108.672355         | 9.69                |
| N <sub>2</sub>   | 1 <sup>3</sup> Σ <sub>u</sub> <sup>-</sup> | 2 <sup>3</sup> A <sub>u</sub>  | 1π <sub>u</sub>                              | 2.04 | -108.739696      | 9.88             | -108.729194       | 9.87              | -108.732523         | 9.80                | -108.647731         | 10.36               |
| N <sub>2</sub>   | 1 <sup>1</sup> Σ <sub>u</sub> <sup>-</sup> | 1 <sup>1</sup> A <sub>u</sub>  | 1π <sub>u</sub>                              | 2.00 | -108.713806      | 10.59            | -108.703798       | 10.56             | -108.706473         | 10.51               | -108.623284         | 11.03               |
| N <sub>2</sub>   | 1 <sup>1</sup> Δ <sub>u</sub>              | 1 <sup>1</sup> B <sub>1u</sub> | 1π <sub>u</sub>                              | 2.00 | -108.704655      | 10.84            | -108.694087       | 10.83             | -108.697670         | 10.75               | -108.611938         | 11.34               |
| N <sub>2</sub>   | 1 <sup>1</sup> Δ <sub>u</sub>              | 2 <sup>1</sup> A <sub>u</sub>  | 1π <sub>u</sub>                              | 2.04 | -108.704655      | 10.84            | -108.694600       | 10.81             | -108.697646         | 10.75               | -108.611881         | 11.34               |
| N <sub>2</sub>   | 1 <sup>3</sup> Π <sub>u</sub>              | 1 <sup>3</sup> B <sub>3u</sub> | 2σ <sub>u</sub> <sup>+</sup>                 | 2.16 | -108.698048      | 11.02            | -108.687285       | 11.01             | -108.690529         | 10.94               | -108.605983         | 11.50               |
| N <sub>2</sub>   | 1 <sup>1</sup> Π <sub>u</sub>              | 1 <sup>1</sup> B <sub>3u</sub> | 2σ <sub>u</sub> <sup>+</sup>                 | 2.17 | -108.608772      | 13.45            | -108.597230       | 13.46             | -108.600611         | 13.39               | -108.516990         | 13.92               |
| H <sub>2</sub> O | 1 <sup>1</sup> A <sub>1</sub>              | 1 <sup>1</sup> A <sub>1</sub>  | ground state                                 | 0.04 | -76.119893       | 0.00             | -76.110372        | 0.00              | -76.110827          | 0.00                | -76.012369          | 0.00                |
| H <sub>2</sub> O | 1 <sup>3</sup> B <sub>1</sub>              | 1 <sup>3</sup> B <sub>1</sub>  | 1b <sub>1</sub>                              | 2.00 | -75.834513       | 7.77             | -75.825716        | 7.75              | -75.827727          | 7.70                | -75.746831          | 7.23                |
| H <sub>2</sub> O | 1 <sup>1</sup> B <sub>1</sub>              | 1 <sup>1</sup> B <sub>1</sub>  | 1b <sub>1</sub>                              | 2.01 | -75.807603       | 8.50             | -75.799512        | 8.46              | -75.801259          | 8.42                | -75.721785          | 7.91                |
| H <sub>2</sub> O | 1 <sup>3</sup> A <sub>1</sub>              | 1 <sup>3</sup> A <sub>1</sub>  | 3a <sub>1</sub>                              | 2.00 | -75.752968       | 9.98             | -75.744456        | 9.96              | -75.746406          | 9.92                | -75.665945          | 9.43                |

Table S4: . . . continued

| Molecule         | State                         | Irrep                           | Transition                      | NOS  | $E_{FCI}$  | $V_{FCI}$ | $E_{IPEA}$ | $V_{IPEA}$ | $E_{NOIPEA}$ | $V_{NOIPEA}$ | $E_{CASSCF}$ | $V_{CASSCF}$ |
|------------------|-------------------------------|---------------------------------|---------------------------------|------|------------|-----------|------------|------------|--------------|--------------|--------------|--------------|
| H <sub>2</sub> O | 1 <sup>3</sup> A <sub>2</sub> | 1b <sub>1</sub>                 | 2b <sub>2</sub>                 | 2.01 | -75.743574 | 10.24     | -75.734894 | 10.22      | -75.736911   | 10.17        | -75.655790   | 9.70         |
| H <sub>2</sub> O | 1 <sup>1</sup> A <sub>2</sub> | 1b <sub>1</sub>                 | 2b <sub>2</sub>                 | 2.01 | -75.725081 | 10.74     | -75.717470 | 10.69      | -75.719283   | 10.65        | -75.640186   | 10.13        |
| H <sub>2</sub> O | 2 <sup>1</sup> A <sub>1</sub> | 3a <sub>1</sub>                 | 4a <sub>1</sub>                 | 2.00 | -75.715234 | 11.01     | -75.709901 | 10.90      | -75.712266   | 10.85        | -75.617344   | 10.75        |
| H <sub>2</sub> O | 1 <sup>3</sup> B <sub>2</sub> | 3a <sub>1</sub>                 | 2b <sub>2</sub>                 | 2.00 | -75.674139 | 12.13     | -75.667456 | 12.05      | -75.669851   | 12.00        | -75.575292   | 11.89        |
| H <sub>2</sub> O | 1 <sup>1</sup> B <sub>2</sub> | 3a <sub>1</sub>                 | 2b <sub>2</sub>                 | 2.00 | -75.626531 | 13.43     | -75.619074 | 13.37      | -75.620911   | 13.33        | -75.534493   | 13.00        |
| H <sub>2</sub> O | 2 <sup>3</sup> B <sub>2</sub> | 1b <sub>2</sub>                 | 4a <sub>1</sub>                 | 2.00 | -75.603947 | 14.04     | -75.596684 | 13.98      | -75.599357   | 13.92        | -75.503402   | 13.85        |
| CH <sub>2</sub>  | 1 <sup>3</sup> B <sub>2</sub> | ground state                    | ground state                    | 2.03 | -38.964139 | 0.00      | -38.956184 | 0.00       | -38.957525   | 0.00         | -38.919137   | 0.00         |
| CH <sub>2</sub>  | 1 <sup>1</sup> A <sub>1</sub> | 1b <sub>2</sub>                 | 3a <sub>1</sub>                 | 0.04 | -38.942886 | 0.58      | -38.933003 | 0.63       | -38.933498   | 0.65         | -38.894310   | 0.68         |
| CH <sub>2</sub>  | 1 <sup>1</sup> B <sub>2</sub> | ground state                    | ground state                    | 2.03 | -38.879494 | 2.30      | -38.870200 | 2.34       | -38.871996   | 2.33         | -38.828327   | 2.47         |
| CH <sub>2</sub>  | 2 <sup>1</sup> A <sub>1</sub> | 3a <sub>1</sub>                 | 1b <sub>2</sub>                 | 0.06 | -38.779344 | 5.03      | -38.768952 | 5.09       | -38.769562   | 5.11         | -38.727271   | 5.22         |
| CH <sub>2</sub>  | 1 <sup>3</sup> A <sub>2</sub> | 1b <sub>1</sub>                 | 3a <sub>1</sub>                 | 2.05 | -38.748964 | 5.86      | -38.740127 | 5.88       | -38.741715   | 5.87         | -38.699166   | 5.99         |
| CH <sub>2</sub>  | 1 <sup>1</sup> A <sub>2</sub> | 1b <sub>1</sub>                 | 3a <sub>1</sub>                 | 2.05 | -38.723281 | 6.55      | -38.715127 | 6.56       | -38.716832   | 6.55         | -38.673027   | 6.70         |
| CH <sub>2</sub>  | 1 <sup>3</sup> B <sub>1</sub> | 1b <sub>1</sub>                 | 1b <sub>2</sub>                 | 2.01 | -38.696464 | 7.28      | -38.686841 | 7.33       | -38.688812   | 7.31         | -38.637600   | 7.66         |
| CH <sub>2</sub>  | 1 <sup>3</sup> A <sub>1</sub> | 1b <sub>1</sub> 1b <sub>2</sub> | 3a <sub>1</sub> 4a <sub>1</sub> | 2.01 | -38.649015 | 8.57      | -38.640651 | 8.59       | -38.642379   | 8.58         | -38.607556   | 8.48         |
| CH <sub>2</sub>  | 1 <sup>1</sup> B <sub>1</sub> | 1b <sub>1</sub>                 | 1b <sub>2</sub>                 | 2.01 | -38.640493 | 8.81      | -38.631941 | 8.82       | -38.633787   | 8.81         | -38.587560   | 9.02         |
| CH <sub>2</sub>  | 3 <sup>1</sup> A <sub>1</sub> | 3a <sub>1</sub>                 | 4a <sub>1</sub>                 | 2.00 | -38.622397 | 9.30      | -38.613429 | 9.33       | -38.615343   | 9.31         | -38.572392   | 9.44         |
| CH <sub>2</sub>  | 2 <sup>3</sup> B <sub>1</sub> | 1b <sub>2</sub>                 | 2b <sub>1</sub>                 | 2.00 | -38.620846 | 9.34      | -38.611692 | 9.37       | -38.613568   | 9.36         | -38.570238   | 9.49         |
| CH <sub>2</sub>  | 2 <sup>3</sup> B <sub>2</sub> | 3a <sub>1</sub>                 | 4a <sub>1</sub>                 | 2.14 | -38.569633 | 10.74     | -38.559945 | 10.78      | -38.562591   | 10.75        | -38.521513   | 10.82        |
| CH <sub>2</sub>  | 1 <sup>5</sup> A <sub>2</sub> | 1b <sub>1</sub>                 | 4a <sub>1</sub>                 | 4.00 | -38.563825 | 10.89     | -38.557907 | 10.84      | -38.560582   | 10.80        | -38.525081   | 10.72        |
| CH <sub>2</sub>  | 2 <sup>1</sup> B <sub>1</sub> | 1b <sub>2</sub>                 | 2b <sub>1</sub>                 | 2.01 | -38.553940 | 11.16     | -38.544686 | 11.20      | -38.546592   | 11.18        | -38.504755   | 11.28        |
| CH <sub>2</sub>  | 1 <sup>5</sup> B <sub>2</sub> | 1b <sub>1</sub>                 | 2b <sub>1</sub>                 | 4.01 | -38.551050 | 11.24     | -38.545713 | 11.17      | -38.548158   | 11.14        | -38.515865   | 10.97        |
| CH <sub>2</sub>  | 2 <sup>3</sup> A <sub>2</sub> | 3a <sub>1</sub>                 | 2b <sub>1</sub>                 | 2.13 | -38.536589 | 11.63     | -38.523449 | 11.78      | -38.525541   | 11.75        | -38.482323   | 11.89        |
| CH <sub>2</sub>  | 2 <sup>1</sup> B <sub>2</sub> | 3a <sub>1</sub>                 | 4a <sub>1</sub>                 | 2.10 | -38.535515 | 11.66     | -38.526377 | 11.70      | -38.528615   | 11.67        | -38.488596   | 11.72        |
| CH <sub>2</sub>  | 2 <sup>1</sup> A <sub>2</sub> | 3a <sub>1</sub>                 | 2b <sub>1</sub>                 | 2.08 | -38.516084 | 12.19     | -38.503312 | 12.32      | -38.505157   | 12.31        | -38.462935   | 12.41        |
| CH <sub>2</sub>  | 3 <sup>3</sup> B <sub>1</sub> | 1b <sub>1</sub> 1b <sub>2</sub> | 3a <sub>1</sub> 4a <sub>1</sub> | 2.01 | -38.510059 | 12.36     | -38.499783 | 12.42      | -38.502429   | 12.38        | -38.456832   | 12.58        |

Table S5: Total energies  $E_X$  in a.u. and vertical excitation energies  $V_X$  in eV of di- and triatomic molecules ( $X = \text{FCI}, \text{IPEA}, \text{NOIPEA}, \text{NOIPEA}, \text{NOIPEA}$ ) calculated using the 6-311G basis set.

| Molecule | State         | Irrep    | Transition           | NOS  | $E_{\text{FCI}}$ | $V_{\text{FCI}}$ | $E_{\text{IPEA}}$ | $V_{\text{IPEA}}$ | $E_{\text{NOIPEA}}$ | $V_{\text{NOIPEA}}$ | $E_{\text{CASSCF}}$ | $V_{\text{CASSCF}}$ |
|----------|---------------|----------|----------------------|------|------------------|------------------|-------------------|-------------------|---------------------|---------------------|---------------------|---------------------|
| HLi      | $1^1\Sigma^+$ | $1^1A_1$ | ground state         | 0.22 | -8.019525        | 0.00             | -8.008866         | 0.00              | -8.009380           | 0.00                | -7.976628           | 0.00                |
| HLi      | $1^3\Sigma^+$ | $1^3A_1$ | $2\sigma^+$          | 2.00 | -7.915866        | 2.82             | -7.913407         | 2.60              | -7.913554           | 2.61                | -7.900877           | 2.06                |
| HLi      | $2^1\Sigma^+$ | $2^1A_1$ | $2\sigma^+$          | 1.88 | -7.900887        | 3.23             | -7.896243         | 3.06              | -7.896729           | 3.07                | -7.873119           | 2.82                |
| HLi      | $1^3\Pi$      | $1^3B_1$ | $2\sigma^+$          | 2.00 | -7.874773        | 3.94             | -7.874589         | 3.65              | -7.874662           | 3.67                | -7.873458           | 2.81                |
| HLi      | $1^1\Pi$      | $1^1B_1$ | $2\sigma^+$          | 2.00 | -7.863997        | 4.23             | -7.863756         | 3.95              | -7.863884           | 3.96                | -7.862313           | 3.11                |
| HLi      | $2^3\Sigma^+$ | $2^3A_1$ | $2\sigma^+$          | 2.00 | -7.819749        | 5.44             | -7.817281         | 5.21              | -7.817443           | 5.22                | -7.804795           | 4.68                |
| HLi      | $3^1\Sigma^+$ | $3^1A_1$ | $2\sigma^+$          | 1.90 | -7.797155        | 6.05             | -7.792357         | 5.89              | -7.792827           | 5.89                | -7.771721           | 5.58                |
| HBe      | $1^2\Sigma^+$ | $1^2A_1$ | ground state         | 1.00 | -15.188912       | 0.00             | -15.181397        | 0.00              | -15.182568          | 0.00                | -15.148608          | 0.00                |
| HBe      | $1^2\Pi$      | $1^2B_1$ | $3\sigma^+$          | 1.37 | -15.094608       | 2.57             | -15.090732        | 2.47              | -15.091060          | 2.49                | -15.071210          | 2.11                |
| HBe      | $2^2\Sigma^+$ | $2^2A_1$ | $2\sigma^+$          | 1.02 | -14.987453       | 5.48             | -14.982360        | 5.42              | -14.986846          | 5.33                | -14.946673          | 5.49                |
| HBe      | $1^4\Pi$      | $1^4B_1$ | $2\sigma^+$          | 3.00 | -14.979083       | 5.71             | -14.977960        | 5.54              | -14.978499          | 5.55                | -14.974104          | 4.75                |
| HBe      | $2^2\Pi$      | $2^2B_1$ | $2\sigma^+$          | 2.65 | -14.910144       | 7.59             | -14.905959        | 7.50              | -14.907101          | 7.50                | -14.885880          | 7.15                |
| HBe      | $1^4\Sigma^-$ | $1^4A_2$ | $2\sigma^+3\sigma^+$ | 1.01 | -14.919174       | 7.34             | -14.907424        | 7.46              | -14.909723          | 7.42                | -14.871138          | 7.55                |
| HBe      | $3^2\Sigma^+$ | $3^2A_1$ | $3\sigma^+$          | 3.00 | -14.881553       | 8.36             | -14.879776        | 8.21              | -14.880689          | 8.21                | -14.874441          | 7.46                |
| HB       | $1^1\Sigma^+$ | $1^1A_1$ | ground state         | 0.11 | -25.199770       | 0.00             | -25.189169        | 0.00              | -25.189772          | 0.00                | -25.147097          | 0.00                |
| HB       | $1^3\Pi$      | $1^3B_1$ | $3\sigma^+$          | 2.02 | -25.159726       | 1.09             | -25.154208        | 0.95              | -25.155051          | 0.94                | -25.124549          | 0.61                |
| HB       | $1^1\Pi$      | $1^1B_1$ | $3\sigma^+$          | 2.05 | -25.088064       | 3.04             | -25.080915        | 2.95              | -25.082466          | 2.92                | -25.043467          | 2.82                |
| HB       | $1^3\Sigma^-$ | $1^3A_2$ | $3\sigma^+3\sigma^+$ | 2.15 | -25.038621       | 4.39             | -25.033999        | 4.22              | -25.035138          | 4.21                | -25.007077          | 3.81                |
| HB       | $1^1\Delta$   | $1^1A_2$ | $3\sigma^+3\sigma^+$ | 2.00 | -24.970999       | 6.23             | -24.964122        | 6.12              | -24.965761          | 6.10                | -24.934039          | 5.80                |
| HB       | $1^1\Delta$   | $2^1A_1$ | $3\sigma^+3\sigma^+$ | 0.00 | -24.970999       | 6.23             | -24.960390        | 6.23              | -24.961733          | 6.21                | -24.919478          | 6.19                |
| HB       | $1^5\Sigma^-$ | $1^5A_2$ | $2\sigma^+3\sigma^+$ | 0.01 | -24.931300       | 7.31             | -24.928980        | 7.08              | -24.930573          | 7.05                | -24.916775          | 6.27                |
| HB       | $2^1\Sigma^+$ | $3^1A_1$ | $3\sigma^+3\sigma^+$ | 4.00 | -24.936058       | 7.18             | -24.923778        | 7.22              | -24.925952          | 7.18                | -24.874066          | 7.43                |
| HB       | $1^3\Sigma^+$ | $1^3A_1$ | $3\sigma^+$          | 2.00 | -24.929269       | 7.36             | -24.921568        | 7.28              | -24.923300          | 7.25                | -24.889724          | 7.00                |
| HB       | $2^3\Pi$      | $2^3B_1$ | $2\sigma^+$          | 2.03 | -24.900487       | 8.14             | -24.894290        | 8.02              | -24.896148          | 7.99                | -24.862312          | 7.75                |

Table S5: . . . continued

| Molecule | State         | Irrep    | Transition           | NOS         | $E_{\text{FCI}}$ | $V_{\text{FCI}}$ | $E_{\text{IPEA}}$ | $V_{\text{IPEA}}$ | $E_{\text{NOIPEA}}$ | $V_{\text{NOIPEA}}$ | $E_{\text{CASSCF}}$ | $V_{\text{CASSCF}}$ |       |
|----------|---------------|----------|----------------------|-------------|------------------|------------------|-------------------|-------------------|---------------------|---------------------|---------------------|---------------------|-------|
| HB       | $3^1\Sigma^+$ | $4^1A_1$ | $3\sigma^+$          | $4\sigma^+$ | 1.91             | -24.883969       | 8.59              | -24.872520        | 8.62                | -24.875171          | 8.56                | -24.818320          | 8.95  |
| HB       | $2^1\Pi$      | $2^1B_1$ | $2\sigma^+$          | $1\pi$      | 2.02             | -24.815943       | 10.44             | -24.806707        | 10.41               | -24.811981          | 10.28               | -24.765031          | 10.40 |
| HC       | $1^2\Pi$      | $1^2B_1$ | ground state         |             | 1.07             | -38.349309       | 0.00              | -38.336003        | 0.00                | -38.337317          | 0.00                | -38.275819          | 0.00  |
| HC       | $1^4\Sigma^-$ | $1^4A_2$ | $3\sigma^+$          | $1\pi$      | 3.04             | -38.342789       | 0.18              | -38.336576        | -0.02               | -38.338433          | -0.03               | -38.292475          | -0.45 |
| HC       | $1^2\Delta$   | $1^2A_1$ | $3\sigma^+$          | $1\pi$      | 1.02             | -38.236552       | 3.07              | -38.226589        | 2.98                | -38.229150          | 2.94                | -38.170730          | 2.86  |
| HC       | $1^2\Delta$   | $1^2A_2$ | $3\sigma^+$          | $1\pi$      | 3.02             | -38.236552       | 3.07              | -38.225745        | 3.00                | -38.228600          | 2.96                | -38.168457          | 2.92  |
| HC       | $1^2\Sigma^-$ | $2^2A_2$ | $3\sigma^+$          | $1\pi$      | 3.04             | -38.226197       | 3.35              | -38.212932        | 3.35                | -38.215508          | 3.31                | -38.154477          | 3.30  |
| HC       | $1^2\Sigma^+$ | $2^2A_1$ | $3\sigma^+$          | $1\pi$      | 1.02             | -38.206148       | 3.90              | -38.195205        | 3.83                | -38.198482          | 3.78                | -38.133316          | 3.88  |
| HC       | $2^2\Pi$      | $2^2B_2$ | $3\sigma^+3\sigma^+$ | $1\pi1\pi$  | 1.02             | -38.088072       | 7.11              | -38.071696        | 7.19                | -38.074576          | 7.15                | -38.011136          | 7.20  |
| HC       | $2^2\Sigma^+$ | $3^2A_1$ | $1\pi$               | $4\sigma^+$ | 1.05             | -38.067742       | 7.66              | -38.053877        | 7.68                | -38.055308          | 7.67                | -37.990502          | 7.76  |
| HC       | $1^4\Pi$      | $1^4B_1$ | $3\sigma^+$          | $4\sigma^+$ | 3.00             | -38.062593       | 7.80              | -38.052218        | 7.72                | -38.055270          | 7.67                | -37.999093          | 7.53  |
| HC       | $2^4\Sigma^-$ | $2^4A_2$ | $2\sigma^+$          | $1\pi$      | 2.97             | -38.019818       | 8.97              | -38.010526        | 8.86                | -38.016315          | 8.73                | -37.949519          | 8.88  |
| HC       | $3^2\Pi$      | $3^2B_1$ | $3\sigma^+$          | $4\sigma^+$ | 3.00             | -38.019341       | 8.98              | -38.012340        | 8.81                | -38.014605          | 8.78                | -37.965427          | 8.45  |
| HC       | $4^2\Pi$      | $4^2B_1$ | $3\sigma^+$          | $4\sigma^+$ | 2.98             | -37.975552       | 10.17             | -37.964508        | 10.11               | -37.970366          | 9.99                | -37.897205          | 10.30 |
| HC       | $2^2\Delta$   | $3^2A_2$ | $2\sigma^+$          | $1\pi$      | 3.10             | -37.900296       | 12.22             | -37.884264        | 12.29               | -37.889596          | 12.18               | -37.827281          | 12.21 |
| HC       | $2^2\Delta$   | $4^2A_1$ | $2\sigma^+$          | $1\pi$      | 1.03             | -37.899935       | 12.23             | -37.889291        | 12.16               | -37.894467          | 12.05               | -37.828648          | 12.17 |
| HC       | $2^4\Pi$      | $2^4B_1$ | $2\sigma^+3\sigma^+$ | $1\pi1\pi$  | 3.00             | -37.894545       | 12.37             | -37.875407        | 12.53               | -37.878097          | 12.50               | -37.812894          | 12.60 |
| HN       | $1^3\Sigma^-$ | $1^3A_2$ | ground state         |             | 2.07             | -55.050698       | 0.00              | -55.035506        | 0.00                | -55.037980          | 0.00                | -54.947422          | 0.00  |
| HN       | $1^1\Delta$   | $1^1A_1$ | ground state         |             | 0.01             | -54.978984       | 1.95              | -54.967201        | 1.86                | -54.969088          | 1.87                | -54.884667          | 1.71  |
| HN       | $1^1\Delta$   | $1^1A_2$ | ground state         |             | 2.05             | -54.978984       | 1.95              | -54.964735        | 1.93                | -54.967082          | 1.93                | -54.877093          | 1.91  |
| HN       | $1^1\Sigma^+$ | $2^1A_1$ | ground state         |             | 0.04             | -54.951915       | 2.69              | -54.940357        | 2.59                | -54.942677          | 2.59                | -54.853899          | 2.54  |
| HN       | $1^3\Pi$      | $1^3B_1$ | $3\sigma^+$          | $1\pi$      | 2.01             | -54.912005       | 3.77              | -54.900307        | 3.68                | -54.902356          | 3.69                | -54.818309          | 3.51  |
| HN       | $1^1\Pi$      | $1^1B_2$ | $3\sigma^+$          | $1\pi$      | 2.02             | -54.833399       | 5.91              | -54.819617        | 5.87                | -54.822150          | 5.87                | -54.725812          | 6.03  |
| HN       | $1^5\Sigma^-$ | $1^5A_2$ | $3\sigma^+$          | $4\sigma^+$ | 4.00             | -54.743934       | 8.35              | -54.734885        | 8.18                | -54.737534          | 8.18                | -54.675175          | 7.41  |
| HN       | $2^3\Pi$      | $2^3B_2$ | $1\pi$               | $4\sigma^+$ | 2.01             | -54.721808       | 8.95              | -54.706648        | 8.95                | -54.709494          | 8.94                | -54.632579          | 8.57  |

Table S5: . . . continued

| Molecule | State         | Irrep    | Transition           | NOS          | $E_{\text{FCI}}$ | $V_{\text{FCI}}$ | $E_{\text{IPEA}}$ | $V_{\text{IPEA}}$ | $E_{\text{NOIPEA}}$ | $V_{\text{NOIPEA}}$ | $E_{\text{CASSCF}}$ | $V_{\text{CASSCF}}$ |       |
|----------|---------------|----------|----------------------|--------------|------------------|------------------|-------------------|-------------------|---------------------|---------------------|---------------------|---------------------|-------|
| HN       | $2^1\Pi$      | $2^1B_1$ | $1\pi$               | $4\sigma^+$  | 2.01             | -54.701452       | 9.50              | -54.690247        | 9.39                | -54.692066          | 9.41                | -54.619553          | 8.92  |
| HN       | $2^3\Sigma^-$ | $2^3A_2$ | $3\sigma^+$          | $4\sigma^+$  | 3.97             | -54.688470       | 9.86              | -54.683484        | 9.58                | -54.689662          | 9.48                | -54.603467          | 9.36  |
| HN       | $2^1\Sigma^+$ | $3^1A_1$ | $3\sigma^+3\sigma^+$ | $1\pi1\pi$   | 0.00             | -54.637114       | 11.25             | -54.608181        | 11.63               | -54.608771          | 11.68               | -54.535435          | 11.21 |
| HN       | $1^3\Delta$   | $3^3A_2$ | $3\sigma^+$          | $4\sigma^+$  | 2.00             | -54.616175       | 11.82             | -54.606128        | 11.68               | -54.609005          | 11.67               | -54.540362          | 11.08 |
| HN       | $1^3\Delta$   | $1^3A_1$ | $3\sigma^+$          | $4\sigma^+$  | 4.00             | -54.616175       | 11.82             | -54.607636        | 11.64               | -54.610523          | 11.63               | -54.544474          | 10.96 |
| HN       | $1^1\Sigma^-$ | $2^1A_2$ | $3\sigma^+$          | $4\sigma^+$  | 3.99             | -54.599066       | 12.29             | -54.588597        | 12.16               | -54.592179          | 12.13               | -54.515630          | 11.75 |
| HN       | $3^3\Sigma^-$ | $4^3A_2$ | $3\sigma^+$          | $4\sigma^+$  | 4.00             | -54.608475       | 12.03             | -54.600166        | 11.85               | -54.606414          | 11.74               | -54.512218          | 11.84 |
| HN       | $1^3\Sigma^+$ | $2^3A_1$ | $3\sigma^+$          | $4\sigma^+$  | 2.00             | -54.582021       | 12.75             | -54.572588        | 12.60               | -54.576404          | 12.56               | -54.506728          | 11.99 |
| HN       | $2^1\Delta$   | $4^1A_1$ | $3\sigma^+$          | $4\sigma^+$  | 1.97             | -54.564507       | 13.23             | -54.562388        | 12.87               | -54.568394          | 12.78               | -54.455647          | 13.38 |
| HN       | $2^1\Delta$   | $3^1A_2$ | $3\sigma^+$          | $4\sigma^+$  | 4.00             | -54.564507       | 13.23             | -54.554585        | 13.09               | -54.560051          | 13.01               | -54.467007          | 13.07 |
| HN       | $3^3\Pi$      | $3^3B_2$ | $2\sigma^+$          | $1\pi$       | 2.05             | -54.507656       | 14.78             | -54.488045        | 14.90               | -54.492786          | 14.84               | -54.404541          | 14.77 |
| HO       | $1^2\Pi$      | $1^2B_1$ | ground state         | ground state | 1.05             | -75.513547       | 0.00              | -75.500605        | 0.00                | -75.502476          | 0.00                | -75.377434          | 0.00  |
| HO       | $1^2\Sigma^+$ | $1^2A_1$ | $3\sigma^+$          | $1\pi$       | 1.01             | -75.356521       | 4.27              | -75.344103        | 4.26                | -75.345906          | 4.26                | -75.214952          | 4.42  |
| HO       | $1^4\Sigma^-$ | $1^4A_2$ | $1\pi$               | $4\sigma^+$  | 3.00             | -75.244126       | 7.33              | -75.234490        | 7.24                | -75.236625          | 7.23                | -75.148526          | 6.23  |
| HO       | $1^2\Sigma^-$ | $1^2A_2$ | $1\pi$               | $4\sigma^+$  | 3.00             | -75.213407       | 8.17              | -75.203770        | 8.08                | -75.205994          | 8.07                | -75.119931          | 7.01  |
| HO       | $1^2\Delta$   | $2^2A_2$ | $1\pi$               | $4\sigma^+$  | 1.00             | -75.144838       | 10.03             | -75.134241        | 9.97                | -75.136025          | 9.97                | -75.051331          | 8.87  |
| HO       | $1^2\Delta$   | $2^2A_1$ | $1\pi$               | $4\sigma^+$  | 3.00             | -75.144838       | 10.03             | -75.138889        | 9.84                | -75.141274          | 9.83                | -75.043344          | 9.09  |
| HO       | $1^4\Pi$      | $1^4B_1$ | $3\sigma^+$          | $4\sigma^+$  | 3.00             | -75.119819       | 10.71             | -75.110659        | 10.61               | -75.112770          | 10.60               | -75.026355          | 9.55  |
| HO       | $2^2\Sigma^+$ | $3^2A_1$ | $1\pi$               | $4\sigma^+$  | 1.01             | -75.107689       | 11.04             | -75.100926        | 10.88               | -75.103839          | 10.85               | -75.004859          | 10.14 |
| HO       | $2^2\Pi$      | $2^2B_1$ | $3\sigma^+$          | $4\sigma^+$  | 2.97             | -75.064207       | 12.23             | -75.060923        | 11.96               | -75.066276          | 11.87               | -74.953524          | 11.54 |
| HO       | $3^2\Pi$      | $3^2B_2$ | $3\sigma^+$          | $4\sigma^+$  | 2.98             | -75.011088       | 13.67             | -75.004930        | 13.49               | -75.010699          | 13.38               | -74.889308          | 13.28 |
| HF       | $1^1\Sigma^+$ | $1^1A_1$ | ground state         | ground state | 0.04             | -100.184748      | 0.00              | -100.177462       | 0.00                | -100.178190         | 0.00                | -100.012638         | 0.00  |
| HF       | $1^3\Pi$      | $1^3B_1$ | $1\pi$               | $4\sigma^+$  | 2.00             | -99.823124       | 9.84              | -99.816575        | 9.82                | -99.817932          | 9.80                | -99.701075          | 8.48  |
| HF       | $1^1\Pi$      | $1^1B_1$ | $1\pi$               | $4\sigma^+$  | 2.00             | -99.802707       | 10.40             | -99.796210        | 10.37               | -99.797337          | 10.36               | -99.682561          | 8.98  |
| HF       | $1^3\Sigma^+$ | $1^3A_1$ | $3\sigma^+$          | $4\sigma^+$  | 2.00             | -99.700137       | 13.19             | -99.693806        | 13.16               | -99.695076          | 13.15               | -99.579371          | 11.79 |

Table S5: . . . continued

| Molecule        | State           | Irrep       | Transition            | NOS  | $E_{FCI}$  | $V_{FCI}$ | $E_{IPEA}$ | $V_{IPEA}$ | $E_{NOIPEA}$ | $V_{NOIPEA}$ | $E_{CASSCF}$ | $V_{CASSCF}$ |
|-----------------|-----------------|-------------|-----------------------|------|------------|-----------|------------|------------|--------------|--------------|--------------|--------------|
| HF              | $2^1\Sigma^+$   | $2^1A_1$    | $3\sigma^+$           | 1.96 | -99.631024 | 15.07     | -99.634277 | 14.78      | -99.637086   | 14.72        | -99.476288   | 14.59        |
| Li <sub>2</sub> | $1^1\Sigma_g^+$ | $1^1A_g$    | ground state          | 0.05 | -14.896800 | 0.00      | -14.895173 | 0.00       | -14.895293   | 0.00         | -14.893272   | 0.00         |
| Li <sub>2</sub> | $1^3\Sigma_u^+$ | $1^3B_{1u}$ | $2\sigma_g^+$         | 2.00 | -14.851911 | 1.22      | -14.851897 | 1.18       | -14.851902   | 1.18         | -14.851853   | 1.13         |
| Li <sub>2</sub> | $1^3\Pi_u$      | $1^3B_{3u}$ | $2\sigma_g^+$         | 2.00 | -14.845424 | 1.40      | -14.845112 | 1.36       | -14.845235   | 1.36         | -14.844494   | 1.33         |
| Li <sub>2</sub> | $1^1\Sigma_u^+$ | $1^1B_{1u}$ | $2\sigma_g^+$         | 2.00 | -14.831347 | 1.78      | -14.831320 | 1.74       | -14.831333   | 1.74         | -14.831219   | 1.69         |
| Li <sub>2</sub> | $2^1\Sigma_g^+$ | $2^1A_g$    | $2\sigma_g^+$         | 1.52 | -14.794525 | 2.78      | -14.793932 | 2.75       | -14.794257   | 2.75         | -14.791643   | 2.77         |
| Li <sub>2</sub> | $1^1\Pi_u$      | $1^1B_{3u}$ | $2\sigma_g^+$         | 2.00 | -14.795177 | 2.77      | -14.794727 | 2.73       | -14.794841   | 2.73         | -14.794168   | 2.70         |
| B <sub>2</sub>  | $1^3\Sigma_g^-$ | $1^3B_{1g}$ | ground state          | 2.13 | -49.232489 | 0.00      | -49.226833 | 0.00       | -49.228720   | 0.00         | -49.205717   | 0.00         |
| B <sub>2</sub>  | $1^5\Sigma_u^-$ | $1^5A_u$    | $2\sigma_u^+$         | 4.00 | -49.232036 | 0.01      | -49.227606 | -0.02      | -49.229311   | -0.02        | -49.209203   | -0.09        |
| B <sub>2</sub>  | $1^1\Delta_g$   | $1^1A_g$    | ground state          | 2.12 | -49.206820 | 0.70      | -49.200764 | 0.71       | -49.202676   | 0.71         | -49.177326   | 0.77         |
| B <sub>2</sub>  | $1^1\Delta_g$   | $1^1B_{1g}$ | ground state          | 0.25 | -49.206820 | 0.70      | -49.201507 | 0.69       | -49.203347   | 0.69         | -49.181033   | 0.67         |
| B <sub>2</sub>  | $1^3\Pi_u$      | $1^3B_{2u}$ | $1\pi_u$              | 2.09 | -49.204744 | 0.75      | -49.197420 | 0.80       | -49.199513   | 0.79         | -49.173085   | 0.89         |
| B <sub>2</sub>  | $1^1\Sigma_u^+$ | $2^1A_g$    | ground state          | 0.26 | -49.199845 | 0.89      | -49.193755 | 0.90       | -49.196003   | 0.89         | -49.168967   | 1.00         |
| B <sub>2</sub>  | $1^3\Delta_u$   | $1^3A_u$    | $2\sigma_u^+$         | 3.87 | -49.172011 | 1.65      | -49.166385 | 1.64       | -49.169094   | 1.62         | -49.144988   | 1.65         |
| B <sub>2</sub>  | $1^3\Delta_u$   | $1^3B_{1u}$ | $2\sigma_u^+$         | 2.01 | -49.172011 | 1.65      | -49.166321 | 1.65       | -49.168966   | 1.63         | -49.145086   | 1.65         |
| B <sub>2</sub>  | $1^1\Pi_u$      | $1^1B_{3u}$ | $1\pi_u$              | 2.15 | -49.168925 | 1.73      | -49.161183 | 1.79       | -49.163288   | 1.78         | -49.132370   | 2.00         |
| B <sub>2</sub>  | $1^3\Sigma_u^+$ | $2^3B_{1u}$ | $2\sigma_u^+$         | 2.01 | -49.163055 | 1.89      | -49.157243 | 1.89       | -49.160253   | 1.86         | -49.133952   | 1.95         |
| B <sub>2</sub>  | $1^3\Sigma_u^-$ | $2^3A_u$    | $2\sigma_u^+$         | 3.84 | -49.162030 | 1.92      | -49.155022 | 1.95       | -49.158414   | 1.91         | -49.128475   | 2.10         |
| B <sub>2</sub>  | $1^3\Pi_g$      | $1^3B_{3g}$ | $2\sigma_u^+$         | 2.13 | -49.153676 | 2.14      | -49.147536 | 2.16       | -49.149724   | 2.15         | -49.123749   | 2.23         |
| B <sub>2</sub>  | $2^1\Sigma_g^+$ | $3^1A_g$    | $1\pi_u, 1\pi_u$      | 0.27 | -49.151624 | 2.20      | -49.142402 | 2.30       | -49.143306   | 2.32         | -49.114850   | 2.47         |
| B <sub>2</sub>  | $2^3\Pi_g$      | $2^3B_{3g}$ | $2\sigma_u^+, 1\pi_u$ | 2.02 | -49.125985 | 2.90      | -49.118925 | 2.94       | -49.121632   | 2.91         | -49.092925   | 3.07         |
| B <sub>2</sub>  | $1^1\Pi_g$      | $1^1B_{3g}$ | $2\sigma_u^+$         | 2.16 | -49.105724 | 3.45      | -49.099466 | 3.47       | -49.101408   | 3.46         | -49.077355   | 3.49         |
| C <sub>2</sub>  | $1^1\Sigma_g^+$ | $1^1A_g$    | ground state          | 0.39 | -75.663343 | 0.00      | -75.656204 | 0.00       | -75.658234   | 0.00         | -75.605670   | 0.00         |
| C <sub>2</sub>  | $1^3\Pi_u$      | $1^3B_{3u}$ | $1\pi_u$              | 2.08 | -75.636970 | 0.72      | -75.626982 | 0.80       | -75.629364   | 0.79         | -75.578616   | 0.74         |
| C <sub>2</sub>  | $1^3\Sigma_u^+$ | $1^3B_{1u}$ | $2\sigma_u^+$         | 2.09 | -75.623521 | 1.08      | -75.615851 | 1.10       | -75.618458   | 1.08         | -75.572586   | 0.90         |

Table S5: . . . continued

| Molecule         | State           | Irrep       | Transition          | NOS  | $E_{\text{FCI}}$ | $V_{\text{FCI}}$ | $E_{\text{IPEA}}$ | $V_{\text{IPEA}}$ | $E_{\text{NOIPEA}}$ | $V_{\text{NOIPEA}}$ | $E_{\text{CASSCF}}$ | $V_{\text{CASSCF}}$ |
|------------------|-----------------|-------------|---------------------|------|------------------|------------------|-------------------|-------------------|---------------------|---------------------|---------------------|---------------------|
| C <sub>2</sub>   | $1^1\Pi_u$      | $1^1B_{3u}$ | $1\pi_u$            | 2.10 | -75.588328       | 2.04             | -75.577725        | 2.14              | -75.579989          | 2.13                | -75.525050          | 2.19                |
| C <sub>2</sub>   | $1^3\Sigma_g^-$ | $1^3B_{1g}$ | $1\pi_u1\pi_u$      | 2.04 | -75.580534       | 2.25             | -75.569208        | 2.37              | -75.570831          | 2.38                | -75.519233          | 2.35                |
| C <sub>2</sub>   | $1^3\Pi_g$      | $1^3B_{2g}$ | $2\sigma_u^+1\pi_u$ | 2.13 | -75.559146       | 2.84             | -75.549956        | 2.89              | -75.552596          | 2.87                | -75.501314          | 2.84                |
| C <sub>2</sub>   | $2^1\Sigma_g^+$ | $2^1A_g$    | $1\pi_u1\pi_u$      | 0.20 | -75.551164       | 3.05             | -75.540804        | 3.14              | -75.542960          | 3.14                | -75.491196          | 3.11                |
| C <sub>2</sub>   | $1^1\Delta_g$   | $3^1A_g$    | $1\pi_u1\pi_u$      | 0.05 | -75.546792       | 3.17             | -75.535610        | 3.28              | -75.537095          | 3.30                | -75.485943          | 3.26                |
| C <sub>2</sub>   | $1^1\Delta_g$   | $1^1B_{1g}$ | $1\pi_u1\pi_u$      | 2.04 | -75.546792       | 3.17             | -75.536225        | 3.26              | -75.537705          | 3.28                | -75.487297          | 3.22                |
| C <sub>2</sub>   | $1^5\Sigma_g^+$ | $1^5A_g$    | $2\sigma_u^+1\pi_u$ | 4.00 | -75.474912       | 5.13             | -75.469035        | 5.09              | -75.472885          | 5.04                | -75.420502          | 5.04                |
| C <sub>2</sub>   | $1^1\Pi_g$      | $1^1B_{2g}$ | $2\sigma_u^+1\pi_u$ | 2.23 | -75.470425       | 5.25             | -75.459037        | 5.37              | -75.461867          | 5.34                | -75.404184          | 5.48                |
| C <sub>2</sub>   | $1^5\Pi_g$      | $1^5B_{2g}$ | $1\pi_u1\pi_u$      | 4.01 | -75.435562       | 6.20             | -75.425234        | 6.29              | -75.428676          | 6.25                | -75.374174          | 6.30                |
| N <sub>2</sub>   | $1^1\Sigma_g^+$ | $1^1A_g$    | ground state        | 0.13 | -109.145744      | 0.00             | -109.133354       | 0.00              | -109.134153         | 0.00                | -109.056141         | 0.00                |
| N <sub>2</sub>   | $1^3\Sigma_u^+$ | $1^3B_{1u}$ | $1\pi_u$            | 2.01 | -108.861273      | 7.74             | -108.849438       | 7.73              | -108.852428         | 7.67                | -108.757450         | 8.13                |
| N <sub>2</sub>   | $1^3\Pi_g$      | $1^3B_{2g}$ | $3\sigma_g^+$       | 2.08 | -108.855871      | 7.89             | -108.843218       | 7.90              | -108.846363         | 7.83                | -108.749186         | 8.35                |
| N <sub>2</sub>   | $1^1\Pi_g$      | $1^1B_{2g}$ | $3\sigma_g^+$       | 2.07 | -108.810681      | 9.12             | -108.798263       | 9.12              | -108.801119         | 9.06                | -108.703573         | 9.59                |
| N <sub>2</sub>   | $1^3\Delta_u$   | $1^3A_u$    | $1\pi_u$            | 2.00 | -108.806085      | 9.24             | -108.794039       | 9.23              | -108.797084         | 9.17                | -108.700655         | 9.67                |
| N <sub>2</sub>   | $1^3\Delta_u$   | $2^3B_{1u}$ | $1\pi_u$            | 2.01 | -108.806085      | 9.24             | -108.793907       | 9.24              | -108.797060         | 9.17                | -108.700540         | 9.68                |
| N <sub>2</sub>   | $1^3\Sigma_u^-$ | $2^3A_u$    | $1\pi_u$            | 2.04 | -108.784985      | 9.82             | -108.772947       | 9.81              | -108.776508         | 9.73                | -108.675957         | 10.35               |
| N <sub>2</sub>   | $1^1\Sigma_u^-$ | $1^1A_u$    | $1\pi_u$            | 2.00 | -108.758765      | 10.53            | -108.747145       | 10.51             | -108.749983         | 10.45               | -108.651369         | 11.01               |
| N <sub>2</sub>   | $1^1\Delta_u$   | $1^1B_{1u}$ | $1\pi_u$            | 2.04 | -108.749856      | 10.77            | -108.738320       | 10.75             | -108.741559         | 10.68               | -108.639979         | 11.32               |
| N <sub>2</sub>   | $1^1\Delta_u$   | $2^1A_u$    | $1\pi_u$            | 2.00 | -108.749856      | 10.77            | -108.737743       | 10.77             | -108.741535         | 10.68               | -108.640038         | 11.32               |
| N <sub>2</sub>   | $1^3\Pi_u$      | $1^3B_{3u}$ | $2\sigma_u^+$       | 2.16 | -108.742842      | 10.96            | -108.730574       | 10.96             | -108.734154         | 10.88               | -108.633680         | 11.50               |
| N <sub>2</sub>   | $1^1\Pi_u$      | $1^1B_{3u}$ | $2\sigma_u^+$       | 2.17 | -108.654522      | 13.37            | -108.641368       | 13.39             | -108.645137         | 13.31               | -108.544680         | 13.92               |
| H <sub>2</sub> O | $1^1A_1$        | $1^1A_1$    | ground state        | 0.03 | -76.157900       | 0.00             | -76.146217        | 0.00              | -76.146724          | 0.00                | -76.032496          | 0.00                |
| H <sub>2</sub> O | $1^3B_1$        | $1^3B_1$    | $1b_1$              | 2.00 | -75.897447       | 7.09             | -75.887157        | 7.05              | -75.889311          | 7.00                | -75.796368          | 6.43                |
| H <sub>2</sub> O | $1^1B_1$        | $1^1B_1$    | $1b_1$              | 2.01 | -75.875183       | 7.69             | -75.865487        | 7.64              | -75.867384          | 7.60                | -75.775806          | 6.98                |
| H <sub>2</sub> O | $1^3A_1$        | $1^3A_1$    | $3a_1$              | 2.00 | -75.816009       | 9.30             | -75.806348        | 9.25              | -75.808379          | 9.21                | -75.716269          | 8.60                |

Table S5: . . . continued

| Molecule         | State                         | Irrep                           | Transition                      | NOS  | E <sub>FCI</sub> | V <sub>FCI</sub> | E <sub>IPEA</sub> | V <sub>IPEA</sub> | E <sub>NOIPEA</sub> | V <sub>NOIPEA</sub> | E <sub>CASSCF</sub> | V <sub>CASSCF</sub> |
|------------------|-------------------------------|---------------------------------|---------------------------------|------|------------------|------------------|-------------------|-------------------|---------------------|---------------------|---------------------|---------------------|
| H <sub>2</sub> O | 1 <sup>3</sup> A <sub>2</sub> | 1b <sub>1</sub>                 | 2b <sub>2</sub>                 | 2.00 | -75.809666       | 9.48             | -75.799127        | 9.44              | -75.801235          | 9.40                | -75.707713          | 8.84                |
| H <sub>2</sub> O | 1 <sup>1</sup> A <sub>2</sub> | 1b <sub>1</sub>                 | 2b <sub>2</sub>                 | 2.00 | -75.794848       | 9.88             | -75.785428        | 9.82              | -75.787308          | 9.78                | -75.695509          | 9.17                |
| H <sub>2</sub> O | 2 <sup>1</sup> A <sub>1</sub> | 3a <sub>1</sub>                 | 4a <sub>1</sub>                 | 2.00 | -75.788427       | 10.05            | -75.782363        | 9.90              | -75.784904          | 9.85                | -75.676197          | 9.70                |
| H <sub>2</sub> O | 1 <sup>3</sup> B <sub>2</sub> | 3a <sub>1</sub>                 | 2b <sub>2</sub>                 | 2.00 | -75.737527       | 11.44            | -75.728983        | 11.35             | -75.731478          | 11.30               | -75.622299          | 11.16               |
| H <sub>2</sub> O | 1 <sup>1</sup> B <sub>2</sub> | 3a <sub>1</sub>                 | 2b <sub>2</sub>                 | 2.00 | -75.707317       | 12.26            | -75.698328        | 12.19             | -75.700243          | 12.15               | -75.602023          | 11.71               |
| H <sub>2</sub> O | 2 <sup>3</sup> B <sub>2</sub> | 1b <sub>2</sub>                 | 4a <sub>1</sub>                 | 2.00 | -75.664811       | 13.42            | -75.655141        | 13.36             | -75.657964          | 13.30               | -75.548573          | 13.17               |
| CH <sub>2</sub>  | 1 <sup>3</sup> B <sub>2</sub> | ground state                    |                                 | 2.02 | -38.977380       | 0.00             | -38.966975        | 0.00              | -38.968703          | 0.00                | -38.921047          | 0.00                |
| CH <sub>2</sub>  | 1 <sup>1</sup> A <sub>1</sub> | 1b <sub>2</sub>                 | 3a <sub>1</sub>                 | 0.04 | -38.959383       | 0.49             | -38.946559        | 0.56              | -38.947187          | 0.59                | -38.898387          | 0.62                |
| CH <sub>2</sub>  | 1 <sup>1</sup> B <sub>2</sub> | ground state                    |                                 | 2.02 | -38.896701       | 2.20             | -38.884203        | 2.25              | -38.886493          | 2.24                | -38.830811          | 2.46                |
| CH <sub>2</sub>  | 2 <sup>1</sup> A <sub>1</sub> | 3a <sub>1</sub>                 | 1b <sub>2</sub>                 | 0.04 | -38.799468       | 4.84             | -38.786452        | 4.91              | -38.787188          | 4.94                | -38.735241          | 5.06                |
| CH <sub>2</sub>  | 1 <sup>3</sup> A <sub>2</sub> | 1b <sub>1</sub>                 | 3a <sub>1</sub>                 | 2.04 | -38.770184       | 5.64             | -38.759547        | 5.64              | -38.761615          | 5.64                | -38.709404          | 5.76                |
| CH <sub>2</sub>  | 1 <sup>1</sup> A <sub>2</sub> | 1b <sub>1</sub>                 | 3a <sub>1</sub>                 | 2.05 | -38.744982       | 6.32             | -38.735063        | 6.31              | -38.737310          | 6.30                | -38.682038          | 6.50                |
| CH <sub>2</sub>  | 1 <sup>3</sup> B <sub>1</sub> | 1b <sub>1</sub>                 | 1b <sub>2</sub>                 | 2.00 | -38.718364       | 7.05             | -38.706121        | 7.10              | -38.708936          | 7.07                | -38.644812          | 7.52                |
| CH <sub>2</sub>  | 1 <sup>3</sup> A <sub>1</sub> | 1b <sub>2</sub>                 | 4a <sub>1</sub>                 | 2.00 | -38.708694       | 7.31             | -38.698555        | 7.30              | -38.700548          | 7.30                | -38.659377          | 7.12                |
| CH <sub>2</sub>  | 1 <sup>1</sup> B <sub>1</sub> | 1b <sub>1</sub>                 | 1b <sub>2</sub>                 | 2.01 | -38.662964       | 8.56             | -38.652786        | 8.55              | -38.655794          | 8.51                | -38.596097          | 8.84                |
| CH <sub>2</sub>  | 3 <sup>1</sup> A <sub>1</sub> | 1b <sub>2</sub>                 | 4a <sub>1</sub>                 | 2.01 | -38.691490       | 7.78             | -38.680715        | 7.79              | -38.683132          | 7.77                | -38.629911          | 7.92                |
| CH <sub>2</sub>  | 2 <sup>3</sup> B <sub>1</sub> | 1b <sub>2</sub>                 | 2b <sub>1</sub>                 | 2.00 | -38.659327       | 8.65             | -38.646577        | 8.72              | -38.649304          | 8.69                | -38.593935          | 8.90                |
| CH <sub>2</sub>  | 2 <sup>3</sup> B <sub>2</sub> | 3a <sub>1</sub>                 | 4a <sub>1</sub>                 | 2.07 | -38.625742       | 9.57             | -38.614380        | 9.59              | -38.617230          | 9.56                | -38.569138          | 9.58                |
| CH <sub>2</sub>  | 1 <sup>5</sup> A <sub>2</sub> | 1b <sub>1</sub>                 | 4a <sub>1</sub>                 | 2.00 | -38.610558       | 9.98             | -38.602758        | 9.91              | -38.606209          | 9.86                | -38.562830          | 9.75                |
| CH <sub>2</sub>  | 2 <sup>1</sup> B <sub>1</sub> | 1b <sub>2</sub>                 | 2b <sub>1</sub>                 | 4.00 | -38.620301       | 9.72             | -38.609064        | 9.74              | -38.612266          | 9.70                | -38.557666          | 9.89                |
| CH <sub>2</sub>  | 1 <sup>5</sup> B <sub>2</sub> | 1b <sub>1</sub>                 | 2b <sub>1</sub>                 | 2.08 | -38.579548       | 10.83            | -38.572918        | 10.72             | -38.576037          | 10.68               | -38.536998          | 10.45               |
| CH <sub>2</sub>  | 2 <sup>3</sup> A <sub>2</sub> | 3a <sub>1</sub>                 | 2b <sub>1</sub>                 | 4.01 | -38.577934       | 10.87            | -38.559070        | 11.10             | -38.561979          | 11.07               | -38.508787          | 11.22               |
| CH <sub>2</sub>  | 2 <sup>1</sup> B <sub>2</sub> | 3a <sub>1</sub>                 | 4a <sub>1</sub>                 | 2.07 | -38.605222       | 10.13            | -38.594830        | 10.13             | -38.597487          | 10.10               | -38.549094          | 10.12               |
| CH <sub>2</sub>  | 2 <sup>1</sup> A <sub>2</sub> | 3a <sub>1</sub>                 | 2b <sub>1</sub>                 | 2.01 | -38.559576       | 11.37            | -38.544116        | 11.51             | -38.546883          | 11.48               | -38.493317          | 11.64               |
| CH <sub>2</sub>  | 3 <sup>3</sup> B <sub>1</sub> | 1b <sub>1</sub> 1b <sub>2</sub> | 3a <sub>1</sub> 4a <sub>1</sub> | 2.06 | -38.562058       | 11.30            | -38.548132        | 11.40             | -38.551609          | 11.35               | -38.494707          | 11.60               |

## S2.5 The $2^1\Sigma^+$ State of NH

Inspection of Figure 3 in the main paper shows one data point, labeled  $\psi_1$ , at  $\text{NOS} \approx 0$  and  $\Delta\text{NOS} \approx -2$ , respectively, with an error considerably larger than that of the rest of the states. This state is the  $2^1\Sigma^+$  ( $3^1A_1$ ) state of the NH molecule. NH possesses a  $1^3\Sigma^-$  ( $1^3A_2$ ) open-shell ground state belonging to the electronic configuration  $(1\sigma^+)^2(2\sigma^+)^2(3\sigma^+)^2(1\pi 1\pi)^2$ , and the  $2^1\Sigma^+$  state may be described by a  $(3\sigma^+)^2 \rightarrow (1\pi 1\pi)^2$  double excitation. For this transition,  $\Delta\text{NOS} \approx -2$ , and the resulting state is described by the closed-shell electronic configuration  $(1\sigma^+)^2(2\sigma^+)^2(3\sigma^+)^0(1\pi 1\pi)^4$ . This is a rather unique transition. There is no corresponding double excitation from an open-shell ground state yielding a closed-shell excited state in our test set, so we simply report this unusual large error but refrain from speculating about its origin.

## S2.6 Potential Energy Curves of Diatomic Molecules

For the first-row hydrides (HLi, HBe, HB, HC, HN, HO, HF) and the homodiatom molecules ( $\text{Li}_2$ ,  $\text{B}_2$ ,  $\text{C}_2$ ,  $\text{N}_2$ ), the potential energy curves were computed using CASPT2 (NOIPEA,  $\varepsilon = 0$ ) and different ANO-RCC basis sets (MB, VDZ, VDZP, VTZP, VQZP). The active spaces and correlated electrons were the same as described in section S2.1. In Table S6, the total energies of these molecules are reported for various interatomic distances.

Table S6: Total NOIPEA CASPT2 energies of diatomic molecules in a.u. obtained using different ANO-RCC basis sets for different interatomic distances  $R$  (in Å).

| Molecule | R    | MB        | VDZ       | VDZP      | VTZP      | VQZP      |
|----------|------|-----------|-----------|-----------|-----------|-----------|
| HLi      | 1.20 | -7.952643 | -7.974778 | -7.995687 | -8.022978 | -8.028067 |
| HLi      | 1.30 | -7.971420 | -7.992330 | -8.012077 | -8.039030 | -8.044010 |
| HLi      | 1.35 | -7.978083 | -7.998450 | -8.017664 | -8.044454 | -8.049365 |
| HLi      | 1.40 | -7.983312 | -8.003212 | -8.021900 | -8.048500 | -8.053333 |
| HLi      | 1.42 | -7.985054 | -8.004786 | -8.023269 | -8.049781 | -8.054582 |
| HLi      | 1.44 | -7.986615 | -8.006188 | -8.024469 | -8.050889 | -8.055656 |
| HLi      | 1.46 | -7.988007 | -8.007429 | -8.025514 | -8.051834 | -8.056568 |
| HLi      | 1.48 | -7.989241 | -8.008521 | -8.026414 | -8.052627 | -8.057327 |
| HLi      | 1.50 | -7.990327 | -8.009473 | -8.027178 | -8.053277 | -8.057945 |
| HLi      | 1.52 | -7.991273 | -8.010294 | -8.027815 | -8.053796 | -8.058431 |
| HLi      | 1.54 | -7.992090 | -8.010991 | -8.028333 | -8.054190 | -8.058793 |
| HLi      | 1.55 | -7.992452 | -8.011297 | -8.028551 | -8.054343 | -8.058930 |
| HLi      | 1.56 | -7.992784 | -8.011574 | -8.028741 | -8.054469 | -8.059040 |
| HLi      | 1.57 | -7.993088 | -8.011825 | -8.028906 | -8.054567 | -8.059123 |

Table S6: ... continued

| Molecule | R     | MB         | VDZ        | VDZP       | VTZP       | VQZP       |
|----------|-------|------------|------------|------------|------------|------------|
| HLi      | 1.58  | -7.993364  | -8.012050  | -8.029045  | -8.054639  | -8.059180  |
| HLi      | 1.59  | -7.993613  | -8.012250  | -8.029160  | -8.054686  | -8.059212  |
| HLi      | 1.60  | -7.993836  | -8.012425  | -8.029252  | -8.054709  | -8.059219  |
| HLi      | 1.61  | -7.994034  | -8.012577  | -8.029321  | -8.054708  | -8.059204  |
| HLi      | 1.62  | -7.994207  | -8.012706  | -8.029367  | -8.054684  | -8.059166  |
| HLi      | 1.63  | -7.994357  | -8.012814  | -8.029393  | -8.054639  | -8.059106  |
| HLi      | 1.64  | -7.994483  | -8.012900  | -8.029398  | -8.054572  | -8.059026  |
| HLi      | 1.66  | -7.994670  | -8.013011  | -8.029348  | -8.054378  | -8.058805  |
| HLi      | 1.68  | -7.994774  | -8.013046  | -8.029224  | -8.054108  | -8.058509  |
| HLi      | 1.70  | -7.994799  | -8.013009  | -8.029030  | -8.053767  | -8.058144  |
| HLi      | 1.75  | -7.994547  | -8.012633  | -8.028267  | -8.052636  | -8.056957  |
| HLi      | 1.80  | -7.993902  | -8.011905  | -8.027157  | -8.049948  | -8.055433  |
| HLi      | 1.85  | -7.992919  | -8.010883  | -8.025755  | -8.048205  | -8.052470  |
| HLi      | 1.90  | -7.991651  | -8.009616  | -8.024109  | -8.046233  | -8.050459  |
| HLi      | 2.00  | -7.988429  | -8.006510  | -8.020248  | -8.041774  | -8.045933  |
| HLi      | 2.10  | -7.984534  | -8.002866  | -8.015847  | -8.036854  | -8.040956  |
| HLi      | 2.20  | -7.980200  | -7.998889  | -8.011115  | -8.032751  | -8.035731  |
| HLi      | 2.40  | -7.970933  | -7.990532  | -8.001256  | -8.022120  | -8.026019  |
| HLi      | 2.60  | -7.961757  | -7.982294  | -7.991534  | -8.011851  | -8.015639  |
| HLi      | 3.00  | -7.946366  | -7.967974  | -7.974321  | -7.993985  | -7.997525  |
| HLi      | 3.50  | -7.934985  | -7.955984  | -7.959172  | -7.978361  | -7.981560  |
| HLi      | 4.00  | -7.930133  | -7.950002  |            | -7.970145  | -7.973096  |
| HLi      | 5.00  | -7.927612  | -7.946385  | -7.946596  | -7.965488  | -7.968297  |
| HLi      | 6.00  | -7.927273  | -7.945657  | -7.945707  | -7.964849  | -7.967641  |
| HLi      | 8.00  | -7.927223  | -7.945362  | -7.945369  | -7.964743  | -7.967516  |
| HLi      | 10.00 | -7.927223  | -7.945326  | -7.945329  | -7.964736  | -7.967504  |
| HBe      | 0.80  | -14.921501 | -14.952765 | -14.981891 | -15.031257 | -15.043053 |
| HBe      | 0.90  | -15.018920 | -15.046340 | -15.072299 | -15.119515 | -15.130621 |
| HBe      | 1.00  | -15.081327 | -15.104896 | -15.127343 | -15.173100 | -15.183595 |
| HBe      | 1.10  | -15.120784 | -15.140215 | -15.159533 | -15.204158 | -15.214055 |
| HBe      | 1.15  | -15.134309 | -15.151681 | -15.169647 | -15.213784 | -15.223384 |
| HBe      | 1.20  | -15.144607 |            | -15.176752 | -15.220440 | -15.229752 |
| HBe      | 1.21  | -15.146327 | -15.161345 | -15.177864 | -15.221465 | -15.230721 |
| HBe      | 1.22  | -15.147944 |            | -15.178881 | -15.222398 | -15.231599 |
| HBe      | 1.23  | -15.149460 | -15.163735 | -15.179808 | -15.223243 | -15.232389 |
| HBe      | 1.24  | -15.150879 | -15.164792 | -15.180649 | -15.224002 | -15.233095 |
| HBe      | 1.25  | -15.152205 | -15.165762 | -15.181407 | -15.224680 | -15.233721 |
| HBe      | 1.26  | -15.153441 | -15.166648 | -15.182086 | -15.225279 | -15.234269 |
| HBe      | 1.27  | -15.154590 | -15.167455 | -15.182688 | -15.225803 | -15.234742 |

Table S6: ... continued

| Molecule | R    | MB         | VDZ        | VDZP       | VTZP       | VQZP       |
|----------|------|------------|------------|------------|------------|------------|
| HBe      | 1.28 | -15.155655 | -15.168185 | -15.183217 | -15.226255 | -15.235145 |
| HBe      | 1.30 | -15.157545 | -15.169426 | -15.184066 | -15.226955 | -15.235751 |
| HBe      | 1.32 | -15.159133 | -15.170397 | -15.184657 | -15.227400 | -15.236107 |
| HBe      | 1.35 | -15.160996 | -15.171392 | -15.185104 | -15.227637 | -15.236221 |
| HBe      | 1.40 | -15.162874 | -15.171984 | -15.184830 | -15.227031 | -15.235440 |
| HBe      | 1.45 | -15.163447 | -15.171476 | -15.183501 | -15.225392 | -15.233662 |
| HBe      | 1.50 | -15.162946 | -15.170094 | -15.181332 | -15.222932 | -15.231094 |
| HBe      | 1.60 | -15.159495 | -15.165441 | -15.176594 | -15.216224 | -15.224242 |
| HBe      | 1.70 | -15.153824 | -15.159222 | -15.169405 | -15.208007 | -15.215935 |
| HBe      | 1.80 | -15.146936 | -15.152298 | -15.161569 | -15.200511 | -15.208480 |
| HBe      | 2.00 | -15.132506 | -15.138727 | -15.146177 | -15.183956 | -15.191703 |
| HBe      | 2.20 | -15.120745 | -15.128085 | -15.133615 | -15.170349 | -15.177819 |
| HBe      | 2.40 | -15.113757 | -15.121701 | -15.125407 | -15.161291 | -15.168458 |
| HBe      | 2.60 | -15.110896 | -15.118920 | -15.121257 | -15.156589 | -15.163508 |
| HBe      | 3.00 | -15.110420 | -15.118093 | -15.119095 | -15.153986 | -15.160653 |
| HBe      | 4.00 | -15.111604 | -15.118818 | -15.119007 | -15.153804 | -15.160338 |
| HBe      | 5.00 | -15.111758 | -15.118803 | -15.118894 | -15.153756 | -15.160271 |
| HBe      | 6.00 | -15.111768 | -15.118719 | -15.118784 | -15.153721 | -15.160228 |
| HBe      | 8.00 | -15.111768 | -15.118669 | -15.118710 | -15.153704 | -15.160207 |
| HB       | 0.80 | -24.917348 | -25.006297 | -25.052045 | -25.103969 | -25.120611 |
| HB       | 0.90 | -25.023100 | -25.095271 | -25.138561 | -25.184759 | -25.200380 |
| HB       | 1.00 | -25.088214 | -25.144666 | -25.186451 | -25.228520 | -25.243835 |
| HB       | 1.10 | -25.126568 | -25.169825 | -25.210275 | -25.249796 | -25.264724 |
| HB       | 1.15 | -25.138678 | -25.176439 | -25.216216 | -25.254786 | -25.269616 |
| HB       | 1.20 | -25.147232 | -25.180237 | -25.219312 | -25.257084 | -25.271875 |
| HB       | 1.21 | -25.148578 | -25.180718 | -25.219648 | -25.257275 | -25.272066 |
| HB       | 1.22 | -25.149813 | -25.181118 | -25.219901 | -25.257388 | -25.272180 |
| HB       | 1.23 | -25.150943 | -25.181439 | -25.220074 | -25.257425 | -25.272220 |
| HB       | 1.24 | -25.151972 | -25.181688 | -25.220171 | -25.257392 | -25.272191 |
| HB       | 1.25 | -25.152903 | -25.181866 | -25.220197 | -25.257290 | -25.272096 |
| HB       | 1.26 | -25.153742 | -25.181979 | -25.220156 | -25.257124 | -25.271939 |
| HB       | 1.27 | -25.154491 | -25.182030 | -25.220050 | -25.256897 | -25.271722 |
| HB       | 1.28 | -25.155156 | -25.182021 | -25.219882 | -25.256613 | -25.271449 |
| HB       | 1.30 | -25.156242 | -25.181840 | -25.219378 | -25.255883 | -25.270747 |
| HB       | 1.32 | -25.157029 | -25.181459 | -25.218666 | -25.254957 | -25.269854 |
| HB       | 1.35 | -25.157701 | -25.180562 | -25.217256 | -25.253245 | -25.268200 |
| HB       | 1.40 | -25.157655 | -25.178352 | -25.214154 | -25.249681 | -25.264753 |
| HB       | 1.45 | -25.156409 | -25.175460 | -25.210328 | -25.245435 | -25.260641 |
| HB       | 1.50 | -25.154219 | -25.172080 | -25.205981 | -25.240705 | -25.256051 |

Table S6: ... continued

| Molecule | R    | MB         | VDZ        | VDZP       | VTZP       | VQZP       |
|----------|------|------------|------------|------------|------------|------------|
| HB       | 1.60 | -25.147814 | -25.164422 | -25.196336 | -25.230384 | -25.246008 |
| HB       | 1.70 | -25.139726 | -25.156204 | -25.186141 | -25.219624 | -25.235482 |
| HB       | 1.80 | -25.130849 | -25.147910 | -25.175962 | -25.208982 | -25.225007 |
| HB       | 2.00 | -25.112999 | -25.132092 | -25.156870 | -25.189227 | -25.205405 |
| HB       | 2.20 | -25.097193 | -25.118104 | -25.140417 | -25.172363 | -25.188552 |
| HB       | 2.40 | -25.084592 | -25.106383 | -25.127018 | -25.158711 | -25.174864 |
| HB       | 2.60 | -25.075318 | -25.097046 | -25.116678 | -25.148201 | -25.164321 |
| HB       | 3.00 | -25.064709 | -25.084892 | -25.103906 | -25.135147 | -25.151272 |
| HB       | 3.50 | -25.059836 | -25.078189 | -25.097476 | -25.128373 | -25.144605 |
| HB       | 4.00 | -25.058448 | -25.075912 | -25.095494 | -25.126133 | -25.142507 |
| HB       | 5.00 | -25.057980 | -25.074919 | -25.094643 | -25.125007 | -25.141615 |
| HB       | 6.00 | -25.057950 | -25.074783 | -25.094514 | -25.124761 | -25.141494 |
| HB       | 8.00 | -25.057948 | -25.074754 | -25.094484 |            |            |
| HC       | 0.70 | -37.882867 | -38.052246 | -38.120907 | -38.181000 | -38.208941 |
| HC       | 0.80 | -38.061750 | -38.193427 | -38.259097 | -38.308450 | -38.337274 |
| HC       | 0.90 | -38.166345 | -38.267015 | -38.330853 | -38.371717 | -38.401715 |
| HC       | 0.95 | -38.200242 | -38.288077 | -38.351049 | -38.388625 | -38.418727 |
| HC       | 1.00 | -38.225288 | -38.301983 | -38.364085 | -38.398991 | -38.428630 |
| HC       | 1.02 | -38.233262 | -38.305954 | -38.367698 | -38.401704 | -38.430983 |
| HC       | 1.04 | -38.240226 | -38.309159 | -38.370538 | -38.403738 | -38.432559 |
| HC       | 1.06 | -38.246270 | -38.311682 | -38.372689 | -38.405172 | -38.433446 |
| HC       | 1.08 | -38.251479 | -38.313598 | -38.374224 | -38.406075 | -38.433724 |
| HC       | 1.09 | -38.253795 | -38.314350 | -38.374782 | -38.406347 | -38.433658 |
| HC       | 1.10 | -38.255929 | -38.314976 | -38.375211 | -38.406509 | -38.433470 |
| HC       | 1.11 | -38.257891 | -38.315481 | -38.375518 | -38.406567 | -38.433166 |
| HC       | 1.12 | -38.259672 | -38.315871 | -38.375708 | -38.406527 | -38.432760 |
| HC       | 1.13 | -38.261330 | -38.316162 | -38.375793 | -38.406395 | -38.432247 |
| HC       | 1.14 | -38.262823 | -38.316349 | -38.375775 | -38.406177 | -38.431648 |
| HC       | 1.15 | -38.264173 | -38.316443 | -38.375660 | -38.405877 | -38.430967 |
| HC       | 1.16 | -38.265387 | -38.316449 | -38.375455 | -38.405500 | -38.430209 |
| HC       | 1.18 | -38.267437 | -38.316217 | -38.374796 | -38.404536 | -38.428495 |
| HC       | 1.20 | -38.269019 | -38.315694 | -38.373838 | -38.403315 | -38.426553 |
| HC       | 1.22 | -38.270178 | -38.314914 | -38.372616 | -38.401869 | -38.424428 |
| HC       | 1.25 | -38.271211 | -38.313334 | -38.370359 | -38.399334 | -38.420973 |
| HC       | 1.30 | -38.271346 | -38.309828 | -38.365703 | -38.394327 | -38.414729 |
| HC       | 1.35 | -38.269905 | -38.305530 | -38.360237 | -38.388605 | -38.408131 |
| HC       | 1.40 | -38.267276 | -38.300711 | -38.354249 | -38.382415 | -38.401362 |
| HC       | 1.50 | -38.259658 | -38.290277 | -38.341536 | -38.369380 | -38.387746 |
| HC       | 1.60 | -38.250371 | -38.279647 | -38.328786 | -38.356341 | -38.374497 |

Table S6: ... continued

| Molecule | R     | MB         | VDZ        | VDZP       | VTZP       | VQZP       |
|----------|-------|------------|------------|------------|------------|------------|
| HC       | 1.80  | -38.231320 | -38.260085 | -38.305695 | -38.332673 | -38.350563 |
| HC       | 2.00  | -38.215548 | -38.244389 | -38.287568 | -38.313956 | -38.331441 |
| HC       | 2.50  | -38.195793 | -38.223114 | -38.263513 | -38.288595 | -38.305240 |
| HC       | 3.00  | -38.191150 | -38.216924 | -38.256753 | -38.281101 | -38.297466 |
| HC       | 4.00  | -38.189958 | -38.214913 | -38.254538 | -38.278406 | -38.294807 |
| HC       | 6.00  | -38.189898 | -38.214616 | -38.254189 | -38.277937 | -38.294335 |
| HC       | 8.00  | -38.189898 | -38.214598 | -38.254168 | -38.277897 | -38.294265 |
| HC       | 10.00 | -38.189898 | -38.214598 | -38.254167 |            |            |
| HN       | 0.70  | -54.674766 | -54.855509 | -54.945379 | -54.992510 | -55.020472 |
| HN       | 0.80  | -54.835425 | -54.974562 | -55.063853 | -55.106077 | -55.131301 |
| HN       | 0.88  | -54.908841 | -55.022620 | -55.110388 | -55.150256 | -55.173541 |
| HN       | 0.90  | -54.921946 | -55.030393 | -55.117646 | -55.157064 | -55.179916 |
| HN       | 0.95  | -54.947712 | -55.044409 | -55.130193 | -55.168659 | -55.190532 |
| HN       | 0.98  | -54.959153 | -55.049795 | -55.134599 | -55.172588 | -55.193948 |
| HN       | 1.00  | -54.965383 | -55.052366 | -55.136486 | -55.174188 | -55.195236 |
| HN       | 1.01  | -54.968122 | -55.053382 | -55.137153 | -55.174720 | -55.195619 |
| HN       | 1.02  | -54.970627 | -55.054232 | -55.137650 | -55.175087 | -55.195844 |
| HN       | 1.03  | -54.972911 | -55.054927 | -55.137989 | -55.175300 | -55.195921 |
| HN       | 1.04  | -54.974985 | -55.055477 | -55.138180 | -55.175370 | -55.195858 |
| HN       | 1.05  | -54.976861 | -55.055890 | -55.138231 | -55.175304 | -55.195666 |
| HN       | 1.06  | -54.978549 | -55.056175 | -55.138153 | -55.175113 | -55.195353 |
| HN       | 1.08  | -54.981399 | -55.056393 | -55.137641 | -55.174385 | -55.194396 |
| HN       | 1.10  | -54.983612 | -55.056190 | -55.136705 | -55.173247 | -55.193046 |
| HN       | 1.15  | -54.986777 | -55.054171 | -55.132869 | -55.168949 | -55.188290 |
| HN       | 1.20  | -54.987250 | -55.050517 | -55.127446 | -55.163114 | -55.182090 |
| HN       | 1.30  | -54.982788 | -55.040266 | -55.113897 | -55.148843 | -55.167311 |
| HN       | 1.50  | -54.964310 | -55.016316 | -55.084575 | -55.118287 | -55.136283 |
| HN       | 1.80  | -54.938574 | -54.987755 | -55.050880 | -55.082907 | -55.100356 |
| HN       | 2.00  | -54.928941 | -54.976590 | -55.037782 | -55.068793 | -55.085826 |
| HN       | 3.00  | -54.919970 | -54.964145 | -55.022795 | -55.051639 | -55.067847 |
| HN       | 4.00  | -54.919738 | -54.963608 | -55.022048 | -55.050615 | -55.066750 |
| HN       | 5.00  | -54.919730 | -54.963518 | -55.021929 | -55.050468 | -55.066552 |
| HN       | 6.00  | -54.919730 | -54.963493 | -55.021898 | -55.050431 | -55.066488 |
| HN       | 8.00  | -54.919730 | -54.963487 | -55.021890 | -55.050418 | -55.066463 |
| HN       | 10.00 | -54.919730 | -54.963487 | -55.021889 | -55.050416 | -55.066461 |
| HO       | 0.70  | -75.178757 | -75.363700 | -75.481842 | -75.557161 | -75.588309 |
| HO       | 0.75  | -75.263571 | -75.428476 | -75.543506 | -75.614113 | -75.644111 |
| HO       | 0.80  | -75.324685 | -75.472337 | -75.584241 | -75.651096 | -75.680119 |
| HO       | 0.85  | -75.368115 | -75.501120 | -75.609878 | -75.673745 | -75.701981 |

Table S6: ... continued

| Molecule | R     | MB          | VDZ         | VDZP        | VTZP        | VQZP        |
|----------|-------|-------------|-------------|-------------|-------------|-------------|
| HO       | 0.88  | -75.387579  | -75.512941  | -75.619810  | -75.682186  | -75.710038  |
| HO       | 0.90  | -75.398290  | -75.518997  | -75.624613  | -75.686102  | -75.713730  |
| HO       | 0.92  | -75.407418  | -75.523799  | -75.628168  | -75.688848  | -75.716275  |
| HO       | 0.94  | -75.415131  | -75.527498  | -75.630631  | -75.690571  | -75.717818  |
| HO       | 0.95  | -75.418506  | -75.528977  | -75.631496  | -75.691091  | -75.718254  |
| HO       | 0.96  | -75.421583  | -75.530230  | -75.632138  | -75.691403  | -75.718486  |
| HO       | 0.97  | -75.424379  | -75.531270  | -75.632572  | -75.691521  | -75.718528  |
| HO       | 0.98  | -75.426910  | -75.532112  | -75.632811  | -75.691458  | -75.718392  |
| HO       | 0.99  | -75.429191  | -75.532767  | -75.632869  | -75.691227  | -75.718092  |
| HO       | 1.00  | -75.431235  | -75.533248  | -75.632757  | -75.690839  | -75.717637  |
| HO       | 1.02  | -75.434667  | -75.533732  | -75.632071  | -75.689636  | -75.716306  |
| HO       | 1.05  | -75.438352  | -75.533411  | -75.630038  | -75.686906  | -75.713402  |
| HO       | 1.10  | -75.441286  | -75.530651  | -75.624549  | -75.680433  | -75.706670  |
| HO       | 1.20  | -75.438739  | -75.519662  | -75.608627  | -75.663026  | -75.688827  |
| HO       | 1.30  | -75.429724  | -75.505013  | -75.589772  | -75.643093  | -75.668535  |
| HO       | 1.50  | -75.405699  | -75.474416  | -75.552783  | -75.604604  | -75.629495  |
| HO       | 1.80  | -75.376322  | -75.439677  | -75.512427  | -75.562854  | -75.587011  |
| HO       | 2.00  | -75.365292  | -75.426120  | -75.496944  | -75.546779  | -75.570473  |
| HO       | 3.00  | -75.353579  | -75.410529  | -75.479185  | -75.528037  | -75.550879  |
| HO       | 4.00  | -75.353145  | -75.409773  | -75.478233  | -75.527073  | -75.549870  |
| HO       | 5.00  | -75.353124  | -75.409608  | -75.478028  | -75.526904  | -75.549709  |
| HO       | 6.00  | -75.353123  | -75.409544  | -75.477956  | -75.526840  | -75.549644  |
| HO       | 8.00  | -75.353123  | -75.409520  | -75.477929  | -75.526809  | -75.549613  |
| HO       | 10.00 | -75.353123  | -75.409520  | -75.477928  | -75.526807  | -75.549610  |
| HF       | 0.60  | -99.660118  | -99.890776  | -100.038852 | -100.150814 | -100.192425 |
| HF       | 0.70  | -99.908280  | -100.100202 | -100.237925 | -100.336751 | -100.374817 |
| HF       | 0.75  | -99.980781  | -100.157051 | -100.289776 | -100.383761 | -100.420561 |
| HF       | 0.80  | -100.031089 | -100.194115 | -100.321953 | -100.411977 | -100.447878 |
| HF       | 0.83  | -100.053158 | -100.209298 | -100.334280 | -100.422288 | -100.457802 |
| HF       | 0.85  | -100.065124 | -100.217078 | -100.340197 | -100.426994 | -100.462299 |
| HF       | 0.87  | -100.075186 | -100.223257 | -100.344547 | -100.430232 | -100.465361 |
| HF       | 0.88  | -100.079572 | -100.225809 | -100.346200 | -100.431362 | -100.466414 |
| HF       | 0.89  | -100.083562 | -100.228033 | -100.347536 | -100.432197 | -100.467178 |
| HF       | 0.90  | -100.087180 | -100.229951 | -100.348575 | -100.432756 | -100.467672 |
| HF       | 0.91  | -100.090447 | -100.231582 | -100.349340 | -100.433060 | -100.467916 |
| HF       | 0.92  | -100.093384 | -100.232945 | -100.349847 | -100.433126 | -100.467926 |
| HF       | 0.93  | -100.096011 | -100.234057 | -100.350115 | -100.432970 | -100.467719 |
| HF       | 0.94  | -100.098346 | -100.234934 | -100.350160 | -100.432610 | -100.467310 |
| HF       | 0.96  | -100.102208 | -100.236045 | -100.349643 | -100.431330 | -100.465943 |

Table S6: ... continued

| Molecule        | R     | MB          | VDZ         | VDZP        | VTZP        | VQZP        |
|-----------------|-------|-------------|-------------|-------------|-------------|-------------|
| HF              | 0.98  | -100.105100 | -100.236388 | -100.348408 | -100.429394 | -100.463929 |
| HF              | 1.00  | -100.107134 | -100.236061 | -100.346554 | -100.426893 | -100.461358 |
| HF              | 1.05  | -100.109105 | -100.232853 | -100.339756 | -100.418685 | -100.452998 |
| HF              | 1.10  | -100.107629 | -100.227066 | -100.330700 | -100.408459 | -100.442639 |
| HF              | 1.20  | -100.098058 | -100.210784 | -100.308789 | -100.384724 | -100.418659 |
| HF              | 1.30  | -100.083849 | -100.191521 | -100.284969 | -100.359547 | -100.393244 |
| HF              | 1.40  | -100.068179 | -100.171706 | -100.261488 | -100.335037 | -100.368498 |
| HF              | 1.50  | -100.052900 | -100.152739 | -100.239585 | -100.312375 | -100.345585 |
| HF              | 1.60  | -100.039040 | -100.135423 | -100.219937 | -100.292212 | -100.325139 |
| HF              | 1.80  | -100.017208 | -100.107248 | -100.188537 | -100.260365 | -100.292645 |
| HF              | 2.00  | -100.003125 | -100.088008 | -100.167476 | -100.239301 | -100.270986 |
| HF              | 2.50  | -99.989050  | -100.067508 | -100.145380 | -100.217440 | -100.248333 |
| HF              | 3.00  | -99.986212  | -100.063200 | -100.140699 | -100.212869 | -100.243566 |
| HF              | 4.00  | -99.985579  | -100.062089 | -100.139385 | -100.211673 | -100.242362 |
| HF              | 5.00  | -99.985555  | -100.061921 | -100.139175 | -100.211512 | -100.242212 |
| HF              | 6.00  | -99.985554  | -100.061863 | -100.139109 | -100.211460 | -100.242157 |
| HF              | 8.00  | -99.985554  | -100.061843 | -100.139087 | -100.211438 | -100.242135 |
| HF              | 10.00 | -99.985554  | -100.061843 | -100.139086 | -100.211436 | -100.242133 |
| Li <sub>2</sub> | 1.50  | -14.794881  | -14.800108  | -14.805324  | -14.813445  | -14.813933  |
| Li <sub>2</sub> | 2.00  | -14.865549  | -14.868701  | -14.876246  | -14.881666  | -14.882003  |
| Li <sub>2</sub> | 2.20  | -14.879434  | -14.881897  | -14.889489  | -14.894406  | -14.894737  |
| Li <sub>2</sub> | 2.20  | -14.879434  | -14.881897  | -14.889489  | -14.894406  | -14.894737  |
| Li <sub>2</sub> | 2.30  | -14.884196  | -14.886351  | -14.893822  | -14.898501  | -14.898836  |
| Li <sub>2</sub> | 2.40  | -14.887767  | -14.889643  | -14.896929  | -14.901373  | -14.901713  |
| Li <sub>2</sub> | 2.50  | -14.890322  | -14.891948  | -14.899006  | -14.903219  | -14.903564  |
| Li <sub>2</sub> | 2.50  | -14.890322  | -14.891948  | -14.899006  | -14.903219  | -14.903564  |
| Li <sub>2</sub> | 2.55  | -14.891269  | -14.892782  | -14.899714  | -14.903812  | -14.904160  |
| Li <sub>2</sub> | 2.58  | -14.891743  | -14.893191  | -14.900044  | -14.904075  | -14.904424  |
| Li <sub>2</sub> | 2.60  | -14.892021  | -14.893428  | -14.900228  | -14.904213  | -14.904563  |
| Li <sub>2</sub> | 2.62  | -14.892271  | -14.893637  | -14.900383  | -14.904324  | -14.904674  |
| Li <sub>2</sub> | 2.64  | -14.892493  | -14.893820  | -14.900511  | -14.904408  | -14.904758  |
| Li <sub>2</sub> | 2.65  | -14.892594  | -14.893902  | -14.900565  | -14.904440  | -14.904791  |
| Li <sub>2</sub> | 2.66  | -14.892689  | -14.893978  | -14.900613  | -14.904466  | -14.904817  |
| Li <sub>2</sub> | 2.67  | -14.892777  | -14.894048  | -14.900654  | -14.904486  | -14.904837  |
| Li <sub>2</sub> | 2.68  | -14.892860  | -14.894111  | -14.900690  | -14.904500  | -14.904851  |
| Li <sub>2</sub> | 2.69  | -14.892936  | -14.894169  | -14.900719  | -14.904508  | -14.904859  |
| Li <sub>2</sub> | 2.70  | -14.893006  | -14.894221  | -14.900743  | -14.904510  | -14.904861  |
| Li <sub>2</sub> | 2.72  | -14.893128  | -14.894309  | -14.900773  | -14.904497  | -14.904848  |
| Li <sub>2</sub> | 2.75  | -14.893270  | -14.894399  | -14.900776  | -14.904437  | -14.904789  |

Table S6: ... continued

| Molecule        | R     | MB         | VDZ        | VDZP       | VTZP       | VQZP       |
|-----------------|-------|------------|------------|------------|------------|------------|
| Li <sub>2</sub> | 2.80  | -14.893400 | -14.894450 | -14.900681 | -14.904237 | -14.904589 |
| Li <sub>2</sub> | 2.90  | -14.893314 | -14.894222 | -14.900152 | -14.903508 | -14.903861 |
| Li <sub>2</sub> | 3.00  | -14.892841 | -14.893627 | -14.899252 | -14.902416 | -14.902770 |
| Li <sub>2</sub> | 4.00  | -14.880095 | -14.880331 | -14.882958 | -14.884660 | -14.884992 |
| Li <sub>2</sub> | 5.00  | -14.870815 | -14.870968 | -14.871749 | -14.872449 | -14.872620 |
| Li <sub>2</sub> | 6.00  | -14.867702 | -14.867860 | -14.868055 | -14.868289 | -14.868350 |
| Li <sub>2</sub> | 8.00  | -14.866658 | -14.866836 | -14.866852 | -14.866903 | -14.866915 |
| Li <sub>2</sub> | 10.00 | -14.866558 | -14.866742 | -14.866745 | -14.866774 | -14.866782 |
| B <sub>2</sub>  | 0.80  | -47.803430 | -47.986930 | -48.051972 | -48.120571 | -48.142814 |
| B <sub>2</sub>  | 1.00  | -48.642764 | -48.759167 | -48.817820 | -48.860983 | -48.873377 |
| B <sub>2</sub>  | 1.20  | -49.012372 | -49.091329 | -49.145509 | -49.173168 | -49.182503 |
| B <sub>2</sub>  | 1.30  | -49.104302 | -49.169294 | -49.221714 | -49.245034 | -49.253495 |
| B <sub>2</sub>  | 1.40  | -49.159996 | -49.213269 | -49.264159 | -49.284431 | -49.292104 |
| B <sub>2</sub>  | 1.45  | -49.177924 | -49.226400 | -49.276626 | -49.295769 | -49.303108 |
| B <sub>2</sub>  | 1.50  | -49.190862 | -49.235130 | -49.284750 | -49.302957 | -49.309984 |
| B <sub>2</sub>  | 1.52  | -49.194852 | -49.237593 | -49.286985 | -49.304862 | -49.311781 |
| B <sub>2</sub>  | 1.54  | -49.198245 | -49.239544 | -49.288716 | -49.306285 | -49.313102 |
| B <sub>2</sub>  | 1.56  | -49.201088 | -49.241029 | -49.289988 | -49.307269 | -49.313992 |
| B <sub>2</sub>  | 1.57  | -49.202318 | -49.241608 | -49.290465 | -49.307609 | -49.314287 |
| B <sub>2</sub>  | 1.58  | -49.203426 | -49.242089 | -49.290842 | -49.307854 | -49.314490 |
| B <sub>2</sub>  | 1.59  | -49.204420 | -49.242473 | -49.291125 | -49.308009 | -49.314603 |
| B <sub>2</sub>  | 1.60  | -49.205302 | -49.242764 | -49.291318 | -49.307876 | -49.314632 |
| B <sub>2</sub>  | 1.61  | -49.206078 | -49.242970 | -49.291425 | -49.307864 | -49.314582 |
| B <sub>2</sub>  | 1.62  | -49.206753 | -49.243092 | -49.291342 | -49.307774 | -49.314455 |
| B <sub>2</sub>  | 1.64  | -49.207815 | -49.243104 | -49.291166 | -49.307377 | -49.313987 |
| B <sub>2</sub>  | 1.67  | -49.208753 | -49.242492 | -49.290387 | -49.306291 | -49.312595 |
| B <sub>2</sub>  | 1.68  | -49.208906 | -49.242198 | -49.290003 | -49.305812 | -49.312089 |
| B <sub>2</sub>  | 1.69  | -49.208985 | -49.241847 | -49.289564 | -49.305280 | -49.311530 |
| B <sub>2</sub>  | 1.70  | -49.208994 | -49.241442 | -49.289072 | -49.304697 | -49.310922 |
| B <sub>2</sub>  | 1.71  | -49.208935 | -49.240986 | -49.288529 | -49.304068 | -49.310268 |
| B <sub>2</sub>  | 1.72  | -49.208813 | -49.240482 | -49.287939 | -49.303393 | -49.309571 |
| B <sub>2</sub>  | 1.73  | -49.208630 | -49.239932 | -49.287305 | -49.302676 | -49.308832 |
| B <sub>2</sub>  | 1.74  | -49.208390 | -49.239340 | -49.286629 | -49.301920 | -49.308055 |
| B <sub>2</sub>  | 1.75  | -49.208094 | -49.238708 | -49.285913 | -49.301127 | -49.307242 |
| B <sub>2</sub>  | 1.80  | -49.205884 | -49.235031 | -49.281824 | -49.296683 | -49.302713 |
| B <sub>2</sub>  | 1.90  | -49.198650 | -49.225889 | -49.271888 | -49.286165 | -49.292085 |
| B <sub>2</sub>  | 2.00  | -49.189367 | -49.215643 | -49.260874 | -49.274694 | -49.280560 |
| B <sub>2</sub>  | 3.00  | -49.131460 | -49.157213 | -49.198750 | -49.210264 | -49.216131 |
| B <sub>2</sub>  | 4.00  | -49.128125 | -49.152524 | -49.193957 | -49.204963 | -49.210675 |

Table S6: ... continued

| Molecule       | R     | MB         | VDZ        | VDZP       | VTZP       | VQZP       |
|----------------|-------|------------|------------|------------|------------|------------|
| B <sub>2</sub> | 5.00  | -49.127838 | -49.152041 | -49.193458 | -49.204433 | -49.210147 |
| B <sub>2</sub> | 6.00  | -49.127796 | -49.151960 | -49.193362 | -49.204324 | -49.210030 |
| B <sub>2</sub> | 7.00  | -49.127787 | -49.151938 | -49.193329 | -49.204294 | -49.209992 |
| B <sub>2</sub> | 8.00  | -49.127784 | -49.151933 | -49.193325 | -49.204290 | -49.209985 |
| B <sub>2</sub> | 10.00 | -49.127783 | -49.151931 | -49.193327 | -49.204292 | -49.209985 |
| C <sub>2</sub> | 0.80  | -74.431468 | -74.778154 | -74.878870 | -75.007478 | -75.035350 |
| C <sub>2</sub> | 0.90  | -74.954002 | -75.225166 | -75.321941 | -75.422863 | -75.448716 |
| C <sub>2</sub> | 1.00  | -75.255524 | -75.467332 | -75.559595 | -75.641958 | -75.668748 |
| C <sub>2</sub> | 1.05  | -75.351554 | -75.538897 | -75.629108 | -75.704906 | -75.732007 |
| C <sub>2</sub> | 1.10  | -75.421389 | -75.587374 | -75.675724 | -75.746377 | -75.773498 |
| C <sub>2</sub> | 1.14  | -75.462268 | -75.613212 | -75.700215 | -75.767513 | -75.794504 |
| C <sub>2</sub> | 1.16  | -75.478550 | -75.622605 | -75.708981 | -75.774784 | -75.801690 |
| C <sub>2</sub> | 1.18  | -75.492410 | -75.629973 | -75.715752 | -75.780146 | -75.806972 |
| C <sub>2</sub> | 1.20  | -75.504080 | -75.635531 | -75.720743 | -75.783789 | -75.810551 |
| C <sub>2</sub> | 1.21  | -75.509162 | -75.637693 | -75.722633 | -75.785021 | -75.811761 |
| C <sub>2</sub> | 1.22  | -75.513775 | -75.639475 | -75.724150 | -75.785887 | -75.812612 |
| C <sub>2</sub> | 1.23  | -75.517943 | -75.640898 | -75.725314 | -75.786405 | -75.813126 |
| C <sub>2</sub> | 1.24  | -75.521688 | -75.641983 | -75.726148 | -75.786595 | -75.813321 |
| C <sub>2</sub> | 1.25  | -75.525033 | -75.642750 | -75.726671 | -75.786473 | -75.813217 |
| C <sub>2</sub> | 1.26  | -75.527997 | -75.643216 | -75.726900 | -75.786056 | -75.812829 |
| C <sub>2</sub> | 1.27  | -75.530602 | -75.643401 | -75.726855 | -75.785362 | -75.812176 |
| C <sub>2</sub> | 1.28  | -75.532865 | -75.643321 | -75.726552 | -75.784407 | -75.811272 |
| C <sub>2</sub> | 1.30  | -75.536439 | -75.642430 | -75.725235 | -75.781775 | -75.808775 |
| C <sub>2</sub> | 1.32  | -75.538855 | -75.640665 | -75.723071 | -75.778284 | -75.805450 |
| C <sub>2</sub> | 1.34  | -75.540237 | -75.638135 | -75.720169 | -75.774059 | -75.801401 |
| C <sub>2</sub> | 1.36  | -75.540698 | -75.634941 | -75.716628 | -75.769216 | -75.796723 |
| C <sub>2</sub> | 1.40  | -75.539262 | -75.626914 | -75.707984 | -75.758126 | -75.785818 |
| C <sub>2</sub> | 1.45  | -75.533949 | -75.614589 | -75.695028 | -75.742625 | -75.770062 |
| C <sub>2</sub> | 1.50  | -75.525798 | -75.600631 | -75.680588 | -75.726340 | -75.752907 |
| C <sub>2</sub> | 1.60  | -75.504528 | -75.570731 | -75.650168 | -75.693940 | -75.717766 |
| C <sub>2</sub> | 1.80  | -75.458934 | -75.515503 | -75.609574 | -75.647449 | -75.668407 |
| C <sub>2</sub> | 2.00  | -75.430874 | -75.488879 | -75.576381 | -75.621180 | -75.637380 |
| C <sub>2</sub> | 2.20  | -75.414348 | -75.467857 | -75.551404 | -75.594283 | -75.614609 |
| C <sub>2</sub> | 2.50  | -75.399718 | -75.448363 | -75.529645 | -75.569522 | -75.584394 |
| C <sub>2</sub> | 3.00  | -75.393232 | -75.436564 | -75.514544 | -75.551328 | -75.569712 |
| C <sub>2</sub> | 4.00  | -75.391922 | -75.432769 | -75.513005 | -75.548586 | -75.564836 |
| C <sub>2</sub> | 5.00  | -75.391804 | -75.432377 | -75.512537 | -75.547842 | -75.566555 |
| C <sub>2</sub> | 6.00  | -75.391791 | -75.432332 | -75.512472 | -75.547683 | -75.566394 |
| C <sub>2</sub> | 8.00  | -75.391784 | -75.432331 | -75.512463 | -75.545600 | -75.564115 |

Table S6: ... continued

| Molecule       | R     | MB          | VDZ         | VDZP        | VTZP        | VQZP        |
|----------------|-------|-------------|-------------|-------------|-------------|-------------|
| C <sub>2</sub> | 10.00 | -75.391787  | -75.432332  | -75.512463  | -75.547639  | -75.564122  |
| N <sub>2</sub> | 0.70  | -107.205057 | -107.786869 | -107.990564 | -108.143147 | -108.178157 |
| N <sub>2</sub> | 0.80  | -108.136409 | -108.582169 | -108.778463 | -108.885683 | -108.914201 |
| N <sub>2</sub> | 0.90  | -108.630119 | -108.968474 |             | -109.238538 | -109.263621 |
| N <sub>2</sub> | 0.95  | -108.776878 | -109.071621 | -109.254598 |             | -109.353440 |
| N <sub>2</sub> | 1.00  | -108.878630 | -109.135820 | -109.314359 | -109.383887 | -109.406640 |
| N <sub>2</sub> | 1.03  | -108.922921 | -109.160258 | -109.336131 | -109.403123 | -109.425344 |
| N <sub>2</sub> | 1.06  | -108.957096 | -109.176443 | -109.349639 | -109.414560 | -109.436310 |
| N <sub>2</sub> | 1.08  | -108.975086 | -109.183418 | -109.354820 | -109.418579 | -109.440045 |
| N <sub>2</sub> | 1.09  | -108.982807 | -109.185913 | -109.356415 | -109.419651 | -109.440983 |
| N <sub>2</sub> | 1.10  | -108.989745 | -109.187808 | -109.357406 | -109.420155 | -109.441358 |
| N <sub>2</sub> | 1.11  | -108.995947 | -109.189144 | -109.357835 | -109.420131 | -109.441210 |
| N <sub>2</sub> | 1.12  | -109.001456 | -109.189962 | -109.357743 | -109.419617 | -109.440575 |
| N <sub>2</sub> | 1.13  | -109.006315 | -109.190299 | -109.357168 | -109.418649 | -109.439491 |
| N <sub>2</sub> | 1.14  | -109.010561 | -109.190191 | -109.356144 | -109.417260 | -109.437989 |
| N <sub>2</sub> | 1.15  | -109.014234 | -109.189671 | -109.354705 | -109.415481 | -109.436101 |
| N <sub>2</sub> | 1.17  | -109.019995 | -109.187522 | -109.350707 | -109.410873 | -109.431285 |
| N <sub>2</sub> | 1.20  | -109.025155 | -109.181943 | -109.342330 | -109.401729 | -109.421854 |
| N <sub>2</sub> | 1.23  | -109.026810 | -109.174122 | -109.331689 | -109.390461 | -109.410327 |
| N <sub>2</sub> | 1.27  | -109.024677 | -109.161154 | -109.314938 | -109.373032 | -109.392596 |
| N <sub>2</sub> | 1.42  | -108.990535 | -109.101031 | -109.240994 | -109.297268 | -109.316014 |
| N <sub>2</sub> | 1.58  | -108.939544 | -109.038627 | -109.166200 | -109.220526 | -109.238571 |
| N <sub>2</sub> | 1.74  | -108.896315 | -108.990787 | -109.109660 | -109.161296 | -109.178510 |
| N <sub>2</sub> | 1.90  | -108.869632 | -108.960180 | -109.073752 | -109.122122 | -109.138344 |
| N <sub>2</sub> | 2.00  | -108.860726 | -108.948377 | -109.059928 | -109.106426 | -109.122064 |
| N <sub>2</sub> | 2.50  | -108.851605 | -108.929188 | -109.037187 | -109.079144 | -109.093322 |
| N <sub>2</sub> | 3.00  | -108.851668 | -108.926749 | -109.034086 | -109.075063 | -109.088838 |
| N <sub>2</sub> | 4.00  | -108.851646 | -108.925978 | -109.033451 | -109.074189 | -109.087860 |
| N <sub>2</sub> | 6.00  | -108.851630 | -108.925893 | -109.033593 | -109.074295 | -109.087974 |
| N <sub>2</sub> | 8.00  | -108.851629 | -108.925890 | -109.033592 | -109.074290 | -109.087967 |
| N <sub>2</sub> | 10.00 | -108.851628 | -108.925842 | -109.033025 | -109.073726 | -109.087416 |

## S3 Thiel’s Benchmark Set

### S3.1 Comments of the Benchmark Calculations of Thiel

Here we report a small number of inconsistencies that we have found between our calculations and the results reported by Thiel and coworkers,<sup>51</sup> when attempting to reproduce their values. Table S7 provides a complete list of the excitation energies reported in the Supporting Information of Ref. 51 as well as our own results.

When calculating the vertical excitation energies, Thiel et al. used two different ground state energies as the reference energies: for states that possess the same symmetry as the ground state –in our case this applies always to the totally symmetric singlet states –the MS-CASPT2 energy of the ground state was used as the reference energy. However, for states possessing a different symmetry than the ground state, the energy of the ground states was calculated separately using the SS-CASPT2 variant. We believe, that for a number of non-totally symmetric excited states of the molecules butadiene, benzene, naphthalene, and acetamide, the authors unintentionally used the MS-CASPT2 ground state energy as the reference energy in contrast to their explanations. Only under this assumption were we able to reproduce their results. Table S8 in section S3.2 lists both SS-CASPT2 and MS-CASPT2 energies for all ground states.

Furthermore, for imidazole and pyridazine, the active spaces were erroneously reported in the SI of Ref. 51. The correct list of orbitals comprising the active space with all valence  $\pi/\pi^*$  as well as  $n$  orbitals is given as a comment in Table S7. As special case is tetrazine. Tetrazine possesses 14 electrons in the valence  $\pi$  and  $n$  orbitals. The active space reported in Ref. 51, however, contained only 12 electrons. Using the more reasonable active space with 14 electrons, ca. 2/3 of all excitation energies could be reproduced, while for the other excited states the deviations could become as large as 2 eV. For acetone, one state ( $1^1B_1$ ) is reported at 9.27 eV while our calculations predict it to be well above 10 eV. We found that using a smaller active space than reported in the original benchmark study, however, reproduces the reported excitation energy. For benzoquinone, we could not reproduce the energies of three states satisfactorily. For formamide, the excitation energy of the  $1^3A'$  state is reported at 5.58 eV while we obtain a excitation energy of 5.68 eV. In addition, we note that the vertical excitation energies of the  $2^1A_g$  and the  $1^3B_u$  states of butadiene are correctly reported in the Supporting Information while apparently two typos have been introduced in these energies in

the main paper.

Finally, we wish to address the characterization of the excited states of triazine. Thiel and co-workers report the lowest-lying  ${}^1\pi\pi^*$  excited states to be the  $1\ {}^1A'_2$ ,  $2\ {}^1A'_1$ ,  $1\ {}^1E'$ , and  $2\ {}^1E'$  states,<sup>51</sup> in accordance with the classification given in an earlier CASPT2 study by the Roos group.<sup>2</sup> However, by calculating the excited states of triazine in  $C_s$  symmetry, as was done by Thiel and co-workers, our results suggest a different characterization for some of the states. We agree that the first two  ${}^1\pi\pi^*$  excited states are the  $1\ {}^1A'_2$  and  $2\ {}^1A'_1$  states, however, we question the characterization of the other two states as  ${}^1E'$  states. These two states were reported to lie at 7.49 and 8.99 eV. We, too, find each one  ${}^1\pi\pi^*$  state at 7.50 and 8.95 eV, however, the second component to both  ${}^1E'$  states is missing. The next higher-excited state of  $A'$  symmetry appears at 9.08 eV. It is not a described by a  $\pi \rightarrow \pi^*$  excitation but is rather given by a  $(nn) \rightarrow (\pi^*\pi^*)$  double excitation. Since our calculations did not exploit the full  $D_{3h}$  symmetry of the molecule, one might wonder whether either one of the components of the  ${}^1E'$  states may have been lost due to symmetry splitting. However, this is unlikely since using the very same approach, our calculations predicted both components of two  ${}^1E''$  states of  $n\pi^*$  character with an energetic splitting smaller than 0.01 eV. Thus, both  ${}^1\pi\pi^*$  states may require a new classification, which is, however, not of importance for the rest of this work.

Table S7: Comparison of vertical excitation energies reported in the benchmark study by Thiel and co-workers<sup>51</sup> and vertical excitation energies computed in this work. Differences larger than 0.05 eV are marked as “significant” in the comments. The order of the molecules and excited states is adopted from the Supporting Information of Ref. 51.

| Molecule     | State           | $V_i$ (Thiel SI) <sup>a</sup> | $V_i$ (MS) <sup>b</sup> | $V_i$ (SS) <sup>c</sup> | Comment                                   |
|--------------|-----------------|-------------------------------|-------------------------|-------------------------|-------------------------------------------|
| Ethene       | $1\ {}^1B_{1u}$ | 8.62                          | 8.54                    | 8.54                    | significant difference                    |
| Ethene       | $1\ {}^3B_{1u}$ | 4.60                          | 4.48                    | 4.48                    | significant difference                    |
| Butadiene    | $1\ {}^1B_u$    | 6.47                          | 6.47                    | 6.42                    | MS instead of SS                          |
| Butadiene    | $2\ {}^1A_g$    | 6.63                          | 6.62                    | 6.58                    | reported as $V_i = 6.83$ eV in main paper |
| Butadiene    | $1\ {}^3B_u$    | 3.34                          | 3.39                    | 3.34                    | reported as $V_i = 3.44$ eV in main paper |
| Butadiene    | $1\ {}^3A_g$    | 5.16                          | 5.21                    | 5.16                    |                                           |
| Hexatriene   | $1\ {}^1B_u$    | 5.31                          | 5.35                    | 5.32                    |                                           |
| Hexatriene   | $2\ {}^1A_g$    | 5.42                          | 5.42                    | 5.39                    |                                           |
| Hexatriene   | $1\ {}^3B_u$    | 2.71                          | 2.74                    | 2.71                    |                                           |
| Hexatriene   | $1\ {}^3A_g$    | 4.31                          | 4.34                    | 4.31                    |                                           |
| Octatetraene | $2\ {}^1A_g$    | 4.64                          | 4.64                    | 4.59                    |                                           |
| Octatetraene | $1\ {}^1B_u$    | 4.70                          | 4.75                    | 4.70                    |                                           |
| Octatetraene | $2\ {}^1B_u$    | 5.74                          | 5.79                    | 5.74                    |                                           |
| Octatetraene | $3\ {}^1A_g$    | 6.19                          | 6.19                    | 6.14                    |                                           |

Table S7: ... continued

| Molecule        | State        | $V_i$ (Thiel SI) <sup>a</sup> | $V_i$ (MS) <sup>b</sup> | $V_i$ (SS) <sup>c</sup> | Comment          |
|-----------------|--------------|-------------------------------|-------------------------|-------------------------|------------------|
| Octatetraene    | 4 $^1A_g$    | 6.57                          | 7.53                    | 7.48                    |                  |
| Octatetraene    | 3 $^1B_u$    | 8.04                          | 8.09                    | 8.04                    |                  |
| Octatetraene    | 1 $^3B_u$    | 2.33                          | 2.38                    | 2.33                    |                  |
| Octatetraene    | 1 $^3A_g$    | 3.70                          | 3.75                    | 3.70                    |                  |
| Cyclopropene    | 1 $^1B_1$    | 6.76                          | 6.76                    | 6.76                    |                  |
| Cyclopropene    | 1 $^1B_2$    | 7.06                          | 7.06                    | 7.06                    |                  |
| Cyclopropene    | 1 $^3B_2$    | 4.35                          | 4.35                    | 4.35                    |                  |
| Cyclopropene    | 1 $^3B_1$    | 6.51                          | 6.51                    | 6.51                    |                  |
| Cyclopentadiene | 1 $^1B_2$    | 5.51                          | 5.67                    | 5.51                    |                  |
| Cyclopentadiene | 2 $^1A_1$    | 6.31                          | 6.31                    | 6.15                    |                  |
| Cyclopentadiene | 3 $^1A_1$    | 8.52                          | 8.52                    | 8.37                    |                  |
| Cyclopentadiene | 1 $^3B_2$    | 3.28                          | 3.44                    | 3.28                    |                  |
| Cyclopentadiene | 1 $^3A_1$    | 5.10                          | 5.26                    | 5.11                    |                  |
| Norbornadiene   | 1 $^1A_2$    | 5.34                          | 5.56                    | 5.34                    |                  |
| Norbornadiene   | 1 $^1B_2$    | 6.11                          | 6.33                    | 6.11                    |                  |
| Norbornadiene   | 2 $^1B_2$    | 7.32                          | 7.54                    | 7.32                    |                  |
| Norbornadiene   | 2 $^1A_2$    | 7.44                          | 7.67                    | 7.45                    |                  |
| Norbornadiene   | 2 $^1A_1$    | 7.97                          | 7.97                    | 7.76                    |                  |
| Norbornadiene   | 1 $^3A_2$    | 3.75                          | 3.97                    | 3.75                    |                  |
| Norbornadiene   | 1 $^3B_2$    | 4.22                          | 4.44                    | 4.22                    |                  |
| Benzene         | 2 $^1A'$     | 5.05                          | 5.04                    | 5.01                    |                  |
| Benzene         | 3 $^1A'$     | 6.44                          | 6.44                    | 6.42                    |                  |
| Benzene         | 4 $^1A'$     | 7.07                          | 7.13                    | 7.11                    |                  |
| Benzene         | 5 $^1A'$     | 7.07                          | 7.14                    | 7.11                    |                  |
| Benzene         | 6 $^1A'$     | 8.21                          | 8.17                    | 8.15                    |                  |
| Benzene         | 7 $^1A'$     | 8.21                          | 8.20                    | 8.17                    |                  |
| Benzene         | 1 $^3A'$     | 4.17                          | 4.17                    | 4.15                    | MS instead of SS |
| Benzene         | 2 $^3A'$     | 4.90                          | 4.90                    | 4.87                    | MS instead of SS |
| Benzene         | 3 $^3A'$     | 4.90                          | 4.90                    | 4.88                    | MS instead of SS |
| Benzene         | 4 $^3A'$     | 5.76                          | 5.77                    | 5.75                    | MS instead of SS |
| Benzene         | 5 $^3A'$     | 7.41                          | 7.37                    | 7.35                    | MS instead of SS |
| Benzene         | 6 $^3A'$     | 7.41                          | 7.38                    | 7.36                    | MS instead of SS |
| Naphthalene     | 1 $^1B_{3u}$ | 4.24                          | 4.27                    | 4.24                    |                  |
| Naphthalene     | 1 $^1B_{2u}$ | 4.77                          | 4.80                    | 4.77                    |                  |
| Naphthalene     | 2 $^1A_g$    | 5.90                          | 5.87                    | 5.84                    |                  |
| Naphthalene     | 1 $^1B_{1g}$ | 6.00                          | 6.02                    | 5.99                    |                  |
| Naphthalene     | 2 $^1B_{3u}$ | 6.07                          | 6.09                    | 6.06                    |                  |
| Naphthalene     | 2 $^1B_{1g}$ | 6.48                          | 6.51                    | 6.48                    |                  |
| Naphthalene     | 2 $^1B_{2u}$ | 6.33                          | 6.36                    | 6.33                    |                  |

Table S7: ... continued

| Molecule    | State        | $V_i(\text{Thiel SI})^a$ | $V_i(\text{MS})^b$ | $V_i(\text{SS})^c$ | Comment             |
|-------------|--------------|--------------------------|--------------------|--------------------|---------------------|
| Naphthalene | 3 $^1A_g$    | 6.71                     | 6.67               | 6.64               |                     |
| Naphthalene | 3 $^1B_{2u}$ | 8.18                     | 8.20               | 8.18               |                     |
| Naphthalene | 3 $^1B_{3u}$ | 7.76                     | 7.78               | 7.75               |                     |
| Naphthalene | 1 $^3B_{2u}$ | 3.20                     | 3.20               | 3.17               | MS instead of SS    |
| Naphthalene | 1 $^3B_{3u}$ | 4.29                     | 4.29               | 4.26               | MS instead of SS    |
| Naphthalene | 1 $^3B_{1g}$ | 4.55                     | 4.55               | 4.52               | MS instead of SS    |
| Naphthalene | 2 $^3B_{2u}$ | 4.71                     | 4.71               | 4.68               | MS instead of SS    |
| Naphthalene | 2 $^3B_{3u}$ | 5.00                     | 5.00               | 4.97               | MS instead of SS    |
| Naphthalene | 1 $^3A_g$    | 5.57                     | 5.56               | 5.53               | MS instead of SS    |
| Naphthalene | 2 $^3B_{1g}$ | 6.25                     | 6.24               | 6.21               | MS instead of SS    |
| Naphthalene | 2 $^3A_g$    | 6.42                     | 6.42               | 6.39               | MS instead of SS    |
| Naphthalene | 3 $^3A_g$    | 6.63                     | 6.62               | 6.59               | MS instead of SS    |
| Naphthalene | 3 $^3B_{1g}$ | 6.67                     | 6.67               | 6.64               | MS instead of SS    |
| Furan       | 1 $^1B_2$    | 6.43                     | 6.57               | 6.39               |                     |
| Furan       | 2 $^1A_1$    | 6.52                     | 6.50               | 6.32               |                     |
| Furan       | 3 $^1A_1$    | 8.22                     | 8.17               | 7.99               |                     |
| Furan       | 1 $^3B_2$    | 4.17                     | 4.35               | 4.18               |                     |
| Furan       | 1 $^3A_1$    | 5.49                     | 5.67               | 5.49               |                     |
| Pyrrole     | 2 $^1A_1$    | 6.31                     | 6.31               | 6.24               |                     |
| Pyrrole     | 1 $^1B_2$    | 6.33                     | 6.40               | 6.33               |                     |
| Pyrrole     | 3 $^1A_1$    | 8.18                     | 8.17               | 8.10               |                     |
| Pyrrole     | 1 $^3B_2$    | 4.52                     | 4.58               | 4.51               |                     |
| Pyrrole     | 1 $^3A_1$    | 5.53                     | 5.59               | 5.53               |                     |
| Imidazole   | 1 $^1A''$    | 6.81                     | 6.87               | 6.81               | active space (1 5)8 |
| Imidazole   | 2 $^1A'$     | 6.19                     | 6.19               | 6.12               | active space (1 5)8 |
| Imidazole   | 3 $^1A'$     | 6.93                     | 6.93               | 6.86               | active space (1 5)8 |
| Imidazole   | 2 $^1A''$    | 7.91                     | 7.97               | 7.91               | active space (1 5)8 |
| Imidazole   | 4 $^1A'$     | 8.15                     | 8.16               | 8.09               | active space (1 5)8 |
| Imidazole   | 1 $^3A'$     | 4.65                     | 4.72               | 4.65               | active space (1 5)8 |
| Imidazole   | 2 $^3A'$     | 5.74                     | 5.80               | 5.74               | active space (1 5)8 |
| Imidazole   | 1 $^3A''$    | 6.36                     | 6.42               | 6.36               | active space (1 5)8 |
| Imidazole   | 3 $^3A'$     | 6.44                     | 6.51               | 6.44               | active space (1 5)8 |
| Imidazole   | 4 $^3A'$     | 7.43                     | 7.50               | 7.44               | active space (1 5)8 |
| Imidazole   | 2 $^3A''$    | 7.51                     | 7.58               | 7.51               | active space (1 5)8 |
| Pyridine    | 1 $^1B_2$    | 5.02                     | 5.08               | 5.04               |                     |
| Pyridine    | 2 $^1A_1$    | 6.39                     | 6.39               | 6.35               |                     |
| Pyridine    | 3 $^1A_1$    | 7.46                     | 7.46               | 7.42               |                     |
| Pyridine    | 2 $^1B_2$    | 7.29                     | 7.33               | 7.30               |                     |
| Pyridine    | 4 $^1A_1$    | 8.70                     | 8.69               | 8.66               |                     |

Table S7: ... continued

| Molecule   | State                          | V <sub>i</sub> (Thiel SI) <sup>a</sup> | V <sub>i</sub> (MS) <sup>b</sup> | V <sub>i</sub> (SS) <sup>c</sup> | Comment                  |
|------------|--------------------------------|----------------------------------------|----------------------------------|----------------------------------|--------------------------|
| Pyridine   | 3 <sup>1</sup> B <sub>2</sub>  | 8.62                                   | 8.66                             | 8.62                             |                          |
| Pyridine   | 1 <sup>1</sup> B <sub>1</sub>  | 5.14                                   | 5.19                             | 5.16                             |                          |
| Pyridine   | 1 <sup>1</sup> A <sub>2</sub>  | 5.47                                   | 5.53                             | 5.50                             |                          |
| Pyridine   | 1 <sup>3</sup> A <sub>1</sub>  | 4.27                                   | 4.30                             | 4.27                             |                          |
| Pyridine   | 1 <sup>3</sup> B <sub>2</sub>  | 4.72                                   | 4.75                             | 4.72                             |                          |
| Pyridine   | 2 <sup>3</sup> A <sub>1</sub>  | 5.03                                   | 5.07                             | 5.03                             |                          |
| Pyridine   | 2 <sup>3</sup> B <sub>2</sub>  | 6.02                                   | 6.06                             | 6.03                             |                          |
| Pyridine   | 3 <sup>3</sup> A <sub>1</sub>  | 7.56                                   | 7.59                             | 7.56                             |                          |
| Pyridine   | 3 <sup>3</sup> B <sub>2</sub>  | 7.88                                   | 7.91                             | 7.88                             |                          |
| Pyridine   | 1 <sup>3</sup> B <sub>1</sub>  | 4.55                                   | 4.59                             | 4.55                             |                          |
| Pyridine   | 1 <sup>3</sup> A <sub>2</sub>  | 5.48                                   | 5.54                             | 5.50                             |                          |
| Pyrazine   | 1 <sup>1</sup> B <sub>2u</sub> | 4.85                                   | 4.88                             | 4.86                             |                          |
| Pyrazine   | 1 <sup>1</sup> B <sub>1u</sub> | 6.89                                   | 6.92                             | 6.89                             |                          |
| Pyrazine   | 2 <sup>1</sup> B <sub>1u</sub> | 7.79                                   | 7.82                             | 7.79                             |                          |
| Pyrazine   | 2 <sup>1</sup> B <sub>2u</sub> | 7.65                                   | 7.68                             | 7.66                             |                          |
| Pyrazine   | 1 <sup>1</sup> B <sub>3g</sub> | 8.47                                   | 8.50                             | 8.47                             |                          |
| Pyrazine   | 2 <sup>1</sup> A <sub>g</sub>  | 8.61                                   | 8.61                             | 8.58                             |                          |
| Pyrazine   | 1 <sup>1</sup> B <sub>3u</sub> | 4.12                                   | 4.14                             | 4.12                             |                          |
| Pyrazine   | 1 <sup>1</sup> A <sub>u</sub>  | 4.70                                   | 4.72                             | 4.69                             |                          |
| Pyrazine   | 1 <sup>1</sup> B <sub>2g</sub> | 5.68                                   | 5.70                             | 5.68                             |                          |
| Pyrazine   | 1 <sup>1</sup> B <sub>1g</sub> | 6.41                                   | 6.43                             | 6.41                             |                          |
| Pyrimidine | 1 <sup>1</sup> B <sub>2</sub>  | 5.24                                   | 5.31                             | 5.24                             |                          |
| Pyrimidine | 2 <sup>1</sup> A <sub>1</sub>  | 6.64                                   | 6.63                             | 6.56                             |                          |
| Pyrimidine | 3 <sup>1</sup> A <sub>1</sub>  | 7.21                                   | 7.21                             | 7.14                             |                          |
| Pyrimidine | 2 <sup>1</sup> B <sub>2</sub>  | 7.64                                   | 7.71                             | 7.64                             |                          |
| Pyrimidine | 3 <sup>1</sup> B <sub>2</sub>  | 8.73                                   | 8.81                             | 8.74                             |                          |
| Pyrimidine | 4 <sup>1</sup> A <sub>1</sub>  | 9.19                                   | 9.19                             | 9.12                             |                          |
| Pyrimidine | 1 <sup>1</sup> B <sub>1</sub>  | 4.44                                   | 4.51                             | 4.44                             |                          |
| Pyrimidine | 1 <sup>1</sup> A <sub>2</sub>  | 4.81                                   | 4.87                             | 4.80                             |                          |
| Pyridazine | 2 <sup>1</sup> A <sub>1</sub>  | 5.18                                   | 5.18                             | 5.09                             | active space (1 1 3 3)10 |
| Pyridazine | 1 <sup>1</sup> B <sub>2</sub>  | 6.31                                   | 6.40                             | 6.31                             | active space (1 1 3 3)10 |
| Pyridazine | 2 <sup>1</sup> B <sub>2</sub>  | 7.29                                   | 7.38                             | 7.29                             | active space (1 1 3 3)10 |
| Pyridazine | 3 <sup>1</sup> A <sub>1</sub>  | 7.62                                   | 7.62                             | 7.53                             | active space (1 1 3 3)10 |
| Pyridazine | 1 <sup>1</sup> B <sub>1</sub>  | 3.78                                   | 3.87                             | 3.78                             | active space (1 1 3 3)10 |
| Pyridazine | 1 <sup>1</sup> A <sub>2</sub>  | 4.32                                   | 4.40                             | 4.31                             | active space (1 1 3 3)10 |
| Pyridazine | 2 <sup>1</sup> A <sub>2</sub>  | 5.77                                   | 5.86                             | 5.77                             | active space (1 1 3 3)10 |
| Pyridazine | 2 <sup>1</sup> B <sub>1</sub>  | 6.52                                   | 6.60                             | 6.52                             | active space (1 1 3 3)10 |
| Triazine   | 2 <sup>1</sup> A'              | 5.79                                   | 5.79                             | 5.64                             |                          |
| Triazine   | 3 <sup>1</sup> A'              | 7.25                                   | 7.26                             | 7.11                             |                          |

Table S7: ... continued

| Molecule     | State        | $V_i(\text{Thiel SI})^a$ | $V_i(\text{MS})^b$ | $V_i(\text{SS})^c$ | Comment                          |
|--------------|--------------|--------------------------|--------------------|--------------------|----------------------------------|
| Triazine     | 4 $^1A'$     | 7.49                     | 7.50               | 7.35               |                                  |
| Triazine     | 5 $^1A'$     | 8.99                     | 8.95               | 8.80               |                                  |
| Triazine     | 1 $^1A''$    | 4.60                     | 4.74               | 4.59               |                                  |
| Triazine     | 2 $^1A''$    | 4.66                     | 4.81               | 4.66               |                                  |
| Triazine     | 3 $^1A''$    | 4.71                     | 4.85               | 4.70               |                                  |
| Triazine     | 4 $^1A''$    | 4.71                     | 4.85               | 4.70               |                                  |
| Triazine     | 5 $^1A''$    | 7.72                     | 7.86               | 7.71               |                                  |
| Triazine     | 6 $^1A''$    | 7.72                     | 7.86               | 7.71               |                                  |
| Tetrazine    | 1 $^1B_{2u}$ | 4.91                     | 4.94               | 4.93               | active space (1 2 1 1 1 1 1 2)14 |
| Tetrazine    | 1 $^1B_{1u}$ | 6.96                     | 6.95               | 6.94               | active space (1 2 1 1 1 1 1 2)14 |
| Tetrazine    | 2 $^1B_{1u}$ | 7.43                     | 7.43               | 7.42               | active space (1 2 1 1 1 1 1 2)14 |
| Tetrazine    | 2 $^1B_{2u}$ | 8.15                     | 7.91               | 7.90               | significant difference           |
| Tetrazine    | 2 $^1B_{3g}$ | 8.32                     | 7.86               | 7.85               | significant difference           |
| Tetrazine    | 3 $^1A_g$    | 8.97                     | 8.03               | 8.02               | significant difference           |
| Tetrazine    | 1 $^1B_{3u}$ | 2.24                     | 2.30               | 2.29               | significant difference           |
| Tetrazine    | 1 $^1A_u$    | 3.48                     | 3.52               | 3.51               | active space (1 2 1 1 1 1 1 2)14 |
| Tetrazine    | 2 $^1A_g$    | 4.55                     | 4.66               | 4.65               | significant difference           |
| Tetrazine    | 1 $^1B_{1g}$ | 4.73                     | 4.74               | 4.73               | active space (1 2 1 1 1 1 1 2)14 |
| Tetrazine    | 1 $^1B_{2g}$ | 5.18                     | 5.20               | 5.19               | active space (1 2 1 1 1 1 1 2)14 |
| Tetrazine    | 1 $^1B_{3g}$ | 5.79                     | 5.87               | 5.86               | significant difference           |
| Tetrazine    | 2 $^1A_u$    | 5.47                     | 5.50               | 5.49               | active space (1 2 1 1 1 1 1 2)14 |
| Tetrazine    | 2 $^1B_{2g}$ | 6.07                     | 6.07               | 6.06               | active space (1 2 1 1 1 1 1 2)14 |
| Tetrazine    | 2 $^1B_{1g}$ | 6.38                     | 6.46               | 6.45               | significant difference           |
| Tetrazine    | 2 $^1B_{3u}$ | 6.77                     | 6.78               | 6.77               | active space (1 2 1 1 1 1 1 2)14 |
| Tetrazine    | 3 $^1B_{1g}$ | 6.74                     | 6.73               | 6.72               | active space (1 2 1 1 1 1 1 2)14 |
| Tetrazine    | 1 $^3B_{3u}$ | 1.56                     | 1.62               | 1.61               | significant difference           |
| Tetrazine    | 1 $^3A_u$    | 3.26                     | 3.29               | 3.28               | active space (1 2 1 1 1 1 1 2)14 |
| Tetrazine    | 1 $^3B_{1g}$ | 4.14                     | 4.14               | 4.13               | active space (1 2 1 1 1 1 1 2)14 |
| Tetrazine    | 1 $^3B_{1u}$ | 4.36                     | 4.38               | 4.37               | active space (1 2 1 1 1 1 1 2)14 |
| Tetrazine    | 1 $^3B_{2u}$ | 4.56                     | 4.40               | 4.39               | significant difference           |
| Tetrazine    | 1 $^3B_{2g}$ | 4.93                     | 4.95               | 4.94               | active space (1 2 1 1 1 1 1 2)14 |
| Tetrazine    | 2 $^3A_u$    | 5.02                     | 5.05               | 5.04               | active space (1 2 1 1 1 1 1 2)14 |
| Tetrazine    | 1 $^3B_{3g}$ | 5.50                     | 7.62               | 7.61               | significant difference           |
| Tetrazine    | 2 $^3B_{1u}$ | 5.40                     | 5.41               | 5.40               | active space (1 2 1 1 1 1 1 2)14 |
| Tetrazine    | 2 $^3B_{2g}$ | 5.97                     | 5.97               | 5.96               | active space (1 2 1 1 1 1 1 2)14 |
| Tetrazine    | 2 $^3B_{1g}$ | 6.31                     | 6.38               | 6.37               | significant difference           |
| Tetrazine    | 2 $^3B_{3u}$ | 6.54                     | 6.55               | 6.54               | active space (1 2 1 1 1 1 1 2)14 |
| Tetrazine    | 2 $^3B_{2u}$ | 7.10                     | 6.32               | 6.31               | significant difference           |
| Formaldehyde | 1 $^1A_2$    | 3.98                     | 4.14               | 3.99               |                                  |

Table S7: ... continued

| Molecule     | State        | $V_i$ (Thiel SI) <sup>a</sup> | $V_i$ (MS) <sup>b</sup> | $V_i$ (SS) <sup>c</sup> | Comment                                     |
|--------------|--------------|-------------------------------|-------------------------|-------------------------|---------------------------------------------|
| Formaldehyde | 1 $^1B_1$    | 9.14                          | 9.29                    | 9.13                    |                                             |
| Formaldehyde | 2 $^1A_1$    | 9.31                          | 9.32                    | 9.16                    |                                             |
| Formaldehyde | 1 $^3A_2$    | 3.58                          | 3.74                    | 3.58                    |                                             |
| Formaldehyde | 1 $^3A_1$    | 5.84                          | 5.99                    | 5.84                    |                                             |
| Acetone      | 1 $^1A_2$    | 4.42                          | 4.68                    | 4.43                    |                                             |
| Acetone      | 1 $^1B_1$    | 9.27                          | 10.65                   | 10.41                   | $V_i = 9.28$ eV with (1 2 0 1) active space |
| Acetone      | 2 $^1A_1$    | 9.31                          | 9.29                    | 9.05                    |                                             |
| Acetone      | 1 $^3A_2$    | 4.08                          | 4.34                    | 4.10                    |                                             |
| Acetone      | 1 $^3A_1$    | 6.03                          | 6.28                    | 6.04                    |                                             |
| Benzoquinone | 1 $^1B_{1g}$ | 2.78                          | 2.76                    | 2.76                    |                                             |
| Benzoquinone | 1 $^1A_u$    | 2.80                          | 2.77                    | 2.77                    |                                             |
| Benzoquinone | 1 $^1B_{3g}$ | 4.25                          | 4.25                    | 4.26                    |                                             |
| Benzoquinone | 2 $^1A_g$    | 4.51                          | 4.49                    | 4.49                    |                                             |
| Benzoquinone | 1 $^1B_{2g}$ | 5.66                          | 5.64                    | 5.65                    |                                             |
| Benzoquinone | 1 $^1B_{1u}$ | 5.29                          | 5.14                    | 5.14                    | significant difference                      |
| Benzoquinone | 1 $^1B_{3u}$ | 5.60                          | 5.64                    | 5.64                    |                                             |
| Benzoquinone | 2 $^1B_{2g}$ | 6.60                          | 6.59                    | 6.59                    |                                             |
| Benzoquinone | 2 $^1B_{1g}$ | 6.15                          | 6.13                    | 6.13                    |                                             |
| Benzoquinone | 2 $^1A_u$    | 6.05                          | 6.03                    | 6.04                    |                                             |
| Benzoquinone | 3 $^1A_g$    | 6.08                          | 6.06                    | 6.07                    |                                             |
| Benzoquinone | 2 $^1B_{3g}$ | 6.98                          | 6.96                    | 6.96                    |                                             |
| Benzoquinone | 1 $^1B_{2u}$ | 7.32                          | 7.32                    | 7.32                    |                                             |
| Benzoquinone | 2 $^1B_{1u}$ | 7.91                          | 7.04                    | 7.05                    | significant difference                      |
| Benzoquinone | 3 $^1B_{1u}$ | 7.35                          | 7.58                    | 7.58                    | significant difference                      |
| Benzoquinone | 3 $^1B_{1g}$ | 7.90                          | 7.88                    | 7.88                    |                                             |
| Benzoquinone | 3 $^1A_u$    | 7.90                          | 7.89                    | 7.89                    |                                             |
| Benzoquinone | 4 $^1A_g$    | 8.07                          | 8.05                    | 8.05                    |                                             |
| Benzoquinone | 5 $^1A_g$    | 8.11                          | 8.11                    | 8.11                    |                                             |
| Benzoquinone | 1 $^3B_{1g}$ | 2.63                          | 2.62                    | 2.62                    |                                             |
| Benzoquinone | 1 $^3A_u$    | 2.68                          | 2.66                    | 2.66                    |                                             |
| Benzoquinone | 1 $^3B_{1u}$ | 2.99                          | 2.98                    | 2.99                    |                                             |
| Benzoquinone | 1 $^3B_{3g}$ | 3.31                          | 3.32                    | 3.32                    |                                             |
| Formamide    | 1 $^1A''$    | 5.63                          | 5.76                    | 5.63                    |                                             |
| Formamide    | 2 $^1A'$     | 7.44                          | 7.39                    | 7.26                    |                                             |
| Formamide    | 3 $^1A'$     | 10.54                         | 10.54                   | 10.41                   |                                             |
| Formamide    | 1 $^3A''$    | 5.40                          | 5.52                    | 5.40                    |                                             |
| Formamide    | 1 $^3A'$     | 5.58                          | 5.81                    | 5.68                    | significant difference                      |
| Acetamide    | 1 $^1A''$    | 5.80                          | 5.81                    | 5.69                    | MS instead of SS                            |
| Acetamide    | 2 $^1A'$     | 7.27                          | 7.27                    | 7.15                    |                                             |

Table S7: ... continued

| Molecule    | State     | $V_i$ (Thiel SI) <sup>a</sup> | $V_i$ (MS) <sup>b</sup> | $V_i$ (SS) <sup>c</sup> | Comment          |
|-------------|-----------|-------------------------------|-------------------------|-------------------------|------------------|
| Acetamide   | 3 $^1A'$  | 10.09                         | 10.09                   | 9.97                    |                  |
| Acetamide   | 1 $^3A''$ | 5.53                          | 5.54                    | 5.41                    | MS instead of SS |
| Acetamide   | 1 $^3A'$  | 5.75                          | 5.76                    | 5.63                    | MS instead of SS |
| Propanamide | 1 $^1A''$ | 5.72                          | 5.84                    | 5.72                    |                  |
| Propanamide | 2 $^1A'$  | 7.20                          | 7.20                    | 7.08                    |                  |
| Propanamide | 3 $^1A'$  | 9.94                          | 9.94                    | 9.82                    |                  |
| Propanamide | 1 $^3A''$ | 5.44                          | 5.56                    | 5.44                    |                  |
| Propanamide | 1 $^3A'$  | 5.79                          | 5.86                    | 5.80                    |                  |
| Cytosine    | 2 $^1A'$  | 4.68                          | 4.67                    | 4.43                    |                  |
| Cytosine    | 1 $^1A''$ | 5.12                          | 5.37                    | 5.12                    |                  |
| Cytosine    | 3 $^1A'$  | 5.54                          | 5.53                    | 5.29                    |                  |
| Cytosine    | 4 $^1A'$  | 6.40                          | 6.40                    | 6.16                    |                  |
| Cytosine    | 2 $^1A''$ | 5.54                          | 5.78                    | 5.54                    |                  |
| Cytosine    | 5 $^1A'$  | 6.98                          | 6.97                    | 6.72                    |                  |
| Cytosine    | 6 $^1A'$  | 8.23                          | 8.22                    | 7.98                    |                  |
| Thymine     | 1 $^1A''$ | 4.94                          | 5.21                    | 4.95                    |                  |
| Thymine     | 2 $^1A'$  | 5.06                          | 5.06                    | 4.81                    |                  |
| Thymine     | 3 $^1A'$  | 6.15                          | 6.15                    | 5.90                    |                  |
| Thymine     | 2 $^1A''$ | 6.38                          | 6.64                    | 6.39                    |                  |
| Thymine     | 4 $^1A'$  | 6.52                          | 6.53                    | 6.28                    |                  |
| Thymine     | 3 $^1A''$ | 6.86                          | 7.11                    | 6.86                    |                  |
| Thymine     | 4 $^1A''$ | 7.43                          | 7.69                    | 7.44                    |                  |
| Thymine     | 5 $^1A'$  | 7.43                          | 7.43                    | 7.18                    |                  |
| Thymine     | 6 $^1A'$  | 8.48                          | 8.48                    | 8.23                    |                  |
| Uracil      | 1 $^1A''$ | 4.91                          | 5.18                    | 4.91                    |                  |
| Uracil      | 2 $^1A'$  | 5.23                          | 5.23                    | 4.96                    |                  |
| Uracil      | 3 $^1A'$  | 6.15                          | 6.15                    | 5.89                    |                  |
| Uracil      | 2 $^1A''$ | 6.27                          | 6.54                    | 6.28                    |                  |
| Uracil      | 3 $^1A''$ | 6.97                          | 7.25                    | 6.99                    |                  |
| Uracil      | 4 $^1A'$  | 6.75                          | 6.74                    | 6.48                    |                  |
| Uracil      | 4 $^1A''$ | 7.28                          | 7.55                    | 7.28                    |                  |
| Uracil      | 5 $^1A'$  | 7.42                          | 7.42                    | 7.15                    |                  |
| Adenine     | 2 $^1A'$  | 5.20                          | 5.20                    | 5.05                    |                  |
| Adenine     | 3 $^1A'$  | 5.29                          | 5.29                    | 5.14                    |                  |
| Adenine     | 1 $^1A''$ | 5.21                          | 5.34                    | 5.19                    |                  |
| Adenine     | 4 $^1A'$  | 6.35                          | 6.34                    | 6.20                    |                  |
| Adenine     | 5 $^1A'$  | 6.64                          | 6.64                    | 6.50                    |                  |
| Adenine     | 2 $^1A''$ | 5.97                          | 6.10                    | 5.96                    |                  |
| Adenine     | 6 $^1A'$  | 6.88                          | 6.87                    | 6.73                    |                  |

Table S7: ... continued

| Molecule | State     | $V_i(\text{Thiel SI})^a$ | $V_i(\text{MS})^b$ | $V_i(\text{SS})^c$ | Comment |
|----------|-----------|--------------------------|--------------------|--------------------|---------|
| Adenine  | $7\ ^1A'$ | 7.56                     | 7.56               | 7.41               |         |

<sup>a</sup> vertical excitation energy in eV reported in the SI of Ref. 51

<sup>b</sup> vertical excitation energy in eV with respect to the MS-CASPT2 ground state energy

<sup>c</sup> vertical excitation energy in eV with respect to the ground state calculated separately using SS-CASPT2

### S3.2 Ground State Energies of all Molecules

In Table S8 the ground state energies of all the molecules comprising the Thiel benchmark set<sup>51</sup> are given. SS-CASPT2 energies are obtained from calculations separately performed for the ground state. MS-CASPT2 energies refer to the standard calculations considering also the totally-symmetric excited state. For ethene and cyclopropene, only one totally symmetric state was considered in the standard calculations, i.e.,  $E_0(\text{SS}) = E_0(\text{MS})$ . For all other molecules  $\Delta E = E_0(\text{SS}) - E_0(\text{MS}) < 0$  and in average  $\Delta E = -0.11$  and  $-0.12$  eV for IPEA and NOIPEA, respectively.

Table S8: Multi-state (MS) and single-state (SS) CASPT2 ground state energies  $E_0$  in a.u. and energy differences  $\Delta E = E_0(\text{SS}) - E_0(\text{MS})$  in eV computed using the standard (NOIPEA) and the IPEA-shifted CASPT2 schemes of the 28 organic molecules comprising the Thiel set.

| CASPT2<br>Molecule | IPEA             |                  |            | NOIPEA           |                  |            |
|--------------------|------------------|------------------|------------|------------------|------------------|------------|
|                    | $E_0(\text{MS})$ | $E_0(\text{SS})$ | $\Delta E$ | $E_0(\text{MS})$ | $E_0(\text{SS})$ | $\Delta E$ |
| Ethene             | -78.351896       | -78.351896       | 0          | -78.354406       | -78.354406       | 0          |
| Butadiene          | -155.539670      | -155.537966      | -0.05      | -155.542562      | -155.540620      | -0.05      |
| Hexatriene         | -232.725149      | -232.724049      | -0.03      | -232.729251      | -232.727925      | -0.04      |
| Octatetraene       | -309.907851      | -309.906038      | -0.05      | -309.913359      | -309.911202      | -0.06      |
| Cyclopropene       | -116.281456      | -116.281456      | 0          | -116.284351      | -116.284351      | 0          |
| Cyclopentadiene    | -193.554776      | -193.549162      | -0.15      | -193.559650      | -193.552062      | -0.21      |
| Norbornadiene      | -270.730945      | -270.722900      | -0.22      | -270.738004      | -270.725892      | -0.33      |
| Benzene            | -231.589659      | -231.588814      | -0.02      | -231.593579      | -231.592899      | -0.02      |
| Naphthalene        | -384.806176      | -384.805100      | -0.03      | -384.813351      | -384.812090      | -0.03      |
| Furan              | -229.450981      | -229.444412      | -0.18      | -229.455435      | -229.447597      | -0.21      |
| Pyrrole            | -209.607140      | -209.604619      | -0.07      | -209.610722      | -209.607760      | -0.08      |
| Imidazole          | -225.643731      | -225.641324      | -0.07      | -225.646814      | -225.641830      | -0.14      |
| Pyridine           | -247.612808      | -247.611572      | -0.03      | -247.617116      | -247.615943      | -0.03      |
| Pyrazine           | -263.632297      | -263.631332      | -0.03      | -263.637382      | -263.636169      | -0.03      |
| Pyrimidine         | -263.640807      | -263.638098      | -0.07      | -263.645589      | -263.642647      | -0.08      |
| Pyridazine         | -263.603223      | -263.599990      | -0.09      | -263.608403      | -263.605167      | -0.09      |

Table S8: ... continued

| CASPT2<br>Molecule | IPEA             |                  |            | NOIPEA           |                  |            |
|--------------------|------------------|------------------|------------|------------------|------------------|------------|
|                    | $E_0(\text{MS})$ | $E_0(\text{SS})$ | $\Delta E$ | $E_0(\text{MS})$ | $E_0(\text{SS})$ | $\Delta E$ |
| Triazine           | -279.673849      | -279.668333      | -0.15      | -279.679333      | -279.672942      | -0.17      |
| Tetrazine          | -295.607594      | -295.607229      | -0.01      | -295.613885      | -295.613196      | -0.02      |
| Formaldehyde       | -114.248428      | -114.242714      | -0.16      | -114.253290      | -114.245651      | -0.21      |
| Acetone            | -192.666642      | -192.657638      | -0.24      | -192.659680      | -192.658967      | -0.02      |
| Benzoquinone       | -380.522020      | -380.522177      | -0.00      | -380.529017      | -380.527491      | -0.04      |
| Formamide          | -169.510604      | -169.505774      | -0.13      | -169.514406      | -169.508770      | -0.15      |
| Acetamide          | -208.714964      | -208.710485      | -0.12      | -208.718584      | -208.713392      | -0.14      |
| Propanamide        | -247.912175      | -247.907767      | -0.12      | -247.915757      | -247.910683      | -0.14      |
| Cytosine           | -393.989164      | -393.980088      | -0.25      | -393.993994      | -393.983402      | -0.29      |
| Thymine            | -453.066735      | -453.057455      | -0.25      | -453.070870      | -453.060908      | -0.27      |
| Uracil             | -413.864525      | -413.854729      | -0.27      | -413.868261      | -413.858021      | -0.28      |
| Adenine            | -466.175499      | -466.170173      | -0.14      | -466.181942      | -466.174967      | -0.19      |

### S3.3 Additional Computational Details

All calculations performed for the molecules in Thiel’s benchmark set used the same parameters as given in the Supporting Information of Ref. 51 with the exceptions of imidazole, pyridazine, and tetrazine. For these molecules, the number of orbitals or number of electrons in the active spaces were reported erroneously and we use the active spaces that we believe had been intended to use (see section S3.1). For all molecules, calculations have been performed using the IPEA shift values  $\varepsilon = -0.12, 0, 0.08, 0.1337, 0.16,$  and  $0.25$  for the TZVP basis set<sup>52</sup> and shift values of  $\varepsilon = 0, 0.1, 0.2, 0.25, 0.3, 0.4$  and  $0.5$  a.u. for the ANO-RCC basis set,<sup>53</sup> respectively.

### S3.4 Intruder State Problems

#### S3.4.1 General Considerations

In Table S10 in section S3.5, we present the CASPT2 vertical excitation computed using the TZVP basis set and different values of the IPEA shift. With the exception of the IPEA shift value, all calculations used the same CASPT2 parameters, e.g., level shift or number of states considered for each irreducible representation, as in the original benchmark study by Thiel et al.<sup>51</sup> Using these parameters and the recommended IPEA shift value of  $\varepsilon = 0.25$  a.u., all

calculations are free from intruder state problems. When the IPEA shift value is decreased, however, intruder state problems occurred in some cases. To understand this, we note that we consider only low-lying excited states. For these states, the energy difference to the first-order interaction space states, that appears in the denominator of the CASPT2 second-order energy correction, is usually positive (see section 2.1 in the main paper). Adding a positive energy contribution due to the IPEA shift increases these denominators. The IPEA shift, thus, partially takes the role of other shift techniques such as the level shift in damping the coupling to intruder states. The impact, however, is different for the states and depends on their character. When decreasing the IPEA shift value, the denominators in the second-order energy correction for some of the states will become smaller again, which, in the cases of denominators very close to zero, gives rise to intruder states. Since we do not want to change any other CASPT2 parameter of Thiel’s benchmark calculations for the sake of comparability –except the IPEA shift value –we need to exclude a number of states from our statistical evaluation due to intruder state problems, and we will discuss the individual cases in sections S3.4.2 and S3.4.3. Note that, from the beginning, our intention was to only consider the states reported in the Supporting Information of Ref. 51 although for some molecules, more states are computed.

The presence of intruder states was recognized by comparing the reference weights of the CASSCF wave function in the CASPT2 wave function. A reference weight that is significantly lower than that of the ground state can indicate intruder state problems. In the MOLCAS manual, when describing the investigation of the excited states of thiophene as an exemplary CASPT2 study, it is suggested that a difference of 10 % may be seen as significant when no level shift is used. We note that this suggestion seems to apply to the case where no IPEA shift is used as it was already presented for MOLCAS versions previous the MOLCAS6.4. Using a non-zero IPEA shift can already damp the coupling to intruder states, and, thus, an even smaller difference in the reference weights may have to be used as an indicator of the presence of intruder states when employing an IPEA-shifted CASPT2 variant. However, we emphasize at this stage that one should not use the IPEA shift technique as a substitute for the level shift technique. For both, the IPEA and the level shift technique, a “small” energy contribution is added to the energy difference of the reference state and the energies of the FOI space states. This energy contribution can damp the coupling to potential intruder states which is the reason why the level shift technique was introduced. Here, however, the size of the shift

does not possess any physical motivation. The addition of the energy contribution is at the cost of a change in the energy of the state. Using the level-shift as implemented in MOLCAS, this unphysical change in energy is removed –approximately at least –once the coupling with the intruder states is reduced to be conveniently small. The IPEA shift technique was not introduced to remove the coupling with intruder states but to correct for a proposed systematic underestimation of energies of open-shell states. Consequently, the energy shift introduced when using the IPEA-modified CASPT2 variant is not removed and the energy contributions due to the shift are not added evenly to all states (see section 2.2 in the main paper).

In the following, we report the individual cases of intruder state problems that appeared in the CASPT2 calculations using different IPEA shift values. For the case  $\varepsilon = 0$ , we will give detailed discussions in section S3.4.2 on how we handled each problem individually to establish a pattern of action. In section S3.4.3, we only report the individual states that we excluded from our data set due to intruder state problems for the cases  $0 < \varepsilon < 0.25$  a.u., and we briefly comment on the case of  $\varepsilon = -0.12$  a.u.

### S3.4.2 Intruder State Problems in NOIPEA-CASPT2 Calculations

**Hexatriene** The SS-CASPT2  $1^1B_u$  state of hexatriene possesses only a reference weight of  $\omega = 0.62$ , while for the ground state  $\omega(1^1A_g) = 0.79$ . This indicates intruder-state problems in the description of the  $1^1B_u$  SS-CASPT2 state. At MS-CASPT2 level, this state changes in order with the  $2^1B_u$  SS-CASPT2 state (only two states were calculated in  $1^1B_u$  symmetry). For our data set, we are only interested in the lowest-energy MS-CASPT2 state of this symmetry, i.e., the  $2^1B_u$  SS-CASPT2 state. We show the matrix of  $1^1B_u$  MS-CASPT2 state vectors in eq. (S3). Looking at the state vectors, one sees that both  $1^1B_u$  SS-CASPT2 states mix at MS-CASPT2 level and the coefficient of the first SS-CASPT2 state in the state vector of the  $1^1B_u$  MS-CASPT2 state amounts to  $c = 0.15$  (corresponding to a weight of  $|c|^2 = 2\%$ ). However, the difference in the total energies between the second SS-CASPT2 and the first MS-CASPT2 root is only 0.02 eV so that the mixing does not affect the energy significantly. Thus, we keep the  $1^1B_u$  state in our data set.

$${}^1B_u : \begin{pmatrix} 0.1493 & -0.9887 \\ -0.9887 & -0.1493 \end{pmatrix} \quad (\text{S3})$$

**Norbornadiene** In the SS-CASPT2 calculations of norbornadiene, the  $3\ ^1A_1$  state possesses a reference weight of only  $\omega = 0.51$  while for the ground state  $\omega(1\ ^1A_1) = 0.75$ . Unfortunately, the  $3\ ^1A_1$  state notably mixes with the ground state at MS-CASPT2 level [see eq. (S4)], resulting in an energy change of  $-0.28$  eV for the ground state when going from SS-CASPT2 to MS-CASPT2. Since the energy of the ground state may be corrupted by the presence of the worse described  $3\ ^1A_1$  state, we have to exclude all states of the norbornadiene molecule.

$${}^1A_1 : \begin{pmatrix} -0.9850 & -0.0790 & 0.1533 \\ 0.0268 & -0.9483 & -0.3160 \\ -0.1704 & 0.3071 & -0.9362 \end{pmatrix} \quad (\text{S4})$$

**Benzene** The CASPT2 calculations of benzene were conducted in the reduced  $C_s$  point-group symmetry. In the SS-CASPT2 calculations, we find low reference weights for the states  $4\ ^1A'$  (0.28),  $5\ ^1A'$  (0.23),  $4\ ^3A'$  (0.00), and  $5\ ^3A'$  (0.02). However, none of these states shows considerable mixing with the SS-CASPT2 of the same symmetry at the multi-state level [see eqs. (S5) and (S6)], so that the other states are not affected by their presence. The largest coefficient of any of these states in the MS-CASPT2 state vector is only  $c = 0.01$ . Thus, we will exclude the badly described states but keep all the other states in our data set.

$${}^1A' : \begin{pmatrix} 0.9999 & -0.0000 & 0.0000 & 0.0000 & 0.0000 & -0.0109 & -0.0000 \\ 0.0000 & 0.9999 & 0.0000 & -0.0000 & 0.0036 & -0.0000 & 0.0000 \\ 0.0000 & 0.0000 & -0.9987 & 0.0493 & 0.0000 & -0.0000 & -0.0000 \\ -0.0000 & 0.0000 & 0.0000 & 0.0000 & -0.0000 & 0.0000 & -1.0000 \\ 0.0109 & 0.0000 & -0.0000 & -0.0000 & 0.0000 & 0.9999 & 0.0000 \\ 0.0000 & 0.0036 & -0.0000 & 0.0000 & -0.9999 & 0.0000 & 0.0000 \\ -0.0000 & 0.0000 & 0.0493 & 0.9987 & 0.0000 & 0.0000 & 0.0000 \end{pmatrix} \quad (\text{S5})$$

$${}^3A' : \begin{pmatrix} -0.9999 & 0.0000 & -0.0000 & -0.0099 & -0.0000 & -0.0000 \\ -0.0000 & -0.0000 & 0.9999 & -0.0000 & -0.0024 & -0.0000 \\ -0.0099 & 0.0000 & 0.0000 & 0.9999 & 0.0000 & -0.0000 \\ 0.0000 & 1.0000 & 0.0000 & -0.0000 & -0.0000 & -0.0000 \\ -0.0000 & 0.0000 & 0.0000 & 0.0000 & 0.0000 & 1.0000 \\ -0.0000 & -0.0000 & -0.0024 & 0.0000 & -0.9999 & 0.0000 \end{pmatrix} \quad (\text{S6})$$

**Naphthalene** For naphthalene, two states with low reference weights were found in the calculations of the  ${}^1B_{2u}$  states, the SS-CASPT2 states  $3\ ^1B_{2u}$  ( $\omega = 0.28$ ) and  $4\ ^1B_{2u}$  ( $\omega = 0.14$ ). These states again show only minor mixing with the other SS-CASPT2 states at the MS-

CASPT2 level [see eq. (S7)]. Since we are only interested in describing the three other excited states, we can safely include these into our data set. For the purpose of illustration we report the change in the total energy of these three states when going from SS-CASPT2 to MS-CASPT2 treatment: 0.03, 0.04, and 0.07 eV for SS-CASPT2 roots 1, 2, and 5, respectively.

$${}^1B_{2u} : \begin{pmatrix} -0.0044 & 0.0034 & 0.9930 & -0.0935 & -0.0705 \\ 0.0026 & -0.0149 & 0.0800 & 0.9811 & -0.1750 \\ 0.0283 & 0.9994 & -0.0017 & 0.0156 & 0.0019 \\ 0.9995 & -0.0283 & 0.0046 & -0.0027 & 0.0044 \\ -0.0044 & -0.0042 & 0.0855 & 0.1682 & 0.9820 \end{pmatrix} \quad (S7)$$

**Furan** For furan, the  $3\ ^1B_2$  SS-CASPT2 state possesses a reference weight of only  $\omega = 0.59$ . It remains the  $3\ ^1B_2$  state in the multi-state treatment [see eq. (S8)]. We are only interested in describing the  $1\ ^1B_2$  state, which shows only a mixing with the  $3\ ^1B_2$  state, however, both states mix with the  $2\ ^1B_2$  state yielding energy changes when going from SS-CASPT2 to MS-CASPT2 of  $-0.15$ ,  $-0.06$ , and  $0.21$  eV for the roots 1, 2, and 3, respectively. Since the energy change for the  $1\ ^1B_2$  state is notable and we cannot know how much of it is caused by the indirect mixing to the  $3\ ^1B_2$  state, we will exclude the  $1\ ^1B_2$  state from our data set.

$${}^1B_2 : \begin{pmatrix} 0.9693 & 0.2456 & 0.0096 \\ -0.2398 & 0.9361 & 0.2570 \\ 0.0541 & -0.2515 & 0.9663 \end{pmatrix} \quad (S8)$$

**Pyrrrole** In the calculation of the  ${}^1B_2$  states of pyrrole, the third root showed a very small reference weight close to  $\omega = 0.00$ . Since this state mixes with the other two states of  ${}^1B_2$  symmetry at the multi-state CASPT2 level [see eq. (S9)], we exclude the  $1\ ^1B_2$  state of pyrrole from our analysis.

$${}^1B_2 : \begin{pmatrix} 0.9549 & -0.1941 & -0.2246 \\ 0.2579 & 0.9170 & 0.3039 \\ 0.1469 & -0.3481 & 0.9258 \end{pmatrix} \quad (S9)$$

**Imidazole** For imidazole, two excited  ${}^1A'$  states show notably smaller reference weights than the ground state:  $\omega(4\ ^1A') = 0.62$  and  $\omega(5\ ^1A') = 0.57$  whereas  $\omega(1\ ^1A') = 0.81$ . These two states show only very small mixing with the ground state [see eq. (S10)] and the total energy of the ground state changes only by 0.01 eV when going from SS-CASPT2 to MS-CASPT2. Thus, the ground state is rather unaffected by the presence of the two worse described states.

The other  ${}^1A'$  excited states show non-negligible mixing and their energy changes by 0.2-0.6 eV, and we, thus, exclude all  ${}^1A'$  excited states from our data set. Yet, we keep the ground state ( $1\ {}^1A'$ ) in our data allowing us to also keep the other states ( ${}^1A''$ ,  ${}^3A'$ , and  ${}^3A''$ ).

$${}^1A' : \begin{pmatrix} -0.9990 & -0.0094 & 0.0340 & -0.0183 & 0.0151 \\ -0.0292 & 0.6566 & -0.7306 & 0.0450 & 0.1792 \\ 0.0126 & 0.6447 & 0.6491 & 0.3513 & 0.1981 \\ 0.0255 & 0.2201 & 0.2019 & -0.9200 & 0.2520 \\ 0.0122 & -0.3235 & -0.0527 & 0.1661 & 0.9299 \end{pmatrix} \quad (\text{S10})$$

**Pyridine** In pyridine, there are two states that show a small reference weight: the SS-CASPT2 states  $3\ {}^3A_1$  ( $\omega = 0.52$ ) and  $2\ {}^3B_2$  ( $\omega = 0.33$ ). The  $3\ {}^3A_1$  state shows only very small mixing with the other two  ${}^3A_1$  states, so we exclude only the  $3\ {}^3A_1$  state [see eq. (S11)]. The  $2\ {}^3B_2$  state, however, mixes considerably with the other  ${}^3B_2$  states, so that we exclude all  ${}^3B_2$  states from the analysis.

$${}^3A_1 : \begin{pmatrix} -0.9823 & -0.1859 & -0.0224 \\ 0.1866 & -0.9817 & -0.0356 \\ -0.0154 & -0.0391 & 0.9991 \end{pmatrix} \quad (\text{S11})$$

$${}^3B_2 : \begin{pmatrix} -0.8652 & 0.4972 & 0.0648 \\ -0.2856 & -0.5949 & 0.7512 \\ 0.4121 & 0.6314 & 0.6568 \end{pmatrix} \quad (\text{S12})$$

**Pyrazine** In pyrazine, the  $2\ {}^1B_{1g}$  exhibits a reference of only  $\omega = 0.60$  compared to that of  $\omega = 0.80$  of the ground state. Since there is mixing at the MS-CASPT2 level with the  $1\ {}^1B_{1g}$ , we exclude the  ${}^1B_{1g}$  states from our data set.

$${}^1B_{1g} : \begin{pmatrix} 0.9298 & -0.3678 \\ 0.3678 & 0.9298 \end{pmatrix} \quad (\text{S13})$$

**Triazine** In the SS-CASPT2 calculations of triazine, two states are found with low reference weights:  $5\ {}^1A''$  ( $\omega = 0.13$ ) and  $6\ {}^1A''$  ( $\omega = 0.12$ ). Since there is only small mixing with the other states of  ${}^1A''$  symmetry [see eq. (S14)], we exclude these two states but keep the rest of

the  ${}^1A''$  states in our data set.

$${}^1A'' : \begin{pmatrix} -0.0110 & 0.0141 & -0.0059 & -0.9670 & -0.0982 & 0.2339 \\ -0.0032 & -0.0223 & 0.0238 & -0.0224 & 0.9505 & 0.3079 \\ 0.0376 & 0.0194 & -0.0386 & -0.2523 & 0.2937 & -0.9201 \\ 0.0110 & 0.0126 & 0.9988 & -0.0148 & -0.0117 & -0.0409 \\ 0.1270 & 0.9911 & -0.0124 & 0.0179 & 0.0157 & 0.0268 \\ 0.9910 & -0.1278 & -0.0081 & -0.0034 & -0.0110 & 0.0356 \end{pmatrix} \quad (\text{S14})$$

**Acetamide** For acetamide, we find the 2  ${}^3A'$  SS-CASPT2 state with a reference weight of  $\omega = 0.30$ . It shows a small mixing with the 1  ${}^3A'$  state [see eq. (S15)]. However, since we are only interested in the 1  ${}^3A'$  state, and its change in the total energy when going from SS-CASPT2 to MS-CASPT2 is only 0.02 eV, we keep the 1  ${}^3A'$  in our data set.

$${}^3A' : \begin{pmatrix} 0.9961 & -0.0878 \\ 0.0878 & 0.9961 \end{pmatrix} \quad (\text{S15})$$

**Thymine** For thymine, we find two SS-CASPT2 states with low reference weights: 3  ${}^1A''$  ( $\omega = 0.55$ ) and 4  ${}^1A''$  ( $\omega = 0.14$ ). The 4  ${}^1A''$  state does not mix with the first two roots, however, the 3  ${}^1A''$  state does [see eq. (S16)]. Thus, we exclude all  ${}^1A''$  states from our data set.

$${}^1A'' : \begin{pmatrix} -0.0079 & 0.9381 & 0.3447 & -0.0303 \\ -0.0045 & 0.0743 & -0.2863 & -0.9552 \\ -0.0205 & -0.3381 & 0.8937 & -0.2941 \\ 0.9997 & 0.0008 & 0.0197 & -0.0106 \end{pmatrix} \quad (\text{S16})$$

**Adenine** For adenine, we find two SS-CASPT2 states with low reference weights: 3  ${}^1A''$  ( $\omega = 0.18$ ) and 4  ${}^1A''$  ( $\omega = 0.01$ ). However, since these states do not mix with the other  ${}^1A''$  states [see eq.(S17)] and we are only interested in the first two roots, we do not need to exclude any states of interest from our data set.

$${}^1A'' : \begin{pmatrix} 0.0004 & -0.0007 & -0.9747 & 0.2231 \\ -0.0001 & -0.0048 & 0.2231 & 0.9747 \\ 0.0008 & 0.9999 & 0.0003 & 0.0048 \\ -0.9999 & 0.0008 & -0.0005 & -0.0000 \end{pmatrix} \quad (\text{S17})$$

### S3.4.3 Intruder State Problems in IPEA-CASPT2 Calculations

In Table S9 we show a list of excited states that we exclude from our data set due to possible intruder state problems. These excited states were obtained from CASPT2 calculations using IPEA shifts of  $\varepsilon = 0.08, 0.1337, \text{ and } 0.16$  a.u. In the previous section, we have discussed in detail all intruder state problems that occur when the IPEA shift is set to zero. We note again, that our interest was only directed at states reported in the Supporting Information of Ref. 51. In some cases, the intruder state problem affected only states that did not lie in our range of interest. When there was only negligible coupling with these states at the multi-state CASPT2 level, we felt it safe to keep the rest of states computed in the same calculation in our data set. However, when the coupling was larger or one of states under our consideration was directly affected with an intruder state problem, we excluded these states (Table S9) from our test set (for additional discussion how to handle intruder state problem see section 5.1 in the main paper).

Table S9: Individual states from calculations using IPEA shift values of  $\varepsilon = 0.08, 0.1337, \text{ and } 0.16$  a.u., that were excluded from our data set due to intruder state problems.

| Molecule      | State                        | IPEA Shift $\varepsilon$ [a.u.] |
|---------------|------------------------------|---------------------------------|
| Octatetraene  | $3\ ^1B_u$                   | 0.08                            |
| Norbornadiene | all states                   | 0.08, 0.1337, and 0.16          |
| Naphthalene   | $n\ ^1B_{3u}$ ( $n = 2, 3$ ) | 0.16                            |
| Furan         | $1\ ^1B_2$                   | 0.08, 0.1337, and 0.16          |
| Pyrrrole      | $1\ ^1B_2$                   | 0.08, 0.1337, and 0.16          |
| Imidazole     | $n\ ^1A'$ ( $n = 2 - 4$ )    | 0.08 and 0.16                   |
| Pyridine      | $3\ ^3A_1$                   | 0.08                            |
| Pyrazine      | $1\ ^1B_{1g}$                | 0.08 and 0.1337                 |
| Benzoquinone  | $2\ ^1A_u$                   | 0.1337 and 0.16                 |
| Thymine       | $6\ ^1A'$                    | 0.08                            |
| Uracil        | $n\ ^1A''$ ( $n = 1 - 4$ )   | 0.1337                          |

We have also performed calculations with a negative IPEA shift parameter, namely,  $\varepsilon = -0.12$  a.u. Here, we could obtain meaningful data only for a very small number of molecules due to significant intruder state problems. The intruder state problem almost always affected also the ground state of the molecule making it necessary to exclude all excited states of most molecules. Thus, instead of listing all the states we had to exclude, we ask the reader to simply

inspect the small number of states reported in Table S10 for  $\varepsilon = -0.12$  a.u.

### S3.5 CASPT2 Results for Thiel’s Benchmark Set

In Table S10 we present the MS-CASPT2 vertical excitation energies of the states included in the Thiel benchmark set obtained using the TZVP basis set and different values of the IPEA shift parameter  $\varepsilon$ . Except the IPEA shift, all other parameters were adopted from the initial CASPT2 study of Thiel et al.<sup>51</sup> As discussed in the preceding section, the variation of the IPEA shift value from the recommended  $\varepsilon = 0.25$  a.u. leads to intruder state problems for a small number of states. Their energies are still reported in Table S10 (marked with an asterisk) but are excluded from any statistical evaluation. Note that we use only MS-CASPT2 energies as the reference energies of the ground states in contrast to the approach by Thiel et al. (see section 5.1 in the main paper). Alongside the MS-CASPT2 vertical excitation energies, we also print the experimental excitation energies compiled by Thiel et al.<sup>51</sup> As was done for our literature survey (see section 3 in the main paper), when several experimental excitation energies were available, we use the average value for comparison.

Table S10: Vertical excitation energies at the MS-CASPT2 level of theory computed using the TVZP basis set and different values of the IPEA shift as well as experimental excitation energies for the 28 organic molecules of the Thiel benchmark set. All energies are given in eV. Experimental energies were adopted from Ref. 51 (see Supporting Information of Ref. 51 for references to the original publications). Entries marked with an asterisk (\*) correspond to states experiencing intruder state problems and will be excluded from statistical evaluation.

| TZVP Basis Set |              | CASPT2 with IPEA shift $\varepsilon$ [a.u.] = |      |      |        |      |      | Experiment |
|----------------|--------------|-----------------------------------------------|------|------|--------|------|------|------------|
| Molecule       | State        | -0.12                                         | 0    | 0.08 | 0.1337 | 0.16 | 0.25 |            |
| Ethene         | 1 $^1B_{1u}$ | 8.23                                          | 8.34 | 8.48 | 8.45   | 8.41 | 8.54 | 7.82       |
| Ethene         | 1 $^3B_{1u}$ | 4.34                                          | 4.39 | 4.45 | 4.44   | 4.42 | 4.48 | 4.48       |
| Butadiene      | 1 $^1B_u$    |                                               | 6.11 | 6.24 | 6.31   | 6.35 | 6.47 | 5.83       |
| Butadiene      | 2 $^1A_g$    | 6.07                                          | 6.32 | 6.43 | 6.49   | 6.53 | 6.62 |            |
| Butadiene      | 1 $^3B_u$    |                                               | 3.19 | 3.26 | 3.30   | 3.32 | 3.39 | 3.22       |
| Butadiene      | 1 $^3A_g$    | 4.82                                          | 4.97 | 5.05 | 5.10   | 5.13 | 5.21 | 4.91       |
| Hexatriene     | 1 $^1B_u$    |                                               | 4.96 | 5.09 | 5.18   | 5.22 | 5.35 | 4.93       |
| Hexatriene     | 2 $^1A_g$    |                                               | 5.10 | 5.22 | 5.29   | 5.32 | 5.42 | 5.21       |
| Hexatriene     | 1 $^3B_u$    |                                               | 2.52 | 2.61 | 2.66   | 2.68 | 2.74 | 2.61       |
| Hexatriene     | 1 $^3A_g$    |                                               | 4.06 | 4.17 | 4.23   | 4.25 | 4.34 | 4.11       |
| Octatetraene   | 2 $^1A_g$    |                                               | 4.33 | 4.45 | 4.52   | 4.55 | 4.64 | 3.59       |
| Octatetraene   | 1 $^1B_u$    |                                               | 4.37 | 4.51 | 4.59   | 4.63 | 4.75 | 4.41       |
| Octatetraene   | 2 $^1B_u$    |                                               | 5.34 | 5.53 | 5.61   | 5.65 | 5.79 | 5.88       |

Table S10: ... continued

| TZVP Basis Set  |              | CASPT2 with IPEA shift $\varepsilon$ [a.u.] = |       |       |        |       |      | Experiment |
|-----------------|--------------|-----------------------------------------------|-------|-------|--------|-------|------|------------|
| Molecule        | State        | -0.12                                         | 0     | 0.08  | 0.1337 | 0.16  | 0.25 |            |
| Octatetraene    | 3 $^1A_g$    |                                               | 5.40  | 5.76  | 5.92   | 5.98  | 6.19 |            |
| Octatetraene    | 4 $^1A_g$    |                                               | 6.95  | 7.20  | 7.31   | 7.37  | 7.53 |            |
| Octatetraene    | 3 $^1B_u$    |                                               | 7.29  | 1.47* | 7.36   | 7.72  | 8.09 |            |
| Octatetraene    | 1 $^3B_u$    |                                               | 2.15  | 2.25  | 2.29   | 2.31  | 2.38 | 2.10       |
| Octatetraene    | 1 $^3A_g$    |                                               | 3.44  | 3.57  | 3.63   | 3.66  | 3.75 | 3.55       |
| Cyclopropene    | 1 $^1B_1$    | 6.44                                          | 6.56  | 6.63  | 6.67   | 6.69  | 6.76 | 6.45       |
| Cyclopropene    | 1 $^1B_2$    | 6.59                                          | 6.77  | 6.87  | 6.94   | 6.97  | 7.06 | 7.10       |
| Cyclopropene    | 1 $^3B_2$    | 4.16                                          | 4.23  | 4.27  | 4.30   | 4.31  | 4.35 | 4.16       |
| Cyclopropene    | 1 $^3B_1$    | 6.15                                          | 6.29  | 6.36  | 6.41   | 6.43  | 6.51 | 6.10       |
| Cyclopentadiene | 1 $^1B_2$    |                                               | 5.36  | 5.46  | 5.53   | 5.56  | 5.67 | 5.30       |
| Cyclopentadiene | 2 $^1A_1$    |                                               | 5.82  | 6.00  | 6.11   | 6.16  | 6.31 | 6.20       |
| Cyclopentadiene | 3 $^1A_1$    |                                               | 7.80  | 8.07  | 8.22   | 8.30  | 8.52 | 7.90       |
| Cyclopentadiene | 1 $^3B_2$    |                                               | 3.27  | 3.31  | 3.35   | 3.37  | 3.44 | 3.10       |
| Cyclopentadiene | 1 $^3A_1$    |                                               | 5.04  | 5.10  | 5.15   | 5.18  | 5.26 |            |
| Norbornadiene   | 1 $^1A_2$    |                                               | 5.26* | 5.34* | 5.42*  | 5.45* | 5.56 | 5.24       |
| Norbornadiene   | 1 $^1B_2$    |                                               | 5.90* | 6.03* | 6.13*  | 6.17* | 6.33 | 5.96       |
| Norbornadiene   | 2 $^1B_2$    |                                               | 7.05* | 7.22* | 7.33*  | 7.38* | 7.54 | 6.68       |
| Norbornadiene   | 2 $^1A_2$    |                                               | 7.30* | 7.40* | 7.49*  | 7.53* | 7.67 | 7.50       |
| Norbornadiene   | 2 $^1A_1$    |                                               | 7.63* | 7.78* | 7.85*  | 7.86* | 7.97 |            |
| Norbornadiene   | 1 $^3A_2$    |                                               | 3.76* | 3.83* | 3.88*  | 3.90* | 3.97 | 3.44       |
| Norbornadiene   | 1 $^3B_2$    |                                               | 4.22* | 4.28* | 4.33*  | 4.36* | 4.44 | 3.90       |
| Benzene         | 2 $^1A'$     |                                               | 4.73  | 4.84  | 4.90   | 4.93  | 5.04 | 4.90       |
| Benzene         | 3 $^1A'$     |                                               | 5.95  | 6.13  | 6.23   | 6.28  | 6.44 | 6.20       |
| Benzene         | 4 $^1A'$     |                                               | 6.43  | 6.69  | 6.84   | 6.91  | 7.13 | 6.94       |
| Benzene         | 5 $^1A'$     |                                               | 6.43  | 6.69  | 6.84   | 6.91  | 7.14 | 6.94       |
| Benzene         | 6 $^1A'$     |                                               | 7.50* | 7.89  | 7.99   | 8.03  | 8.17 | 7.80       |
| Benzene         | 7 $^1A'$     |                                               | 7.54* | 7.89  | 8.00   | 8.05  | 8.20 | 7.80       |
| Benzene         | 1 $^3A'$     |                                               | 3.91  | 4.00  | 4.06   | 4.09  | 4.17 | 3.94       |
| Benzene         | 2 $^3A'$     |                                               | 4.50  | 4.66  | 4.74   | 4.78  | 4.90 | 4.76       |
| Benzene         | 3 $^3A'$     |                                               | 4.50  | 4.67  | 4.75   | 4.79  | 4.90 | 4.76       |
| Benzene         | 4 $^3A'$     |                                               | 5.27  | 5.44  | 5.56   | 5.61  | 5.77 | 5.60       |
| Benzene         | 5 $^3A'$     |                                               | 4.11* | 7.07  | 7.18   | 7.23  | 7.37 | 7.49       |
| Benzene         | 6 $^3A'$     |                                               | 5.70* | 7.08  | 7.19   | 7.24  | 7.38 | 7.49       |
| Naphthalene     | 1 $^1B_{3u}$ |                                               | 3.93  | 4.06  | 4.13   | 4.17  | 4.27 | 3.99       |
| Naphthalene     | 1 $^1B_{2u}$ |                                               | 4.44  | 4.56  | 4.65   | 4.68  | 4.80 | 4.58       |
| Naphthalene     | 2 $^1A_g$    |                                               | 5.36  | 5.57  | 5.67   | 5.72  | 5.87 | 5.51       |
| Naphthalene     | 1 $^1B_{1g}$ |                                               | 5.45  | 5.71  | 5.82   | 5.87  | 6.02 | 5.25       |
| Naphthalene     | 2 $^1B_{3u}$ |                                               | 5.43  | 5.69  | 5.84   | 5.77* | 6.09 | 5.69       |

Table S10: ... continued

| TZVP Basis Set |              | CASPT2 with IPEA shift $\varepsilon$ [a.u.] = |       |       |        |       |       | Experiment |
|----------------|--------------|-----------------------------------------------|-------|-------|--------|-------|-------|------------|
| Molecule       | State        | -0.12                                         | 0     | 0.08  | 0.1337 | 0.16  | 0.25  |            |
| Naphthalene    | 2 $^1B_{1g}$ |                                               | 5.98  | 6.17  | 6.29   | 6.34  | 6.51  |            |
| Naphthalene    | 2 $^1B_{2u}$ |                                               | 5.92  | 6.06  | 6.17   | 6.22  | 6.36  | 6.07       |
| Naphthalene    | 3 $^1A_g$    |                                               | 6.06  | 6.32  | 6.45   | 6.50  | 6.67  | 6.03       |
| Naphthalene    | 3 $^1B_{2u}$ |                                               | 7.53  | 6.19  | 7.71   | 8.00  | 8.20  | 7.57       |
| Naphthalene    | 3 $^1B_{3u}$ |                                               | 7.21  | 7.45  | 7.56   | 6.05* | 7.78  |            |
| Naphthalene    | 1 $^3B_{2u}$ |                                               | 2.86  | 3.01  | 3.08   | 3.11  | 3.20  |            |
| Naphthalene    | 1 $^3B_{3u}$ |                                               | 3.88  | 4.06  | 4.14   | 4.17  | 4.29  |            |
| Naphthalene    | 1 $^3B_{1g}$ |                                               | 4.20  | 4.35  | 4.41   | 4.45  | 4.55  |            |
| Naphthalene    | 2 $^3B_{2u}$ |                                               | 4.40  | 4.52  | 4.58   | 4.61  | 4.71  |            |
| Naphthalene    | 2 $^3B_{3u}$ |                                               | 4.55  | 4.71  | 4.81   | 4.85  | 5.00  |            |
| Naphthalene    | 1 $^3A_g$    |                                               | 5.12  | 5.31  | 5.40   | 5.44  | 5.56  |            |
| Naphthalene    | 2 $^3B_{1g}$ |                                               | 5.68  | 5.89  | 6.01   | 6.07  | 6.24  |            |
| Naphthalene    | 2 $^3A_g$    |                                               | 5.85  | 6.09  | 6.20   | 6.25  | 6.42  |            |
| Naphthalene    | 3 $^3A_g$    |                                               | 6.06  | 6.28  | 6.40   | 6.45  | 6.62  |            |
| Naphthalene    | 3 $^3B_{1g}$ |                                               | 6.16  | 6.37  | 6.47   | 6.52  | 6.67  |            |
| Furan          | 1 $^1B_2$    |                                               | 6.12* | 6.29* | 6.32*  | 9.23* | 6.57  | 6.06       |
| Furan          | 2 $^1A_1$    |                                               | 6.08  | 6.23  | 6.32   | 6.37  | 6.50  |            |
| Furan          | 3 $^1A_1$    |                                               | 7.17  | 7.59  | 7.80   | 7.89  | 8.17  | 7.82       |
| Furan          | 1 $^3B_2$    |                                               | 4.19  | 4.24  | 4.28   | 4.30  | 4.35  | 4.02       |
| Furan          | 1 $^3A_1$    |                                               | 5.39  | 5.49  | 5.55   | 5.58  | 5.67  | 5.22       |
| Pyrrole        | 2 $^1A_1$    |                                               | 5.89  | 6.04  | 6.13   | 6.17  | 6.31  |            |
| Pyrrole        | 1 $^1B_2$    |                                               | 5.95* | 6.22* | 6.34*  | 6.40* | 6.40* | 5.98       |
| Pyrrole        | 3 $^1A_1$    |                                               | 7.44  | 7.73  | 7.89   | 7.95  | 8.17  | 7.54       |
| Pyrrole        | 1 $^3B_2$    |                                               | 4.39  | 4.45  | 4.49   | 4.51  | 4.58  | 4.21       |
| Pyrrole        | 1 $^3A_1$    |                                               | 5.25  | 5.38  | 5.45   | 5.48  | 5.59  | 5.10       |
| Imidazole      | 1 $^1A''$    |                                               | 6.64  | 6.72  | 6.77   | 6.79  | 6.87  |            |
| Imidazole      | 2 $^1A'$     |                                               | 5.55* | 5.80* | 5.94   | 6.00* | 6.19  | 6.00       |
| Imidazole      | 3 $^1A'$     |                                               | 6.49* | 6.65* | 6.74   | 6.79* | 6.93  | 6.53       |
| Imidazole      | 2 $^1A''$    |                                               | 7.71  | 7.80  | 7.85   | 7.88  | 7.97  |            |
| Imidazole      | 4 $^1A'$     |                                               | 7.24* | 7.65* | 7.83   | 7.91* | 8.16  |            |
| Imidazole      | 1 $^3A'$     |                                               | 4.45  | 4.55  | 4.61   | 4.63  | 4.72  |            |
| Imidazole      | 2 $^3A'$     |                                               | 5.44  | 5.57  | 5.65   | 5.69  | 5.80  |            |
| Imidazole      | 1 $^3A''$    |                                               | 6.19  | 6.27  | 6.32   | 6.34  | 6.42  |            |
| Imidazole      | 3 $^3A'$     |                                               | 6.03  | 6.22  | 6.32   | 6.37  | 6.51  |            |
| Imidazole      | 4 $^3A'$     |                                               | 7.20  | 7.30  | 7.37   | 7.40  | 7.50  |            |
| Imidazole      | 2 $^3A''$    |                                               | 7.30  | 7.40  | 7.46   | 7.49  | 7.58  |            |
| Pyridine       | 1 $^1B_2$    |                                               | 4.87  | 4.95  | 4.99   | 5.01  | 5.08  | 4.99       |
| Pyridine       | 2 $^1A_1$    |                                               | 5.60  | 5.95  | 6.11   | 6.18  | 6.39  | 6.38       |

Table S10: ... continued

| TZVP Basis Set |              | CASPT2 with IPEA shift $\varepsilon$ [a.u.] = |       |       |        |      |      | Experiment |
|----------------|--------------|-----------------------------------------------|-------|-------|--------|------|------|------------|
| Molecule       | State        | -0.12                                         | 0     | 0.08  | 0.1337 | 0.16 | 0.25 |            |
| Pyridine       | 3 $^1A_1$    |                                               | 6.73  | 7.00  | 7.16   | 7.23 | 7.46 | 7.22       |
| Pyridine       | 2 $^1B_2$    |                                               | 6.91  | 7.08  | 7.17   | 7.21 | 7.33 |            |
| Pyridine       | 4 $^1A_1$    |                                               | 8.37  | 8.47  | 8.54   | 8.58 | 8.69 |            |
| Pyridine       | 3 $^1B_2$    |                                               | 8.46  | 8.52  | 8.57   | 8.59 | 8.66 |            |
| Pyridine       | 1 $^1B_1$    |                                               | 4.97  | 5.05  | 5.10   | 5.12 | 5.19 | 4.59       |
| Pyridine       | 1 $^1A_2$    |                                               | 5.29  | 5.38  | 5.43   | 5.45 | 5.53 | 5.43       |
| Pyridine       | 1 $^3A_1$    |                                               | 4.03  | 4.13  | 4.19   | 4.22 | 4.30 | 4.10       |
| Pyridine       | 1 $^3B_2$    |                                               | 4.26* | 4.47  | 4.57   | 4.62 | 4.75 | 4.84       |
| Pyridine       | 2 $^3A_1$    |                                               | 4.66  | 4.83  | 4.91   | 4.95 | 5.07 |            |
| Pyridine       | 2 $^3B_2$    |                                               | 5.34* | 5.72  | 5.84   | 5.89 | 6.06 |            |
| Pyridine       | 3 $^3A_1$    |                                               | 6.96* | 7.25* | 7.40   | 7.44 | 7.59 |            |
| Pyridine       | 3 $^3B_2$    |                                               | 7.62* | 7.71  | 7.78   | 7.81 | 7.91 |            |
| Pyridine       | 1 $^3B_1$    |                                               | 4.35  | 4.43  | 4.48   | 4.51 | 4.59 |            |
| Pyridine       | 1 $^3A_2$    |                                               | 5.26  | 5.36  | 5.42   | 5.45 | 5.54 |            |
| Pyrazine       | 1 $^1B_{2u}$ |                                               | 4.49  | 4.64  | 4.72   | 4.76 | 4.88 | 4.81       |
| Pyrazine       | 1 $^1B_{1u}$ |                                               | 6.51  | 6.65  | 6.74   | 6.78 | 6.92 | 6.51       |
| Pyrazine       | 2 $^1B_{1u}$ |                                               | 7.20  | 7.43  | 7.56   | 7.62 | 7.82 | 7.67       |
| Pyrazine       | 2 $^1B_{2u}$ |                                               | 7.06  | 7.28  | 7.42   | 7.48 | 7.68 | 7.67       |
| Pyrazine       | 1 $^1B_{3g}$ |                                               | 8.13  | 8.29  | 8.38   | 8.42 | 8.50 |            |
| Pyrazine       | 2 $^1A_g$    |                                               | 8.10  | 8.31  | 8.41   | 8.46 | 8.61 |            |
| Pyrazine       | 1 $^1B_{3u}$ |                                               | 3.83  | 3.94  | 4.01   | 4.04 | 4.14 | 3.83       |
| Pyrazine       | 1 $^1A_u$    |                                               | 4.22  | 4.42  | 4.52   | 4.57 | 4.72 |            |
| Pyrazine       | 1 $^1B_{2g}$ |                                               | 5.40  | 5.51  | 5.58   | 5.60 | 5.70 | 5.46       |
| Pyrazine       | 1 $^1B_{1g}$ |                                               | 5.85* | 6.12* | 6.22*  | 6.26 | 6.43 | 6.10       |
| Pyrimidine     | 1 $^1B_2$    |                                               | 4.89  | 5.10  | 5.17   | 5.20 | 5.31 | 5.12       |
| Pyrimidine     | 2 $^1A_1$    |                                               | 6.08  | 6.33  | 6.44   | 6.48 | 6.63 | 6.70       |
| Pyrimidine     | 3 $^1A_1$    |                                               | 6.56  | 6.81  | 6.95   | 7.01 | 7.21 | 7.57       |
| Pyrimidine     | 2 $^1B_2$    |                                               | 6.21  | 7.30  | 7.44   | 7.51 | 7.71 | 7.57       |
| Pyrimidine     | 3 $^1B_2$    |                                               | 8.37  | 8.55  | 8.64   | 8.68 | 8.81 |            |
| Pyrimidine     | 4 $^1A_1$    |                                               | 8.83  | 8.95  | 9.03   | 9.07 | 9.19 |            |
| Pyrimidine     | 1 $^1B_1$    |                                               | 4.24  | 4.34  | 4.40   | 4.42 | 4.51 | 4.16       |
| Pyrimidine     | 1 $^1A_2$    |                                               | 4.56  | 4.67  | 4.74   | 4.77 | 4.87 | 4.62       |
| Pyridazine     | 2 $^1A_1$    |                                               | 4.84  | 4.96  | 5.04   | 5.07 | 5.18 | 4.95       |
| Pyridazine     | 1 $^1B_2$    |                                               | 5.76  | 6.03  | 6.16   | 6.22 | 6.40 | 6.35       |
| Pyridazine     | 2 $^1B_2$    |                                               | 6.63  | 6.93  | 7.09   | 7.16 | 7.38 | 7.20       |
| Pyridazine     | 3 $^1A_1$    |                                               | 6.84  | 7.15  | 7.31   | 7.39 | 7.62 | 7.20       |
| Pyridazine     | 1 $^1B_1$    |                                               | 3.56  | 3.67  | 3.74   | 3.77 | 3.87 | 3.30       |
| Pyridazine     | 1 $^1A_2$    |                                               | 3.99  | 4.15  | 4.24   | 4.28 | 4.40 |            |

Table S10: ... continued

| TZVP Basis Set |              | CASPT2 with IPEA shift $\varepsilon$ [a.u.] = |      |      |        |      |      | Experiment |
|----------------|--------------|-----------------------------------------------|------|------|--------|------|------|------------|
| Molecule       | State        | -0.12                                         | 0    | 0.08 | 0.1337 | 0.16 | 0.25 |            |
| Pyridazine     | 2 $^1A_2$    |                                               | 5.47 | 5.62 | 5.70   | 5.74 | 5.86 | 5.30       |
| Pyridazine     | 2 $^1B_1$    |                                               | 6.15 | 6.33 | 6.42   | 6.47 | 6.60 | 5.75       |
| Triazine       | 2 $^1A'$     |                                               | 5.50 | 5.60 | 5.66   | 5.69 | 5.79 | 5.70       |
| Triazine       | 3 $^1A'$     |                                               | 6.47 | 6.94 | 7.06   | 7.11 | 7.26 | 6.86       |
| Triazine       | 4 $^1A'$     |                                               | 6.77 | 6.98 | 7.16   | 7.25 | 7.50 | 7.76       |
| Triazine       | 5 $^1A'$     |                                               | 7.97 | 8.54 | 8.70   | 8.77 | 8.95 |            |
| Triazine       | 1 $^1A''$    |                                               | 4.18 | 4.41 | 4.52   | 4.58 | 4.74 |            |
| Triazine       | 2 $^1A''$    |                                               | 4.38 | 4.52 | 4.62   | 4.66 | 4.81 | 4.59       |
| Triazine       | 3 $^1A''$    |                                               | 4.41 | 4.54 | 4.65   | 4.69 | 4.85 | 3.97       |
| Triazine       | 4 $^1A''$    |                                               | 4.45 | 4.56 | 4.67   | 4.71 | 4.85 | 3.97       |
| Triazine       | 5 $^1A''$    | -12.64*                                       |      | 7.31 | 7.61   | 7.68 | 7.86 | 6.15       |
| Triazine       | 6 $^1A''$    | -10.36*                                       |      | 7.42 | 7.63   | 7.69 | 7.86 | 6.15       |
| Tetrazine      | 1 $^1B_{2u}$ |                                               | 4.54 | 4.69 | 4.78   | 4.82 | 4.94 | 4.99       |
| Tetrazine      | 1 $^1B_{1u}$ |                                               | 6.33 | 6.56 | 6.70   | 6.76 | 6.95 | 7.10       |
| Tetrazine      | 2 $^1B_{1u}$ |                                               | 6.90 | 7.09 | 7.20   | 7.25 | 7.43 | 7.60       |
| Tetrazine      | 2 $^1B_{2u}$ |                                               | 7.24 | 7.52 | 7.66   | 7.72 | 7.91 | 8.30       |
| Tetrazine      | 2 $^1B_{3g}$ |                                               | 7.01 | 7.34 | 7.52   | 7.60 | 7.86 |            |
| Tetrazine      | 3 $^1A_g$    |                                               | 6.97 | 7.44 | 7.66   | 7.75 | 8.03 |            |
| Tetrazine      | 1 $^1B_{3u}$ |                                               | 1.98 | 2.10 | 2.17   | 2.20 | 2.30 | 2.30       |
| Tetrazine      | 1 $^1A_u$    |                                               | 3.06 | 3.25 | 3.34   | 3.38 | 3.52 | 3.40       |
| Tetrazine      | 2 $^1A_g$    |                                               | 4.44 | 4.52 | 4.57   | 4.59 | 4.66 |            |
| Tetrazine      | 1 $^1B_{1g}$ |                                               | 4.09 | 4.40 | 4.53   | 4.58 | 4.74 |            |
| Tetrazine      | 1 $^1B_{2g}$ |                                               | 4.79 | 4.96 | 5.04   | 5.08 | 5.20 |            |
| Tetrazine      | 1 $^1B_{3g}$ |                                               | 5.27 | 5.51 | 5.63   | 5.69 | 5.87 |            |
| Tetrazine      | 2 $^1A_u$    |                                               | 5.09 | 5.25 | 5.33   | 5.37 | 5.50 |            |
| Tetrazine      | 2 $^1B_{2g}$ |                                               | 5.50 | 5.72 | 5.84   | 5.89 | 6.07 | 5.50       |
| Tetrazine      | 2 $^1B_{1g}$ |                                               | 5.83 | 6.06 | 6.19   | 6.26 | 6.46 | 5.90       |
| Tetrazine      | 2 $^1B_{3u}$ |                                               | 6.23 | 6.44 | 6.56   | 6.61 | 6.78 | 6.47       |
| Tetrazine      | 3 $^1B_{1g}$ |                                               | 6.03 | 6.33 | 6.47   | 6.54 | 6.73 |            |
| Tetrazine      | 1 $^3B_{3u}$ |                                               | 1.27 | 1.40 | 1.47   | 1.51 | 1.62 |            |
| Tetrazine      | 1 $^3A_u$    |                                               | 2.81 | 2.99 | 3.09   | 3.14 | 3.29 |            |
| Tetrazine      | 1 $^3B_{1g}$ |                                               | 3.74 | 3.90 | 3.98   | 4.02 | 4.14 |            |
| Tetrazine      | 1 $^3B_{1u}$ |                                               | 4.19 | 4.25 | 4.29   | 4.31 | 4.38 | 1.69       |
| Tetrazine      | 1 $^3B_{2u}$ |                                               | 3.94 | 4.13 | 4.23   | 4.27 | 4.40 | 2.90       |
| Tetrazine      | 1 $^3B_{2g}$ |                                               | 4.50 | 4.68 | 4.77   | 4.81 | 4.95 | 3.60       |
| Tetrazine      | 2 $^3A_u$    |                                               | 4.55 | 4.74 | 4.85   | 4.90 | 5.05 |            |
| Tetrazine      | 1 $^3B_{3g}$ |                                               | 7.28 | 7.41 | 7.48   | 7.51 | 7.62 |            |
| Tetrazine      | 2 $^3B_{1u}$ |                                               | 5.04 | 5.20 | 5.27   | 5.31 | 5.41 |            |

Table S10: ... continued

| TZVP Basis Set |              | CASPT2 with IPEA shift $\varepsilon$ [a.u.] = |      |       |        |         |       | Experiment |
|----------------|--------------|-----------------------------------------------|------|-------|--------|---------|-------|------------|
| Molecule       | State        | -0.12                                         | 0    | 0.08  | 0.1337 | 0.16    | 0.25  |            |
| Tetrazine      | 2 $^3B_{2g}$ |                                               | 5.33 | 5.59  | 5.72   | 5.78    | 5.97  |            |
| Tetrazine      | 2 $^3B_{1g}$ |                                               | 5.76 | 6.00  | 6.13   | 6.19    | 6.38  |            |
| Tetrazine      | 2 $^3B_{3u}$ |                                               | 5.99 | 6.21  | 6.33   | 6.38    | 6.55  |            |
| Tetrazine      | 2 $^3B_{2u}$ |                                               | 5.88 | 6.04  | 6.14   | 6.18    | 6.32  |            |
| Formaldehyde   | 1 $^1A_2$    | 4.08                                          | 4.11 | 4.11  | 4.12   | 4.13    | 4.14  | 4.02       |
| Formaldehyde   | 1 $^1B_1$    | 9.21                                          | 9.25 | 9.25  | 9.27   | 9.27    | 9.29  |            |
| Formaldehyde   | 2 $^1A_1$    | 8.67                                          | 8.93 | 9.07  | 9.15   | 9.19    | 9.32  |            |
| Formaldehyde   | 1 $^3A_2$    | 3.58                                          | 3.65 | 3.68  | 3.70   | 3.71    | 3.74  | 3.50       |
| Formaldehyde   | 1 $^3A_1$    | 5.97                                          | 5.99 | 5.98  | 5.99   | 5.99    | 5.99  | 5.82       |
| Acetone        | 1 $^1A_2$    | 4.25                                          | 4.28 | 4.57  | 4.61   | 4.62    | 4.68  | 4.38       |
| Acetone        | 1 $^1B_1$    | 10.42                                         | 9.10 | 10.56 | 10.59  | 10.61   | 10.65 |            |
| Acetone        | 2 $^1A_1$    | 8.84                                          | 9.05 | 9.08  | 9.15   | 9.19    | 9.29  |            |
| Acetone        | 1 $^3A_2$    | 3.97                                          | 3.91 | 4.21  | 4.25   | 4.27    | 4.34  | 4.16       |
| Acetone        | 1 $^3A_1$    | 6.05                                          | 5.91 | 6.18  | 6.21   | 6.23    | 6.28  | 5.88       |
| Benzoquinone   | 1 $^1B_{1g}$ |                                               | 2.38 | 2.52  | 2.60   | 2.64    | 2.76  | 2.60       |
| Benzoquinone   | 1 $^1A_u$    |                                               | 2.43 | 2.55  | 2.62   | 2.66    | 2.77  | 2.59       |
| Benzoquinone   | 1 $^1B_{3g}$ |                                               | 3.99 | 3.96  | 4.07   | 4.11    | 4.25  | 4.29       |
| Benzoquinone   | 2 $^1A_g$    |                                               | 4.32 | 4.36  | 4.40   | 4.42    | 4.49  |            |
| Benzoquinone   | 1 $^1B_{2g}$ |                                               | 4.38 | 5.17  | 5.37   | 5.44    | 5.64  |            |
| Benzoquinone   | 1 $^1B_{1u}$ |                                               | 4.77 | 4.87  | 4.96   | 5.00    | 5.14  | 5.31       |
| Benzoquinone   | 1 $^1B_{3u}$ |                                               | 4.41 | 5.22  | 5.37   | 5.44    | 5.64  |            |
| Benzoquinone   | 2 $^1B_{2g}$ |                                               | 5.71 | 6.07  | 6.25   | 6.33    | 6.59  |            |
| Benzoquinone   | 2 $^1B_{1g}$ |                                               | 5.52 | 5.76  | 5.89   | 5.95    | 6.13  |            |
| Benzoquinone   | 2 $^1A_u$    |                                               | 4.15 | 5.66  | 4.61*  | -10.33* | 6.03  |            |
| Benzoquinone   | 3 $^1A_g$    |                                               | 5.75 | 5.86  | 5.93   | 5.96    | 6.06  |            |
| Benzoquinone   | 2 $^1B_{3g}$ |                                               | 6.83 | 6.62  | 6.74   | 6.80    | 6.96  |            |
| Benzoquinone   | 1 $^1B_{2u}$ |                                               | 7.02 | 7.01  | 7.11   | 7.16    | 7.32  |            |
| Benzoquinone   | 2 $^1B_{1u}$ |                                               | 7.09 | 6.49  | 6.68   | 6.77    | 7.04  | 7.30       |
| Benzoquinone   | 3 $^1B_{1u}$ |                                               | 7.54 | 7.26  | 7.37   | 7.42    | 7.58  |            |
| Benzoquinone   | 3 $^1B_{1g}$ |                                               | 6.55 | 7.16  | 7.54   | 7.63    | 7.88  |            |
| Benzoquinone   | 3 $^1A_u$    |                                               | 6.77 | 7.39  | 7.56   | 7.63    | 7.89  |            |
| Benzoquinone   | 4 $^1A_g$    |                                               | 7.52 | 7.78  | 7.87   | 7.91    | 8.05  |            |
| Benzoquinone   | 5 $^1A_g$    |                                               | 7.67 | 7.78  | 7.89   | 7.94    | 8.11  |            |
| Benzoquinone   | 1 $^3B_{1g}$ |                                               | 2.88 | 2.36  | 2.45   | 2.49    | 2.62  | 2.30       |
| Benzoquinone   | 1 $^3A_u$    |                                               | 2.28 | 2.42  | 2.50   | 2.54    | 2.66  | 2.34       |
| Benzoquinone   | 1 $^3B_{1u}$ |                                               | 2.20 | 2.83  | 2.89   | 2.91    | 2.98  |            |
| Benzoquinone   | 1 $^3B_{3g}$ |                                               | 2.99 | 3.12  | 3.19   | 3.22    | 3.32  |            |
| Formamide      | 1 $^1A''$    | 5.66                                          | 5.70 | 5.72  | 5.73   | 5.74    | 5.76  | 5.50       |

Table S10: ... continued

| TZVP Basis Set |           | CASPT2 with IPEA shift $\varepsilon$ [a.u.] = |       |         |        |       |       | Experiment |
|----------------|-----------|-----------------------------------------------|-------|---------|--------|-------|-------|------------|
| Molecule       | State     | -0.12                                         | 0     | 0.08    | 0.1337 | 0.16  | 0.25  |            |
| Formamide      | 2 $^1A'$  | 6.69                                          | 7.00  | 7.14    | 7.23   | 7.27  | 7.39  | 7.40       |
| Formamide      | 3 $^1A'$  | 9.91                                          | 10.18 | 10.31   | 10.39  | 10.42 | 10.54 |            |
| Formamide      | 1 $^3A''$ |                                               | 5.42  | 5.46    | 5.48   | 5.49  | 5.52  | 5.30       |
| Formamide      | 1 $^3A'$  | 5.63                                          | 5.69  | 5.74    | 5.76   | 5.77  | 5.81  |            |
| Acetamide      | 1 $^1A''$ |                                               | 5.73  | 5.75    | 5.77   | 5.78  | 5.81  | 5.44       |
| Acetamide      | 2 $^1A'$  |                                               | 6.87  | 7.01    | 7.10   | 7.14  | 7.27  | 7.40       |
| Acetamide      | 3 $^1A'$  |                                               | 9.67  | 9.82    | 9.91   | 9.95  | 10.09 | 9.90       |
| Acetamide      | 1 $^3A''$ |                                               | 5.38  | 5.44    | 5.47   | 5.49  | 5.54  |            |
| Acetamide      | 1 $^3A'$  |                                               | 5.58  | 5.64    | 5.68   | 5.70  | 5.76  |            |
| Propanamide    | 1 $^1A''$ |                                               | 5.75  | 5.78    | 5.80   | 5.81  | 5.84  | 5.44       |
| Propanamide    | 2 $^1A'$  |                                               | 6.79  | 6.94    | 7.03   | 7.07  | 7.20  | 7.40       |
| Propanamide    | 3 $^1A'$  |                                               | 9.48  | 9.65    | 9.75   | 9.79  | 9.94  | 9.90       |
| Propanamide    | 1 $^3A''$ |                                               | 5.41  | 5.45    | 5.49   | 5.51  | 5.56  |            |
| Propanamide    | 1 $^3A'$  |                                               | 5.73  | 5.77    | 5.80   | 5.81  | 5.86  |            |
| Cytosine       | 2 $^1A'$  |                                               | 4.35  | 4.47    | 4.54   | 4.57  | 4.67  | 4.60       |
| Cytosine       | 1 $^1A''$ |                                               | 5.04  | 5.16    | 5.23   | 5.26  | 5.37  | 5.15       |
| Cytosine       | 3 $^1A'$  |                                               | 5.03  | 5.23    | 5.33   | 5.38  | 5.53  | 5.60       |
| Cytosine       | 4 $^1A'$  |                                               | 5.70  | 5.99    | 6.13   | 6.20  | 6.40  | 6.23       |
| Cytosine       | 2 $^1A''$ |                                               | 5.46  | 5.58    | 5.65   | 5.68  | 5.78  |            |
| Cytosine       | 5 $^1A'$  |                                               | 6.38  | 6.62    | 6.74   | 6.80  | 6.97  | 6.90       |
| Cytosine       | 6 $^1A'$  |                                               | 7.56  | 7.84    | 7.97   | 8.03  | 8.22  |            |
| Thymine        | 1 $^1A''$ |                                               | 4.91* | 5.06    | 5.11   | 5.13  | 5.21  | 5.05       |
| Thymine        | 2 $^1A'$  |                                               | 4.64  | 4.83    | 4.89   | 4.93  | 5.06  | 4.88       |
| Thymine        | 3 $^1A'$  |                                               | 5.63  | 5.92    | 5.94   | 6.00  | 6.15  | 5.95       |
| Thymine        | 2 $^1A''$ |                                               | 5.79* | 6.47    | 6.53   | 6.55  | 6.64  |            |
| Thymine        | 4 $^1A'$  |                                               | 5.97  | 6.25    | 6.29   | 6.35  | 6.53  | 6.20       |
| Thymine        | 3 $^1A''$ |                                               | 6.54* | 6.80    | 6.93   | 6.97  | 7.11  |            |
| Thymine        | 5 $^1A'$  |                                               | 6.80  | 7.08    | 7.18   | 7.24  | 7.43  | 7.05       |
| Thymine        | 6 $^1A'$  |                                               | 7.81  | -18.04* | 7.89   | 8.15  | 8.48  |            |
| Uracil         | 1 $^1A''$ |                                               | 4.95  | 5.04    | 5.07*  | 5.11* | 5.18  | 4.83       |
| Uracil         | 2 $^1A'$  |                                               | 4.81  | 4.97    | 5.06   | 5.10  | 5.23  | 5.10       |
| Uracil         | 3 $^1A'$  |                                               | 5.71  | 5.88    | 5.97   | 6.02  | 6.15  | 6.00       |
| Uracil         | 2 $^1A''$ |                                               | 6.19  | 6.36    | 5.93*  | 6.45* | 6.54  |            |
| Uracil         | 3 $^1A''$ |                                               | 6.69  | 7.02    | 6.54*  | 7.14* | 7.25  |            |
| Uracil         | 4 $^1A'$  |                                               | 6.18  | 6.41    | 6.52   | 6.58  | 6.74  | 6.60       |
| Uracil         | 4 $^1A''$ |                                               | 7.07  | 7.25    | 6.99*  | 7.39  | 7.55  |            |
| Uracil         | 5 $^1A'$  |                                               | 6.80  | 7.05    | 7.18   | 7.24  | 7.42  | 6.95       |
| Adenine        | 2 $^1A'$  |                                               | 4.72  | 4.91    | 5.01   | 5.06  | 5.20  | 4.63       |

Table S10: ... continued

| TZVP Basis Set |           | CASPT2 with IPEA shift $\varepsilon$ [a.u.] = |      |      |        |      |      | Experiment |
|----------------|-----------|-----------------------------------------------|------|------|--------|------|------|------------|
| Molecule       | State     | -0.12                                         | 0    | 0.08 | 0.1337 | 0.16 | 0.25 |            |
| Adenine        | 3 $^1A'$  |                                               | 4.81 | 5.01 | 5.11   | 5.15 | 5.29 | 4.92       |
| Adenine        | 1 $^1A''$ |                                               | 5.00 | 5.15 | 5.16   | 5.22 | 5.34 | 5.40       |
| Adenine        | 4 $^1A'$  |                                               | 5.62 | 5.92 | 6.07   | 6.14 | 6.34 | 5.99       |
| Adenine        | 5 $^1A'$  |                                               | 5.87 | 6.24 | 6.39   | 6.45 | 6.64 | 5.33       |
| Adenine        | 2 $^1A''$ |                                               | 5.83 | 5.92 | 5.98   | 6.01 | 6.10 |            |
| Adenine        | 6 $^1A'$  |                                               | 6.15 | 6.47 | 6.61   | 6.67 | 6.87 | 6.81       |
| Adenine        | 7 $^1A'$  |                                               | 6.84 | 7.14 | 7.28   | 7.35 | 7.56 | 7.75       |

Let us now comment on a few states for which we had identified intruder state problems. In some cases, the intruder states were straightforward, since the states possessed low reference weights and appeared at suspiciously low energies. This was the case, e.g., of the 3  $1B_u$  state of octatetraene or the 6  $^1A'$  state of thymine for  $\varepsilon = 0.08$  a.u. In other states, this assignment was not that clear, for example if they were only coupled to a state clearly experiencing intruder state problems in the multi-state CASPT2 treatment. To what extent this coupling corrupted the energies of these states cannot be easily estimated. We have already discussed in section S3.4.1 that the IPEA shift should not be employed as a substitute for the level shift for removing the coupling to intruder states. However, its effect can be the same: variation of the IPEA shift value changes the energy denominators in the first-order wave function and second-order energy contributions and can, thus, decrease the coupling to intruder states. When this coupling is sufficiently damped, a further increase of the IPEA shift should further increase the energy of the state with the size of the increase related to the open-shell character of the state. This is naturally also the behavior for states that do not experience any intruder state problems. Keeping this in mind, we can find a number of states that we have ascribed intruder state problems to (see sections S3.4.2 and S3.4.3) whose excitation energies converge with increasing IPEA shift value to the excitation energy with  $\varepsilon = 0.25$  a.u. where there is no intruder state problem present, e.g., the  $^1A'$  states of imidazole or the  $1^1B_{1g}$  state of pyrazine. These states did not suffer from intruder state problems at the SS-CASPT2 level but rather were mixed with affected states at the MS-CASPT2 level. We chose to exclude them from our data set with the concern that these energies might be corrupted by the coupling to the affected states. However, the normally appearing trend of increasing energy with increasing IPEA shift value

–without any spike as, e.g., seen for the  $1^1B_2$  state of furan –might raise the question if we had been overly cautious in excluding these states from our statistical analysis. Unfortunately, we see no way of clarifying this question and, thus, decide to rather stay on the safe side.

In Table S11 we show the NOS and the approximate dynamical correlation energy  $\tilde{E}^{\text{dyn}}$  for the states in the Thiel benchmark set. We only show the NOS value computed using the IPEA shift value of  $\varepsilon = 0.25$  a.u. The NOS values obtained using the other shift values are practically identical and, thus, not reported. The approximate dynamical correlation energy is given by the difference  $\tilde{E}^{\text{dyn}} = E_{\text{CASSCF}} - E_{\text{CASPT2}}$ .

Table S11: Number of open shells (NOS) and approximate dynamical correlation energy  $\tilde{E}^{\text{dyn}}$  in eV for the electronic states in Thiel’s benchmark set.

| TZVP Basis Set | Molecule    | State | NOS   | CASPT2 with IPEA shift $\varepsilon$ [a.u.] = |       |       |        |       |
|----------------|-------------|-------|-------|-----------------------------------------------|-------|-------|--------|-------|
|                |             |       |       | –0.12                                         | 0     | 0.08  | 0.1337 | 0.16  |
| Ethene         | $1^1A_g$    | 0.00  | 7.25  | 7.21                                          | 7.17  | 7.17  | 7.19   | 7.14  |
| Ethene         | $1^1B_{1u}$ | 2.00  | 8.46  | 8.31                                          | 8.13  | 8.16  | 8.22   | 8.04  |
| Ethene         | $1^3B_{1u}$ | 2.00  | 7.19  | 7.10                                          | 7.00  | 7.01  | 7.05   | 6.94  |
| Butadiene      | $1^1A_g$    | 0.21  | 14.47 | 14.45                                         | 14.42 | 14.41 | 14.40  | 14.38 |
| Butadiene      | $1^1B_u$    | 1.84  |       | 16.37                                         | 16.21 | 16.12 | 16.07  | 15.93 |
| Butadiene      | $2^1A_g$    | 1.37  | 14.85 | 14.58                                         | 14.44 | 14.36 | 14.32  | 14.20 |
| Butadiene      | $1^3B_u$    | 2.00  |       | 14.17                                         | 14.07 | 14.01 | 13.99  | 13.90 |
| Butadiene      | $1^3A_g$    | 2.00  | 14.32 | 14.15                                         | 14.04 | 13.97 | 13.94  | 13.83 |
| Hexatriene     | $1^1A_g$    | 0.37  |       | 20.92                                         | 20.87 | 20.85 | 20.84  | 20.81 |
| Hexatriene     | $1^1B_u$    | 2.01  |       | 23.33                                         | 23.14 | 23.03 | 22.99  | 22.83 |
| Hexatriene     | $2^1A_g$    | 1.38  |       | 21.33                                         | 21.17 | 21.08 | 21.04  | 20.91 |
| Hexatriene     | $1^3B_u$    | 2.09  |       | 21.05                                         | 20.91 | 20.85 | 20.82  | 20.72 |
| Hexatriene     | $1^3A_g$    | 2.05  |       | 21.06                                         | 20.90 | 20.82 | 20.78  | 20.66 |
| Octatetraene   | $1^1A_g$    | 0.50  |       | 27.68                                         | 27.61 | 27.59 | 27.57  | 27.53 |
| Octatetraene   | $2^1A_g$    | 1.46  |       | 28.03                                         | 27.85 | 27.76 | 27.71  | 27.57 |
| Octatetraene   | $1^1B_u$    | 2.04  |       | 30.03                                         | 29.82 | 29.71 | 29.66  | 29.50 |
| Octatetraene   | $2^1B_u$    | 2.19  |       | 28.23                                         | 27.98 | 27.87 | 27.81  | 27.63 |
| Octatetraene   | $3^1A_g$    | 2.23  |       | 28.86                                         | 28.43 | 28.25 | 28.17  | 27.91 |
| Octatetraene   | $4^1A_g$    | 1.87  |       | 28.22                                         | 27.91 | 27.77 | 27.70  | 27.49 |
| Octatetraene   | $3^1B_u$    | 2.43  |       | 28.62                                         |       | 28.46 | 28.09  | 27.68 |
| Octatetraene   | $1^3B_u$    | 2.09  |       | 27.77                                         | 27.60 | 27.53 | 27.49  | 27.38 |
| Octatetraene   | $1^3A_g$    | 2.05  |       | 27.79                                         | 27.60 | 27.51 | 27.47  | 27.33 |
| Cyclopropene   | $1^1A_1$    | 0.00  | 10.81 | 10.77                                         | 10.74 | 10.73 | 10.72  | 10.69 |
| Cyclopropene   | $1^1B_1$    | 2.00  | 11.66 | 11.51                                         | 11.41 | 11.35 | 11.32  | 11.23 |
| Cyclopropene   | $1^1B_2$    | 2.00  | 12.84 | 12.62                                         | 12.49 | 12.41 | 12.37  | 12.25 |
| Cyclopropene   | $1^3B_2$    | 2.00  | 10.86 | 10.74                                         | 10.67 | 10.63 | 10.61  | 10.55 |

Table S11: ... continued

| TZVP Basis Set  |              |      | CASPT2 with IPEA shift $\epsilon$ [a.u.] = |       |       |        |       |       |
|-----------------|--------------|------|--------------------------------------------|-------|-------|--------|-------|-------|
| Molecule        | State        | NOS  | -0.12                                      | 0     | 0.08  | 0.1337 | 0.16  | 0.25  |
| Cyclopropene    | 1 $^3B_1$    | 2.00 | 11.50                                      | 11.32 | 11.22 | 11.15  | 11.12 | 11.02 |
| Cyclopentadiene | 1 $^1A_1$    | 0.11 |                                            | 18.24 | 18.18 | 18.16  | 18.14 | 18.11 |
| Cyclopentadiene | 1 $^1B_2$    | 2.00 |                                            | 20.06 | 19.90 | 19.81  | 19.76 | 19.62 |
| Cyclopentadiene | 2 $^1A_1$    | 1.51 |                                            | 18.89 | 18.65 | 18.52  | 18.46 | 18.28 |
| Cyclopentadiene | 3 $^1A_1$    | 1.92 |                                            | 21.17 | 20.85 | 20.67  | 20.58 | 20.32 |
| Cyclopentadiene | 1 $^3B_2$    | 2.00 |                                            | 17.78 | 17.67 | 17.60  | 17.57 | 17.47 |
| Cyclopentadiene | 1 $^3A_1$    | 2.00 |                                            | 17.77 | 17.64 | 17.57  | 17.53 | 17.42 |
| Norbornadiene   | 1 $^1A_1$    | 0.09 |                                            | 26.23 | 26.14 | 26.11  | 26.09 | 26.04 |
| Norbornadiene   | 1 $^1A_2$    | 2.00 |                                            | 28.20 | 28.03 | 27.92  | 27.87 | 27.70 |
| Norbornadiene   | 1 $^1B_2$    | 2.00 |                                            | 29.07 | 28.85 | 28.72  | 28.66 | 28.45 |
| Norbornadiene   | 2 $^1B_2$    | 2.00 |                                            | 29.01 | 28.75 | 28.60  | 28.53 | 28.32 |
| Norbornadiene   | 2 $^1A_2$    | 2.00 |                                            | 28.74 | 28.54 | 28.42  | 28.36 | 28.18 |
| Norbornadiene   | 2 $^1A_1$    | 0.65 |                                            | 26.14 | 25.89 | 25.79  | 25.76 | 25.60 |
| Norbornadiene   | 1 $^3A_2$    | 2.00 |                                            | 25.88 | 25.73 | 25.65  | 25.61 | 25.48 |
| Norbornadiene   | 1 $^3B_2$    | 2.00 |                                            | 25.80 | 25.66 | 25.57  | 25.53 | 25.39 |
| Benzene         | 1 $^1A'$     | 0.22 |                                            | 20.60 | 20.55 | 20.53  | 20.52 | 20.49 |
| Benzene         | 2 $^1A'$     | 2.17 |                                            | 20.68 | 20.53 | 20.44  | 20.40 | 20.26 |
| Benzene         | 3 $^1A'$     | 2.04 |                                            | 22.56 | 22.34 | 22.22  | 22.16 | 21.97 |
| Benzene         | 4 $^1A'$     | 2.04 |                                            | 23.44 | 23.13 | 22.96  | 22.88 | 22.63 |
| Benzene         | 5 $^1A'$     | 2.07 |                                            | 23.44 | 23.13 | 22.96  | 22.88 | 22.62 |
| Benzene         | 6 $^1A'$     | 2.14 |                                            | 21.11 | 20.67 | 20.56  | 20.50 | 20.33 |
| Benzene         | 7 $^1A'$     | 1.71 |                                            | 21.07 | 20.67 | 20.54  | 20.49 | 20.31 |
| Benzene         | 1 $^3A'$     | 2.08 |                                            | 20.37 | 20.23 | 20.15  | 20.12 | 20.00 |
| Benzene         | 2 $^3A'$     | 2.25 |                                            | 20.90 | 20.69 | 20.59  | 20.54 | 20.40 |
| Benzene         | 3 $^3A'$     | 2.21 |                                            | 20.90 | 20.69 | 20.58  | 20.54 | 20.39 |
| Benzene         | 4 $^3A'$     | 2.00 |                                            | 22.61 | 22.38 | 22.25  | 22.19 | 22.00 |
| Naphthalene     | 1 $^1A_g$    | 0.38 |                                            | 33.53 | 33.44 | 33.41  | 33.39 | 33.33 |
| Naphthalene     | 1 $^1B_{3u}$ | 2.27 |                                            | 33.76 | 33.55 | 33.44  | 33.39 | 33.23 |
| Naphthalene     | 1 $^1B_{2u}$ | 2.11 |                                            | 35.58 | 35.37 | 35.25  | 35.20 | 35.02 |
| Naphthalene     | 2 $^1A_g$    | 2.11 |                                            | 33.94 | 33.65 | 33.51  | 33.44 | 33.23 |
| Naphthalene     | 1 $^1B_{1g}$ | 2.16 |                                            | 34.49 | 34.15 | 34.00  | 33.94 | 33.73 |
| Naphthalene     | 2 $^1B_{3u}$ | 2.14 |                                            | 36.21 | 35.86 | 35.68  | 35.73 | 35.35 |
| Naphthalene     | 2 $^1B_{1g}$ | 2.12 |                                            | 35.98 | 35.70 | 35.55  | 35.48 | 35.26 |
| Naphthalene     | 2 $^1B_{2u}$ | 2.08 |                                            | 35.68 | 35.46 | 35.31  | 35.25 | 35.05 |
| Naphthalene     | 3 $^1A_g$    | 2.27 |                                            | 34.25 | 33.90 | 33.74  | 33.67 | 33.44 |
| Naphthalene     | 3 $^1B_{2u}$ | 2.32 |                                            | 36.26 | 37.52 | 35.97  | 35.65 | 35.39 |
| Naphthalene     | 3 $^1B_{3u}$ | 2.13 |                                            | 34.11 | 33.79 | 33.64  | 35.14 | 33.35 |
| Naphthalene     | 1 $^3B_{2u}$ | 2.11 |                                            | 33.62 | 33.38 | 33.28  | 33.23 | 33.09 |

Table S11: ... continued

| TZVP Basis Set |              |      | CASPT2 with IPEA shift $\epsilon$ [a.u.] = |       |       |        |       |      |
|----------------|--------------|------|--------------------------------------------|-------|-------|--------|-------|------|
| Molecule       | State        | NOS  | -0.12                                      | 0     | 0.08  | 0.1337 | 0.16  | 0.25 |
| Naphthalene    | 1 $^3B_{3u}$ | 2.19 | 33.90                                      | 33.64 | 33.52 | 33.47  | 33.30 |      |
| Naphthalene    | 1 $^3B_{1g}$ | 2.08 | 33.70                                      | 33.48 | 33.37 | 33.33  | 33.17 |      |
| Naphthalene    | 2 $^3B_{2u}$ | 2.29 | 33.68                                      | 33.48 | 33.38 | 33.33  | 33.18 |      |
| Naphthalene    | 2 $^3B_{3u}$ | 2.04 | 35.30                                      | 35.06 | 34.92 | 34.86  | 34.65 |      |
| Naphthalene    | 1 $^3A_g$    | 2.14 | 33.94                                      | 33.67 | 33.54 | 33.49  | 33.30 |      |
| Naphthalene    | 2 $^3B_{1g}$ | 2.13 | 35.85                                      | 35.55 | 35.39 | 35.32  | 35.09 |      |
| Naphthalene    | 2 $^3A_g$    | 2.65 | 34.02                                      | 33.71 | 33.55 | 33.48  | 33.26 |      |
| Naphthalene    | 3 $^3A_g$    | 2.20 | 35.57                                      | 35.27 | 35.12 | 35.04  | 34.82 |      |
| Naphthalene    | 3 $^3B_{1g}$ | 2.23 | 33.95                                      | 33.65 | 33.51 | 33.45  | 33.24 |      |
| Furan          | 1 $^1A_1$    | 0.10 | 19.45                                      | 19.39 | 19.37 | 19.36  | 19.33 |      |
| Furan          | 1 $^1B_2$    | 2.02 | 21.40                                      | 21.18 | 21.12 | 18.21  | 20.83 |      |
| Furan          | 2 $^1A_1$    | 2.10 | 19.97                                      | 19.76 | 19.65 | 19.59  | 19.42 |      |
| Furan          | 3 $^1A_1$    | 1.93 | 22.39                                      | 21.91 | 21.68 | 21.58  | 21.27 |      |
| Furan          | 1 $^3B_2$    | 2.00 | 18.89                                      | 18.78 | 18.72 | 18.70  | 18.60 |      |
| Furan          | 1 $^3A_1$    | 2.01 | 19.19                                      | 19.04 | 18.96 | 18.92  | 18.79 |      |
| Pyrrole        | 1 $^1A_1$    | 0.10 | 18.84                                      | 18.80 | 18.78 | 18.77  | 18.74 |      |
| Pyrrole        | 2 $^1A_1$    | 2.14 | 19.40                                      | 19.20 | 19.09 | 19.04  | 18.88 |      |
| Pyrrole        | 1 $^1B_2$    | 2.04 | 20.73                                      | 20.42 | 20.28 | 20.21  | 20.18 |      |
| Pyrrole        | 3 $^1A_1$    | 1.54 | 20.92                                      | 20.58 | 20.41 | 20.33  | 20.09 |      |
| Pyrrole        | 1 $^3B_2$    | 2.00 | 18.49                                      | 18.39 | 18.32 | 18.30  | 18.20 |      |
| Pyrrole        | 1 $^3A_1$    | 2.01 | 18.95                                      | 18.78 | 18.69 | 18.65  | 18.51 |      |
| Imidazole      | 1 $^1A'$     | 0.07 | 19.55                                      | 19.51 | 19.50 | 19.49  | 19.47 |      |
| Imidazole      | 1 $^1A''$    | 2.04 | 19.63                                      | 19.51 | 19.45 | 19.42  | 19.32 |      |
| Imidazole      | 2 $^1A'$     | 2.06 | 20.85                                      | 20.56 | 20.40 | 20.34  | 20.13 |      |
| Imidazole      | 3 $^1A'$     | 2.00 | 21.11                                      | 20.92 | 20.81 | 20.75  | 20.59 |      |
| Imidazole      | 2 $^1A''$    | 2.08 | 19.94                                      | 19.82 | 19.74 | 19.71  | 19.60 |      |
| Imidazole      | 4 $^1A'$     | 1.88 | 22.06                                      | 21.61 | 21.42 | 21.33  | 21.06 |      |
| Imidazole      | 1 $^3A'$     | 2.01 | 19.59                                      | 19.45 | 19.38 | 19.35  | 19.24 |      |
| Imidazole      | 2 $^3A'$     | 2.16 | 19.76                                      | 19.59 | 19.50 | 19.45  | 19.32 |      |
| Imidazole      | 1 $^3A''$    | 2.01 | 19.57                                      | 19.45 | 19.39 | 19.35  | 19.25 |      |
| Imidazole      | 3 $^3A'$     | 2.03 | 20.50                                      | 20.27 | 20.16 | 20.11  | 19.95 |      |
| Imidazole      | 4 $^3A'$     | 2.04 | 20.10                                      | 19.96 | 19.88 | 19.84  | 19.71 |      |
| Imidazole      | 2 $^3A''$    | 2.14 | 19.92                                      | 19.78 | 19.70 | 19.67  | 19.55 |      |
| Pyridine       | 1 $^1A_1$    | 0.22 | 21.27                                      | 21.22 | 21.20 | 21.19  | 21.15 |      |
| Pyridine       | 1 $^1B_2$    | 2.17 | 20.71                                      | 20.58 | 20.51 | 20.48  | 20.38 |      |
| Pyridine       | 2 $^1A_1$    | 2.05 | 23.61                                      | 23.21 | 23.03 | 22.95  | 22.71 |      |
| Pyridine       | 3 $^1A_1$    | 2.10 | 22.94                                      | 22.62 | 22.44 | 22.36  | 22.10 |      |
| Pyridine       | 2 $^1B_2$    | 2.05 | 22.65                                      | 22.43 | 22.32 | 22.27  | 22.11 |      |

Table S11: ... continued

| TZVP Basis Set |              |      | CASPT2 with IPEA shift $\epsilon$ [a.u.] = |       |       |        |       |       |
|----------------|--------------|------|--------------------------------------------|-------|-------|--------|-------|-------|
| Molecule       | State        | NOS  | -0.12                                      | 0     | 0.08  | 0.1337 | 0.16  | 0.25  |
| Pyridine       | 4 $^1A_1$    | 1.63 |                                            | 22.48 | 22.34 | 22.24  | 22.20 | 22.05 |
| Pyridine       | 3 $^1B_2$    | 2.13 |                                            | 20.29 | 20.18 | 20.11  | 20.08 | 19.98 |
| Pyridine       | 1 $^1B_1$    | 2.17 |                                            | 21.25 | 21.12 | 21.05  | 21.02 | 20.92 |
| Pyridine       | 1 $^1A_2$    | 2.09 |                                            | 21.68 | 21.54 | 21.46  | 21.43 | 21.32 |
| Pyridine       | 1 $^3A_1$    | 2.12 |                                            | 20.97 | 20.81 | 20.73  | 20.69 | 20.57 |
| Pyridine       | 1 $^3B_2$    | 2.14 |                                            | 21.86 | 21.60 | 21.48  | 21.42 | 21.26 |
| Pyridine       | 2 $^3A_1$    | 2.23 |                                            | 21.51 | 21.29 | 21.19  | 21.14 | 20.99 |
| Pyridine       | 2 $^3B_2$    | 2.08 |                                            | 23.59 | 23.17 | 23.02  | 22.96 | 22.75 |
| Pyridine       | 3 $^3A_1$    | 2.60 |                                            | 21.37 | 21.04 | 20.87  | 20.81 | 20.63 |
| Pyridine       | 3 $^3B_2$    | 2.13 |                                            | 20.75 | 20.61 | 20.52  | 20.48 | 20.34 |
| Pyridine       | 1 $^3B_1$    | 2.12 |                                            | 21.29 | 21.16 | 21.08  | 21.05 | 20.94 |
| Pyridine       | 1 $^3A_2$    | 2.08 |                                            | 21.70 | 21.54 | 21.46  | 21.42 | 21.30 |
| Pyrazine       | 1 $^1A_g$    | 0.27 |                                            | 21.70 | 21.64 | 21.61  | 21.60 | 21.56 |
| Pyrazine       | 1 $^1B_{2u}$ | 2.20 |                                            | 22.18 | 21.97 | 21.86  | 21.81 | 21.65 |
| Pyrazine       | 1 $^1B_{1u}$ | 2.08 |                                            | 23.69 | 23.49 | 23.37  | 23.32 | 23.14 |
| Pyrazine       | 2 $^1B_{1u}$ | 2.05 |                                            | 24.83 | 24.54 | 24.38  | 24.31 | 24.07 |
| Pyrazine       | 2 $^1B_{2u}$ | 2.12 |                                            | 24.57 | 24.28 | 24.12  | 24.05 | 23.81 |
| Pyrazine       | 1 $^1B_{3g}$ | 2.13 |                                            | 21.81 | 21.58 | 21.47  | 21.41 | 21.30 |
| Pyrazine       | 2 $^1A_g$    | 1.65 |                                            | 21.92 | 21.65 | 21.52  | 21.46 | 21.27 |
| Pyrazine       | 1 $^1B_{3u}$ | 2.13 |                                            | 22.61 | 22.43 | 22.34  | 22.30 | 22.16 |
| Pyrazine       | 1 $^1A_u$    | 2.20 |                                            | 23.63 | 23.37 | 23.24  | 23.18 | 22.99 |
| Pyrazine       | 1 $^1B_{2g}$ | 2.16 |                                            | 22.00 | 21.83 | 21.74  | 21.70 | 21.57 |
| Pyrazine       | 1 $^1B_{1g}$ | 2.31 |                                            | 23.19 | 22.86 | 22.74  | 22.68 | 22.47 |
| Pyrimidine     | 1 $^1A_1$    | 0.21 |                                            | 21.89 | 21.83 | 21.81  | 21.80 | 21.76 |
| Pyrimidine     | 1 $^1B_2$    | 2.17 |                                            | 22.09 | 21.82 | 21.72  | 21.68 | 21.53 |
| Pyrimidine     | 2 $^1A_1$    | 2.08 |                                            | 23.90 | 23.59 | 23.46  | 23.40 | 23.22 |
| Pyrimidine     | 3 $^1A_1$    | 2.04 |                                            | 25.17 | 24.87 | 24.70  | 24.63 | 24.39 |
| Pyrimidine     | 2 $^1B_2$    | 2.07 |                                            | 25.69 | 24.55 | 24.39  | 24.31 | 24.07 |
| Pyrimidine     | 3 $^1B_2$    | 2.15 |                                            | 22.01 | 21.77 | 21.66  | 21.61 | 21.45 |
| Pyrimidine     | 4 $^1A_1$    | 1.71 |                                            | 21.71 | 21.53 | 21.42  | 21.37 | 21.22 |
| Pyrimidine     | 1 $^1B_1$    | 2.19 |                                            | 22.34 | 22.18 | 22.10  | 22.06 | 21.93 |
| Pyrimidine     | 1 $^1A_2$    | 2.21 |                                            | 22.68 | 22.51 | 22.42  | 22.38 | 22.24 |
| Pyridazine     | 1 $^1A_1$    | 0.24 |                                            | 21.85 | 21.79 | 21.76  | 21.75 | 21.71 |
| Pyridazine     | 2 $^1A_1$    | 2.21 |                                            | 21.96 | 21.78 | 21.68  | 21.63 | 21.49 |
| Pyridazine     | 1 $^1B_2$    | 2.04 |                                            | 23.97 | 23.63 | 23.47  | 23.40 | 23.18 |
| Pyridazine     | 2 $^1B_2$    | 2.07 |                                            | 24.79 | 24.43 | 24.25  | 24.16 | 23.90 |
| Pyridazine     | 3 $^1A_1$    | 1.90 |                                            | 25.00 | 24.64 | 24.45  | 24.36 | 24.09 |
| Pyridazine     | 1 $^1B_1$    | 2.13 |                                            | 22.76 | 22.58 | 22.49  | 22.44 | 22.31 |

Table S11: ... continued

| TZVP Basis Set |              |      | CASPT2 with IPEA shift $\epsilon$ [a.u.] = |       |       |        |       |       |
|----------------|--------------|------|--------------------------------------------|-------|-------|--------|-------|-------|
| Molecule       | State        | NOS  | -0.12                                      | 0     | 0.08  | 0.1337 | 0.16  | 0.25  |
| Pyridazine     | 1 $^1A_2$    | 2.26 |                                            | 22.83 | 22.60 | 22.49  | 22.44 | 22.28 |
| Pyridazine     | 2 $^1A_2$    | 2.12 |                                            | 22.59 | 22.38 | 22.27  | 22.22 | 22.06 |
| Pyridazine     | 2 $^1B_1$    | 2.32 |                                            | 22.81 | 22.58 | 22.45  | 22.40 | 22.22 |
| Triazine       | 1 $^1A'$     | 0.21 |                                            | 22.66 | 22.59 | 22.56  | 22.55 | 22.51 |
| Triazine       | 2 $^1A'$     | 2.17 |                                            | 22.45 | 22.28 | 22.19  | 22.15 | 22.01 |
| Triazine       | 3 $^1A'$     | 2.11 |                                            | 24.99 | 24.45 | 24.31  | 24.25 | 24.05 |
| Triazine       | 4 $^1A'$     | 2.02 |                                            | 26.37 | 26.10 | 25.88  | 25.79 | 25.49 |
| Triazine       | 5 $^1A'$     | 2.20 |                                            | 23.33 | 22.69 | 22.50  | 22.42 | 22.20 |
| Triazine       | 1 $^1A''$    | 2.23 |                                            | 24.32 | 24.03 | 23.88  | 23.82 | 23.61 |
| Triazine       | 2 $^1A''$    | 2.27 |                                            | 23.32 | 23.11 | 22.99  | 22.93 | 22.74 |
| Triazine       | 3 $^1A''$    | 2.21 |                                            | 23.68 | 23.49 | 23.36  | 23.30 | 23.10 |
| Triazine       | 4 $^1A''$    | 2.21 |                                            | 23.65 | 23.47 | 23.34  | 23.28 | 23.09 |
| Tetrazine      | 1 $^1A_g$    | 0.32 |                                            | 23.13 | 23.06 | 23.02  | 23.01 | 22.96 |
| Tetrazine      | 1 $^1B_{2u}$ | 2.18 |                                            | 23.41 | 23.19 | 23.07  | 23.02 | 22.85 |
| Tetrazine      | 1 $^1B_{1u}$ | 2.05 |                                            | 26.87 | 26.55 | 26.39  | 26.31 | 26.07 |
| Tetrazine      | 2 $^1B_{1u}$ | 2.11 |                                            | 25.44 | 25.17 | 25.03  | 24.96 | 24.74 |
| Tetrazine      | 2 $^1B_{2u}$ | 2.12 |                                            | 24.41 | 24.06 | 23.89  | 23.81 | 23.57 |
| Tetrazine      | 2 $^1B_{3g}$ | 2.17 |                                            | 25.50 | 25.10 | 24.89  | 24.79 | 24.49 |
| Tetrazine      | 3 $^1A_g$    | 1.16 |                                            | 25.38 | 24.84 | 24.58  | 24.48 | 24.15 |
| Tetrazine      | 1 $^1B_{3u}$ | 2.22 |                                            | 24.30 | 24.10 | 24.00  | 23.96 | 23.81 |
| Tetrazine      | 1 $^1A_u$    | 2.31 |                                            | 24.63 | 24.37 | 24.24  | 24.19 | 24.00 |
| Tetrazine      | 2 $^1A_g$    | 0.64 |                                            | 24.34 | 24.19 | 24.11  | 24.07 | 23.96 |
| Tetrazine      | 1 $^1B_{1g}$ | 2.23 |                                            | 24.33 | 23.94 | 23.78  | 23.71 | 23.50 |
| Tetrazine      | 1 $^1B_{2g}$ | 2.29 |                                            | 23.47 | 23.23 | 23.11  | 23.06 | 22.89 |
| Tetrazine      | 1 $^1B_{3g}$ | 2.28 |                                            | 24.57 | 24.25 | 24.10  | 24.02 | 23.79 |
| Tetrazine      | 2 $^1A_u$    | 2.33 |                                            | 24.14 | 23.91 | 23.79  | 23.73 | 23.56 |
| Tetrazine      | 2 $^1B_{2g}$ | 2.79 |                                            | 24.30 | 24.01 | 23.86  | 23.78 | 23.56 |
| Tetrazine      | 2 $^1B_{1g}$ | 2.32 |                                            | 24.27 | 23.96 | 23.79  | 23.72 | 23.47 |
| Tetrazine      | 2 $^1B_{3u}$ | 2.55 |                                            | 24.47 | 24.18 | 24.03  | 23.96 | 23.74 |
| Tetrazine      | 3 $^1B_{1g}$ | 2.51 |                                            | 24.52 | 24.15 | 23.97  | 23.89 | 23.65 |
| Tetrazine      | 1 $^3B_{3u}$ | 2.20 |                                            | 24.36 | 24.16 | 24.05  | 24.00 | 23.85 |
| Tetrazine      | 1 $^3A_u$    | 2.26 |                                            | 24.51 | 24.25 | 24.11  | 24.05 | 23.85 |
| Tetrazine      | 1 $^3B_{1g}$ | 2.22 |                                            | 23.85 | 23.62 | 23.50  | 23.45 | 23.28 |
| Tetrazine      | 1 $^3B_{1u}$ | 2.14 |                                            | 22.41 | 22.27 | 22.19  | 22.16 | 22.05 |
| Tetrazine      | 1 $^3B_{2u}$ | 2.13 |                                            | 23.78 | 23.51 | 23.38  | 23.33 | 23.15 |
| Tetrazine      | 1 $^3B_{2g}$ | 2.25 |                                            | 23.45 | 23.19 | 23.07  | 23.01 | 22.83 |
| Tetrazine      | 2 $^3A_u$    | 2.28 |                                            | 24.40 | 24.14 | 24.00  | 23.94 | 23.74 |
| Tetrazine      | 1 $^3B_{3g}$ | 2.15 |                                            | 22.57 | 22.37 | 22.26  | 22.22 | 22.06 |

Table S11: ... continued

| TZVP Basis Set |             |      | CASPT2 with IPEA shift $\epsilon$ [a.u.] = |       |       |        |       |       |
|----------------|-------------|------|--------------------------------------------|-------|-------|--------|-------|-------|
| Molecule       | State       | NOS  | -0.12                                      | 0     | 0.08  | 0.1337 | 0.16  | 0.25  |
| Tetrazine      | $2^3B_{1u}$ | 2.31 |                                            | 23.15 | 22.92 | 22.81  | 22.76 | 22.61 |
| Tetrazine      | $2^3B_{2g}$ | 2.75 |                                            | 24.31 | 23.97 | 23.80  | 23.73 | 23.49 |
| Tetrazine      | $2^3B_{1g}$ | 2.46 |                                            | 24.12 | 23.81 | 23.65  | 23.57 | 23.33 |
| Tetrazine      | $2^3B_{3u}$ | 2.50 |                                            | 24.35 | 24.05 | 23.90  | 23.83 | 23.61 |
| Tetrazine      | $2^3B_{2u}$ | 2.51 |                                            | 24.30 | 24.06 | 23.93  | 23.87 | 23.69 |
| Formaldehyde   | $1^1A_1$    | 0.48 | 8.97                                       | 8.91  | 8.86  | 8.83   | 8.82  | 8.78  |
| Formaldehyde   | $1^1A_2$    | 2.00 | 8.36                                       | 8.27  | 8.21  | 8.18   | 8.16  | 8.10  |
| Formaldehyde   | $1^1B_1$    | 2.00 | 8.45                                       | 8.35  | 8.30  | 8.26   | 8.24  | 8.18  |
| Formaldehyde   | $2^1A_1$    | 1.38 | 12.68                                      | 12.37 | 12.19 | 12.07  | 12.02 | 11.85 |
| Formaldehyde   | $1^3A_2$    | 2.00 | 8.50                                       | 8.37  | 8.29  | 8.25   | 8.22  | 8.15  |
| Formaldehyde   | $1^3A_1$    | 2.00 | 7.77                                       | 7.70  | 7.65  | 7.62   | 7.60  | 7.56  |
| Acetone        | $1^1A_1$    | 0.10 | 16.99                                      | 16.75 | 16.96 | 16.96  | 16.95 | 16.94 |
| Acetone        | $1^1A_2$    | 2.01 |                                            | 15.78 | 15.71 | 15.66  | 15.64 | 15.57 |
| Acetone        | $1^1B_1$    | 2.00 | 16.23                                      | 17.31 | 16.05 | 16.02  | 16.00 | 15.94 |
| Acetone        | $2^1A_1$    | 1.80 | 19.51                                      | 19.07 | 19.24 | 19.17  | 19.13 | 19.01 |
| Acetone        | $1^3A_2$    | 2.01 | 16.01                                      | 15.83 | 15.74 | 15.69  | 15.66 | 15.58 |
| Acetone        | $1^3A_1$    | 2.00 | 15.96                                      | 15.86 | 15.81 | 15.77  | 15.75 | 15.68 |
| Benzoquinone   | $1^1A_g$    | 0.47 |                                            | 29.08 | 28.99 | 28.96  | 28.94 | 28.89 |
| Benzoquinone   | $1^1B_{1g}$ | 2.20 |                                            | 29.77 | 29.53 | 29.41  | 29.36 | 29.20 |
| Benzoquinone   | $1^1A_u$    | 2.17 |                                            | 29.71 | 29.49 | 29.38  | 29.33 | 29.17 |
| Benzoquinone   | $1^1B_{3g}$ | 2.15 |                                            | 30.74 | 30.67 | 30.53  | 30.47 | 30.29 |
| Benzoquinone   | $2^1A_g$    | 0.28 |                                            | 29.41 | 29.28 | 29.21  | 29.17 | 29.06 |
| Benzoquinone   | $1^1B_{2g}$ | 2.82 |                                            | 30.73 | 29.85 | 29.62  | 29.53 | 29.28 |
| Benzoquinone   | $1^1B_{1u}$ | 2.05 |                                            | 31.85 | 31.66 | 31.53  | 31.47 | 31.29 |
| Benzoquinone   | $1^1B_{3u}$ | 2.81 |                                            | 30.71 | 29.80 | 29.62  | 29.54 | 29.29 |
| Benzoquinone   | $2^1B_{2g}$ | 2.36 |                                            | 32.06 | 31.61 | 31.39  | 31.29 | 30.99 |
| Benzoquinone   | $2^1B_{1g}$ | 2.51 |                                            | 29.76 | 29.43 | 29.26  | 29.19 | 28.96 |
| Benzoquinone   | $2^1A_u$    | 2.51 |                                            | 31.13 | 29.52 | 30.54  | 45.47 | 29.05 |
| Benzoquinone   | $3^1A_g$    | 1.34 |                                            | 29.23 | 29.03 | 28.92  | 28.88 | 28.73 |
| Benzoquinone   | $2^1B_{3g}$ | 2.32 |                                            | 30.38 | 30.49 | 30.34  | 30.27 | 30.06 |
| Benzoquinone   | $1^1B_{2u}$ | 2.32 |                                            | 29.29 | 29.22 | 29.08  | 29.01 | 28.81 |
| Benzoquinone   | $2^1B_{1u}$ | 2.05 |                                            | 33.25 | 33.75 | 33.53  | 33.43 | 33.10 |
| Benzoquinone   | $3^1B_{1u}$ | 2.36 |                                            | 29.43 | 29.62 | 29.47  | 29.41 | 29.21 |
| Benzoquinone   | $3^1B_{1g}$ | 3.12 |                                            | 32.33 | 31.63 | 31.21  | 31.11 | 30.82 |
| Benzoquinone   | $3^1A_u$    | 3.12 |                                            | 30.39 | 29.67 | 29.46  |       | 29.08 |
| Benzoquinone   | $4^1A_g$    | 4.05 |                                            | 29.60 | 29.24 | 29.12  | 29.07 | 28.88 |
| Benzoquinone   | $5^1A_g$    | 1.93 |                                            | 29.69 | 29.48 | 29.33  | 29.27 | 29.06 |
| Benzoquinone   | $1^3B_{1g}$ | 2.14 |                                            | 29.06 | 29.49 | 29.36  | 29.31 | 29.13 |

Table S11: ... continued

| TZVP Basis Set |              |      | CASPT2 with IPEA shift $\epsilon$ [a.u.] = |       |       |        |       |       |
|----------------|--------------|------|--------------------------------------------|-------|-------|--------|-------|-------|
| Molecule       | State        | NOS  | -0.12                                      | 0     | 0.08  | 0.1337 | 0.16  | 0.25  |
| Benzoquinone   | 1 $^3A_u$    | 2.12 |                                            | 29.66 | 29.43 | 29.31  | 29.26 | 29.10 |
| Benzoquinone   | 1 $^3B_{1u}$ | 2.06 |                                            | 29.61 | 28.88 | 28.79  | 28.75 | 28.63 |
| Benzoquinone   | 1 $^3B_{3g}$ | 2.10 |                                            | 29.56 | 29.33 | 29.23  | 29.18 | 29.04 |
| Formamide      | 1 $^1A'$     | 0.06 | 13.90                                      | 13.85 | 13.81 | 13.79  | 13.78 | 13.74 |
| Formamide      | 1 $^1A''$    | 2.00 | 13.13                                      | 13.04 | 12.98 | 12.94  | 12.93 | 12.87 |
| Formamide      | 2 $^1A'$     | 1.98 | 15.97                                      | 15.61 | 15.43 | 15.32  | 15.27 | 15.11 |
| Formamide      | 3 $^1A'$     | 1.38 | 15.80                                      | 15.47 | 15.31 | 15.21  | 15.16 | 15.00 |
| Formamide      | 1 $^3A''$    | 2.00 |                                            | 13.07 | 13.00 | 12.95  | 12.93 | 12.86 |
| Formamide      | 1 $^3A'$     | 2.00 | 13.50                                      | 13.38 | 13.30 | 13.26  | 13.23 | 13.16 |
| Acetamide      | 1 $^1A'$     | 0.08 |                                            | 17.93 | 17.90 | 17.88  | 17.87 | 17.83 |
| Acetamide      | 1 $^1A''$    | 2.00 |                                            | 17.13 | 17.07 | 17.03  | 17.01 | 16.95 |
| Acetamide      | 2 $^1A'$     | 1.97 |                                            | 19.78 | 19.60 | 19.49  | 19.44 | 19.28 |
| Acetamide      | 3 $^1A'$     | 1.53 |                                            | 19.97 | 19.79 | 19.67  | 19.62 | 19.45 |
| Acetamide      | 1 $^3A''$    | 2.00 |                                            | 17.66 | 17.57 | 17.52  | 17.49 | 17.41 |
| Acetamide      | 1 $^3A'$     | 2.00 |                                            | 18.07 | 17.97 | 17.91  | 17.88 | 17.79 |
| Propanamide    | 1 $^1A'$     | 0.08 |                                            | 22.04 | 22.01 | 21.99  | 21.98 | 21.95 |
| Propanamide    | 1 $^1A''$    | 2.00 |                                            | 21.23 | 21.17 | 21.13  | 21.11 | 21.04 |
| Propanamide    | 2 $^1A'$     | 1.98 |                                            | 23.94 | 23.76 | 23.65  | 23.60 | 23.44 |
| Propanamide    | 3 $^1A'$     | 1.56 |                                            | 24.20 | 24.00 | 23.88  | 23.83 | 23.64 |
| Propanamide    | 1 $^3A''$    | 2.00 |                                            | 21.76 | 21.69 | 21.62  | 21.60 | 21.51 |
| Propanamide    | 1 $^3A'$     | 2.00 |                                            | 21.79 | 21.71 | 21.66  | 21.63 | 21.55 |
| Cytosine       | 1 $^1A'$     | 0.09 |                                            | 32.59 | 32.53 | 32.50  | 32.49 | 32.46 |
| Cytosine       | 2 $^1A'$     | 2.09 |                                            | 33.30 | 33.12 | 33.03  | 32.99 | 32.85 |
| Cytosine       | 1 $^1A''$    | 2.25 |                                            | 32.89 | 32.71 | 32.62  | 32.58 | 32.44 |
| Cytosine       | 3 $^1A'$     | 2.01 |                                            | 33.87 | 33.61 | 33.48  | 33.42 | 33.24 |
| Cytosine       | 4 $^1A'$     | 2.15 |                                            | 34.75 | 34.41 | 34.24  | 34.16 | 33.92 |
| Cytosine       | 2 $^1A''$    | 2.27 |                                            | 32.19 | 32.01 | 31.92  | 31.88 | 31.74 |
| Cytosine       | 5 $^1A'$     | 1.90 |                                            | 34.21 | 33.91 | 33.76  | 33.70 | 33.49 |
| Cytosine       | 6 $^1A'$     | 2.12 |                                            | 33.89 | 33.56 | 33.40  | 33.33 | 33.10 |
| Thymine        | 1 $^1A'$     | 0.09 |                                            | 37.04 | 36.99 | 36.97  | 36.96 | 36.93 |
| Thymine        | 1 $^1A''$    | 2.17 |                                            | 36.99 | 36.79 | 36.72  | 36.69 | 36.58 |
| Thymine        | 2 $^1A'$     | 2.03 |                                            | 38.82 | 38.58 | 38.50  | 38.45 | 38.29 |
| Thymine        | 3 $^1A'$     | 2.10 |                                            | 38.58 | 38.24 | 38.19  | 38.13 | 37.94 |
| Thymine        | 2 $^1A''$    | 2.18 |                                            | 37.63 | 36.90 | 36.82  | 36.78 | 36.67 |
| Thymine        | 4 $^1A'$     | 1.92 |                                            | 39.14 | 38.81 | 38.75  | 38.68 | 38.47 |
| Thymine        | 3 $^1A''$    | 2.23 |                                            | 38.35 | 38.04 | 37.89  | 37.84 | 37.67 |
| Thymine        | 5 $^1A'$     | 2.10 |                                            | 39.25 | 38.91 | 38.80  | 38.72 | 38.50 |
| Thymine        | 6 $^1A'$     | 2.05 |                                            | 38.52 |       | 38.36  | 38.10 | 37.74 |

Table S11: ... continued

| TZVP Basis Set |           |      | CASPT2 with IPEA shift $\epsilon$ [a.u.] = |       |       |        |       |      |
|----------------|-----------|------|--------------------------------------------|-------|-------|--------|-------|------|
| Molecule       | State     | NOS  | -0.12                                      | 0     | 0.08  | 0.1337 | 0.16  | 0.25 |
| Uracil         | 1 $^1A'$  | 0.07 | 32.94                                      | 32.89 | 32.87 | 32.86  | 32.84 |      |
| Uracil         | 1 $^1A''$ | 2.17 | 32.77                                      | 32.64 | 32.58 | 32.54  | 32.44 |      |
| Uracil         | 2 $^1A'$  | 2.04 | 34.50                                      | 34.29 | 34.19 | 34.14  | 33.98 |      |
| Uracil         | 3 $^1A'$  | 2.04 | 34.33                                      | 34.11 | 34.00 | 33.95  | 33.78 |      |
| Uracil         | 2 $^1A''$ | 2.18 | 33.03                                      | 32.82 | 33.23 | 32.70  | 32.58 |      |
| Uracil         | 3 $^1A''$ | 2.21 | 34.09                                      | 33.71 | 34.17 | 33.57  | 33.43 |      |
| Uracil         | 4 $^1A'$  | 1.98 | 34.84                                      | 34.57 | 34.43 | 34.37  | 34.18 |      |
| Uracil         | 4 $^1A''$ | 2.16 | 33.65                                      | 33.42 | 33.67 | 33.25  | 33.07 |      |
| Uracil         | 5 $^1A'$  | 2.08 | 34.98                                      | 34.68 | 34.53 | 34.47  | 34.26 |      |
| Adenine        | 1 $^1A'$  | 0.14 | 39.05                                      | 38.97 | 38.94 | 38.92  | 38.87 |      |
| Adenine        | 2 $^1A'$  | 2.07 | 39.58                                      | 39.31 | 39.18 | 39.12  | 38.93 |      |
| Adenine        | 3 $^1A'$  | 2.06 | 40.72                                      | 40.44 | 40.31 | 40.25  | 40.07 |      |
| Adenine        | 1 $^1A''$ | 2.12 | 39.83                                      | 39.60 | 39.56 | 39.49  | 39.32 |      |
| Adenine        | 4 $^1A'$  | 2.02 | 41.44                                      | 41.06 | 40.87 | 40.79  | 40.54 |      |
| Adenine        | 5 $^1A'$  | 1.87 | 40.23                                      | 39.79 | 39.60 | 39.53  | 39.28 |      |
| Adenine        | 2 $^1A''$ | 2.13 | 39.54                                      | 39.37 | 39.28 | 39.23  | 39.09 |      |
| Adenine        | 6 $^1A'$  | 2.11 | 40.48                                      | 40.08 | 39.91 | 39.83  | 39.58 |      |
| Adenine        | 7 $^1A'$  | 2.17 | 40.54                                      | 40.17 | 39.99 | 39.91  | 39.65 |      |

### S3.6 Basis Set Effects

Table S12 collects the contraction scheme of different basis sets used in this study and discussed in section 5.4.1 of the main paper. In Table S23 we list the MSEE of the CASPT2 excitation energies compared to experiment for the Thiel benchmark set (see also Figure 9 in the main paper) for different ANO-RCC basis sets (MB, VDZ, VDZP, VTZP, VQZP) and IPEA shift values ( $\epsilon = 0, 0.10, 0.20, 0.25, 0.30, 0.40,$  and  $0.50$  a.u.). In Tables S13-S22 we show the individual CASPT2 vertical excitation energies  $V^{\text{calc}}$  and approximate dynamical correlation energies  $\tilde{E}^{\text{dyn}}$ . States that experienced intruder state problems are not reported, see section S3.4.

Table S12: Size of contracted basis sets for hydrogen and second-row atoms.

| Basis Set    | Second-Row Atoms | Hydrogen |
|--------------|------------------|----------|
| ANO-RCC-MB   | $2s1p$           | $1s$     |
| ANO-RCC-VDZ  | $3s2p$           | $2s$     |
| ANO-RCC-VDZP | $3s2p1d$         | $2s1p$   |

Table S12: ... continued

| Basis Set                       | Second-Row Atoms | Hydrogen |
|---------------------------------|------------------|----------|
| ANO-RCC-VTZP                    | 4s3p2d1f         | 3s2p1d   |
| ANO-RCC-VQZP                    | 5s4p3d2f1g       | 4s3p2d1f |
| ANO-RCC-IPEA <sup>a</sup>       | 8s7p4d3f2g       | 6s4p3d1f |
| ANO-L-BENCHMARK <sup>b</sup>    | 5s4p3d2s         | 3s2p1d   |
| ANO-L-LITERATURE <sup>c,d</sup> | 4s3p1d           | 2s(1p)   |
| TZVP                            | 5s3p1d           | 3s1p     |

<sup>a</sup> basis set used by Roos and co-workers in the determination of the optimal IPEA shift value<sup>54</sup>

<sup>b</sup> basis set used by Andersson and Roos in benchmark on atomization energies of small molecules<sup>55</sup>

<sup>c</sup> most commonly used basis set in the studies included in the literature survey in section 3

<sup>d</sup> for Rydberg states typically an additional set of (8s8p8d/1s1p1d) diffuse functions was employed

Table S13: CASPT2 vertical excitation energies for the Thiel benchmark set obtained using the ANO-RCC-MB basis set and different IPEA shift parameters ( $\epsilon = 0, 0.10, 0.20, 0.25, 0.30, 0.40,$  and  $0.50$  a.u.).

| MB Basis Set | Molecule        | State                          | Excitation Energy $V^{\text{calc}}$ [eV] |       |       |       |       |       |       |
|--------------|-----------------|--------------------------------|------------------------------------------|-------|-------|-------|-------|-------|-------|
|              |                 |                                | 0                                        | 0.10  | 0.20  | 0.25  | 0.30  | 0.40  | 0.50  |
|              | Ethene          | 1 <sup>1</sup> B <sub>1u</sub> | 10.93                                    | 10.99 | 11.05 | 11.08 | 11.1  | 11.15 | 11.2  |
|              | Ethene          | 1 <sup>3</sup> B <sub>1u</sub> | 4.97                                     | 4.97  | 4.98  | 4.98  | 4.98  | 4.98  | 4.97  |
|              | Butadiene       | 1 <sup>1</sup> B <sub>u</sub>  | 8.49                                     | 8.59  | 8.68  | 8.72  | 8.76  | 8.83  | 8.89  |
|              | Butadiene       | 1 <sup>3</sup> B <sub>u</sub>  | 3.64                                     | 3.66  | 3.69  | 3.71  | 3.72  | 3.74  | 3.76  |
|              | Butadiene       | 1 <sup>3</sup> A <sub>g</sub>  | 5.64                                     | 5.66  | 5.69  | 5.70  | 5.72  | 5.74  | 5.76  |
|              | Hexatriene      | 1 <sup>1</sup> B <sub>u</sub>  | 7.19                                     | 7.28  | 7.34  | 7.37  | 7.39  | 7.44  | 7.48  |
|              | Hexatriene      | 2 <sup>1</sup> A <sub>g</sub>  | 6.01                                     | 6.06  | 6.10  | 6.12  | 6.14  | 6.17  | 6.2   |
|              | Hexatriene      | 1 <sup>3</sup> B <sub>u</sub>  | 2.92                                     | 2.97  | 3.00  | 3.01  | 3.02  | 3.04  | 3.06  |
|              | Hexatriene      | 1 <sup>3</sup> A <sub>g</sub>  | 4.65                                     | 4.70  | 4.73  | 4.75  | 4.76  | 4.79  | 4.81  |
|              | Octatetraene    | 2 <sup>1</sup> A <sub>g</sub>  | 5.08                                     | 5.15  | 5.19  | 5.21  | 5.23  | 5.26  | 5.29  |
|              | Octatetraene    | 1 <sup>1</sup> B <sub>u</sub>  | 6.33                                     | 6.41  | 6.47  | 6.49  | 6.51  | 6.56  | 6.6   |
|              | Octatetraene    | 2 <sup>1</sup> B <sub>u</sub>  | 6.45                                     | 6.55  | 6.64  | 6.67  | 6.71  | 6.77  | 6.82  |
|              | Octatetraene    | 1 <sup>3</sup> B <sub>u</sub>  | 2.50                                     | 2.55  | 2.58  | 2.59  | 2.6   | 2.62  | 2.64  |
|              | Octatetraene    | 1 <sup>3</sup> A <sub>g</sub>  | 3.93                                     | 4.00  | 4.03  | 4.05  | 4.06  | 4.09  | 4.11  |
|              | Cyclopropene    | 1 <sup>1</sup> B <sub>1</sub>  | 8.09                                     | 8.12  | 8.16  | 8.17  | 8.19  | 8.22  | 8.24  |
|              | Cyclopropene    | 1 <sup>1</sup> B <sub>2</sub>  | 9.25                                     | 9.32  | 9.39  | 9.42  | 9.45  | 9.5   | 9.55  |
|              | Cyclopropene    | 1 <sup>3</sup> B <sub>2</sub>  | 4.76                                     | 4.77  | 4.77  | 4.78  | 4.78  | 4.78  | 4.78  |
|              | Cyclopropene    | 1 <sup>3</sup> B <sub>1</sub>  | 7.84                                     | 7.88  | 7.92  | 7.93  | 7.94  | 7.97  | 7.99  |
|              | Cyclopentadiene | 1 <sup>1</sup> B <sub>2</sub>  | 7.53                                     | 7.64  | 7.73  | 7.78  | 7.82  | 7.9   | 7.97  |
|              | Cyclopentadiene | 2 <sup>1</sup> A <sub>1</sub>  | 7.09                                     | 7.19  | 7.26  | 7.29  | 7.32  | 7.37  | 7.41  |
|              | Cyclopentadiene | 3 <sup>1</sup> A <sub>1</sub>  | 10.30                                    | 10.50 | 10.65 | 10.72 | 10.78 | 10.89 | 10.98 |
|              | Cyclopentadiene | 1 <sup>3</sup> B <sub>2</sub>  | 3.73                                     | 3.75  | 3.78  | 3.80  | 3.81  | 3.83  | 3.85  |
|              | Norbornadiene   | 1 <sup>1</sup> A <sub>2</sub>  | 7.54                                     | 7.74  | 7.85  | 7.90  | 7.95  | 8.05  | 8.14  |

Table S13: . . . continued

| MB Basis Set  |              | Excitation Energy $V^{\text{calc}}$ [eV] |       |       |       |       |       |       |
|---------------|--------------|------------------------------------------|-------|-------|-------|-------|-------|-------|
| Molecule      | State        | 0                                        | 0.10  | 0.20  | 0.25  | 0.30  | 0.40  | 0.50  |
| Norbornadiene | 1 $^1B_2$    | 8.08                                     | 8.31  | 8.44  | 8.51  | 8.57  | 8.68  | 8.79  |
| Norbornadiene | 2 $^1B_2$    | 9.98                                     | 10.30 | 10.47 | 10.54 | 10.61 | 10.73 | 10.85 |
| Norbornadiene | 2 $^1A_2$    | 9.52                                     | 9.75  | 9.88  | 9.94  | 10    | 10.11 | 10.21 |
| Norbornadiene | 1 $^3A_2$    | 4.39                                     | 4.52  | 4.55  | 4.56  | 4.57  | 4.6   | 4.62  |
| Norbornadiene | 1 $^3B_2$    | 4.66                                     | 4.78  | 4.81  | 4.83  | 4.84  | 4.87  | 4.89  |
| Benzene       | 2 $^1A'$     | 5.41                                     | 5.45  | 5.50  | 5.52  | 5.53  | 5.57  | 5.6   |
| Benzene       | 3 $^1A'$     | 8.33                                     | 8.45  | 8.56  | 8.60  | 8.65  | 8.73  | 8.8   |
| Benzene       | 4 $^1A'$     | 8.92                                     | 8.99  | 9.04  | 9.07  | 9.09  | 9.13  | 9.16  |
| Benzene       | 5 $^1A'$     | 8.92                                     | 9.01  | 9.07  | 9.09  | 9.12  | 9.16  | 9.2   |
| Benzene       | 6 $^1A'$     | 9.04                                     | 9.20  | 9.34  | 9.40  | 9.46  | 9.56  | 9.66  |
| Benzene       | 7 $^1A'$     | 9.04                                     | 9.20  | 9.34  | 9.40  | 9.46  | 9.57  | 9.66  |
| Benzene       | 1 $^3A'$     | 4.29                                     | 4.32  | 4.35  | 4.36  | 4.38  | 4.4   | 4.42  |
| Benzene       | 2 $^3A'$     | 5.46                                     | 5.54  | 5.59  | 5.61  | 5.63  | 5.67  | 5.7   |
| Benzene       | 3 $^3A'$     | 5.46                                     | 5.54  | 5.59  | 5.62  | 5.64  | 5.68  | 5.71  |
| Benzene       | 4 $^3A'$     | 7.59                                     | 7.70  | 7.80  | 7.84  | 7.88  | 7.96  | 8.02  |
| Naphthalene   | 1 $^1B_{3u}$ | 4.50                                     | 4.57  | 4.61  | 4.63  | 4.65  | 4.69  | 4.72  |
| Naphthalene   | 1 $^1B_{2u}$ | 6.35                                     | 6.44  | 6.51  | 6.55  | 6.58  | 6.64  | 6.69  |
| Naphthalene   | 2 $^1A_g$    | 6.28                                     | 6.37  | 6.42  | 6.45  | 6.48  | 6.53  | 6.57  |
| Naphthalene   | 1 $^1B_{1g}$ | 6.85                                     | 7.01  | 7.08  | 7.11  | 7.15  | 7.2   | 7.25  |
| Naphthalene   | 2 $^1B_{3u}$ | 7.59                                     | 7.75  | 7.88  | 7.93  | 7.99  | 8.08  | 8.17  |
| Naphthalene   | 2 $^1B_{2u}$ | 7.96                                     | 8.06  | 8.15  | 8.20  | 8.23  | 8.3   | 8.37  |
| Naphthalene   | 3 $^1A_g$    | 7.28                                     | 7.41  | 7.49  | 7.52  | 7.56  | 7.61  | 7.67  |
| Naphthalene   | 3 $^1B_{2u}$ | 9.33                                     | 9.46  | 9.53  | 9.57  | 9.6   | 9.66  | 9.72  |
| Furan         | 1 $^1B_2$    | 8.23                                     | 8.36  | 8.46  | 8.50  | 8.54  | 8.61  | 8.68  |
| Furan         | 3 $^1A_1$    | 9.62                                     | 9.85  | 10.01 | 10.08 | 10.14 | 10.26 | 10.36 |
| Furan         | 1 $^3B_2$    | 4.69                                     | 4.71  | 4.73  | 4.74  | 4.76  | 4.78  | 4.8   |
| Furan         | 1 $^3A_1$    | 5.99                                     | 6.04  | 6.08  | 6.10  | 6.12  | 6.15  | 6.18  |
| Pyrrole       | 1 $^1B_2$    | 8.19                                     | 8.32  | 8.42  | 8.47  | 8.51  | 8.58  | 8.65  |
| Pyrrole       | 3 $^1A_1$    | 9.66                                     | 9.87  | 10.01 | 10.07 | 10.13 | 10.23 | 10.32 |
| Pyrrole       | 1 $^3B_2$    | 5.15                                     | 5.18  | 5.21  | 5.22  | 5.23  | 5.26  | 5.28  |
| Pyrrole       | 1 $^3A_1$    | 6.17                                     | 6.23  | 6.28  | 6.31  | 6.33  | 6.37  | 6.4   |
| Imidazole     | 2 $^1A'$     | 7.32                                     | 7.41  | 7.49  | 7.53  | 7.56  | 7.63  | 7.69  |
| Imidazole     | 3 $^1A'$     | 8.36                                     | 8.47  | 8.56  | 8.60  | 8.64  | 8.71  | 8.77  |
| Pyridine      | 2 $^1A_1$    | 8.44                                     | 8.59  | 8.70  | 8.74  | 8.79  | 8.87  | 8.94  |
| Pyridine      | 3 $^1A_1$    | 9.09                                     | 9.20  | 9.27  | 9.31  | 9.34  | 9.39  | 9.44  |
| Pyridine      | 1 $^1B_1$    | 4.83                                     | 4.87  | 4.90  | 4.92  | 4.93  | 4.96  | 4.98  |
| Pyridine      | 1 $^1A_2$    | 5.09                                     | 5.14  | 5.18  | 5.20  | 5.22  | 5.25  | 5.28  |
| Pyridine      | 1 $^3A_1$    | 4.35                                     | 4.39  | 4.42  | 4.43  | 4.44  | 4.47  | 4.49  |

Table S13: ... continued

| MB Basis Set |              | Excitation Energy $V^{\text{calc}}$ [eV] |      |      |      |      |       |       |
|--------------|--------------|------------------------------------------|------|------|------|------|-------|-------|
| Molecule     | State        | 0                                        | 0.10 | 0.20 | 0.25 | 0.30 | 0.40  | 0.50  |
| Pyridine     | 1 $^3B_2$    | 5.56                                     | 5.65 | 5.70 | 5.73 | 5.75 | 5.79  | 5.83  |
| Pyrazine     | 1 $^1B_{2u}$ | 5.62                                     | 5.67 | 5.71 | 5.73 | 5.75 | 5.79  | 5.82  |
| Pyrazine     | 1 $^1B_{1u}$ | 8.52                                     | 8.63 | 8.73 | 8.77 | 8.81 | 8.88  | 8.95  |
| Pyrazine     | 2 $^1B_{1u}$ | 9.49                                     | 9.67 | 9.82 | 9.88 | 9.95 | 10.06 | 10.16 |
| Pyrazine     | 2 $^1B_{2u}$ | 9.34                                     | 9.44 | 9.52 | 9.55 | 9.58 | 9.65  | 9.7   |
| Pyrazine     | 1 $^1B_{3u}$ | 3.96                                     | 4.02 | 4.07 | 4.09 | 4.11 | 4.15  | 4.19  |
| Pyrazine     | 1 $^1B_{2g}$ | 5.51                                     | 5.55 | 5.59 | 5.61 | 5.63 | 5.66  | 5.69  |
| Pyrazine     | 1 $^1B_{1g}$ | 5.93                                     | 6.06 | 6.13 | 6.16 | 6.2  | 6.25  | 6.3   |
| Pyrimidine   | 1 $^1B_2$    | 5.64                                     | 5.69 | 5.73 | 5.75 | 5.77 | 5.81  | 5.84  |
| Pyrimidine   | 2 $^1A_1$    | 8.61                                     | 8.77 | 8.87 | 8.92 | 8.96 | 9.04  | 9.11  |
| Pyrimidine   | 3 $^1A_1$    | 8.77                                     | 8.90 | 9.00 | 9.04 | 9.08 | 9.15  | 9.22  |
| Pyrimidine   | 2 $^1B_2$    | 8.76                                     | 8.87 | 8.94 | 8.98 | 9.01 | 9.06  | 9.11  |
| Pyrimidine   | 1 $^1B_1$    | 4.11                                     | 4.16 | 4.21 | 4.23 | 4.25 | 4.28  | 4.32  |
| Pyrimidine   | 1 $^1A_2$    | 4.28                                     | 4.35 | 4.40 | 4.43 | 4.45 | 4.49  | 4.53  |
| Pyridazine   | 2 $^1A_1$    | 5.49                                     | 5.53 | 5.58 | 5.60 | 5.62 | 5.65  | 5.69  |
| Pyridazine   | 1 $^1B_2$    | 8.16                                     | 8.45 | 8.62 | 8.69 | 8.75 | 8.86  | 8.95  |
| Pyridazine   | 2 $^1B_2$    | 8.83                                     | 8.99 | 9.09 | 9.13 | 9.16 | 9.23  | 9.28  |
| Pyridazine   | 3 $^1A_1$    | 7.79                                     | 7.81 | 7.84 | 7.85 | 7.87 | 7.89  | 7.91  |
| Pyridazine   | 1 $^1B_1$    | 3.67                                     | 3.73 | 3.77 | 3.79 | 3.81 | 3.85  | 3.88  |
| Pyridazine   | 2 $^1A_2$    | 5.52                                     | 5.62 | 5.69 | 5.72 | 4.08 | 4.12  | 4.16  |
| Pyridazine   | 2 $^1B_1$    | 6.16                                     | 6.28 | 6.36 | 6.39 | 6.43 | 6.48  | 6.54  |
| Triazine     | 2 $^1A'$     | 5.86                                     | 5.91 | 5.95 | 5.97 | 5.99 | 6.03  | 6.07  |
| Triazine     | 3 $^1A'$     | 7.61                                     | 7.74 | 7.84 | 7.88 | 7.92 | 8     | 8.07  |
| Triazine     | 4 $^1A'$     | 8.35                                     | 8.51 | 8.61 | 8.65 | 8.7  | 8.77  | 8.85  |
| Triazine     | 2 $^1A''$    | 4.21                                     | 4.32 | 4.41 | 4.45 | 4.48 | 4.54  | 4.6   |
| Triazine     | 3 $^1A''$    | 4.22                                     | 4.33 | 4.41 | 4.45 | 4.48 | 4.55  | 4.6   |
| Triazine     | 4 $^1A''$    | 4.24                                     | 4.40 | 4.52 | 4.56 | 4.61 | 4.69  | 4.77  |
| Tetrazine    | 1 $^1B_{2u}$ | 5.57                                     | 5.61 | 5.65 | 5.67 | 5.69 | 5.73  | 5.76  |
| Tetrazine    | 1 $^1B_{1u}$ | 7.34                                     | 7.48 | 7.58 | 7.63 | 7.66 | 7.74  | 7.8   |
| Tetrazine    | 2 $^1B_{1u}$ | 8.60                                     | 8.86 | 9.03 | 9.10 | 9.16 | 9.28  | 9.39  |
| Tetrazine    | 2 $^1B_{2u}$ | 7.39                                     | 7.52 | 7.61 | 7.65 | 7.69 | 7.76  | 7.82  |
| Tetrazine    | 1 $^1B_{3u}$ | 2.26                                     | 2.32 | 2.37 | 2.39 | 2.41 | 2.45  | 2.48  |
| Tetrazine    | 1 $^1A_u$    | 2.81                                     | 2.89 | 2.96 | 2.98 | 3.01 | 3.06  | 3.11  |
| Tetrazine    | 2 $^1B_{2g}$ | 5.81                                     | 5.95 | 6.04 | 6.08 | 6.12 | 6.19  | 6.25  |
| Tetrazine    | 2 $^1B_{1g}$ | 6.23                                     | 6.35 | 6.45 | 6.49 | 6.53 | 6.61  | 6.67  |
| Tetrazine    | 2 $^1B_{3u}$ | 6.21                                     | 6.31 | 6.41 | 6.45 | 6.49 | 6.56  | 6.62  |
| Tetrazine    | 1 $^3B_{3u}$ | 1.40                                     | 1.46 | 1.51 | 1.53 | 1.55 | 1.6   | 1.64  |
| Tetrazine    | 1 $^3A_u$    | 2.46                                     | 2.55 | 2.62 | 2.65 | 2.68 | 2.74  | 2.79  |

Table S13: ... continued

| MB Basis Set |              | Excitation Energy $V^{\text{calc}}$ [eV] |       |       |       |       |       |       |
|--------------|--------------|------------------------------------------|-------|-------|-------|-------|-------|-------|
| Molecule     | State        | 0                                        | 0.10  | 0.20  | 0.25  | 0.30  | 0.40  | 0.50  |
| Tetrazine    | 1 $^3B_{1g}$ | 3.98                                     | 4.06  | 4.11  | 4.14  | 4.16  | 4.2   | 4.24  |
| Formaldehyde | 1 $^1A_2$    | 3.76                                     | 3.76  | 3.76  | 3.77  | 3.77  | 3.77  | 3.77  |
| Formaldehyde | 1 $^3A_2$    | 3.24                                     | 3.24  | 3.25  | 3.26  | 3.26  | 3.26  | 3.27  |
| Formaldehyde | 1 $^3A_1$    | 5.77                                     | 5.76  | 5.76  | 5.75  | 5.75  | 5.74  | 5.73  |
| Acetone      | 1 $^1A_2$    | 4.13                                     | 4.15  | 4.17  | 4.18  | 4.19  | 4.2   | 4.22  |
| Acetone      | 1 $^3A_2$    | 3.74                                     | 3.77  | 3.79  | 3.80  | 3.81  | 3.83  | 3.85  |
| Acetone      | 1 $^3A_1$    | 5.75                                     | 5.76  | 5.77  | 5.78  | 5.78  | 5.79  | 5.8   |
| Benzoquinone | 1 $^1B_{1g}$ | 2.46                                     | 2.55  | 2.60  | 2.62  | 2.64  | 2.68  | 2.71  |
| Benzoquinone | 1 $^1A_u$    | 2.53                                     | 2.60  | 2.64  | 2.66  | 2.68  | 2.72  | 2.75  |
| Benzoquinone | 1 $^1B_{3g}$ | 5.63                                     | 5.81  | 5.91  | 5.95  | 5.99  | 6.06  | 6.11  |
| Benzoquinone | 1 $^1B_{1u}$ | 6.88                                     | 7.05  | 7.16  | 7.21  | 7.25  | 7.33  | 7.4   |
| Benzoquinone | 2 $^1B_{1u}$ | 7.91                                     | 8.15  | 8.25  | 8.28  | 8.31  | 8.37  | 8.41  |
| Benzoquinone | 1 $^3B_{1g}$ | 2.22                                     | 2.31  | 2.37  | 2.40  | 2.42  | 2.46  | 2.5   |
| Benzoquinone | 1 $^3A_u$    | 2.31                                     | 2.39  | 2.44  | 2.46  | 2.48  | 2.52  | 2.55  |
| Formamide    | 1 $^1A''$    | 5.19                                     | 5.18  | 5.17  | 5.17  | 5.17  | 5.16  | 5.15  |
| Formamide    | 2 $^1A'$     | 8.38                                     | 8.46  | 8.54  | 8.57  | 8.6   | 8.66  | 8.71  |
| Acetamide    | 1 $^1A''$    | 5.28                                     | 5.27  | 5.26  | 5.26  | 5.26  | 5.25  | 5.25  |
| Acetamide    | 2 $^1A'$     | 8.28                                     | 8.37  | 8.44  | 8.47  | 8.5   | 8.56  | 8.61  |
| Acetamide    | 3 $^1A'$     | 11.78                                    | 11.85 | 11.91 | 11.94 | 11.97 | 12.02 | 12.07 |
| Propanamide  | 1 $^1A''$    | 5.32                                     | 5.31  | 5.31  | 5.31  | 5.3   | 5.3   | 5.3   |
| Propanamide  | 2 $^1A'$     | 8.30                                     | 8.39  | 8.46  | 8.50  | 8.53  | 8.59  | 8.64  |
| Propanamide  | 3 $^1A'$     | 11.77                                    | 11.84 | 11.91 | 11.94 | 11.97 | 12.02 | 12.07 |
| Cytosine     | 2 $^1A'$     | 4.68                                     | 4.75  | 4.80  | 4.83  | 4.85  | 4.89  | 4.92  |
| Cytosine     | 1 $^1A''$    | 4.67                                     | 4.73  | 4.78  | 4.80  | 4.82  | 4.86  | 4.89  |
| Cytosine     | 3 $^1A'$     | 5.80                                     | 5.94  | 6.02  | 6.06  | 6.1   | 6.17  | 6.23  |
| Cytosine     | 4 $^1A'$     | 7.01                                     | 7.18  | 7.29  | 7.34  | 7.38  | 7.46  | 7.53  |
| Cytosine     | 5 $^1A'$     | 7.26                                     | 7.39  | 7.49  | 7.53  | 7.57  | 7.65  | 7.72  |
| Thymine      | 1 $^1A''$    | 4.56                                     | 4.58  | 4.61  | 4.62  | 4.63  | 4.66  | 4.68  |
| Thymine      | 2 $^1A'$     | 5.62                                     | 5.74  | 5.82  | 5.85  | 5.88  | 5.94  | 5.99  |
| Thymine      | 3 $^1A'$     | 6.35                                     | 6.48  | 6.57  | 6.60  | 6.63  | 6.69  | 6.74  |
| Thymine      | 4 $^1A'$     | 7.17                                     | 7.36  | 7.48  | 7.53  | 7.57  | 7.65  | 7.73  |
| Thymine      | 5 $^1A'$     | 7.99                                     | 8.19  | 8.32  | 8.38  | 8.44  | 8.53  | 8.62  |
| Uracil       | 1 $^1A''$    | 4.48                                     | 4.51  | 4.54  | 4.56  | 4.57  | 4.59  | 4.61  |
| Uracil       | 2 $^1A'$     | 5.63                                     | 5.74  | 5.82  | 5.85  | 5.88  | 5.94  | 5.99  |
| Uracil       | 3 $^1A'$     | 6.25                                     | 6.39  | 6.46  | 6.50  | 6.53  | 6.59  | 6.64  |
| Uracil       | 4 $^1A'$     | 7.30                                     | 7.48  | 7.60  | 7.65  | 7.69  | 7.77  | 7.85  |
| Uracil       | 5 $^1A'$     | 8.65                                     | 8.80  | 8.90  | 8.94  | 8.98  | 9.05  | 9.11  |
| Adenine      | 2 $^1A'$     | 5.07                                     | 5.19  | 5.27  | 5.30  | 5.33  | 5.39  | 5.44  |

Table S13: ... continued

| MB Basis Set |           | Excitation Energy $V^{\text{calc}}$ [eV] |      |      |      |      |      |      |
|--------------|-----------|------------------------------------------|------|------|------|------|------|------|
| Molecule     | State     | 0                                        | 0.10 | 0.20 | 0.25 | 0.30 | 0.40 | 0.50 |
| Adenine      | 3 $^1A'$  | 6.11                                     | 6.28 | 6.38 | 6.42 | 6.46 | 6.53 | 6.6  |
| Adenine      | 1 $^1A''$ | 4.68                                     | 4.75 | 4.80 | 4.83 |      |      |      |
| Adenine      | 4 $^1A'$  | 7.19                                     | 7.36 | 7.46 | 7.50 | 7.54 | 7.61 | 7.68 |
| Adenine      | 5 $^1A'$  | 7.45                                     | 7.61 | 7.72 | 7.76 | 7.8  | 7.88 | 7.95 |
| Adenine      | 6 $^1A'$  | 7.66                                     | 7.85 | 7.97 | 8.02 | 8.07 | 8.15 | 8.23 |
| Adenine      | 7 $^1A'$  | 8.27                                     | 8.42 | 8.53 | 8.58 | 8.62 | 8.7  | 8.78 |

Table S14: CASPT2 vertical excitation energies for the Thiel benchmark set obtained using the ANO-RCC-VDZ basis set and different IPEA shift parameters ( $\varepsilon = 0, 0.10, 0.20, 0.25, 0.30, 0.40,$  and  $0.50$  a.u.).

| VDZ Basis Set   |              | Excitation Energy $V^{\text{calc}}$ [eV] |      |      |      |      |      |      |
|-----------------|--------------|------------------------------------------|------|------|------|------|------|------|
| Molecule        | State        | 0                                        | 0.10 | 0.20 | 0.25 | 0.30 | 0.40 | 0.50 |
| Ethene          | 1 $^1B_{1u}$ | 8.92                                     | 9.00 | 9.08 | 9.11 | 9.15 | 9.21 | 9.27 |
| Ethene          | 1 $^3B_{1u}$ | 4.56                                     | 4.57 | 4.59 | 4.59 | 4.60 | 4.61 | 4.62 |
| Butadiene       | 1 $^1B_u$    | 6.76                                     | 6.89 | 7.01 | 7.06 | 7.11 | 7.21 | 7.29 |
| Butadiene       | 1 $^3B_u$    | 3.33                                     | 3.37 | 3.47 | 3.45 | 3.48 | 3.53 | 3.57 |
| Butadiene       | 1 $^3A_g$    | 5.23                                     | 5.28 | 5.35 | 5.37 | 5.40 | 5.45 | 5.49 |
| Hexatriene      | 1 $^1B_u$    | 5.56                                     | 5.71 | 5.83 | 5.89 | 5.94 | 6.04 | 6.12 |
| Hexatriene      | 2 $^1A_g$    | 5.39                                     | 5.48 | 5.56 | 5.60 | 5.63 | 5.70 | 5.76 |
| Hexatriene      | 1 $^3B_u$    | 2.64                                     | 2.72 | 2.77 | 2.80 | 2.82 | 2.86 | 2.90 |
| Hexatriene      | 1 $^3A_g$    | 4.28                                     | 4.37 | 4.43 | 4.47 | 4.50 | 4.55 | 4.60 |
| Octatetraene    | 2 $^1A_g$    | 4.55                                     | 4.66 | 4.73 | 4.77 | 4.80 | 4.87 | 4.92 |
| Octatetraene    | 1 $^3B_u$    | 2.26                                     | 2.35 | 2.40 | 2.42 | 2.45 | 2.49 | 2.52 |
| Octatetraene    | 1 $^3A_g$    | 3.62                                     | 3.74 | 3.81 | 3.84 | 3.87 | 3.92 | 3.97 |
| Cyclopropene    | 1 $^1B_1$    | 7.05                                     | 7.12 | 7.18 | 7.20 | 7.23 | 7.28 | 7.33 |
| Cyclopropene    | 1 $^1B_2$    | 7.35                                     | 7.46 | 7.56 | 7.61 | 7.66 | 7.74 | 7.82 |
| Cyclopropene    | 1 $^3B_2$    | 4.35                                     | 4.38 | 4.40 | 4.42 | 4.43 | 4.45 | 4.46 |
| Cyclopropene    | 1 $^3B_1$    | 6.78                                     | 6.86 | 6.92 | 6.91 | 6.97 | 7.02 | 7.07 |
| Cyclopentadiene | 1 $^1B_2$    | 5.97                                     | 6.08 | 6.20 | 6.25 | 6.30 | 6.40 | 6.49 |
| Cyclopentadiene | 2 $^1A_1$    | 6.25                                     | 6.40 | 6.54 | 6.59 | 6.65 | 6.74 | 6.82 |
| Cyclopentadiene | 3 $^1A_1$    | 8.81                                     | 9.04 | 9.23 | 9.31 | 9.38 | 9.52 | 9.64 |
| Cyclopentadiene | 1 $^3B_2$    | 3.42                                     | 3.47 | 3.52 | 3.55 | 3.57 | 3.62 | 3.66 |
| Norbornadiene   | 1 $^1A_2$    | 5.85                                     | 5.95 | 6.07 | 6.10 | 6.19 | 6.29 | 6.39 |
| Norbornadiene   | 1 $^1B_2$    | 6.43                                     | 6.59 | 6.75 | 6.80 | 6.91 | 7.05 | 7.18 |
| Norbornadiene   | 2 $^1B_2$    | 7.78                                     | 7.99 | 8.17 | 8.22 | 8.33 | 8.47 | 8.60 |
| Norbornadiene   | 2 $^1A_2$    | 7.90                                     | 8.03 | 8.17 | 8.21 | 8.31 | 8.43 | 8.55 |
| Norbornadiene   | 1 $^3A_2$    | 3.99                                     | 4.05 | 4.11 | 4.11 | 4.17 | 4.22 | 4.27 |

Table S14: ... continued

| VDZ Basis Set |              | Excitation Energy $V^{\text{calc}}$ [eV] |      |      |      |      |      |      |
|---------------|--------------|------------------------------------------|------|------|------|------|------|------|
| Molecule      | State        | 0                                        | 0.10 | 0.20 | 0.25 | 0.30 | 0.40 | 0.50 |
| Norbornadiene | 1 $^3B_2$    | 4.40                                     | 4.44 | 4.51 | 4.51 | 4.57 | 4.63 | 4.68 |
| Benzene       | 2 $^1A'$     | 5.01                                     | 5.10 | 5.18 | 5.21 | 5.25 | 5.32 | 5.38 |
| Benzene       | 3 $^1A'$     | 6.73                                     | 6.90 | 7.04 | 7.11 | 7.18 | 7.29 | 7.40 |
| Benzene       | 4 $^1A'$     | 7.31                                     | 7.56 | 7.76 | 7.85 | 7.94 | 8.10 | 8.24 |
| Benzene       | 5 $^1A'$     | 7.31                                     | 7.56 | 7.76 | 7.85 | 7.94 | 8.10 | 8.25 |
| Benzene       | 6 $^1A'$     | 8.29                                     | 8.43 | 8.53 | 8.58 | 8.62 | 8.70 | 8.78 |
| Benzene       | 7 $^1A'$     | 8.29                                     | 8.44 | 8.55 | 8.61 | 8.65 | 8.74 | 8.83 |
| Benzene       | 1 $^3A'$     | 4.10                                     | 4.18 | 4.24 | 4.27 | 4.30 | 4.35 | 4.40 |
| Benzene       | 2 $^3A'$     | 4.90                                     | 5.04 | 5.13 | 5.17 | 5.21 | 5.29 | 5.36 |
| Benzene       | 3 $^3A'$     | 4.90                                     | 5.04 | 5.14 | 5.18 | 5.22 | 5.30 | 5.37 |
| Benzene       | 4 $^3A'$     | 6.05                                     | 6.23 | 6.38 | 6.45 | 6.51 | 6.63 | 6.74 |
| Naphthalene   | 1 $^1B_{3u}$ | 4.17                                     | 4.28 | 4.36 | 4.40 | 4.44 | 4.50 | 4.57 |
| Naphthalene   | 1 $^1B_{2u}$ | 5.02                                     | 5.15 | 5.26 | 5.31 | 5.35 | 5.44 | 5.52 |
| Naphthalene   | 2 $^1A_g$    | 5.82                                     | 5.97 | 6.08 | 6.13 | 6.18 | 6.28 | 6.36 |
| Naphthalene   | 1 $^1B_{1g}$ | 6.03                                     | 6.25 | 6.38 | 6.44 | 6.49 | 6.59 | 6.68 |
| Naphthalene   | 2 $^1B_{3u}$ | 6.15                                     | 6.40 | 6.59 | 6.68 | 6.76 | 6.90 | 7.04 |
| Naphthalene   | 2 $^1B_{2u}$ | 6.61                                     | 6.76 | 6.88 | 6.94 | 7.00 | 7.10 | 7.19 |
| Naphthalene   | 3 $^1A_g$    | 6.61                                     | 6.83 | 6.97 | 7.03 | 7.09 | 7.20 | 7.31 |
| Naphthalene   | 3 $^1B_{2u}$ | 8.50                                     | 8.74 | 8.93 | 9.01 | 9.09 | 9.23 | 9.36 |
| Furan         | 1 $^1B_2$    | 7.05                                     | 7.21 | 7.34 | 7.33 | 7.46 | 7.56 | 7.65 |
| Furan         | 3 $^1A_1$    | 8.19                                     | 8.56 | 8.82 | 8.93 | 9.03 | 9.21 | 9.37 |
| Furan         | 1 $^3B_2$    | 4.39                                     | 4.43 | 4.48 | 4.50 | 4.52 | 4.56 | 4.60 |
| Furan         | 1 $^3A_1$    | 5.68                                     | 5.76 | 5.84 | 5.87 | 5.90 | 5.97 | 6.03 |
| Pyrrole       | 1 $^1B_2$    | 6.86                                     | 7.02 | 7.16 | 7.22 | 7.28 | 7.38 | 7.48 |
| Pyrrole       | 3 $^1A_1$    | 8.33                                     | 8.60 | 8.79 | 8.87 | 8.95 | 9.09 | 9.22 |
| Pyrrole       | 1 $^3B_2$    | 4.64                                     | 4.70 | 4.75 | 4.78 | 4.80 | 4.85 | 4.89 |
| Pyrrole       | 1 $^3A_1$    | 5.62                                     | 5.73 | 5.82 | 5.86 | 5.90 | 5.97 | 6.04 |
| Imidazole     | 2 $^1A'$     | 6.38                                     | 6.56 | 6.70 | 6.76 | 6.83 | 6.93 | 7.03 |
| Imidazole     | 3 $^1A'$     | 7.05                                     | 7.21 | 7.34 | 7.40 | 7.46 | 7.57 | 7.67 |
| Pyridine      | 2 $^1A_1$    | 6.41                                     | 6.82 | 7.00 | 7.09 | 7.18 | 7.33 | 7.47 |
| Pyridine      | 3 $^1A_1$    | 7.52                                     | 7.79 | 8.01 | 8.10 | 8.19 | 8.35 | 8.50 |
| Pyridine      | 1 $^1B_1$    | 5.04                                     | 5.11 | 5.17 | 5.20 | 5.58 | 5.64 | 5.69 |
| Pyridine      | 1 $^1A_2$    | 5.36                                     | 5.44 | 5.51 | 5.50 | 5.32 | 5.36 | 5.40 |
| Pyridine      | 1 $^3A_1$    | 4.22                                     | 4.30 | 4.36 | 4.39 | 4.42 | 4.48 | 4.53 |
| Pyridine      | 1 $^3B_2$    | 4.82                                     | 5.00 | 5.11 | 5.16 | 5.20 | 5.28 | 5.36 |
| Pyrazine      | 1 $^1B_{2u}$ | 4.80                                     | 4.92 | 5.01 | 5.05 | 5.10 | 5.17 | 5.24 |
| Pyrazine      | 1 $^1B_{1u}$ | 7.06                                     | 7.21 | 7.34 | 7.40 | 7.46 | 7.57 | 7.67 |
| Pyrazine      | 2 $^1B_{1u}$ | 7.77                                     | 8.01 | 8.21 | 8.29 | 8.38 | 8.54 | 8.68 |

Table S14: ... continued

| VDZ Basis Set |              | Excitation Energy $V^{\text{calc}}$ [eV] |      |      |      |      |      |      |
|---------------|--------------|------------------------------------------|------|------|------|------|------|------|
| Molecule      | State        | 0                                        | 0.10 | 0.20 | 0.25 | 0.30 | 0.40 | 0.50 |
| Pyrazine      | 2 $^1B_{2u}$ | 7.58                                     | 7.81 | 8.01 | 8.09 | 8.18 | 8.33 | 8.48 |
| Pyrazine      | 1 $^1B_{3u}$ | 3.80                                     | 3.90 | 3.99 | 4.03 | 4.07 | 4.15 | 4.22 |
| Pyrazine      | 1 $^1B_{2g}$ | 5.46                                     | 5.55 | 5.63 | 5.66 | 4.60 | 4.71 | 4.81 |
| Pyrazine      | 1 $^1B_{1g}$ | 5.92                                     | 6.19 | 6.31 | 6.38 | 6.45 | 6.56 | 6.67 |
| Pyrimidine    | 1 $^1B_2$    | 5.33                                     | 5.42 | 5.51 | 5.55 | 5.59 | 5.67 | 5.74 |
| Pyrimidine    | 2 $^1A_1$    | 6.74                                     | 7.03 | 7.20 | 7.27 | 7.34 | 7.46 | 7.57 |
| Pyrimidine    | 3 $^1A_1$    | 7.46                                     | 7.66 | 7.84 | 7.92 | 7.99 | 8.13 | 8.25 |
| Pyrimidine    | 2 $^1B_2$    | 7.76                                     | 8.03 | 8.24 | 8.34 | 8.43 | 8.59 | 8.74 |
| Pyrimidine    | 1 $^1B_1$    | 4.35                                     | 4.44 | 4.52 | 4.56 | 4.59 | 4.66 | 4.72 |
| Pyrimidine    | 1 $^1A_2$    | 4.65                                     | 4.76 | 4.85 | 4.90 | 4.94 | 5.02 | 5.09 |
| Pyridazine    | 2 $^1A_1$    | 5.13                                     | 5.22 | 5.30 | 5.34 | 5.38 | 5.45 | 5.52 |
| Pyridazine    | 1 $^1B_2$    | 6.55                                     | 6.84 | 7.03 | 7.11 | 7.19 | 7.33 | 7.45 |
| Pyridazine    | 2 $^1B_2$    | 7.35                                     | 7.59 | 7.79 | 7.88 | 7.96 | 8.11 | 8.25 |
| Pyridazine    | 3 $^1A_1$    | 8.03                                     | 8.09 | 8.14 | 8.16 | 8.19 | 8.24 | 8.28 |
| Pyridazine    | 1 $^1B_1$    | 3.55                                     | 3.65 | 3.74 | 3.78 | 3.82 | 3.89 | 3.96 |
| Pyridazine    | 2 $^1A_2$    | 5.41                                     | 5.57 | 5.68 | 5.74 | 5.78 | 5.88 | 5.96 |
| Pyridazine    | 2 $^1B_1$    | 6.17                                     | 6.35 | 6.48 | 6.54 | 6.59 | 6.69 | 6.78 |
| Triazine      | 2 $^1A'$     | 5.73                                     | 5.81 | 5.89 | 5.92 | 5.96 | 6.03 | 6.09 |
| Triazine      | 3 $^1A'$     | 7.37                                     | 7.56 | 7.72 | 7.79 | 7.85 | 7.97 | 8.08 |
| Triazine      | 4 $^1A'$     | 8.41                                     | 8.61 | 8.77 | 8.85 | 8.92 | 9.05 | 9.17 |
| Triazine      | 2 $^1A''$    | 4.25                                     | 4.55 | 4.68 | 4.73 | 4.79 | 4.91 | 5.03 |
| Triazine      | 3 $^1A''$    | 4.42                                     | 4.57 | 4.71 | 4.77 | 4.83 | 4.94 | 5.04 |
| Triazine      | 4 $^1A''$    | 4.46                                     | 4.59 | 4.72 | 4.78 | 4.84 | 4.95 | 5.05 |
| Tetrazine     | 1 $^1B_{2u}$ | 4.90                                     | 5.03 | 5.13 | 5.18 | 5.23 | 5.31 | 5.39 |
| Tetrazine     | 1 $^1B_{1u}$ | 6.84                                     | 7.18 | 7.43 | 7.53 | 7.63 | 7.80 | 7.96 |
| Tetrazine     | 2 $^1B_{1u}$ | 7.02                                     | 7.29 | 7.51 | 7.60 | 7.69 | 7.86 | 8.01 |
| Tetrazine     | 2 $^1B_{2u}$ | 7.23                                     | 7.45 | 7.61 | 7.68 | 7.75 | 7.88 | 8.00 |
| Tetrazine     | 1 $^1B_{3u}$ | 1.94                                     | 2.06 | 2.15 | 2.19 | 2.23 | 2.31 | 2.38 |
| Tetrazine     | 1 $^1A_u$    | 2.90                                     | 3.08 | 3.21 | 3.27 | 3.32 | 3.42 | 3.52 |
| Tetrazine     | 2 $^1B_{2g}$ | 5.52                                     | 5.73 | 5.90 | 5.97 | 6.04 | 6.18 | 6.29 |
| Tetrazine     | 2 $^1B_{1g}$ | 5.89                                     | 6.08 | 6.26 | 6.34 | 6.42 | 6.56 | 6.69 |
| Tetrazine     | 2 $^1B_{3u}$ | 6.12                                     | 6.33 | 6.49 | 6.56 | 6.62 | 6.75 | 6.86 |
| Tetrazine     | 1 $^3B_{3u}$ | 1.10                                     | 1.22 | 1.33 | 1.37 | 1.42 | 1.50 | 1.58 |
| Tetrazine     | 1 $^3A_u$    | 2.64                                     | 2.83 | 2.97 | 3.03 | 3.09 | 3.21 | 3.31 |
| Tetrazine     | 1 $^3B_{1g}$ | 3.67                                     | 3.82 | 3.93 | 3.98 | 4.03 | 4.12 | 4.21 |
| Formaldehyde  | 1 $^1A_2$    | 4.07                                     | 4.07 | 4.08 | 4.09 | 4.09 | 4.10 | 4.11 |
| Formaldehyde  | 1 $^3A_2$    | 3.62                                     | 3.64 | 3.67 | 3.68 | 3.69 | 3.71 | 3.72 |
| Formaldehyde  | 1 $^3A_1$    | 6.04                                     | 6.03 | 6.02 | 6.02 | 6.01 | 6.00 | 5.99 |

Table S14: ... continued

| VDZ Basis Set |              | Excitation Energy $V^{\text{calc}}$ [eV] |       |       |       |       |       |       |
|---------------|--------------|------------------------------------------|-------|-------|-------|-------|-------|-------|
| Molecule      | State        | 0                                        | 0.10  | 0.20  | 0.25  | 0.30  | 0.40  | 0.50  |
| Acetone       | 1 $^1A_2$    | 4.45                                     | 4.49  | 4.54  | 4.56  | 4.57  | 4.61  | 4.64  |
| Acetone       | 1 $^3A_2$    | 4.18                                     | 4.24  | 4.29  | 4.28  | 4.33  | 4.37  | 4.41  |
| Acetone       | 1 $^3A_1$    | 6.15                                     | 6.19  | 6.21  | 6.23  | 6.24  | 6.26  | 6.29  |
| Benzoquinone  | 1 $^1B_{1g}$ | 2.46                                     | 2.62  | 2.73  | 2.80  | 2.83  | 2.92  | 2.99  |
| Benzoquinone  | 1 $^1A_u$    |                                          | 2.68  | 2.78  | 2.85  | 2.87  | 2.95  | 3.02  |
| Benzoquinone  | 1 $^1B_{3g}$ | 4.19                                     | 4.48  | 4.64  | 4.72  | 4.76  | 4.87  | 4.97  |
| Benzoquinone  | 1 $^1B_{1u}$ | 4.72                                     | 5.00  | 5.18  | 5.29  | 5.34  | 5.47  | 5.60  |
| Benzoquinone  | 2 $^1B_{1u}$ | 6.55                                     | 6.91  | 7.21  | 7.36  | 7.46  | 7.69  | 7.90  |
| Benzoquinone  | 1 $^3B_{1g}$ | 2.28                                     | 2.46  | 2.59  | 2.66  | 2.69  | 2.78  | 2.86  |
| Benzoquinone  | 1 $^3A_u$    | 2.41                                     | 2.55  | 2.66  | 2.73  | 2.76  | 2.84  | 2.92  |
| Formamide     | 1 $^1A''$    | 5.79                                     | 5.80  | 5.82  | 5.82  | 5.83  | 5.84  | 5.85  |
| Formamide     | 2 $^1A'$     | 7.07                                     | 7.27  | 7.42  | 7.48  | 7.54  | 7.65  | 7.74  |
| Formamide     | 1 $^3A''$    | 5.51                                     | 5.55  | 5.58  | 5.59  | 5.60  | 5.63  | 5.65  |
| Acetamide     | 1 $^1A''$    | 5.82                                     | 5.84  | 5.86  | 5.86  | 5.87  | 5.89  | 5.90  |
| Acetamide     | 2 $^1A'$     | 6.87                                     | 7.05  | 7.20  | 7.26  | 7.32  | 7.43  | 7.53  |
| Acetamide     | 3 $^1A'$     | 10.0                                     | 10.22 | 10.36 | 10.42 | 10.48 | 10.60 | 10.70 |
| Propanamide   | 1 $^1A''$    | 5.86                                     | 5.87  | 5.89  | 5.90  | 5.91  | 5.92  | 5.94  |
| Propanamide   | 2 $^1A'$     | 6.80                                     | 6.99  | 7.14  | 7.21  | 7.27  | 7.39  | 7.49  |
| Propanamide   | 3 $^1A'$     | 9.85                                     | 10.04 | 10.19 | 10.26 | 10.33 | 10.45 | 10.56 |
| Cytosine      | 2 $^1A'$     | 4.57                                     | 4.68  | 4.77  | 4.81  | 4.85  | 4.92  | 4.99  |
| Cytosine      | 1 $^1A''$    | 5.16                                     | 5.28  | 5.37  | 5.41  | 5.45  | 5.53  | 5.61  |
| Cytosine      | 3 $^1A'$     | 5.34                                     | 5.55  | 5.70  | 5.76  | 5.82  | 5.94  | 6.05  |
| Cytosine      | 4 $^1A'$     | 6.05                                     | 6.31  | 6.49  | 6.57  | 6.65  | 6.79  | 6.92  |
| Cytosine      | 5 $^1A'$     | 6.79                                     | 7.02  | 7.18  | 7.25  | 7.32  | 7.44  | 7.56  |
| Thymine       | 2 $^1A'$     | 4.95                                     | 5.12  | 5.25  | 5.31  | 5.36  | 5.47  | 5.56  |
| Thymine       | 3 $^1A'$     | 5.91                                     | 6.16  | 6.32  | 6.39  | 6.46  | 6.58  | 6.69  |
| Thymine       | 4 $^1A'$     | 6.14                                     | 6.40  | 6.59  | 6.67  | 6.74  | 6.88  | 7.01  |
| Thymine       | 5 $^1A'$     | 6.93                                     | 7.21  | 7.41  | 7.49  | 7.57  | 7.72  | 7.85  |
| Uracil        | 1 $^1A''$    | 5.13                                     | 5.21  | 5.27  | 5.30  | 5.33  | 5.38  | 5.43  |
| Uracil        | 2 $^1A'$     | 5.07                                     | 5.24  | 5.37  | 5.43  | 5.49  | 5.59  | 5.69  |
| Uracil        | 3 $^1A'$     | 5.98                                     | 6.17  | 6.31  | 6.38  | 6.44  | 6.55  | 6.65  |
| Uracil        | 4 $^1A'$     | 6.35                                     | 6.60  | 6.78  | 6.86  | 6.93  | 7.07  | 7.19  |
| Uracil        | 5 $^1A'$     | 6.89                                     | 7.18  | 7.37  | 7.45  | 7.53  | 7.68  | 7.81  |
| Adenine       | 2 $^1A'$     | 4.98                                     | 5.16  | 5.29  | 5.35  | 5.41  | 5.51  | 5.60  |
| Adenine       | 3 $^1A'$     | 5.27                                     | 5.46  | 5.59  | 5.65  | 5.70  | 5.80  | 5.90  |
| Adenine       | 4 $^1A'$     | 6.10                                     | 6.56  | 6.77  | 6.85  | 6.94  | 7.09  | 7.23  |
| Adenine       | 5 $^1A'$     | 6.36                                     | 6.88  | 7.06  | 7.13  | 7.19  | 7.32  | 7.42  |
| Adenine       | 6 $^1A'$     | 6.75                                     | 7.02  | 7.20  | 7.28  | 7.35  | 7.49  | 7.61  |

Table S14: ... continued

| VDZ Basis Set |           | Excitation Energy $V^{\text{calc}}$ [eV] |      |      |      |      |      |      |
|---------------|-----------|------------------------------------------|------|------|------|------|------|------|
| Molecule      | State     | 0                                        | 0.10 | 0.20 | 0.25 | 0.30 | 0.40 | 0.50 |
| Adenine       | $7\ ^1A'$ | 7.05                                     | 7.79 | 7.98 | 8.06 | 8.14 | 8.28 | 8.42 |

Table S15: CASPT2 vertical excitation energies for the Thiel benchmark set obtained using the ANO-RCC-VDZP basis set and different IPEA shift parameters ( $\varepsilon = 0, 0.10, 0.20, 0.25, 0.30, 0.40, \text{ and } 0.50$  a.u.).

| VDZP Basis Set  |               | Excitation Energy $V^{\text{calc}}$ [eV] |      |      |      |      |      |      |
|-----------------|---------------|------------------------------------------|------|------|------|------|------|------|
| Molecule        | State         | 0                                        | 0.10 | 0.20 | 0.25 | 0.30 | 0.40 | 0.50 |
| Ethene          | $1\ ^1B_{1u}$ | 8.36                                     | 8.47 | 8.57 | 8.61 | 8.66 | 8.74 | 8.82 |
| Ethene          | $1\ ^3B_{1u}$ | 4.40                                     | 4.45 | 4.48 | 4.50 | 4.52 | 4.55 | 4.58 |
| Butadiene       | $1\ ^1B_u$    | 6.18                                     | 6.35 | 6.50 | 6.57 | 6.63 | 6.76 | 6.87 |
| Butadiene       | $1\ ^3B_u$    | 3.19                                     | 3.28 | 3.36 | 3.40 | 3.44 | 3.51 | 3.58 |
| Butadiene       | $1\ ^3A_g$    | 5.00                                     | 5.10 | 5.20 | 5.25 | 5.30 | 5.38 | 5.46 |
| Hexatriene      | $1\ ^1B_u$    | 4.95                                     | 5.14 | 5.30 | 5.37 | 5.43 | 5.55 | 5.66 |
| Hexatriene      | $2\ ^1A_g$    | 5.15                                     | 5.29 | 5.41 | 5.46 | 5.52 | 5.62 | 5.72 |
| Hexatriene      | $1\ ^3B_u$    | 2.69                                     | 2.75 | 2.77 | 2.81 | 2.79 | 2.86 | 2.92 |
| Hexatriene      | $1\ ^3A_g$    | 4.08                                     | 4.22 | 4.33 | 4.38 | 4.42 | 4.52 | 4.60 |
| Octatetraene    | $2\ ^1A_g$    | 4.34                                     | 4.49 | 4.61 | 4.67 | 4.72 | 4.82 | 4.91 |
| Octatetraene    | $1\ ^1B_u$    | 4.35                                     | 4.52 | 4.67 | 4.73 | 4.80 | 4.91 | 5.02 |
| Octatetraene    | $2\ ^1B_u$    | 5.43                                     | 5.63 | 5.79 | 5.86 | 5.93 | 6.06 | 6.18 |
| Octatetraene    | $1\ ^3B_u$    | 2.15                                     | 2.27 | 2.35 | 2.39 | 2.43 | 2.50 | 2.56 |
| Octatetraene    | $1\ ^3A_g$    | 3.45                                     | 3.61 | 3.72 | 3.78 | 3.82 | 3.92 | 4.00 |
| Cyclopropene    | $1\ ^1B_1$    | 6.61                                     | 6.70 | 6.78 | 6.82 | 6.86 | 6.94 | 7.01 |
| Cyclopropene    | $1\ ^1B_2$    | 6.70                                     | 6.85 | 6.97 | 7.04 | 7.09 | 7.20 | 7.30 |
| Cyclopropene    | $1\ ^3B_2$    | 4.21                                     | 4.26 | 4.31 | 4.34 | 4.36 | 4.40 | 4.44 |
| Cyclopropene    | $1\ ^3B_1$    | 6.29                                     | 6.40 | 6.49 | 6.53 | 6.58 | 6.65 | 6.72 |
| Cyclopentadiene | $1\ ^1B_2$    | 5.39                                     | 5.53 | 5.67 | 5.74 | 5.80 | 5.92 | 6.03 |
| Cyclopentadiene | $2\ ^1A_1$    | 5.87                                     | 6.09 | 6.28 | 6.36 | 6.43 | 6.57 | 6.70 |
| Cyclopentadiene | $3\ ^1A_1$    | 8.17                                     | 8.49 | 8.88 | 8.97 | 8.96 | 9.16 | 9.33 |
| Cyclopentadiene | $1\ ^3B_2$    | 3.28                                     | 3.35 | 3.44 | 3.47 | 3.51 | 3.58 | 3.65 |
| Norbornadiene   | $1\ ^1A_2$    | 5.07                                     | 5.38 | 5.50 | 5.57 | 5.61 | 5.76 | 5.87 |
| Norbornadiene   | $1\ ^1B_2$    | 5.98                                     | 6.37 | 6.56 | 6.66 | 6.73 | 6.93 | 7.10 |
| Norbornadiene   | $2\ ^1B_2$    | 7.62                                     | 7.99 | 8.14 | 8.22 | 8.27 | 8.44 | 8.57 |
| Norbornadiene   | $2\ ^1A_2$    | 7.21                                     | 7.55 | 7.70 | 7.77 | 7.83 | 8.00 | 8.13 |
| Benzene         | $2\ ^1A'$     | 4.81                                     | 4.94 | 5.06 | 5.12 | 5.18 | 5.29 | 5.39 |
| Benzene         | $3\ ^1A'$     | 6.01                                     | 6.23 | 6.42 | 6.51 | 6.59 | 6.75 | 6.89 |
| Benzene         | $4\ ^1A'$     | 6.65                                     | 6.95 | 7.21 | 7.33 | 7.44 | 7.64 | 7.82 |
| Benzene         | $5\ ^1A'$     | 6.65                                     | 6.95 | 7.21 | 7.33 | 7.44 | 7.64 | 7.83 |

Table S15: ... continued

| VDZP Basis Set |              | Excitation Energy $V^{\text{calc}}$ [eV] |      |      |      |      |      |      |
|----------------|--------------|------------------------------------------|------|------|------|------|------|------|
| Molecule       | State        | 0                                        | 0.10 | 0.20 | 0.25 | 0.30 | 0.40 | 0.50 |
| Benzene        | 6 $^1A'$     | 7.87                                     | 8.08 | 8.23 | 8.30 | 8.37 | 8.50 | 8.62 |
| Benzene        | 7 $^1A'$     | 7.87                                     | 8.09 | 8.25 | 8.33 | 8.40 | 8.54 | 8.67 |
| Benzene        | 1 $^3A'$     | 3.94                                     | 4.07 | 4.17 | 4.22 | 4.27 | 4.36 | 4.44 |
| Benzene        | 2 $^3A'$     | 4.54                                     | 4.73 | 4.87 | 4.93 | 5.00 | 5.11 | 5.22 |
| Benzene        | 3 $^3A'$     | 4.54                                     | 4.73 | 4.88 | 4.94 | 5.01 | 5.12 | 5.23 |
| Benzene        | 4 $^3A'$     | 5.25                                     | 5.47 | 5.67 | 5.76 | 5.85 | 6.02 | 6.16 |
| Naphthalene    | 1 $^1B_{3u}$ | 3.95                                     | 4.12 | 4.24 | 4.30 | 4.36 | 4.47 | 4.57 |
| Naphthalene    | 1 $^1B_{2u}$ | 4.39                                     | 4.56 | 4.70 | 4.77 | 4.83 | 4.95 | 5.06 |
| Naphthalene    | 2 $^1A_g$    | 5.55                                     | 5.76 | 5.93 | 6.01 | 6.09 | 6.23 | 6.37 |
| Naphthalene    | 1 $^1B_{1g}$ | 5.54                                     | 5.83 | 6.02 | 6.10 | 6.18 | 6.33 | 6.47 |
| Naphthalene    | 2 $^1B_{3u}$ | 5.52                                     | 5.83 | 6.08 | 6.19 | 6.29 | 6.48 | 6.66 |
| Naphthalene    | 2 $^1B_{2u}$ | 5.95                                     | 6.15 | 6.32 | 6.40 | 6.47 | 6.61 | 6.74 |
| Naphthalene    | 3 $^1A_g$    | 6.16                                     | 6.46 | 6.66 | 6.76 | 5.67 | 5.80 | 5.92 |
| Naphthalene    | 3 $^1B_{2u}$ | 7.75                                     | 8.06 | 8.30 | 8.41 | 8.51 | 8.70 | 8.87 |
| Furan          | 1 $^1B_2$    | 6.32                                     | 6.59 | 6.75 | 6.83 | 6.90 | 7.03 | 7.15 |
| Furan          | 3 $^1A_1$    | 7.58                                     | 8.02 | 8.33 | 8.46 | 8.59 | 8.81 | 9.02 |
| Furan          | 1 $^3B_2$    | 4.22                                     | 4.29 | 4.36 | 4.39 | 4.42 | 4.48 | 4.54 |
| Furan          | 1 $^3A_1$    | 5.44                                     | 5.56 | 5.67 | 5.72 | 5.77 | 5.86 | 5.95 |
| Pyrrole        | 1 $^1B_2$    | 6.31                                     | 6.52 | 6.71 | 6.79 | 6.86 | 7.01 | 7.14 |
| Pyrrole        | 3 $^1A_1$    | 7.78                                     | 8.10 | 8.34 | 8.45 | 8.55 | 8.74 | 8.91 |
| Pyrrole        | 1 $^3B_2$    | 4.44                                     | 4.52 | 4.60 | 4.64 | 4.68 | 4.75 | 4.82 |
| Pyrrole        | 1 $^3A_1$    | 5.31                                     | 5.46 | 5.59 | 5.65 | 5.71 | 5.82 | 5.93 |
| Imidazole      | 2 $^1A'$     | 5.84                                     | 6.08 | 6.17 | 6.35 | 6.44 | 6.60 | 6.74 |
| Imidazole      | 3 $^1A'$     | 6.64                                     | 6.82 | 6.82 | 7.07 | 7.14 | 7.28 | 7.41 |
| Pyridine       | 2 $^1A_1$    | 5.59                                     | 6.05 | 6.31 | 6.42 | 6.53 | 6.72 | 6.90 |
| Pyridine       | 3 $^1A_1$    | 6.90                                     | 7.23 | 7.49 | 7.61 | 7.72 | 7.93 | 8.13 |
| Pyridine       | 1 $^1B_1$    | 5.01                                     | 5.11 | 5.19 | 5.23 | 5.60 | 5.68 | 5.76 |
| Pyridine       | 1 $^1A_2$    | 5.30                                     | 5.41 | 5.51 | 5.56 | 5.20 | 5.27 | 5.34 |
| Pyridine       | 1 $^3A_1$    | 4.04                                     | 4.17 | 4.28 | 4.33 | 4.38 | 4.47 | 4.56 |
| Pyridine       | 1 $^3B_2$    | 4.21                                     | 4.48 | 4.66 | 4.73 | 4.80 | 4.93 | 5.05 |
| Pyrazine       | 1 $^1B_{2u}$ | 4.56                                     | 4.73 | 4.87 | 4.94 | 5.00 | 5.12 | 5.22 |
| Pyrazine       | 1 $^1B_{1u}$ | 6.47                                     | 6.65 | 6.82 | 6.90 | 6.97 | 7.11 | 7.24 |
| Pyrazine       | 2 $^1B_{1u}$ | 7.29                                     | 7.57 | 7.81 | 7.92 | 8.02 | 8.21 | 8.38 |
| Pyrazine       | 2 $^1B_{2u}$ | 7.20                                     | 7.46 | 7.69 | 7.80 | 7.90 | 8.08 | 8.25 |
| Pyrazine       | 1 $^1B_{3u}$ | 3.84                                     | 3.99 | 4.11 | 4.17 | 4.23 | 4.33 | 4.43 |
| Pyrazine       | 1 $^1B_{2g}$ | 5.43                                     | 5.57 | 5.69 | 5.74 | 5.80 | 5.90 | 6.00 |
| Pyrazine       | 1 $^1B_{1g}$ | 5.86                                     | 6.15 | 6.36 | 6.45 | 6.54 | 6.71 | 6.86 |
| Pyrimidine     | 1 $^1B_2$    | 5.02                                     | 5.18 | 5.32 | 5.39 | 5.45 | 5.57 | 5.68 |

Table S15: . . . continued

| VDZP Basis Set |              | Excitation Energy $V^{\text{calc}}$ [eV] |      |      |      |      |      |      |
|----------------|--------------|------------------------------------------|------|------|------|------|------|------|
| Molecule       | State        | 0                                        | 0.10 | 0.20 | 0.25 | 0.30 | 0.40 | 0.50 |
| Pyrimidine     | 2 $^1A_1$    | 6.10                                     | 6.40 | 6.58 | 6.66 | 6.74 | 6.88 | 7.01 |
| Pyrimidine     | 3 $^1A_1$    | 6.73                                     | 7.00 | 7.23 | 7.34 | 7.44 | 7.63 | 7.80 |
| Pyrimidine     | 2 $^1B_2$    | 6.81                                     | 7.21 | 7.51 | 7.66 | 7.79 | 8.03 | 8.24 |
| Pyrimidine     | 1 $^1B_1$    | 4.27                                     | 4.39 | 4.50 | 4.55 | 4.60 | 4.70 | 4.79 |
| Pyrimidine     | 1 $^1A_2$    | 4.58                                     | 4.72 | 4.84 | 4.90 | 4.96 | 5.06 | 5.17 |
| Pyridazine     | 2 $^1A_1$    | 4.90                                     | 5.04 | 5.17 | 5.23 | 5.29 | 5.40 | 5.50 |
| Pyridazine     | 1 $^1B_2$    | 5.75                                     | 6.09 | 6.31 | 6.41 | 6.50 | 6.67 | 6.83 |
| Pyridazine     | 2 $^1B_2$    | 6.72                                     | 7.07 | 7.34 | 7.46 | 7.57 | 7.77 | 7.96 |
| Pyridazine     | 3 $^1A_1$    | 5.76                                     | 7.34 | 7.61 | 7.73 | 7.84 | 8.05 | 8.23 |
| Pyridazine     | 1 $^1B_1$    | 3.55                                     | 3.69 | 3.81 | 3.87 | 3.92 | 4.03 | 4.12 |
| Pyridazine     | 2 $^1A_2$    | 5.52                                     | 5.70 | 5.84 | 5.91 | 5.98 | 6.10 | 6.22 |
| Pyridazine     | 2 $^1B_1$    | 6.19                                     | 6.41 | 6.57 | 6.65 | 6.72 | 6.86 | 6.99 |
| Triazine       | 2 $^1A'$     | 5.51                                     | 5.64 | 5.76 | 5.82 | 5.88 | 5.98 | 6.08 |
| Triazine       | 3 $^1A'$     | 6.80                                     | 7.03 | 7.21 | 7.30 | 7.38 | 7.52 | 7.66 |
| Triazine       | 4 $^1A'$     | 6.88                                     | 7.23 | 7.50 | 7.62 | 7.74 | 7.95 | 8.14 |
| Triazine       | 2 $^1A''$    | 4.21                                     | 4.56 | 4.74 | 4.83 | 4.90 | 5.05 | 5.19 |
| Triazine       | 3 $^1A''$    | 4.37                                     | 4.59 | 4.78 | 4.86 | 4.95 | 5.10 | 5.25 |
| Triazine       | 4 $^1A''$    | 4.43                                     | 4.61 | 4.80 | 4.88 | 4.96 | 5.11 | 5.26 |
| Tetrazine      | 1 $^1B_{2u}$ | 4.57                                     | 4.75 | 4.90 | 4.97 | 5.03 | 5.15 | 5.27 |
| Tetrazine      | 1 $^1B_{1u}$ | 6.32                                     | 6.58 | 6.81 | 6.91 | 7.01 | 7.19 | 7.36 |
| Tetrazine      | 2 $^1B_{1u}$ | 6.80                                     | 7.10 | 7.34 | 7.44 | 7.55 | 7.74 | 7.91 |
| Tetrazine      | 2 $^1B_{2u}$ | 7.31                                     | 7.65 | 7.89 | 8.00 | 8.10 | 8.29 | 8.46 |
| Tetrazine      | 1 $^1B_{3u}$ | 1.96                                     | 2.11 | 2.24 | 2.30 | 2.35 | 2.46 | 2.56 |
| Tetrazine      | 1 $^1A_u$    | 3.06                                     | 3.29 | 3.46 | 3.54 | 3.61 | 3.75 | 3.87 |
| Tetrazine      | 2 $^1B_{2g}$ | 5.35                                     | 5.77 | 5.99 | 6.09 | 6.19 | 6.37 | 6.54 |
| Tetrazine      | 2 $^1B_{1g}$ | 5.85                                     | 6.13 | 6.38 | 6.49 | 6.60 | 6.80 | 6.98 |
| Tetrazine      | 2 $^1B_{3u}$ | 6.27                                     | 6.53 | 6.74 | 6.84 | 6.93 | 7.10 | 7.26 |
| Tetrazine      | 1 $^3B_{3u}$ | 1.26                                     | 1.42 | 1.55 | 1.61 | 1.67 | 1.79 | 1.89 |
| Tetrazine      | 1 $^3A_u$    | 2.79                                     | 3.02 | 3.21 | 3.30 | 3.38 | 3.53 | 3.67 |
| Tetrazine      | 1 $^3B_{1g}$ | 3.74                                     | 3.94 | 4.10 | 4.17 | 4.23 | 4.36 | 4.48 |
| Formaldehyde   | 1 $^1A_2$    | 4.15                                     | 4.16 | 4.18 | 4.19 | 4.20 | 4.22 | 4.24 |
| Formaldehyde   | 1 $^3A_2$    | 3.67                                     | 3.71 | 3.75 | 3.77 | 3.79 | 3.83 | 3.86 |
| Formaldehyde   | 1 $^3A_1$    | 6.04                                     | 6.04 | 6.05 | 6.05 | 6.06 | 6.07 | 6.07 |
| Acetone        | 1 $^1A_2$    | 4.46                                     | 4.54 | 4.61 | 4.64 | 4.67 | 4.73 | 4.79 |
| Acetone        | 1 $^3A_2$    | 4.14                                     | 4.24 | 4.33 | 4.37 | 4.41 | 4.49 | 4.55 |
| Acetone        | 1 $^3A_1$    | 6.17                                     | 6.23 | 6.29 | 6.32 | 6.34 | 6.39 | 6.44 |
| Benzoquinone   | 1 $^1B_{1g}$ | 2.36                                     | 2.55 | 2.71 | 2.77 | 2.84 | 2.96 | 3.07 |
| Benzoquinone   | 1 $^1A_u$    | 2.42                                     | 2.58 | 2.73 | 2.79 | 2.85 | 2.97 | 3.09 |

Table S15: ... continued

| VDZP Basis Set |              | Excitation Energy $V^{\text{calc}}$ [eV] |      |      |       |       |       |       |
|----------------|--------------|------------------------------------------|------|------|-------|-------|-------|-------|
| Molecule       | State        | 0                                        | 0.10 | 0.20 | 0.25  | 0.30  | 0.40  | 0.50  |
| Benzoquinone   | 1 $^1B_{3g}$ | 3.65                                     | 3.90 | 4.08 | 4.15  | 4.23  | 4.36  | 4.47  |
| Benzoquinone   | 1 $^1B_{1u}$ | 4.64                                     | 4.85 | 5.02 | 5.09  | 5.16  | 5.30  | 5.42  |
| Benzoquinone   | 2 $^1B_{1u}$ | 6.11                                     | 6.52 | 6.86 | 7.01  | 7.16  | 7.43  | 7.68  |
| Benzoquinone   | 1 $^3B_{1g}$ | 2.19                                     | 2.40 | 2.57 | 2.64  | 2.71  | 2.84  | 2.96  |
| Benzoquinone   | 1 $^3A_u$    | 2.27                                     | 2.46 | 2.61 | 2.68  | 2.75  | 2.87  | 2.99  |
| Formamide      | 1 $^1A''$    | 5.80                                     | 5.83 | 5.86 | 5.88  | 5.89  | 5.92  | 5.95  |
| Formamide      | 2 $^1A'$     | 7.02                                     | 7.21 | 7.36 | 7.43  | 7.50  | 7.62  | 7.73  |
| Formamide      | 1 $^3A''$    | 5.53                                     | 5.59 | 5.64 | 5.67  | 5.69  | 5.74  | 5.78  |
| Acetamide      | 1 $^1A''$    | 5.79                                     | 5.82 | 5.86 | 5.88  | 5.90  | 5.93  | 5.97  |
| Acetamide      | 2 $^1A'$     | 6.80                                     | 6.99 | 7.14 | 7.22  | 7.28  | 7.41  | 7.52  |
| Acetamide      | 3 $^1A'$     | 9.53                                     | 9.74 | 9.92 | 10.00 | 10.08 | 10.22 | 10.36 |
| Propanamide    | 1 $^1A''$    | 5.81                                     | 5.85 | 5.89 | 5.91  | 5.92  | 5.96  | 6.00  |
| Propanamide    | 2 $^1A'$     | 6.73                                     | 6.92 | 7.09 | 7.16  | 7.23  | 7.36  | 7.48  |
| Propanamide    | 3 $^1A'$     | 9.34                                     | 9.57 | 9.76 | 9.85  | 9.93  | 10.09 | 10.23 |
| Cytosine       | 2 $^1A'$     | 4.40                                     | 4.55 | 4.68 | 4.73  | 4.79  | 4.90  | 5.00  |
| Cytosine       | 1 $^1A''$    | 5.09                                     | 5.26 | 5.39 | 5.45  | 5.51  | 5.63  | 5.73  |
| Cytosine       | 3 $^1A'$     | 5.13                                     | 5.36 | 5.54 | 5.63  | 5.71  | 5.85  | 5.99  |
| Cytosine       | 4 $^1A'$     | 5.83                                     | 6.14 | 6.36 | 6.46  | 6.56  | 6.74  | 6.91  |
| Cytosine       | 5 $^1A'$     | 6.49                                     | 6.78 | 7.00 | 7.10  | 7.20  | 7.37  | 7.54  |
| Thymine        | 1 $^1A''$    | 5.03                                     | 5.14 | 5.23 | 5.27  | 5.31  | 5.39  | 5.46  |
| Thymine        | 2 $^1A'$     | 4.64                                     | 4.84 | 5.00 | 5.07  | 5.14  | 5.28  | 5.40  |
| Thymine        | 3 $^1A'$     | 5.64                                     | 5.89 | 6.08 | 6.17  | 6.25  | 6.40  | 6.54  |
| Thymine        | 4 $^1A'$     | 5.95                                     | 6.22 | 6.42 | 6.51  | 6.60  | 6.76  | 6.91  |
| Thymine        | 5 $^1A'$     | 6.77                                     | 7.09 | 7.31 | 7.42  | 7.51  | 7.69  | 7.86  |
| Uracil         | 1 $^1A''$    | 5.00                                     | 5.12 | 5.21 | 5.25  | 5.30  | 5.38  | 5.45  |
| Uracil         | 2 $^1A'$     | 4.79                                     | 4.99 | 5.15 | 5.22  | 5.29  | 5.43  | 5.55  |
| Uracil         | 3 $^1A'$     | 5.73                                     | 5.94 | 6.10 | 6.18  | 6.25  | 6.39  | 6.52  |
| Uracil         | 4 $^1A'$     | 6.18                                     | 6.45 | 6.65 | 6.74  | 6.83  | 6.99  | 7.13  |
| Uracil         | 5 $^1A'$     | 6.78                                     | 7.09 | 7.31 | 7.42  | 7.51  | 7.69  | 7.85  |
| Adenine        | 2 $^1A'$     | 4.80                                     | 5.03 | 5.20 | 5.27  | 5.35  | 5.49  | 5.62  |
| Adenine        | 3 $^1A'$     | 4.90                                     | 5.13 | 5.29 | 5.36  | 5.44  | 5.57  | 5.70  |
| Adenine        | 1 $^1A''$    | 5.01                                     | 5.08 | 5.31 | 5.37  | 5.43  | 5.55  | 5.66  |
| Adenine        | 4 $^1A'$     | 5.78                                     | 6.16 | 6.40 | 6.51  | 6.62  | 6.81  | 6.99  |
| Adenine        | 5 $^1A'$     | 6.21                                     | 6.55 | 6.74 | 6.83  | 6.91  | 7.07  | 7.21  |
| Adenine        | 6 $^1A'$     | 6.33                                     | 6.68 | 6.91 | 7.01  | 7.11  | 7.29  | 7.46  |
| Adenine        | 7 $^1A'$     | 6.93                                     | 7.42 | 7.65 | 7.76  | 7.86  | 8.06  | 8.24  |

Table S16: CASPT2 vertical excitation energies for the Thiel benchmark set obtained using the ANO-RCC-VTZP basis set and different IPEA shift parameters ( $\varepsilon = 0, 0.10, 0.20, 0.25, 0.30, 0.40,$  and  $0.50$  a.u.).

| VTZP Basis Set  |              | Excitation Energy $V^{\text{calc}}$ [eV] |      |      |      |      |      |      |
|-----------------|--------------|------------------------------------------|------|------|------|------|------|------|
| Molecule        | State        | 0                                        | 0.10 | 0.20 | 0.25 | 0.30 | 0.40 | 0.50 |
| Ethene          | 1 $^1B_{1u}$ | 8.08                                     | 8.18 | 8.28 | 8.32 | 8.36 | 8.44 | 8.52 |
| Ethene          | 1 $^3B_{1u}$ | 4.37                                     | 4.42 | 4.46 | 4.48 | 4.50 | 4.54 | 4.57 |
| Butadiene       | 1 $^1B_u$    | 5.89                                     | 6.07 | 6.23 | 6.30 | 6.37 | 6.50 | 6.62 |
| Butadiene       | 1 $^3B_u$    | 3.19                                     | 3.28 | 3.37 | 3.42 | 3.46 | 3.53 | 3.60 |
| Butadiene       | 1 $^3A_g$    | 4.95                                     | 5.07 | 5.18 | 5.23 | 5.28 | 5.38 | 5.46 |
| Hexatriene      | 1 $^1B_u$    | 4.47                                     | 4.91 | 5.06 | 5.14 | 5.21 | 5.34 | 5.46 |
| Hexatriene      | 2 $^1A_g$    | 5.05                                     | 5.21 | 5.35 | 5.41 | 5.47 | 5.59 | 5.69 |
| Hexatriene      | 1 $^3B_u$    | 2.49                                     | 2.61 | 2.70 | 2.74 | 2.78 | 2.85 | 2.92 |
| Hexatriene      | 1 $^3A_g$    | 4.03                                     | 4.17 | 4.30 | 4.35 | 4.41 | 4.51 | 4.60 |
| Octatetraene    | 2 $^1A_g$    | 4.28                                     | 4.44 | 4.57 | 4.63 | 4.69 | 4.80 | 4.90 |
| Octatetraene    | 1 $^1B_u$    | 4.13                                     | 4.32 | 4.48 | 4.54 | 4.61 | 4.74 | 4.85 |
| Octatetraene    | 2 $^1B_u$    | 5.27                                     | 5.51 | 5.69 | 5.77 | 5.85 | 6.00 | 6.14 |
| Octatetraene    | 1 $^3B_u$    | 2.12                                     | 2.25 | 2.34 | 2.38 | 2.42 | 2.49 | 2.56 |
| Octatetraene    | 1 $^3A_g$    | 3.40                                     | 3.58 | 3.70 | 3.76 | 3.81 | 3.91 | 4.01 |
| Cyclopropene    | 1 $^1B_1$    | 6.35                                     | 6.46 | 6.55 | 6.59 | 6.64 | 6.72 | 6.79 |
| Cyclopropene    | 1 $^1B_2$    | 6.45                                     | 6.59 | 6.72 | 6.78 | 6.84 | 6.95 | 7.05 |
| Cyclopropene    | 1 $^3B_2$    | 4.14                                     | 4.21 | 4.26 | 4.29 | 4.32 | 4.36 | 4.41 |
| Cyclopropene    | 1 $^3B_1$    | 6.06                                     | 6.18 | 6.28 | 6.33 | 6.38 | 6.46 | 6.54 |
| Cyclopentadiene | 2 $^1A_1$    | 5.68                                     | 5.92 | 6.14 | 6.23 | 6.32 | 6.48 | 6.62 |
| Cyclopentadiene | 3 $^1A_1$    | 7.42                                     | 7.91 | 8.21 | 8.34 | 8.47 | 8.70 | 8.91 |
| Norbornadiene   | 1 $^1A_2$    | 5.97                                     | 6.02 | 6.12 | 6.17 | 6.21 | 6.25 | 6.37 |
| Norbornadiene   | 1 $^1B_2$    | 7.12                                     | 7.17 | 7.27 | 7.32 | 7.36 | 7.40 | 7.52 |
| Norbornadiene   | 2 $^1B_2$    | 7.43                                     | 7.49 | 7.60 | 7.67 | 7.71 | 7.77 | 7.90 |
| Norbornadiene   | 2 $^1A_2$    | 7.87                                     | 7.93 | 8.03 | 8.09 | 8.12 | 8.17 | 8.29 |
| Benzene         | 2 $^1A'$     | 4.09                                     | 4.43 | 4.70 | 4.82 | 4.94 | 5.15 | 5.35 |
| Benzene         | 3 $^1A'$     | 5.86                                     | 6.13 | 6.35 | 6.45 | 6.54 | 6.72 | 6.88 |
| Benzene         | 4 $^1A'$     | 6.29                                     | 6.61 | 6.88 | 7.01 | 7.13 | 7.35 | 7.56 |
| Benzene         | 5 $^1A'$     | 6.29                                     | 6.62 | 6.90 | 7.03 | 7.15 | 7.38 | 7.59 |
| Benzene         | 6 $^1A'$     | 6.88                                     | 7.45 | 7.82 | 7.97 | 8.11 | 8.36 | 8.58 |
| Benzene         | 7 $^1A'$     | 6.90                                     | 7.47 | 7.85 | 8.00 | 8.14 | 8.39 | 8.61 |
| Benzene         | 1 $^3A'$     | 3.48                                     | 3.74 | 3.95 | 4.05 | 4.14 | 4.32 | 4.48 |
| Benzene         | 2 $^3A'$     | 4.24                                     | 4.50 | 4.71 | 4.81 | 4.90 | 5.07 | 5.23 |
| Benzene         | 3 $^3A'$     | 4.24                                     | 4.50 | 4.72 | 4.82 | 4.91 | 5.09 | 5.25 |
| Benzene         | 4 $^3A'$     | 5.19                                     | 5.42 | 5.62 | 5.72 | 5.81 | 5.97 | 6.13 |
| Naphthalene     | 1 $^1B_{3u}$ | 3.88                                     | 4.05 | 4.19 | 4.26 | 4.32 | 4.44 | 4.56 |
| Naphthalene     | 1 $^1B_{2u}$ | 4.18                                     | 4.36 | 4.51 | 4.58 | 4.65 | 4.78 | 4.90 |

Table S16: ... continued

| VTZP Basis Set |              | Excitation Energy $V^{\text{calc}}$ [eV] |      |      |      |      |      |      |
|----------------|--------------|------------------------------------------|------|------|------|------|------|------|
| Molecule       | State        | 0                                        | 0.10 | 0.20 | 0.25 | 0.30 | 0.40 | 0.50 |
| Naphthalene    | 2 $^1A_g$    | 5.29                                     | 5.58 | 5.79 | 5.88 | 5.97 | 6.15 | 6.31 |
| Naphthalene    | 1 $^1B_{1g}$ | 5.26                                     | 5.59 | 5.81 | 5.91 | 6.00 | 6.17 | 6.33 |
| Naphthalene    | 2 $^1B_{3u}$ | 5.18                                     | 5.54 | 5.82 | 5.92 | 5.98 | 6.26 | 6.46 |
| Naphthalene    | 2 $^1B_{2u}$ | 5.69                                     | 5.89 | 6.09 | 6.17 | 6.26 | 6.41 | 6.55 |
| Naphthalene    | 3 $^1A_g$    | 5.95                                     | 6.29 | 6.53 | 6.64 | 6.74 | 6.93 | 7.10 |
| Naphthalene    | 3 $^1B_{2u}$ | 7.27                                     |      | 7.24 | 8.01 | 8.13 | 8.34 | 8.53 |
| Furan          | 1 $^1B_2$    | 5.99                                     | 6.21 | 6.39 | 6.47 | 6.54 | 6.68 | 6.82 |
| Furan          | 3 $^1A_1$    | 6.97                                     | 7.50 | 7.87 | 8.03 | 8.17 | 8.44 | 8.67 |
| Furan          | 1 $^3B_2$    | 4.16                                     | 4.23 | 4.31 | 4.35 | 4.38 | 4.45 | 4.51 |
| Furan          | 1 $^3A_1$    | 5.35                                     | 5.49 | 5.61 | 5.67 | 5.72 | 5.82 | 5.92 |
| Pyrrole        | 1 $^1B_2$    | 5.88                                     | 6.15 | 6.37 | 6.46 | 6.55 | 6.72 | 6.86 |
| Pyrrole        | 3 $^1A_1$    | 7.28                                     | 7.66 | 7.94 | 8.06 | 8.18 | 8.40 | 8.60 |
| Pyrrole        | 1 $^3B_2$    | 4.36                                     | 4.45 | 4.53 | 4.58 | 4.62 | 4.69 | 4.77 |
| Pyrrole        | 1 $^3A_1$    | 5.19                                     | 5.36 | 5.51 | 5.58 | 5.64 | 5.77 | 5.88 |
| Imidazole      | 2 $^1A'$     | 5.32                                     | 5.70 | 5.97 | 6.10 | 6.17 | 6.36 | 6.52 |
| Imidazole      | 3 $^1A'$     | 6.40                                     | 6.57 | 6.77 | 6.86 | 6.94 | 7.09 | 7.23 |
| Pyridine       | 2 $^1A_1$    | 5.40                                     |      | 6.09 | 6.22 | 6.33 | 6.53 | 6.72 |
| Pyridine       | 3 $^1A_1$    | 6.48                                     |      | 7.17 | 7.30 | 7.43 | 7.66 | 7.86 |
| Pyridine       | 1 $^1B_1$    | 4.88                                     |      | 5.08 | 5.13 | 5.50 | 5.59 | 5.67 |
| Pyridine       | 1 $^1A_2$    | 5.18                                     |      | 5.40 | 5.45 | 5.15 | 5.23 | 5.30 |
| Pyridine       | 1 $^3A_1$    | 4.00                                     |      | 4.27 | 4.33 | 4.38 | 4.49 | 4.58 |
| Pyridine       | 1 $^3B_2$    | 3.99                                     |      | 4.52 | 4.60 | 4.68 | 4.83 | 4.96 |
| Pyrazine       | 1 $^1B_{2u}$ | 4.38                                     | 4.59 | 4.76 | 4.83 | 4.90 | 5.04 | 5.16 |
| Pyrazine       | 1 $^1B_{1u}$ | 6.22                                     | 6.42 | 6.60 | 6.68 | 6.76 | 6.91 | 7.05 |
| Pyrazine       | 2 $^1B_{1u}$ | 6.92                                     | 7.24 | 7.50 | 7.62 | 7.73 | 7.93 | 8.12 |
| Pyrazine       | 2 $^1B_{2u}$ | 6.89                                     | 7.18 | 7.43 | 7.55 | 7.66 | 7.87 | 8.05 |
| Pyrazine       | 1 $^1B_{3u}$ | 3.68                                     | 3.83 | 3.97 | 4.03 | 4.09 | 4.21 | 4.32 |
| Pyrazine       | 1 $^1B_{2g}$ | 5.26                                     | 5.42 | 5.55 | 5.61 | 5.67 | 5.78 | 5.89 |
| Pyrazine       | 1 $^1B_{1g}$ | 5.44                                     | 5.97 | 6.20 | 6.31 | 6.41 | 6.59 | 6.76 |
| Pyrimidine     | 1 $^1B_2$    | 0.00                                     | 5.10 | 5.26 | 5.33 | 5.40 | 5.54 | 5.66 |
| Pyrimidine     | 2 $^1A_1$    | 0.00                                     | 6.18 | 6.37 | 6.46 | 6.54 | 6.70 | 6.84 |
| Pyrimidine     | 3 $^1A_1$    | 0.00                                     | 6.62 | 6.91 | 7.03 | 7.15 | 7.37 | 7.57 |
| Pyrimidine     | 2 $^1B_2$    | 0.00                                     | 6.92 | 7.25 | 7.40 | 7.54 | 7.80 | 8.03 |
| Pyrimidine     | 1 $^1B_1$    | 0.00                                     | 4.26 | 4.38 | 4.44 | 4.49 | 4.59 | 4.69 |
| Pyrimidine     | 1 $^1A_2$    | 0.00                                     | 4.59 | 4.72 | 4.78 | 4.85 | 4.96 | 5.07 |
| Pyridazine     | 2 $^1A_1$    | 4.79                                     | 4.96 | 5.11 | 5.18 | 5.24 | 5.37 | 5.48 |
| Pyridazine     | 1 $^1B_2$    | 5.44                                     | 5.80 | 6.04 | 6.14 | 6.25 | 6.43 | 6.60 |
| Pyridazine     | 2 $^1B_2$    | 6.38                                     | 6.79 | 7.09 | 7.22 | 7.34 | 7.57 | 7.77 |

Table S16: ... continued

| VTZP Basis Set |              | Excitation Energy $V^{\text{calc}}$ [eV] |      |      |      |      |      |      |
|----------------|--------------|------------------------------------------|------|------|------|------|------|------|
| Molecule       | State        | 0                                        | 0.10 | 0.20 | 0.25 | 0.30 | 0.40 | 0.50 |
| Pyridazine     | 3 $^1A_1$    | 6.64                                     | 7.03 | 7.33 | 7.46 | 7.59 | 7.81 | 8.02 |
| Pyridazine     | 1 $^1B_1$    | 3.43                                     | 3.59 | 3.71 | 3.77 | 3.83 | 3.94 | 4.05 |
| Pyridazine     | 2 $^1A_2$    | 5.38                                     | 5.56 | 5.72 | 5.80 | 5.87 | 6.00 | 6.13 |
| Pyridazine     | 2 $^1B_1$    | 6.02                                     | 6.26 | 6.44 | 6.52 | 6.60 | 6.75 | 6.88 |
| Triazine       | 2 $^1A'$     | 5.45                                     | 5.60 | 5.73 | 5.79 | 5.85 | 5.97 | 6.08 |
| Triazine       | 3 $^1A'$     | 6.45                                     | 6.81 | 7.02 | 7.11 | 7.19 | 7.35 | 7.50 |
| Triazine       | 4 $^1A'$     | 6.48                                     | 6.89 | 7.19 | 7.33 | 7.46 | 7.69 | 7.91 |
| Triazine       | 2 $^1A''$    | 4.11                                     | 4.45 | 4.65 | 4.74 | 4.80 | 4.99 | 5.14 |
| Triazine       | 3 $^1A''$    | 4.25                                     | 4.47 | 4.68 | 4.77 | 4.85 | 5.03 | 5.19 |
| Triazine       | 4 $^1A''$    | 4.32                                     | 4.49 | 4.69 | 4.78 | 4.86 | 5.04 | 5.19 |
| Tetrazine      | 1 $^1B_{2u}$ | 4.43                                     | 4.64 | 4.81 | 4.89 | 4.96 | 5.09 | 5.22 |
| Tetrazine      | 1 $^1B_{1u}$ | 6.06                                     | 6.35 | 6.59 | 6.70 | 6.80 | 6.99 | 7.16 |
| Tetrazine      | 2 $^1B_{1u}$ | 6.61                                     | 6.89 | 7.12 | 7.23 | 7.33 | 7.53 | 7.71 |
| Tetrazine      | 2 $^1B_{2u}$ | 7.02                                     | 7.43 | 7.69 | 7.81 | 7.92 | 8.12 | 8.31 |
| Tetrazine      | 1 $^1B_{3u}$ | 1.85                                     | 2.01 | 2.14 | 2.20 | 2.26 | 2.38 | 2.48 |
| Tetrazine      | 1 $^1A_u$    | 2.94                                     | 3.18 | 3.36 | 3.44 | 3.52 | 3.67 | 3.80 |
| Tetrazine      | 2 $^1B_{2g}$ | 5.35                                     | 5.07 | 5.87 | 5.98 | 6.09 | 6.28 | 6.47 |
| Tetrazine      | 2 $^1B_{1g}$ | 5.65                                     | 5.96 | 6.23 | 6.36 | 6.47 | 6.69 | 6.89 |
| Tetrazine      | 2 $^1B_{3u}$ | 6.09                                     | 6.37 | 6.59 | 6.70 | 6.80 | 6.98 | 7.15 |
| Tetrazine      | 1 $^3B_{3u}$ | 1.18                                     | 1.35 | 1.49 | 1.56 | 1.63 | 1.75 | 1.86 |
| Tetrazine      | 1 $^3A_u$    | 2.69                                     | 2.94 | 3.14 | 3.23 | 3.32 | 3.48 | 3.63 |
| Tetrazine      | 1 $^3B_{1g}$ | 3.64                                     | 3.86 | 4.02 | 4.10 | 4.17 | 4.31 | 4.43 |
| Formaldehyde   | 1 $^1A_2$    | 4.09                                     | 4.11 | 4.13 | 4.14 | 4.15 | 3.86 | 4.19 |
| Formaldehyde   | 1 $^3A_2$    | 3.65                                     | 3.69 | 3.73 | 3.75 | 3.77 | 3.49 | 3.83 |
| Formaldehyde   | 1 $^3A_1$    | 6.03                                     | 6.03 | 6.04 | 6.04 | 6.05 | 5.75 | 6.07 |
| Acetone        | 1 $^1A_2$    | 4.50                                     | 4.59 | 4.66 | 4.69 | 4.73 | 4.79 | 4.85 |
| Acetone        | 1 $^3A_2$    | 4.15                                     | 4.25 | 4.34 | 4.38 | 4.42 | 4.50 | 4.56 |
| Acetone        | 1 $^3A_1$    | 6.17                                     | 6.24 | 6.30 | 6.32 | 6.35 | 6.40 | 6.45 |
| Benzoquinone   | 1 $^1B_{1g}$ | 2.29                                     | 2.47 | 2.63 | 2.70 | 2.77 | 2.90 | 3.02 |
| Benzoquinone   | 1 $^1A_u$    | 2.32                                     | 2.50 | 2.65 | 2.72 | 2.78 | 2.91 | 3.03 |
| Benzoquinone   | 1 $^1B_{3g}$ | 3.50                                     | 3.76 | 3.94 | 4.02 | 4.10 | 4.24 | 4.36 |
| Benzoquinone   | 1 $^1B_{1u}$ | 4.48                                     | 4.69 | 4.86 | 4.95 | 5.02 | 5.16 | 5.29 |
| Benzoquinone   | 2 $^1B_{1u}$ | 5.85                                     | 6.25 | 6.60 | 6.76 | 6.15 | 6.35 | 6.52 |
| Benzoquinone   | 1 $^3B_{1g}$ | 2.12                                     | 2.33 | 2.50 | 2.58 | 2.65 | 2.79 | 2.92 |
| Benzoquinone   | 1 $^3A_u$    | 2.20                                     | 2.38 | 2.55 | 2.62 | 2.69 | 2.82 | 2.94 |
| Formamide      | 1 $^1A''$    | 5.60                                     | 5.64 | 5.68 | 5.69 | 5.71 | 5.75 | 5.78 |
| Formamide      | 2 $^1A'$     | 6.58                                     | 6.85 | 7.03 | 7.11 | 7.18 | 7.32 | 7.44 |
| Formamide      | 1 $^3A''$    | 5.34                                     | 5.40 | 5.45 | 5.47 | 5.49 | 5.53 | 5.57 |

Table S16: ... continued

| VTZP Basis Set |           | Excitation Energy $V^{\text{calc}}$ [eV] |      |      |      |      |       |       |
|----------------|-----------|------------------------------------------|------|------|------|------|-------|-------|
| Molecule       | State     | 0                                        | 0.10 | 0.20 | 0.25 | 0.30 | 0.40  | 0.50  |
| Acetamide      | 1 $^1A''$ | 5.64                                     | 5.67 | 5.71 | 5.73 | 5.75 | 5.80  | 5.84  |
| Acetamide      | 2 $^1A'$  |                                          | 6.48 | 6.77 | 6.86 | 6.95 | 7.11  | 7.24  |
| Acetamide      | 3 $^1A'$  | 9.22                                     | 9.18 | 9.55 | 9.66 | 9.76 | 9.93  | 10.09 |
| Propanamide    | 1 $^1A''$ | 5.58                                     | 5.66 | 5.74 | 5.77 | 5.81 | 5.88  | 5.95  |
| Propanamide    | 2 $^1A'$  | 7.27                                     | 7.45 | 7.61 | 7.68 | 7.75 | 7.87  | 7.99  |
| Propanamide    | 3 $^1A'$  | 9.42                                     | 9.59 | 9.75 | 9.82 | 9.88 | 10.00 | 10.12 |
| Cytosine       | 2 $^1A'$  | 4.25                                     | 4.41 | 4.55 | 4.61 | 4.67 | 4.79  | 4.90  |
| Cytosine       | 1 $^1A''$ | 4.95                                     | 5.11 | 5.25 | 5.31 | 5.37 | 5.49  | 5.61  |
| Cytosine       | 3 $^1A'$  | 4.87                                     | 5.14 | 5.35 | 5.44 | 5.53 | 5.70  | 5.86  |
| Cytosine       | 4 $^1A'$  | 5.36                                     | 5.73 | 6.03 | 6.15 | 6.27 | 6.48  | 6.67  |
| Cytosine       | 5 $^1A'$  | 6.15                                     | 6.47 | 6.73 | 6.84 | 6.95 | 7.15  | 7.33  |
| Thymine        | 1 $^1A''$ | 4.89                                     | 5.01 | 5.11 | 5.15 | 5.19 | 5.28  | 5.36  |
| Thymine        | 2 $^1A'$  | 4.39                                     | 4.61 | 4.78 | 4.89 | 4.98 | 5.08  | 5.23  |
| Thymine        | 3 $^1A'$  | 5.48                                     | 5.52 | 5.74 | 6.04 | 6.11 | 6.21  | 6.38  |
| Thymine        | 4 $^1A'$  |                                          | 5.72 | 5.94 | 6.17 |      |       |       |
| Thymine        | 5 $^1A'$  |                                          | 6.43 | 6.74 | 6.79 |      |       |       |
| Uracil         | 1 $^1A''$ | 4.78                                     | 4.98 | 5.08 | 5.13 | 5.18 | 5.26  | 5.35  |
| Uracil         | 2 $^1A'$  | 4.60                                     | 4.82 | 4.99 | 5.07 | 5.14 | 5.29  | 5.42  |
| Uracil         | 3 $^1A'$  | 5.53                                     | 5.76 | 5.94 | 6.02 | 6.10 | 6.24  | 6.38  |
| Uracil         | 4 $^1A'$  | 5.88                                     | 6.18 | 6.40 | 6.50 | 6.60 | 6.78  | 6.94  |
| Uracil         | 5 $^1A'$  | 6.48                                     | 6.83 | 7.08 | 7.20 | 7.30 | 7.50  | 7.68  |
| Adenine        | 2 $^1A'$  | 4.56                                     | 4.85 | 5.03 | 5.11 | 5.19 | 5.34  | 5.48  |
| Adenine        | 3 $^1A'$  | 4.68                                     | 4.93 | 5.13 | 5.22 | 5.30 | 5.45  | 5.60  |
| Adenine        | 1 $^1A''$ | 4.46                                     | 4.93 | 5.17 | 5.24 | 5.30 | 5.43  | 5.54  |
| Adenine        | 4 $^1A'$  | 5.30                                     | 5.76 | 6.06 | 6.19 | 6.31 | 6.53  | 6.73  |
| Adenine        | 5 $^1A'$  | 5.87                                     | 6.26 | 6.51 | 6.62 | 6.71 | 6.89  | 7.06  |
| Adenine        | 6 $^1A'$  |                                          | 6.37 | 6.66 | 6.79 | 6.90 | 7.10  | 7.29  |
| Adenine        | 7 $^1A'$  |                                          | 6.99 | 7.33 | 7.45 | 7.57 | 7.79  | 7.99  |

Table S17: CASPT2 vertical excitation energies and approximate dynamical correlation energies  $\tilde{E}^{\text{dyn}}$  for the Thiel benchmark set obtained using the ANO-RCC-VQZP basis set and different IPEA shift parameters ( $\varepsilon = 0, 0.10, 0.20, 0.25, 0.30, 0.40,$  and  $0.50$  a.u.).

| VQZP Basis Set |              | Excitation Energy $V^{\text{calc}}$ [eV] |      |      |      |      |      |      |
|----------------|--------------|------------------------------------------|------|------|------|------|------|------|
| Molecule       | State        | 0                                        | 0.10 | 0.20 | 0.25 | 0.30 | 0.40 | 0.50 |
| Ethene         | 1 $^1B_{1u}$ | 8.09                                     | 8.18 | 8.26 | 8.30 | 8.34 | 8.40 | 8.47 |
| Ethene         | 1 $^3B_{1u}$ | 4.36                                     | 4.41 | 4.46 | 4.48 | 4.50 | 4.53 | 4.57 |
| Butadiene      | 1 $^1B_u$    | 5.79                                     | 5.97 | 6.13 | 6.20 | 6.27 | 6.40 | 6.52 |

Table S17: ... continued

| VQZP Basis Set  |              | Excitation Energy $V^{\text{calc}}$ [eV] |      |      |      |      |      |      |
|-----------------|--------------|------------------------------------------|------|------|------|------|------|------|
| Molecule        | State        | 0                                        | 0.10 | 0.20 | 0.25 | 0.30 | 0.40 | 0.50 |
| Butadiene       | 1 $^3B_u$    | 3.21                                     | 3.30 | 3.39 | 3.44 | 3.48 | 3.55 | 3.62 |
| Butadiene       | 1 $^3A_g$    | 4.95                                     | 5.07 | 5.19 | 5.24 | 5.29 | 5.39 | 5.47 |
| Hexatriene      | 1 $^1B_u$    | 4.60                                     | 4.75 | 5.02 | 4.77 | 4.97 | 5.31 | 5.40 |
| Hexatriene      | 2 $^1A_g$    | 4.87                                     | 5.17 | 5.32 | 5.39 | 5.45 | 5.57 | 5.68 |
| Hexatriene      | 1 $^3B_u$    | 2.48                                     | 2.61 | 2.70 | 2.74 | 2.78 | 2.86 | 2.93 |
| Hexatriene      | 1 $^3A_g$    | 4.00                                     | 4.16 | 4.29 | 4.35 | 4.41 | 4.51 | 4.61 |
| Octatetraene    | 2 $^1A_g$    | 4.26                                     | 4.43 | 4.56 | 4.62 | 4.68 | 4.80 | 4.90 |
| Octatetraene    | 1 $^1B_u$    | 4.07                                     | 4.27 | 4.42 | 4.50 | 4.56 | 4.69 | 4.80 |
| Octatetraene    | 2 $^1B_u$    | 5.13                                     | 5.43 | 5.63 | 5.72 | 5.81 | 5.97 | 6.11 |
| Octatetraene    | 1 $^3B_u$    | 2.11                                     | 2.25 | 2.34 | 2.38 | 2.42 | 2.50 | 2.57 |
| Octatetraene    | 1 $^3A_g$    | 3.40                                     | 3.58 | 3.70 | 3.76 | 3.82 | 3.92 | 4.01 |
| Cyclopropene    | 1 $^1B_1$    | 6.29                                     | 6.40 | 6.49 | 6.54 | 6.58 | 6.66 | 6.74 |
| Cyclopropene    | 1 $^1B_2$    | 6.53                                     | 6.66 | 6.78 | 6.84 | 6.89 | 7.00 | 7.09 |
| Cyclopropene    | 1 $^3B_2$    | 4.13                                     | 4.20 | 4.25 | 4.28 | 4.31 | 4.36 | 4.40 |
| Cyclopropene    | 1 $^3B_1$    | 6.01                                     | 6.13 | 6.24 | 6.29 | 6.33 | 6.42 | 6.50 |
| Cyclopentadiene | 1 $^1B_2$    | 5.06                                     |      | 5.34 | 5.41 | 5.47 | 5.59 | 5.71 |
| Cyclopentadiene | 2 $^1A_1$    | 5.53                                     |      | 6.08 | 6.17 | 6.27 | 6.43 | 6.58 |
| Cyclopentadiene | 3 $^1A_1$    | 7.24                                     |      | 7.97 | 8.11 | 8.25 | 8.49 | 8.71 |
| Cyclopentadiene | 1 $^3B_2$    | 3.27                                     |      | 3.43 | 3.48 | 3.52 | 3.59 | 3.66 |
| Norbornadiene   | 1 $^1A_2$    | 6.07                                     | 6.10 | 6.20 | 6.20 | 6.27 | 6.35 | 6.42 |
| Norbornadiene   | 1 $^1B_2$    | 7.15                                     | 7.18 | 7.27 | 7.27 | 7.34 | 7.41 | 7.49 |
| Norbornadiene   | 2 $^1B_2$    | 7.44                                     | 7.48 | 7.59 | 7.60 | 7.68 | 7.76 | 7.85 |
| Norbornadiene   | 2 $^1A_2$    | 7.90                                     | 7.94 | 8.04 | 8.04 | 8.12 | 8.19 | 8.27 |
| Norbornadiene   | 1 $^3A_2$    | 3.74                                     | 3.81 | 3.93 | 3.94 | 4.02 | 4.11 | 4.19 |
| Norbornadiene   | 1 $^3B_2$    | 4.23                                     | 4.30 | 4.42 | 4.68 | 4.52 | 4.61 | 4.71 |
| Benzene         | 2 $^1A'$     | 4.07                                     | 4.41 | 4.68 | 4.80 | 4.92 | 5.14 | 5.33 |
| Benzene         | 3 $^1A'$     | 5.78                                     | 6.05 | 6.27 | 6.37 | 6.47 | 6.65 | 6.81 |
| Benzene         | 4 $^1A'$     | 6.17                                     | 6.50 | 6.78 | 6.91 | 7.03 | 7.26 | 7.47 |
| Benzene         | 5 $^1A'$     | 6.17                                     | 6.51 | 6.79 | 6.92 | 7.05 | 7.28 | 7.50 |
| Benzene         | 6 $^1A'$     | 6.75                                     | 7.39 | 7.78 | 7.94 | 8.09 | 8.34 | 8.57 |
| Benzene         | 7 $^1A'$     | 6.76                                     | 7.42 | 7.81 | 7.97 | 8.11 | 8.37 | 8.59 |
| Benzene         | 1 $^3A'$     | 3.47                                     | 3.73 | 3.95 | 4.04 | 4.14 | 4.31 | 4.48 |
| Benzene         | 2 $^3A'$     | 4.22                                     | 4.48 | 4.70 | 4.79 | 4.89 | 5.06 | 5.22 |
| Benzene         | 3 $^3A'$     | 4.22                                     | 4.49 | 4.71 | 4.81 | 4.90 | 5.08 | 5.24 |
| Benzene         | 4 $^3A'$     | 5.13                                     | 5.37 | 5.58 | 5.67 | 5.76 | 5.93 | 6.09 |
| Naphthalene     | 1 $^1B_{3u}$ | 3.85                                     | 4.03 | 4.17 | 4.24 | 4.31 | 4.43 | 4.54 |
| Naphthalene     | 1 $^1B_{2u}$ | 4.12                                     | 4.29 | 4.46 | 4.53 | 4.60 |      | 4.85 |
| Naphthalene     | 2 $^1A_g$    | 4.23                                     | 5.28 | 5.61 | 5.74 | 5.85 | 6.06 | 6.24 |

Table S17: ... continued

| VQZP Basis Set |              | Excitation Energy $V^{\text{calc}}$ [eV] |      |      |      |      |      |      |
|----------------|--------------|------------------------------------------|------|------|------|------|------|------|
| Molecule       | State        | 0                                        | 0.10 | 0.20 | 0.25 | 0.30 | 0.40 | 0.50 |
| Naphthalene    | 1 $^1B_{1g}$ | 5.07                                     | 5.46 | 5.70 | 5.80 | 5.90 | 6.08 | 6.25 |
| Naphthalene    | 2 $^1B_{3u}$ | 5.01                                     | 5.39 | 5.72 | 5.85 | 5.98 | 6.18 | 6.39 |
| Naphthalene    | 2 $^1B_{2u}$ | 5.64                                     | 5.81 | 6.00 | 6.09 | 6.18 | 6.33 |      |
| Naphthalene    | 3 $^1A_g$    | 5.24                                     | 6.06 | 6.39 | 6.52 | 5.58 | 5.73 | 5.86 |
| Furan          | 1 $^1B_2$    | 5.69                                     | 5.99 | 6.12 | 6.23 | 6.37 | 6.53 | 6.67 |
| Furan          | 3 $^1A_1$    |                                          | 7.06 | 7.56 | 7.75 | 7.92 | 8.23 | 8.49 |
| Furan          | 1 $^3B_2$    | 4.08                                     | 4.20 | 4.32 | 4.34 | 4.38 | 4.44 | 4.51 |
| Furan          | 1 $^3A_1$    | 5.26                                     | 5.44 | 5.61 | 5.66 | 5.72 | 5.82 | 5.92 |
| Pyrrrole       | 1 $^1B_2$    | 5.42                                     | 5.85 | 6.06 | 6.22 | 6.33 | 6.52 | 6.70 |
| Pyrrrole       | 3 $^1A_1$    | 6.83                                     | 7.34 | 7.70 | 7.85 | 7.98 | 8.23 | 8.45 |
| Pyrrrole       | 1 $^3B_2$    | 4.33                                     | 4.43 | 4.52 | 4.56 | 4.60 | 4.68 | 4.75 |
| Pyrrrole       | 1 $^3A_1$    | 5.15                                     | 5.33 | 5.48 | 5.55 | 5.62 | 5.75 | 5.86 |
| Pyridine       | 2 $^1A_1$    |                                          | 5.76 | 6.04 | 6.23 | 6.24 | 6.46 | 6.65 |
| Pyridine       | 3 $^1A_1$    |                                          | 6.72 | 7.03 | 6.79 | 7.30 | 7.54 | 7.76 |
| Pyridine       | 1 $^1B_1$    |                                          | 4.97 | 5.07 | 5.11 | 5.49 | 5.59 | 5.67 |
| Pyridine       | 1 $^1A_2$    |                                          | 5.29 | 5.40 | 5.45 | 5.14 | 5.22 | 5.30 |
| Pyridine       | 1 $^3A_1$    |                                          | 4.15 | 4.27 | 4.33 | 4.39 | 4.49 | 4.59 |
| Pyridine       | 1 $^3B_2$    |                                          | 4.40 | 4.51 | 4.56 |      | 4.80 | 4.93 |
| Pyrazine       | 1 $^1B_{2u}$ | 4.16                                     | 4.54 | 4.68 | 4.77 | 4.84 | 4.98 | 5.11 |
| Pyrazine       | 1 $^1B_{1u}$ | 6.15                                     | 6.41 | 6.54 | 6.62 | 6.70 | 6.86 | 6.99 |
| Pyrazine       | 2 $^1B_{1u}$ | 6.79                                     | 7.16 | 7.38 | 7.50 | 7.61 | 7.82 | 8.02 |
| Pyrazine       | 2 $^1B_{2u}$ | 6.75                                     | 7.11 | 7.34 | 7.46 | 7.58 | 7.79 | 7.99 |
| Pyrazine       | 1 $^1B_{3u}$ | 3.63                                     | 3.84 | 3.94 | 4.00 | 4.06 | 4.18 | 4.29 |
| Pyrazine       | 1 $^1B_{2g}$ | 5.22                                     | 5.43 | 5.52 | 5.58 | 5.64 | 5.75 | 5.86 |
| Pyrazine       | 1 $^1B_{1g}$ | 5.61                                     | 5.98 | 6.17 | 6.28 | 6.38 | 6.57 | 6.74 |
| Pyrimidine     | 1 $^1B_2$    | 4.87                                     | 5.05 | 5.20 | 5.27 | 5.34 | 5.47 | 5.59 |
| Pyrimidine     | 2 $^1A_1$    | 5.69                                     | 6.10 | 6.30 | 6.39 | 6.48 | 6.63 | 6.78 |
| Pyrimidine     | 3 $^1A_1$    | 5.97                                     | 6.42 | 6.74 | 6.88 | 7.02 | 7.25 | 7.47 |
| Pyrimidine     | 2 $^1B_2$    | 6.75                                     | 7.07 | 7.35 | 7.47 | 7.59 | 7.81 | 8.01 |
| Pyrimidine     | 1 $^1B_1$    | 4.11                                     | 4.25 | 4.37 | 4.42 | 4.48 | 4.58 | 4.68 |
| Pyrimidine     | 1 $^1A_2$    | 4.43                                     | 4.58 | 4.71 | 4.78 | 4.84 | 4.95 | 5.06 |
| Pyridazine     | 2 $^1A_1$    | 4.75                                     | 4.93 | 5.08 | 5.15 | 5.22 | 5.35 | 5.47 |
| Pyridazine     | 1 $^1B_2$    | 5.34                                     | 5.68 | 5.95 | 6.06 | 6.16 | 6.35 | 6.52 |
| Pyridazine     | 2 $^1B_2$    | 6.26                                     | 6.64 | 6.99 | 7.13 | 7.26 | 7.49 | 7.70 |
| Pyridazine     | 3 $^1A_1$    | 6.64                                     | 6.91 | 7.03 | 7.36 | 7.49 | 7.73 | 7.94 |
| Pyridazine     | 1 $^1B_1$    | 3.41                                     | 3.56 | 3.70 | 3.76 | 3.82 | 3.93 | 4.03 |
| Pyridazine     | 2 $^1A_2$    | 5.35                                     | 5.54 | 5.71 | 5.78 | 5.85 | 5.99 | 6.12 |
| Pyridazine     | 2 $^1B_1$    | 5.95                                     | 6.24 | 6.42 | 6.51 | 6.59 | 6.74 | 6.88 |

Table S17: ... continued

| VQZP Basis Set |              | Excitation Energy $V^{\text{calc}}$ [eV] |      |      |      |      |       |       |
|----------------|--------------|------------------------------------------|------|------|------|------|-------|-------|
| Molecule       | State        | 0                                        | 0.10 | 0.20 | 0.25 | 0.30 | 0.40  | 0.50  |
| Triazine       | 2 $^1A'$     | 5.72                                     | 5.79 | 5.86 | 5.91 | 5.96 | 6.06  | 6.16  |
| Triazine       | 3 $^1A'$     |                                          | 6.96 | 7.12 |      |      |       |       |
| Triazine       | 2 $^1A''$    |                                          | 4.63 | 4.77 | 4.85 | 4.92 | 5.07  | 5.22  |
| Triazine       | 3 $^1A''$    |                                          | 4.64 | 4.80 | 4.88 | 4.96 | 5.12  | 5.27  |
| Triazine       | 4 $^1A''$    |                                          | 4.68 | 4.82 | 4.90 | 4.98 | 5.13  | 5.28  |
| Tetrazine      | 1 $^1B_{2u}$ | 4.37                                     | 4.60 | 4.77 | 4.85 | 4.93 | 5.06  | 5.19  |
| Tetrazine      | 1 $^1B_{1u}$ | 5.98                                     | 6.28 | 6.52 | 6.63 | 6.73 | 6.93  | 7.10  |
| Tetrazine      | 2 $^1B_{1u}$ | 6.55                                     | 6.83 | 7.06 | 7.17 | 7.27 | 7.47  | 7.65  |
| Tetrazine      | 2 $^1B_{2u}$ | 6.98                                     | 7.36 | 7.63 | 7.75 | 7.86 | 8.07  | 8.26  |
| Tetrazine      | 1 $^1B_{3u}$ | 1.82                                     | 1.99 | 2.12 | 2.18 | 2.24 | 2.36  | 2.46  |
| Tetrazine      | 1 $^1A_u$    | 2.91                                     | 3.16 | 3.34 | 3.43 | 3.51 | 3.65  | 3.79  |
| Tetrazine      | 2 $^1B_{2g}$ | 5.31                                     | 5.61 | 5.85 | 5.96 | 6.07 | 6.27  | 6.45  |
| Tetrazine      | 2 $^1B_{1g}$ | 5.58                                     | 5.91 | 6.19 | 6.31 | 6.43 | 6.66  | 6.86  |
| Tetrazine      | 2 $^1B_{3u}$ | 6.05                                     | 6.26 | 6.57 | 6.68 | 6.78 | 6.96  | 7.14  |
| Tetrazine      | 1 $^3B_{3u}$ | 1.16                                     | 1.34 | 1.48 | 1.55 | 1.61 | 1.74  | 1.85  |
| Tetrazine      | 1 $^3A_u$    | 2.68                                     | 2.94 | 3.14 | 3.23 | 3.31 | 3.48  | 3.63  |
| Tetrazine      | 1 $^3B_{1g}$ | 3.62                                     | 3.84 | 4.00 | 4.08 | 4.15 | 4.29  | 4.42  |
| Formaldehyde   | 1 $^1A_2$    | 4.13                                     | 4.14 | 4.16 | 4.17 | 3.20 | 3.22  | 3.24  |
| Formaldehyde   | 1 $^3A_2$    | 3.69                                     | 3.73 | 3.77 | 3.79 | 2.83 | 2.86  | 2.90  |
| Formaldehyde   | 1 $^3A_1$    | 6.08                                     | 6.08 | 6.09 | 6.09 | 5.12 | 5.13  | 5.14  |
| Acetone        | 1 $^1A_2$    | 4.53                                     | 4.62 | 4.70 | 4.73 | 4.76 | 4.83  | 4.89  |
| Acetone        | 1 $^3A_2$    | 4.18                                     | 4.29 | 4.38 | 4.42 | 4.46 | 4.54  | 4.61  |
| Acetone        | 1 $^3A_1$    | 6.21                                     | 6.28 | 6.34 | 6.37 | 6.40 | 6.45  | 6.50  |
| Benzoquinone   | 1 $^1B_{1g}$ | 2.29                                     | 2.47 | 2.63 | 2.71 | 2.78 | 2.91  | 3.03  |
| Benzoquinone   | 1 $^1A_u$    | 2.34                                     | 2.50 | 2.65 | 2.72 | 2.79 | 2.91  | 3.04  |
| Benzoquinone   | 1 $^1B_{3g}$ | 3.46                                     | 3.72 | 3.91 | 3.99 | 4.07 | 4.21  | 4.33  |
| Benzoquinone   | 1 $^1B_{1u}$ | 4.58                                     | 4.81 | 4.97 | 5.05 | 5.13 | 5.27  | 5.40  |
| Benzoquinone   | 1 $^3B_{1g}$ | 2.13                                     | 2.34 | 2.51 | 2.59 | 2.66 | 2.80  | 2.93  |
| Benzoquinone   | 1 $^3A_u$    | 2.21                                     | 2.39 | 2.55 | 2.63 | 2.70 | 2.83  | 2.95  |
| Formamide      | 1 $^1A''$    | 5.59                                     | 5.63 | 5.67 | 5.69 | 5.70 | 5.74  | 5.78  |
| Formamide      | 2 $^1A'$     | 6.49                                     | 6.77 | 6.96 | 7.04 | 7.12 | 7.26  | 7.39  |
| Formamide      | 1 $^3A''$    | 5.33                                     | 5.39 | 5.44 | 5.46 | 5.49 | 5.53  | 5.56  |
| Acetamide      | 1 $^1A''$    | 5.61                                     |      | 5.71 | 5.73 | 5.75 | 5.80  | 5.84  |
| Acetamide      | 2 $^1A'$     | 7.23                                     |      | 6.70 | 6.80 | 6.90 | 7.06  | 7.20  |
| Acetamide      | 3 $^1A'$     | 9.01                                     |      | 9.50 | 9.62 | 9.72 | 9.90  | 10.06 |
| Propanamide    | 1 $^1A''$    | 5.60                                     | 5.68 | 5.76 | 5.80 | 5.84 | 5.91  | 5.98  |
| Propanamide    | 2 $^1A'$     | 7.36                                     | 7.53 | 7.68 | 7.75 | 7.82 | 7.94  | 8.06  |
| Propanamide    | 3 $^1A'$     | 9.50                                     | 9.67 | 9.82 | 9.89 | 9.95 | 10.07 | 10.18 |

Table S17: ... continued

| VQZP Basis Set |           | Excitation Energy $V^{\text{calc}}$ [eV] |      |      |      |      |      |      |
|----------------|-----------|------------------------------------------|------|------|------|------|------|------|
| Molecule       | State     | 0                                        | 0.10 | 0.20 | 0.25 | 0.30 | 0.40 | 0.50 |
| Cytosine       | 2 $^1A'$  | 4.36                                     |      | 4.51 | 4.58 | 4.65 | 4.76 | 4.88 |
| Cytosine       | 1 $^1A''$ | 4.94                                     |      | 5.24 | 5.39 | 5.37 | 5.49 | 5.61 |
| Cytosine       | 3 $^1A'$  | 4.84                                     |      | 5.27 | 5.38 | 5.47 | 5.65 | 5.81 |
| Cytosine       | 4 $^1A'$  | 5.51                                     |      | 5.77 | 5.94 | 6.08 | 6.29 | 6.54 |
| Cytosine       | 5 $^1A'$  | 6.01                                     |      | 6.56 | 6.69 | 6.81 | 7.02 | 7.23 |
| Thymine        | 1 $^1A''$ | 4.89                                     | 5.01 | 5.11 | 5.16 | 5.20 | 5.29 | 5.37 |
| Thymine        | 2 $^1A'$  | 4.19                                     | 4.58 | 4.79 | 4.91 | 4.86 | 5.04 | 5.19 |
| Thymine        | 3 $^1A'$  | 5.26                                     | 5.33 | 5.87 | 5.99 | 5.97 | 6.19 | 6.36 |
| Thymine        | 4 $^1A'$  | 5.38                                     | 5.87 | 6.19 | 6.28 | 6.27 | 6.45 | 6.66 |
| Thymine        | 5 $^1A'$  | 6.20                                     |      | 6.97 | 7.08 | 7.09 | 7.25 | 7.61 |
| Uracil         | 1 $^1A''$ | 4.84                                     | 4.98 | 5.08 | 5.14 | 5.18 | 5.27 | 5.36 |
| Uracil         | 2 $^1A'$  | 4.55                                     | 4.77 | 4.95 | 5.03 | 5.11 | 5.26 | 5.40 |
| Uracil         | 3 $^1A'$  | 5.46                                     | 5.72 | 5.91 | 6.00 | 6.08 | 6.23 | 6.37 |
| Uracil         | 4 $^1A'$  | 5.73                                     | 6.05 | 6.29 | 6.40 | 6.50 | 6.69 | 6.87 |
| Uracil         | 5 $^1A'$  | 6.33                                     | 6.72 | 7.00 | 7.12 | 7.24 | 7.45 | 7.64 |
| Adenine        | 2 $^1A'$  |                                          |      | 4.95 | 5.04 | 5.13 | 5.28 |      |
| Adenine        | 3 $^1A'$  |                                          |      | 5.06 | 5.16 | 5.24 | 5.41 |      |

Table S18: CASPT2 approximate dynamical correlation energies  $\tilde{E}^{\text{dyn}}$  for the Thiel benchmark set obtained using the ANO-RCC-MB basis set and different IPEA shift parameters ( $\varepsilon = 0, 0.10, 0.20, 0.25, 0.30, 0.40, \text{ and } 0.50$  a.u.).

| MB Basis Set |              | Dynamical Correlation $\tilde{E}^{\text{dyn}}$ [eV] |      |      |      |      |      |      |
|--------------|--------------|-----------------------------------------------------|------|------|------|------|------|------|
| Molecule     | State        | 0                                                   | 0.10 | 0.20 | 0.25 | 0.30 | 0.40 | 0.50 |
| Ethene       | 1 $^1B_{1u}$ | 3.64                                                | 3.56 | 3.49 | 3.45 | 3.42 | 3.35 | 3.29 |
| Ethene       | 1 $^3B_{1u}$ | 1.80                                                | 1.77 | 1.76 | 1.75 | 1.74 | 1.73 | 1.71 |
| Butadiene    | 1 $^1B_u$    | 5.81                                                | 5.69 | 5.59 | 5.55 | 5.51 | 5.43 | 5.36 |
| Butadiene    | 1 $^3B_u$    | 4.11                                                | 4.06 | 4.02 | 4.01 | 3.99 | 3.96 | 3.93 |
| Butadiene    | 1 $^3A_g$    | 3.93                                                | 3.89 | 3.85 | 3.83 | 3.82 | 3.78 | 3.76 |
| Hexatriene   | 1 $^1B_u$    | 6.30                                                | 6.18 | 6.10 | 6.06 | 6.03 | 5.97 | 5.92 |
| Hexatriene   | 2 $^1A_g$    | 6.33                                                | 6.24 | 6.19 | 6.16 | 6.13 | 6.09 | 6.04 |
| Hexatriene   | 1 $^3B_u$    | 6.34                                                | 6.26 | 6.22 | 6.20 | 6.18 | 6.15 | 6.11 |
| Hexatriene   | 1 $^3A_g$    | 6.19                                                | 6.12 | 6.07 | 6.05 | 6.02 | 5.98 | 5.95 |
| Octatetraene | 2 $^1A_g$    | 8.49                                                | 8.39 | 8.32 | 8.29 | 8.27 | 8.21 | 8.16 |
| Octatetraene | 1 $^1B_u$    | 8.42                                                | 8.29 | 8.22 | 8.18 | 8.15 | 8.09 | 8.03 |
| Octatetraene | 2 $^1B_u$    | 9.95                                                | 9.81 | 9.71 | 9.67 | 9.62 | 9.54 | 9.47 |
| Octatetraene | 1 $^3B_u$    | 8.47                                                | 8.38 | 8.33 | 8.31 | 8.29 | 8.25 | 8.21 |
| Octatetraene | 1 $^3A_g$    | 8.36                                                | 8.26 | 8.20 | 8.17 | 8.15 | 8.10 | 8.06 |

Table S18: . . . continued

| MB Basis Set    |              | Dynamical Correlation $\tilde{E}^{\text{dyn}}$ [eV] |       |       |       |       |       |       |
|-----------------|--------------|-----------------------------------------------------|-------|-------|-------|-------|-------|-------|
| Molecule        | State        | 0                                                   | 0.10  | 0.20  | 0.25  | 0.30  | 0.40  | 0.50  |
| Cyclopropene    | 1 $^1B_1$    | 3.53                                                | 3.47  | 3.42  | 3.39  | 3.37  | 3.32  | 3.28  |
| Cyclopropene    | 1 $^1B_2$    | 4.57                                                | 4.48  | 4.39  | 4.35  | 4.31  | 4.24  | 4.17  |
| Cyclopropene    | 1 $^3B_2$    | 3.17                                                | 3.14  | 3.12  | 3.10  | 3.09  | 3.07  | 3.05  |
| Cyclopropene    | 1 $^3B_1$    | 3.38                                                | 3.32  | 3.27  | 3.24  | 3.22  | 3.17  | 3.13  |
| Cyclopentadiene | 1 $^1B_2$    | 7.56                                                | 7.42  | 7.31  | 7.25  | 7.20  | 7.11  | 7.02  |
| Cyclopentadiene | 2 $^1A_1$    | 5.77                                                | 5.64  | 5.55  | 5.51  | 5.48  | 5.41  | 5.36  |
| Cyclopentadiene | 3 $^1A_1$    | 7.80                                                | 7.57  | 7.40  | 7.33  | 7.26  | 7.13  | 7.02  |
| Cyclopentadiene | 1 $^3B_2$    | 5.43                                                | 5.37  | 5.32  | 5.30  | 5.28  | 5.24  | 5.21  |
| Norbornadiene   | 1 $^1A_2$    | 10.67                                               | 10.52 | 10.38 | 10.31 | 10.25 | 10.14 | 10.03 |
| Norbornadiene   | 1 $^1B_2$    | 10.98                                               | 10.80 | 10.64 | 10.57 | 10.50 | 10.36 | 10.24 |
| Norbornadiene   | 2 $^1B_2$    | 11.40                                               | 11.13 | 10.93 | 10.84 | 10.76 | 10.62 | 10.49 |
| Norbornadiene   | 2 $^1A_2$    | 10.83                                               | 10.65 | 10.49 | 10.42 | 10.35 | 10.22 | 10.10 |
| Norbornadiene   | 1 $^3A_2$    | 8.19                                                | 8.11  | 8.05  | 8.03  | 8.00  | 7.96  | 7.91  |
| Norbornadiene   | 1 $^3B_2$    | 8.15                                                | 8.08  | 8.02  | 7.99  | 7.97  | 7.92  | 7.87  |
| Benzene         | 2 $^1A'$     | 6.24                                                | 6.16  | 6.10  | 6.07  | 6.04  | 5.99  | 5.94  |
| Benzene         | 3 $^1A'$     | 7.68                                                | 7.52  | 7.40  | 7.35  | 7.29  | 7.20  | 7.11  |
| Benzene         | 4 $^1A'$     | 6.05                                                | 5.94  | 5.87  | 5.84  | 5.81  | 5.75  | 5.70  |
| Benzene         | 5 $^1A'$     | 6.05                                                | 5.93  | 5.85  | 5.81  | 5.78  | 5.72  | 5.66  |
| Benzene         | 6 $^1A'$     | 8.08                                                | 7.89  | 7.73  | 7.66  | 7.59  | 7.47  | 7.36  |
| Benzene         | 7 $^1A'$     | 8.08                                                | 7.88  | 7.73  | 7.66  | 7.59  | 7.47  | 7.36  |
| Benzene         | 1 $^3A'$     | 6.07                                                | 6.01  | 5.96  | 5.94  | 5.92  | 5.88  | 5.84  |
| Benzene         | 2 $^3A'$     | 6.33                                                | 6.22  | 6.15  | 6.12  | 6.09  | 6.04  | 5.99  |
| Benzene         | 3 $^3A'$     | 6.33                                                | 6.21  | 6.14  | 6.11  | 6.08  | 6.03  | 5.98  |
| Benzene         | 4 $^3A'$     | 7.53                                                | 7.39  | 7.27  | 7.22  | 7.17  | 7.08  | 7.00  |
| Naphthalene     | 1 $^1B_{3u}$ | 10.63                                               | 10.51 | 10.43 | 10.40 | 10.36 | 10.30 | 10.24 |
| Naphthalene     | 1 $^1B_{2u}$ | 12.01                                               | 11.86 | 11.75 | 11.70 | 11.65 | 11.56 | 11.48 |
| Naphthalene     | 2 $^1A_g$    | 10.47                                               | 10.33 | 10.24 | 10.20 | 10.16 | 10.08 | 10.01 |
| Naphthalene     | 1 $^1B_{1g}$ | 10.85                                               | 10.63 | 10.53 | 10.48 | 10.43 | 10.35 | 10.27 |
| Naphthalene     | 2 $^1B_{3u}$ | 12.17                                               | 11.95 | 11.79 | 11.72 | 11.65 | 11.53 | 11.42 |
| Naphthalene     | 2 $^1B_{2u}$ | 12.00                                               | 11.84 | 11.71 | 11.66 | 11.60 | 11.51 | 11.42 |
| Naphthalene     | 3 $^1A_g$    | 10.60                                               | 10.40 | 10.29 | 10.24 | 10.20 | 10.11 | 10.03 |
| Naphthalene     | 3 $^1B_{2u}$ | 10.29                                               | 10.11 | 9.99  | 9.94  | 9.90  | 9.81  | 9.73  |
| Furan           | 1 $^1B_2$    | 6.51                                                | 6.34  | 6.22  | 6.17  | 6.13  | 6.04  | 5.96  |
| Furan           | 3 $^1A_1$    | 6.84                                                | 6.56  | 6.38  | 6.31  | 6.23  | 6.11  | 5.99  |
| Furan           | 1 $^3B_2$    | 5.07                                                | 5.02  | 4.97  | 4.95  | 4.93  | 4.90  | 4.86  |
| Furan           | 1 $^3A_1$    | 5.20                                                | 5.11  | 5.05  | 5.03  | 5.00  | 4.95  | 4.91  |
| Pyrrole         | 1 $^1B_2$    | 6.66                                                | 6.50  | 6.38  | 6.33  | 6.28  | 6.20  | 6.12  |
| Pyrrole         | 3 $^1A_1$    | 6.97                                                | 6.73  | 6.57  | 6.50  | 6.44  | 6.32  | 6.22  |

Table S18: . . . continued

| MB Basis Set |              | Dynamical Correlation $\tilde{E}^{\text{dyn}}$ [eV] |      |      |      |      |      |      |
|--------------|--------------|-----------------------------------------------------|------|------|------|------|------|------|
| Molecule     | State        | 0                                                   | 0.10 | 0.20 | 0.25 | 0.30 | 0.40 | 0.50 |
| Pyrrole      | 1 $^3B_2$    | 5.43                                                | 5.37 | 5.32 | 5.30 | 5.28 | 5.24 | 5.21 |
| Pyrrole      | 1 $^3A_1$    | 5.65                                                | 5.56 | 5.49 | 5.46 | 5.43 | 5.38 | 5.33 |
| Imidazole    | 2 $^1A'$     | 6.07                                                | 5.96 | 5.86 | 5.81 | 5.77 | 5.69 | 5.62 |
| Imidazole    | 3 $^1A'$     | 6.76                                                | 6.62 | 6.51 | 6.46 | 6.42 | 6.34 | 6.26 |
| Pyridine     | 2 $^1A_1$    | 7.89                                                | 7.70 | 7.57 | 7.51 | 7.46 | 7.36 | 7.27 |
| Pyridine     | 3 $^1A_1$    | 6.05                                                | 5.91 | 5.81 | 5.76 | 5.72 | 5.65 | 5.59 |
| Pyridine     | 1 $^1B_1$    | 6.42                                                | 6.34 | 6.28 | 6.26 | 6.24 | 6.19 | 6.15 |
| Pyridine     | 1 $^1A_2$    | 6.66                                                | 6.57 | 6.51 | 6.48 | 6.46 | 6.41 | 6.36 |
| Pyridine     | 1 $^3A_1$    | 6.08                                                | 6.01 | 5.96 | 5.94 | 5.91 | 5.87 | 5.83 |
| Pyridine     | 1 $^3B_2$    | 6.38                                                | 6.25 | 6.17 | 6.14 | 6.11 | 6.05 | 6.00 |
| Pyrazine     | 1 $^1B_{2u}$ | 6.26                                                | 6.18 | 6.11 | 6.08 | 6.05 | 5.99 | 5.94 |
| Pyrazine     | 1 $^1B_{1u}$ | 7.77                                                | 7.62 | 7.50 | 7.45 | 7.40 | 7.30 | 7.22 |
| Pyrazine     | 2 $^1B_{1u}$ | 8.65                                                | 8.43 | 8.26 | 8.18 | 8.11 | 7.98 | 7.86 |
| Pyrazine     | 2 $^1B_{2u}$ | 6.74                                                | 6.60 | 6.50 | 6.45 | 6.41 | 6.33 | 6.25 |
| Pyrazine     | 1 $^1B_{3u}$ | 6.74                                                | 6.64 | 6.57 | 6.53 | 6.50 | 6.45 | 6.39 |
| Pyrazine     | 1 $^1B_{2g}$ | 6.26                                                | 6.16 | 6.10 | 6.08 | 6.05 | 6.00 | 5.95 |
| Pyrazine     | 1 $^1B_{1g}$ | 6.89                                                | 6.72 | 6.62 | 6.58 | 6.54 | 6.46 | 6.39 |
| Pyrimidine   | 1 $^1B_2$    | 6.21                                                | 6.12 | 6.05 | 6.02 | 5.99 | 5.93 | 5.88 |
| Pyrimidine   | 2 $^1A_1$    | 7.96                                                | 7.76 | 7.63 | 7.57 | 7.52 | 7.42 | 7.34 |
| Pyrimidine   | 3 $^1A_1$    | 6.96                                                | 6.79 | 6.67 | 6.62 | 6.57 | 6.47 | 6.39 |
| Pyrimidine   | 2 $^1B_2$    | 6.56                                                | 6.41 | 6.31 | 6.27 | 6.23 | 6.15 | 6.08 |
| Pyrimidine   | 1 $^1B_1$    | 6.65                                                | 6.56 | 6.49 | 6.46 | 6.43 | 6.37 | 6.32 |
| Pyrimidine   | 1 $^1A_2$    | 6.88                                                | 6.78 | 6.70 | 6.66 | 6.63 | 6.57 | 6.51 |
| Pyridazine   | 2 $^1A_1$    | 6.20                                                | 6.11 | 6.04 | 6.01 | 5.98 | 5.92 | 5.87 |
| Pyridazine   | 1 $^1B_2$    | 8.31                                                | 7.97 | 7.78 | 7.70 | 7.63 | 7.50 | 7.40 |
| Pyridazine   | 2 $^1B_2$    | 6.09                                                | 5.88 | 5.76 | 5.71 | 5.66 | 5.58 | 5.50 |
| Pyridazine   | 3 $^1A_1$    | 6.30                                                | 6.22 | 6.17 | 6.15 | 6.12 | 6.08 | 6.04 |
| Pyridazine   | 1 $^1B_1$    | 6.77                                                | 6.67 | 6.60 | 6.57 | 6.54 | 6.49 | 6.44 |
| Pyridazine   | 2 $^1A_2$    | 6.69                                                | 6.55 | 6.45 | 6.41 | 8.04 | 7.98 | 7.93 |
| Pyridazine   | 2 $^1B_1$    | 6.83                                                | 6.66 | 6.56 | 6.52 | 6.47 | 6.40 | 6.33 |
| Triazine     | 2 $^1A'$     | 6.22                                                | 6.12 | 6.06 | 6.02 | 5.99 | 5.93 | 5.88 |
| Triazine     | 3 $^1A'$     | 7.08                                                | 6.90 | 6.77 | 6.72 | 6.67 | 6.58 | 6.49 |
| Triazine     | 4 $^1A'$     | 6.74                                                | 6.54 | 6.41 | 6.36 | 6.30 | 6.20 | 6.12 |
| Triazine     | 2 $^1A''$    | 7.08                                                | 6.92 | 6.80 | 6.76 | 6.71 | 6.63 | 6.55 |
| Triazine     | 3 $^1A''$    | 7.06                                                | 6.91 | 6.80 | 6.75 | 6.71 | 6.63 | 6.55 |
| Triazine     | 4 $^1A''$    | 7.61                                                | 7.40 | 7.26 | 7.20 | 7.15 | 7.04 | 6.95 |
| Tetrazine    | 1 $^1B_{2u}$ | 6.16                                                | 6.06 | 5.99 | 5.96 | 5.93 | 5.87 | 5.81 |
| Tetrazine    | 1 $^1B_{1u}$ | 7.03                                                | 6.84 | 6.71 | 6.65 | 6.60 | 6.50 | 6.42 |

Table S18: . . . continued

| MB Basis Set |              | Dynamical Correlation $\tilde{E}^{\text{dyn}}$ [eV] |       |       |       |       |       |       |
|--------------|--------------|-----------------------------------------------------|-------|-------|-------|-------|-------|-------|
| Molecule     | State        | 0                                                   | 0.10  | 0.20  | 0.25  | 0.30  | 0.40  | 0.50  |
| Tetrazine    | 2 $^1B_{1u}$ | 8.06                                                | 7.75  | 7.55  | 7.47  | 7.39  | 7.25  | 7.12  |
| Tetrazine    | 2 $^1B_{2u}$ | 6.55                                                | 6.36  | 6.24  | 6.19  | 6.14  | 6.05  | 5.97  |
| Tetrazine    | 1 $^1B_{3u}$ | 7.02                                                | 6.91  | 6.84  | 6.80  | 6.77  | 6.70  | 6.65  |
| Tetrazine    | 1 $^1A_u$    | 7.29                                                | 7.16  | 7.06  | 7.02  | 6.98  | 6.91  | 6.84  |
| Tetrazine    | 2 $^1B_{2g}$ | 6.93                                                | 6.74  | 6.62  | 6.57  | 6.52  | 6.42  | 6.34  |
| Tetrazine    | 2 $^1B_{1g}$ | 6.79                                                | 6.61  | 6.49  | 6.43  | 6.38  | 6.28  | 6.19  |
| Tetrazine    | 2 $^1B_{3u}$ | 7.10                                                | 6.94  | 6.82  | 6.77  | 6.72  | 6.62  | 6.54  |
| Tetrazine    | 1 $^3B_{3u}$ | 8.77                                                | 8.66  | 8.58  | 8.54  | 8.51  | 8.44  | 8.38  |
| Tetrazine    | 1 $^3A_u$    | 9.38                                                | 9.23  | 9.13  | 9.09  | 9.05  | 8.97  | 8.89  |
| Tetrazine    | 1 $^3B_{1g}$ | 6.91                                                | 6.78  | 6.70  | 6.66  | 6.63  | 6.56  | 6.50  |
| Formaldehyde | 1 $^1A_2$    | 1.58                                                | 1.56  | 1.53  | 1.52  | 1.51  | 1.49  | 1.47  |
| Formaldehyde | 1 $^3A_2$    | 1.59                                                | 1.56  | 1.53  | 1.52  | 1.51  | 1.48  | 1.46  |
| Formaldehyde | 1 $^3A_1$    | 1.17                                                | 1.16  | 1.15  | 1.14  | 1.14  | 1.13  | 1.12  |
| Acetone      | 1 $^1A_2$    | 3.86                                                | 3.83  | 3.81  | 3.79  | 3.78  | 3.76  | 3.74  |
| Acetone      | 1 $^3A_2$    | 3.87                                                | 3.84  | 3.81  | 3.79  | 3.78  | 3.75  | 3.73  |
| Acetone      | 1 $^3A_1$    | 3.52                                                | 3.50  | 3.48  | 3.47  | 3.46  | 3.45  | 3.43  |
| Benzoquinone | 1 $^1B_{1g}$ | 7.71                                                | 7.58  | 7.50  | 7.47  | 7.44  | 7.38  | 7.32  |
| Benzoquinone | 1 $^1A_u$    | 7.66                                                | 7.54  | 7.47  | 7.44  | 7.41  | 7.35  | 7.30  |
| Benzoquinone | 1 $^1B_{3g}$ | 8.16                                                | 7.93  | 7.80  | 7.75  | 7.70  | 7.61  | 7.53  |
| Benzoquinone | 1 $^1B_{1u}$ | 9.48                                                | 9.26  | 9.13  | 9.07  | 9.02  | 8.92  | 8.83  |
| Benzoquinone | 2 $^1B_{1u}$ | 10.33                                               | 10.05 | 9.92  | 9.88  | 9.84  | 9.76  | 9.70  |
| Benzoquinone | 1 $^3B_{1g}$ | 7.73                                                | 7.59  | 7.50  | 7.47  | 7.43  | 7.37  | 7.31  |
| Benzoquinone | 1 $^3A_u$    | 7.66                                                | 7.53  | 7.46  | 7.43  | 7.39  | 7.34  | 7.28  |
| Formamide    | 1 $^1A''$    | 2.77                                                | 2.75  | 2.72  | 2.71  | 2.70  | 2.68  | 2.66  |
| Formamide    | 2 $^1A'$     | 4.48                                                | 4.36  | 4.26  | 4.21  | 4.17  | 4.09  | 4.01  |
| Acetamide    | 1 $^1A''$    | 4.02                                                | 3.99  | 3.97  | 3.96  | 3.95  | 3.93  | 3.91  |
| Acetamide    | 2 $^1A'$     | 5.76                                                | 5.64  | 5.54  | 5.49  | 5.45  | 5.37  | 5.29  |
| Acetamide    | 3 $^1A'$     | 5.73                                                | 5.62  | 5.53  | 5.49  | 5.45  | 5.37  | 5.30  |
| Propanamide  | 1 $^1A''$    | 5.33                                                | 5.30  | 5.28  | 5.27  | 5.26  | 5.24  | 5.22  |
| Propanamide  | 2 $^1A'$     | 7.11                                                | 6.99  | 6.89  | 6.84  | 6.80  | 6.71  | 6.63  |
| Propanamide  | 3 $^1A'$     | 7.10                                                | 6.99  | 6.90  | 6.85  | 6.81  | 6.73  | 6.66  |
| Cytosine     | 2 $^1A'$     | 9.42                                                | 9.29  | 9.21  | 9.18  | 9.15  | 9.08  | 9.02  |
| Cytosine     | 1 $^1A''$    | 9.16                                                | 9.04  | 8.97  | 8.93  | 8.90  | 8.84  | 8.78  |
| Cytosine     | 3 $^1A'$     | 9.66                                                | 9.46  | 9.34  | 9.29  | 9.24  | 9.15  | 9.07  |
| Cytosine     | 4 $^1A'$     | 10.33                                               | 10.10 | 9.96  | 9.90  | 9.85  | 9.75  | 9.66  |
| Cytosine     | 5 $^1A'$     | 9.83                                                | 9.66  | 9.53  | 9.47  | 9.42  | 9.32  | 9.23  |
| Thymine      | 1 $^1A''$    | 9.81                                                | 9.75  | 9.69  | 9.67  | 9.65  | 9.60  | 9.56  |
| Thymine      | 2 $^1A'$     | 10.78                                               | 10.62 | 10.52 | 10.47 | 10.43 | 10.35 | 10.28 |

Table S18: . . . continued

| MB Basis Set |           | Dynamical Correlation $\tilde{E}^{\text{dyn}}$ [eV] |       |       |       |       |       |       |
|--------------|-----------|-----------------------------------------------------|-------|-------|-------|-------|-------|-------|
| Molecule     | State     | 0                                                   | 0.10  | 0.20  | 0.25  | 0.30  | 0.40  | 0.50  |
| Thymine      | 3 $^1A'$  | 10.64                                               | 10.46 | 10.35 | 10.30 | 10.26 | 10.18 | 10.11 |
| Thymine      | 4 $^1A'$  | 11.09                                               | 10.86 | 10.72 | 10.66 | 10.60 | 10.50 | 10.41 |
| Thymine      | 5 $^1A'$  | 11.37                                               | 11.13 | 10.96 | 10.89 | 10.83 | 10.71 | 10.61 |
| Uracil       | 1 $^1A''$ | 8.52                                                | 8.45  | 8.39  | 8.37  | 8.35  | 8.30  | 8.26  |
| Uracil       | 2 $^1A'$  | 9.40                                                | 9.25  | 9.15  | 9.11  | 9.06  | 8.98  | 8.91  |
| Uracil       | 3 $^1A'$  | 9.29                                                | 9.11  | 9.01  | 8.96  | 8.92  | 8.84  | 8.77  |
| Uracil       | 4 $^1A'$  | 9.72                                                | 9.49  | 9.35  | 9.29  | 9.24  | 9.13  | 9.04  |
| Uracil       | 5 $^1A'$  | 8.84                                                | 8.65  | 8.52  | 8.47  | 8.42  | 8.33  | 8.24  |
| Adenine      | 2 $^1A'$  | 11.94                                               | 11.77 | 11.65 | 11.60 | 11.55 | 11.47 | 11.39 |
| Adenine      | 3 $^1A'$  | 12.94                                               | 12.72 | 12.58 | 12.52 | 12.46 | 12.36 | 12.27 |
| Adenine      | 1 $^1A''$ | 12.06                                               | 11.93 | 11.84 | 11.79 |       |       |       |
| Adenine      | 4 $^1A'$  | 11.99                                               | 11.77 | 11.63 | 11.57 | 11.52 | 11.42 | 11.32 |
| Adenine      | 5 $^1A'$  | 12.06                                               | 11.84 | 11.69 | 11.63 | 11.58 | 11.47 | 11.38 |
| Adenine      | 6 $^1A'$  | 12.49                                               | 12.24 | 12.09 | 12.02 | 11.96 | 11.84 | 11.73 |
| Adenine      | 7 $^1A'$  | 12.06                                               | 11.85 | 11.71 | 11.65 | 11.59 | 11.48 | 11.38 |

Table S19: CASPT2 approximate dynamical correlation energies  $\tilde{E}^{\text{dyn}}$  for the Thiel benchmark set obtained using the ANO-RCC-VDZ basis set and different IPEA shift parameters ( $\varepsilon = 0, 0.10, 0.20, 0.25, 0.30, 0.40, \text{ and } 0.50$  a.u.).

| VDZ Basis Set |              | Dynamical Correlation $\tilde{E}^{\text{dyn}}$ [eV] |       |       |       |       |       |       |
|---------------|--------------|-----------------------------------------------------|-------|-------|-------|-------|-------|-------|
| Molecule      | State        | 0                                                   | 0.10  | 0.20  | 0.25  | 0.30  | 0.40  | 0.50  |
| Ethene        | 1 $^1B_{1u}$ | 5.57                                                | 5.46  | 5.37  | 5.32  | 5.28  | 5.19  | 5.11  |
| Ethene        | 1 $^3B_{1u}$ | 3.78                                                | 3.74  | 3.71  | 3.69  | 3.67  | 3.64  | 3.62  |
| Butadiene     | 1 $^1B_u$    | 10.12                                               | 9.95  | 9.82  | 9.76  | 9.70  | 9.59  | 9.49  |
| Butadiene     | 1 $^3B_u$    | 8.07                                                | 7.99  | 7.88  | 7.88  | 7.85  | 7.79  | 7.73  |
| Butadiene     | 1 $^3A_g$    | 7.96                                                | 7.87  | 7.80  | 7.76  | 7.72  | 7.66  | 7.60  |
| Hexatriene    | 1 $^1B_u$    | 13.35                                               | 13.15 | 13.00 | 12.93 | 12.87 | 12.75 | 12.64 |
| Hexatriene    | 2 $^1A_g$    | 12.32                                               | 12.18 | 12.07 | 12.02 | 11.98 | 11.89 | 11.80 |
| Hexatriene    | 1 $^3B_u$    | 12.20                                               | 12.07 | 11.99 | 11.96 | 11.92 | 11.86 | 11.80 |
| Hexatriene    | 1 $^3A_g$    | 12.12                                               | 11.99 | 11.90 | 11.85 | 11.81 | 11.73 | 11.65 |
| Octatetraene  | 2 $^1A_g$    | 16.33                                               | 16.16 | 16.05 | 16.00 | 15.95 | 15.85 | 15.76 |
| Octatetraene  | 1 $^3B_u$    | 16.18                                               | 16.03 | 15.94 | 15.90 | 15.86 | 15.79 | 15.72 |
| Octatetraene  | 1 $^3A_g$    | 16.14                                               | 15.97 | 15.86 | 15.81 | 15.77 | 15.68 | 15.59 |
| Cyclopropene  | 1 $^1B_1$    | 6.86                                                | 6.76  | 6.68  | 6.64  | 6.60  | 6.53  | 6.46  |
| Cyclopropene  | 1 $^1B_2$    | 8.30                                                | 8.16  | 8.03  | 7.97  | 7.92  | 7.81  | 7.71  |
| Cyclopropene  | 1 $^3B_2$    | 6.19                                                | 6.14  | 6.09  | 6.06  | 6.04  | 6.00  | 5.96  |
| Cyclopropene  | 1 $^3B_1$    | 6.68                                                | 6.58  | 6.49  | 6.49  | 6.41  | 6.34  | 6.27  |

Table S19: ... continued

| VDZ Basis Set   |              | Dynamical Correlation $\tilde{E}^{\text{dyn}}$ [eV] |       |       |       |       |       |       |
|-----------------|--------------|-----------------------------------------------------|-------|-------|-------|-------|-------|-------|
| Molecule        | State        | 0                                                   | 0.10  | 0.20  | 0.25  | 0.30  | 0.40  | 0.50  |
| Cyclopentadiene | 1 $^1B_2$    | 12.57                                               | 12.40 | 12.26 | 12.19 | 12.13 | 12.01 | 11.90 |
| Cyclopentadiene | 2 $^1A_1$    | 11.14                                               | 10.94 | 10.78 | 10.71 | 10.65 | 10.53 | 10.43 |
| Cyclopentadiene | 3 $^1A_1$    | 13.19                                               | 12.91 | 12.69 | 12.60 | 12.51 | 12.35 | 12.21 |
| Cyclopentadiene | 1 $^3B_2$    | 10.34                                               | 10.25 | 10.16 | 10.12 | 10.09 | 10.02 | 9.95  |
| Norbornadiene   | 1 $^1A_2$    | 17.76                                               | 17.58 | 17.41 | 17.33 | 17.26 | 17.12 | 16.99 |
| Norbornadiene   | 1 $^1B_2$    | 18.52                                               | 18.29 | 18.08 | 17.98 | 17.89 | 17.71 | 17.55 |
| Norbornadiene   | 2 $^1B_2$    | 18.55                                               | 18.27 | 18.04 | 17.94 | 17.84 | 17.67 | 17.51 |
| Norbornadiene   | 2 $^1A_2$    | 18.19                                               | 17.98 | 17.79 | 17.71 | 17.62 | 17.46 | 17.32 |
| Norbornadiene   | 1 $^3A_2$    | 15.39                                               | 15.26 | 15.15 | 15.10 | 15.05 | 14.97 | 14.89 |
| Norbornadiene   | 1 $^3B_2$    | 15.32                                               | 15.19 | 15.08 | 15.03 | 14.98 | 14.89 | 14.80 |
| Benzene         | 2 $^1A'$     | 11.98                                               | 11.85 | 11.74 | 11.69 | 11.64 | 11.55 | 11.46 |
| Benzene         | 3 $^1A'$     | 13.76                                               | 13.54 | 13.37 | 13.29 | 13.21 | 13.07 | 12.94 |
| Benzene         | 4 $^1A'$     | 14.41                                               | 14.12 | 13.89 | 13.78 | 13.68 | 13.50 | 13.33 |
| Benzene         | 5 $^1A'$     | 14.41                                               | 14.12 | 13.89 | 13.78 | 13.68 | 13.50 | 13.33 |
| Benzene         | 6 $^1A'$     | 11.98                                               | 11.79 | 11.66 | 11.60 | 11.55 | 11.44 | 11.34 |
| Benzene         | 7 $^1A'$     | 11.98                                               | 11.78 | 11.64 | 11.58 | 11.52 | 11.40 | 11.30 |
| Benzene         | 1 $^3A'$     | 11.72                                               | 11.60 | 11.51 | 11.47 | 11.43 | 11.35 | 11.28 |
| Benzene         | 2 $^3A'$     | 12.16                                               | 11.98 | 11.86 | 11.80 | 11.75 | 11.65 | 11.56 |
| Benzene         | 3 $^3A'$     | 12.16                                               | 11.97 | 11.85 | 11.79 | 11.74 | 11.64 | 11.55 |
| Benzene         | 4 $^3A'$     | 13.75                                               | 13.53 | 13.35 | 13.27 | 13.19 | 13.05 | 12.92 |
| Naphthalene     | 1 $^1B_{3u}$ | 19.96                                               | 19.77 | 19.64 | 19.58 | 19.52 | 19.41 | 19.30 |
| Naphthalene     | 1 $^1B_{2u}$ | 21.70                                               | 21.50 | 21.33 | 21.26 | 21.19 | 21.06 | 20.94 |
| Naphthalene     | 2 $^1A_g$    | 19.90                                               | 19.67 | 19.51 | 19.43 | 19.36 | 19.22 | 19.10 |
| Naphthalene     | 1 $^1B_{1g}$ | 20.45                                               | 20.15 | 19.97 | 19.89 | 19.82 | 19.67 | 19.54 |
| Naphthalene     | 2 $^1B_{3u}$ | 21.63                                               | 21.31 | 21.06 | 20.96 | 20.85 | 20.66 | 20.49 |
| Naphthalene     | 2 $^1B_{2u}$ | 21.73                                               | 21.50 | 21.32 | 21.24 | 21.16 | 21.02 | 20.88 |
| Naphthalene     | 3 $^1A_g$    | 20.18                                               | 19.87 | 19.68 | 19.60 | 19.52 | 19.36 | 19.22 |
| Naphthalene     | 3 $^1B_{2u}$ | 20.15                                               | 19.83 | 19.59 | 19.49 | 19.39 | 19.21 | 19.04 |
| Furan           | 1 $^1B_2$    | 12.97                                               | 12.75 | 12.59 | 12.59 | 12.45 | 12.32 | 12.20 |
| Furan           | 3 $^1A_1$    | 13.71                                               | 13.27 | 12.99 | 12.86 | 12.75 | 12.54 | 12.36 |
| Furan           | 1 $^3B_2$    | 10.96                                               | 10.86 | 10.78 | 10.74 | 10.71 | 10.64 | 10.58 |
| Furan           | 1 $^3A_1$    | 11.18                                               | 11.04 | 10.93 | 10.88 | 10.84 | 10.75 | 10.66 |
| Pyrrole         | 1 $^1B_2$    | 12.51                                               | 12.31 | 12.15 | 12.07 | 12.00 | 11.88 | 11.76 |
| Pyrrole         | 3 $^1A_1$    | 12.66                                               | 12.35 | 12.13 | 12.03 | 11.94 | 11.78 | 11.63 |
| Pyrrole         | 1 $^3B_2$    | 10.73                                               | 10.63 | 10.55 | 10.51 | 10.48 | 10.41 | 10.35 |
| Pyrrole         | 1 $^3A_1$    | 11.08                                               | 10.93 | 10.81 | 10.76 | 10.71 | 10.61 | 10.53 |
| Imidazole       | 2 $^1A'$     | 12.42                                               | 12.21 | 12.04 | 11.96 | 11.89 | 11.77 | 11.64 |
| Imidazole       | 3 $^1A'$     | 13.19                                               | 12.99 | 12.84 | 12.76 | 12.70 | 12.57 | 12.45 |

Table S19: ... continued

| VDZ Basis Set |              | Dynamical Correlation $\tilde{E}^{\text{dyn}}$ [eV] |       |       |       |       |       |       |
|---------------|--------------|-----------------------------------------------------|-------|-------|-------|-------|-------|-------|
| Molecule      | State        | 0                                                   | 0.10  | 0.20  | 0.25  | 0.30  | 0.40  | 0.50  |
| Pyridine      | 2 $^1A_1$    | 14.48                                               | 14.01 | 13.80 | 13.70 | 13.59 | 13.41 | 13.25 |
| Pyridine      | 3 $^1A_1$    | 15.13                                               | 14.81 | 14.56 | 14.45 | 14.35 | 14.16 | 13.99 |
| Pyridine      | 1 $^1B_1$    | 12.48                                               | 12.36 | 12.27 | 12.23 | 11.83 | 11.75 | 11.67 |
| Pyridine      | 1 $^1A_2$    | 12.88                                               | 12.75 | 12.64 | 12.64 | 12.81 | 12.74 | 12.68 |
| Pyridine      | 1 $^3A_1$    | 12.20                                               | 12.07 | 11.98 | 11.93 | 11.89 | 11.81 | 11.73 |
| Pyridine      | 1 $^3B_2$    | 12.88                                               | 12.65 | 12.51 | 12.45 | 12.39 | 12.28 | 12.18 |
| Pyrazine      | 1 $^1B_{2u}$ | 13.13                                               | 12.95 | 12.82 | 12.76 | 12.70 | 12.60 | 12.50 |
| Pyrazine      | 1 $^1B_{1u}$ | 14.82                                               | 14.61 | 14.44 | 14.36 | 14.29 | 14.15 | 14.02 |
| Pyrazine      | 2 $^1B_{1u}$ | 15.90                                               | 15.60 | 15.37 | 15.26 | 15.16 | 14.97 | 14.80 |
| Pyrazine      | 2 $^1B_{2u}$ | 15.52                                               | 15.23 | 15.00 | 14.89 | 14.79 | 14.61 | 14.44 |
| Pyrazine      | 1 $^1B_{3u}$ | 13.58                                               | 13.42 | 13.29 | 13.23 | 13.18 | 13.08 | 12.98 |
| Pyrazine      | 1 $^1B_{2g}$ | 12.94                                               | 12.78 | 12.67 | 12.62 | 13.66 | 13.52 | 13.39 |
| Pyrazine      | 1 $^1B_{1g}$ | 14.04                                               | 13.70 | 13.55 | 13.46 | 13.38 | 13.23 | 13.10 |
| Pyrimidine    | 1 $^1B_2$    | 12.99                                               | 12.83 | 12.71 | 12.65 | 12.60 | 12.50 | 12.40 |
| Pyrimidine    | 2 $^1A_1$    | 14.76                                               | 14.41 | 14.21 | 14.12 | 14.04 | 13.88 | 13.75 |
| Pyrimidine    | 3 $^1A_1$    | 14.75                                               | 14.48 | 14.28 | 14.18 | 14.09 | 13.93 | 13.78 |
| Pyrimidine    | 2 $^1B_2$    | 15.94                                               | 15.61 | 15.37 | 15.26 | 15.15 | 14.96 | 14.78 |
| Pyrimidine    | 1 $^1B_1$    | 13.34                                               | 13.19 | 13.08 | 13.03 | 12.98 | 12.89 | 12.80 |
| Pyrimidine    | 1 $^1A_2$    | 13.67                                               | 13.50 | 13.37 | 13.31 | 13.26 | 13.15 | 13.05 |
| Pyridazine    | 2 $^1A_1$    | 12.97                                               | 12.82 | 12.70 | 12.65 | 12.59 | 12.49 | 12.39 |
| Pyridazine    | 1 $^1B_2$    | 15.75                                               | 15.40 | 15.17 | 15.07 | 14.98 | 14.81 | 14.65 |
| Pyridazine    | 2 $^1B_2$    | 15.73                                               | 15.42 | 15.18 | 15.08 | 14.98 | 14.80 | 14.63 |
| Pyridazine    | 3 $^1A_1$    | 13.15                                               | 13.03 | 12.94 | 12.90 | 12.86 | 12.78 | 12.71 |
| Pyridazine    | 1 $^1B_1$    | 13.74                                               | 13.57 | 13.45 | 13.39 | 13.34 | 13.23 | 13.14 |
| Pyridazine    | 2 $^1A_2$    | 13.62                                               | 13.41 | 13.25 | 13.18 | 13.12 | 13.00 | 12.88 |
| Pyridazine    | 2 $^1B_1$    | 13.77                                               | 13.53 | 13.36 | 13.28 | 13.21 | 13.08 | 12.96 |
| Triazine      | 2 $^1A'$     | 13.38                                               | 13.22 | 13.11 | 13.05 | 13.00 | 12.90 | 12.80 |
| Triazine      | 3 $^1A'$     | 15.88                                               | 15.62 | 15.42 | 15.33 | 15.24 | 15.09 | 14.95 |
| Triazine      | 4 $^1A'$     | 14.65                                               | 14.38 | 14.17 | 14.08 | 13.99 | 13.83 | 13.67 |
| Triazine      | 2 $^1A''$    | 15.18                                               | 14.81 | 14.63 | 14.56 | 14.49 | 14.33 | 14.18 |
| Triazine      | 3 $^1A''$    | 14.11                                               | 13.89 | 13.71 | 13.63 | 13.55 | 13.41 | 13.27 |
| Triazine      | 4 $^1A''$    | 14.49                                               | 14.28 | 14.11 | 14.03 | 13.95 | 13.81 | 13.68 |
| Tetrazine     | 1 $^1B_{2u}$ | 14.20                                               | 13.99 | 13.84 | 13.77 | 13.70 | 13.58 | 13.47 |
| Tetrazine     | 1 $^1B_{1u}$ | 15.83                                               | 15.41 | 15.12 | 14.99 | 14.87 | 14.66 | 14.47 |
| Tetrazine     | 2 $^1B_{1u}$ | 16.91                                               | 16.56 | 16.29 | 16.18 | 16.07 | 15.87 | 15.68 |
| Tetrazine     | 2 $^1B_{2u}$ | 14.79                                               | 14.49 | 14.29 | 14.19 | 14.10 | 13.93 | 13.78 |
| Tetrazine     | 1 $^1B_{3u}$ | 15.13                                               | 14.94 | 14.81 | 14.74 | 14.68 | 14.57 | 14.46 |
| Tetrazine     | 1 $^1A_u$    | 15.43                                               | 15.18 | 15.00 | 14.92 | 14.85 | 14.71 | 14.58 |

Table S19: ... continued

| VDZ Basis Set |              | Dynamical Correlation $\tilde{E}^{\text{dyn}}$ [eV] |       |       |       |       |       |       |
|---------------|--------------|-----------------------------------------------------|-------|-------|-------|-------|-------|-------|
| Molecule      | State        | 0                                                   | 0.10  | 0.20  | 0.25  | 0.30  | 0.40  | 0.50  |
| Tetrazine     | 2 $^1B_{2g}$ | 15.07                                               | 14.77 | 14.56 | 14.47 | 14.38 | 14.21 | 14.06 |
| Tetrazine     | 2 $^1B_{1g}$ | 14.98                                               | 14.71 | 14.48 | 14.38 | 14.28 | 14.10 | 13.93 |
| Tetrazine     | 2 $^1B_{3u}$ | 15.19                                               | 14.91 | 14.70 | 14.61 | 14.52 | 14.36 | 14.21 |
| Tetrazine     | 1 $^3B_{3u}$ | 16.63                                               | 16.42 | 16.28 | 16.21 | 16.14 | 16.02 | 15.90 |
| Tetrazine     | 1 $^3A_u$    | 16.43                                               | 16.16 | 15.97 | 15.89 | 15.81 | 15.66 | 15.52 |
| Tetrazine     | 1 $^3B_{1g}$ | 15.09                                               | 14.86 | 14.70 | 14.63 | 14.56 | 14.43 | 14.31 |
| Formaldehyde  | 1 $^1A_2$    | 4.45                                                | 4.40  | 4.35  | 4.33  | 4.30  | 4.26  | 4.22  |
| Formaldehyde  | 1 $^3A_2$    | 4.55                                                | 4.47  | 4.41  | 4.38  | 4.35  | 4.29  | 4.24  |
| Formaldehyde  | 1 $^3A_1$    | 3.84                                                | 3.81  | 3.78  | 3.76  | 3.75  | 3.72  | 3.70  |
| Acetone       | 1 $^1A_2$    | 9.05                                                | 8.98  | 8.92  | 8.89  | 8.86  | 8.81  | 8.76  |
| Acetone       | 1 $^3A_2$    | 8.66                                                | 8.58  | 8.51  | 8.51  | 8.45  | 8.39  | 8.34  |
| Acetone       | 1 $^3A_1$    | 8.51                                                | 8.46  | 8.41  | 8.39  | 8.37  | 8.33  | 8.29  |
| Benzoquinone  | 1 $^1B_{1g}$ | 17.50                                               | 17.25 | 17.09 | 17.02 | 16.95 | 16.83 | 16.71 |
| Benzoquinone  | 1 $^1A_u$    |                                                     | 17.19 | 17.04 | 16.98 | 16.91 | 16.80 | 16.68 |
| Benzoquinone  | 1 $^1B_{3g}$ | 18.56                                               | 18.19 | 17.99 | 17.90 | 17.82 | 17.67 | 17.53 |
| Benzoquinone  | 1 $^1B_{1u}$ | 20.12                                               | 19.76 | 19.53 | 19.43 | 19.33 | 19.16 | 19.00 |
| Benzoquinone  | 2 $^1B_{1u}$ | 21.51                                               | 21.05 | 20.71 | 20.56 | 20.41 | 20.14 | 19.90 |
| Benzoquinone  | 1 $^3B_{1g}$ | 17.49                                               | 17.22 | 17.05 | 16.98 | 16.91 | 16.77 | 16.65 |
| Benzoquinone  | 1 $^3A_u$    | 17.37                                               | 17.14 | 16.99 | 16.92 | 16.85 | 16.73 | 16.61 |
| Formamide     | 1 $^1A''$    | 7.26                                                | 7.20  | 7.15  | 7.13  | 7.10  | 7.06  | 7.02  |
| Formamide     | 2 $^1A'$     | 10.12                                               | 9.87  | 9.69  | 9.61  | 9.53  | 9.39  | 9.26  |
| Formamide     | 1 $^3A''$    | 7.27                                                | 7.19  | 7.12  | 7.09  | 7.06  | 7.00  | 6.95  |
| Acetamide     | 1 $^1A''$    | 9.70                                                | 9.65  | 9.59  | 9.57  | 9.54  | 9.50  | 9.45  |
| Acetamide     | 2 $^1A'$     | 12.62                                               | 12.40 | 12.22 | 12.13 | 12.06 | 11.91 | 11.78 |
| Acetamide     | 3 $^1A'$     | 12.57                                               | 12.37 | 12.19 | 12.11 | 12.03 | 11.89 | 11.75 |
| Propanamide   | 1 $^1A''$    | 12.17                                               | 12.11 | 12.06 | 12.04 | 12.01 | 11.96 | 11.92 |
| Propanamide   | 2 $^1A'$     | 15.16                                               | 14.93 | 14.75 | 14.66 | 14.58 | 14.44 | 14.31 |
| Propanamide   | 3 $^1A'$     | 15.18                                               | 14.95 | 14.76 | 14.68 | 14.59 | 14.44 | 14.30 |
| Cytosine      | 2 $^1A'$     | 20.25                                               | 20.07 | 19.94 | 19.89 | 19.83 | 19.73 | 19.63 |
| Cytosine      | 1 $^1A''$    | 19.73                                               | 19.55 | 19.42 | 19.36 | 19.30 | 19.19 | 19.08 |
| Cytosine      | 3 $^1A'$     | 20.82                                               | 20.54 | 20.35 | 20.26 | 20.18 | 20.04 | 19.90 |
| Cytosine      | 4 $^1A'$     | 21.82                                               | 21.49 | 21.27 | 21.17 | 21.07 | 20.90 | 20.74 |
| Cytosine      | 5 $^1A'$     | 20.87                                               | 20.58 | 20.38 | 20.29 | 20.21 | 20.05 | 19.90 |
| Thymine       | 2 $^1A'$     | 23.98                                               | 23.75 | 23.58 | 23.51 | 23.44 | 23.30 | 23.18 |
| Thymine       | 3 $^1A'$     | 23.64                                               | 23.33 | 23.13 | 23.04 | 22.96 | 22.81 | 22.67 |
| Thymine       | 4 $^1A'$     | 24.33                                               | 24.01 | 23.79 | 23.69 | 23.60 | 23.43 | 23.28 |
| Thymine       | 5 $^1A'$     | 24.43                                               | 24.09 | 23.87 | 23.77 | 23.67 | 23.50 | 23.34 |
| Uracil        | 1 $^1A''$    | 19.40                                               | 19.27 | 19.18 | 19.14 | 19.09 | 19.02 | 18.94 |

Table S19: ... continued

| VDZ Basis Set |          | Dynamical Correlation $\tilde{E}^{\text{dyn}}$ [eV] |       |       |       |       |       |       |
|---------------|----------|-----------------------------------------------------|-------|-------|-------|-------|-------|-------|
| Molecule      | State    | 0                                                   | 0.10  | 0.20  | 0.25  | 0.30  | 0.40  | 0.50  |
| Uracil        | 2 $^1A'$ | 21.31                                               | 21.09 | 20.93 | 20.86 | 20.79 | 20.66 | 20.54 |
| Uracil        | 3 $^1A'$ | 21.01                                               | 20.76 | 20.59 | 20.51 | 20.44 | 20.30 | 20.17 |
| Uracil        | 4 $^1A'$ | 21.67                                               | 21.37 | 21.16 | 21.06 | 20.98 | 20.82 | 20.67 |
| Uracil        | 5 $^1A'$ | 21.84                                               | 21.51 | 21.28 | 21.18 | 21.09 | 20.92 | 20.76 |
| Adenine       | 2 $^1A'$ | 24.28                                               | 24.01 | 23.83 | 23.75 | 23.67 | 23.53 | 23.40 |
| Adenine       | 3 $^1A'$ | 25.44                                               | 25.16 | 24.98 | 24.90 | 24.82 | 24.68 | 24.55 |
| Adenine       | 4 $^1A'$ | 26.00                                               | 25.47 | 25.21 | 25.09 | 24.99 | 24.80 | 24.62 |
| Adenine       | 5 $^1A'$ | 24.82                                               | 24.22 | 23.99 | 23.90 | 23.81 | 23.65 | 23.50 |
| Adenine       | 6 $^1A'$ | 24.89                                               | 24.53 | 24.31 | 24.20 | 24.11 | 23.93 | 23.76 |
| Adenine       | 7 $^1A'$ | 25.38                                               | 24.56 | 24.32 | 24.22 | 24.12 | 23.93 | 23.76 |

Table S20: CASPT2 approximate dynamical correlation energies  $\tilde{E}^{\text{dyn}}$  for the Thiel benchmark set obtained using the ANO-RCC-VDZP basis set and different IPEA shift parameters ( $\varepsilon = 0, 0.10, 0.20, 0.25, 0.30, 0.40, \text{ and } 0.50$  a.u.).

| VDZP Basis Set  |              | Dynamical Correlation $\tilde{E}^{\text{dyn}}$ [eV] |       |       |       |       |       |       |
|-----------------|--------------|-----------------------------------------------------|-------|-------|-------|-------|-------|-------|
| Molecule        | State        | 0                                                   | 0.10  | 0.20  | 0.25  | 0.30  | 0.40  | 0.50  |
| Ethene          | 1 $^1B_{1u}$ | 8.53                                                | 8.39  | 8.27  | 8.21  | 8.15  | 8.04  | 7.94  |
| Ethene          | 1 $^3B_{1u}$ | 6.86                                                | 6.79  | 6.72  | 6.69  | 6.66  | 6.60  | 6.55  |
| Butadiene       | 1 $^1B_u$    | 15.98                                               | 15.77 | 15.59 | 15.51 | 15.43 | 15.29 | 15.15 |
| Butadiene       | 1 $^3B_u$    | 13.80                                               | 13.67 | 13.56 | 13.51 | 13.46 | 13.36 | 13.27 |
| Butadiene       | 1 $^3A_g$    | 13.75                                               | 13.60 | 13.48 | 13.42 | 13.36 | 13.25 | 13.15 |
| Hexatriene      | 1 $^1B_u$    | 22.82                                               | 22.57 | 22.37 | 22.29 | 22.20 | 22.05 | 21.90 |
| Hexatriene      | 2 $^1A_g$    | 20.77                                               | 20.57 | 20.41 | 20.34 | 20.26 | 20.13 | 20.00 |
| Hexatriene      | 1 $^3B_u$    | 20.36                                               | 20.24 | 20.18 | 20.13 | 20.13 | 20.03 | 19.93 |
| Hexatriene      | 1 $^3A_g$    | 20.51                                               | 20.32 | 20.17 | 20.11 | 20.04 | 19.91 | 19.79 |
| Octatetraene    | 2 $^1A_g$    | 27.35                                               | 27.12 | 26.95 | 26.87 | 26.79 | 26.64 | 26.50 |
| Octatetraene    | 1 $^1B_u$    | 29.36                                               | 29.11 | 28.91 | 28.82 | 28.73 | 28.57 | 28.42 |
| Octatetraene    | 2 $^1B_u$    | 28.28                                               | 28.00 | 27.79 | 27.69 | 27.60 | 27.42 | 27.25 |
| Octatetraene    | 1 $^3B_u$    | 28.41                                               | 28.21 | 28.07 | 28.01 | 27.95 | 27.83 | 27.72 |
| Octatetraene    | 1 $^3A_g$    | 25.79                                               | 25.55 | 25.39 | 25.31 | 25.24 | 25.10 | 24.96 |
| Cyclopropene    | 1 $^1B_1$    | 11.19                                               | 11.07 | 10.95 | 10.90 | 10.84 | 10.74 | 10.64 |
| Cyclopropene    | 1 $^1B_2$    | 12.60                                               | 12.42 | 12.26 | 12.19 | 12.11 | 11.98 | 11.85 |
| Cyclopropene    | 1 $^3B_2$    | 10.42                                               | 10.33 | 10.25 | 10.21 | 10.17 | 10.10 | 10.04 |
| Cyclopropene    | 1 $^3B_1$    | 11.02                                               | 10.87 | 10.75 | 10.69 | 10.63 | 10.53 | 10.43 |
| Cyclopentadiene | 1 $^1B_2$    | 19.64                                               | 19.43 | 19.26 | 19.18 | 19.10 | 18.95 | 18.81 |
| Cyclopentadiene | 2 $^1A_1$    | 18.35                                               | 18.06 | 17.84 | 17.74 | 17.65 | 17.48 | 17.33 |
| Cyclopentadiene | 3 $^1A_1$    | 20.48                                               | 20.11 | 19.68 | 19.57 | 19.56 | 19.33 | 19.13 |

Table S20: . . . continued

| VDZP Basis Set  |              | Dynamical Correlation $\tilde{E}^{\text{dyn}}$ [eV] |       |       |       |       |       |       |
|-----------------|--------------|-----------------------------------------------------|-------|-------|-------|-------|-------|-------|
| Molecule        | State        | 0                                                   | 0.10  | 0.20  | 0.25  | 0.30  | 0.40  | 0.50  |
| Cyclopentadiene | 1 $^3B_2$    | 17.29                                               | 17.15 | 17.03 | 16.98 | 16.92 | 16.82 | 16.72 |
| Norbornadiene   | 1 $^1A_2$    | 27.63                                               | 27.41 | 27.21 | 27.11 | 27.02 | 26.85 | 26.69 |
| Norbornadiene   | 1 $^1B_2$    | 28.24                                               | 27.94 | 27.67 | 27.55 | 27.43 | 27.20 | 26.99 |
| Norbornadiene   | 2 $^1B_2$    | 27.49                                               | 27.21 | 26.98 | 26.87 | 26.77 | 26.58 | 26.41 |
| Norbornadiene   | 2 $^1A_2$    | 28.13                                               | 27.88 | 27.66 | 27.55 | 27.45 | 27.26 | 27.09 |
| Benzene         | 2 $^1A'$     | 20.14                                               | 19.95 | 19.79 | 19.71 | 19.64 | 19.50 | 19.37 |
| Benzene         | 3 $^1A'$     | 22.08                                               | 21.81 | 21.58 | 21.47 | 21.37 | 21.18 | 21.01 |
| Benzene         | 4 $^1A'$     | 22.83                                               | 22.47 | 22.17 | 22.04 | 21.91 | 21.67 | 21.46 |
| Benzene         | 5 $^1A'$     | 22.82                                               | 22.47 | 22.17 | 22.03 | 21.91 | 21.67 | 21.45 |
| Benzene         | 6 $^1A'$     | 20.29                                               | 20.02 | 19.83 | 19.74 | 19.66 | 19.49 | 19.34 |
| Benzene         | 7 $^1A'$     | 20.28                                               | 20.01 | 19.81 | 19.71 | 19.62 | 19.45 | 19.29 |
| Benzene         | 1 $^3A'$     | 19.87                                               | 19.69 | 19.55 | 19.48 | 19.42 | 19.29 | 19.18 |
| Benzene         | 2 $^3A'$     | 22.61                                               | 22.37 | 22.18 | 22.10 | 22.02 | 21.87 | 21.73 |
| Benzene         | 3 $^3A'$     | 22.61                                               | 22.36 | 22.18 | 22.09 | 22.01 | 21.86 | 21.72 |
| Benzene         | 4 $^3A'$     | 22.14                                               | 21.86 | 21.63 | 21.52 | 21.41 | 21.22 | 21.04 |
| Naphthalene     | 1 $^1B_{3u}$ | 33.03                                               | 32.77 | 32.57 | 32.48 | 32.39 | 32.23 | 32.07 |
| Naphthalene     | 1 $^1B_{2u}$ | 34.89                                               | 34.62 | 34.41 | 34.31 | 34.22 | 34.04 | 33.87 |
| Naphthalene     | 2 $^1A_g$    | 33.05                                               | 32.73 | 32.49 | 32.38 | 32.27 | 32.07 | 31.87 |
| Naphthalene     | 1 $^1B_{1g}$ | 33.69                                               | 33.30 | 33.05 | 32.93 | 32.82 | 32.61 | 32.41 |
| Naphthalene     | 2 $^1B_{3u}$ | 35.44                                               | 35.02 | 34.71 | 34.56 | 34.43 | 34.18 | 33.95 |
| Naphthalene     | 2 $^1B_{2u}$ | 34.95                                               | 34.65 | 34.41 | 34.30 | 34.19 | 34.00 | 33.81 |
| Naphthalene     | 3 $^1A_g$    | 33.43                                               | 33.03 | 32.76 | 32.64 | 33.69 | 33.50 | 33.33 |
| Naphthalene     | 3 $^1B_{2u}$ | 35.43                                               | 35.02 | 34.71 | 34.57 | 34.44 | 34.19 | 33.96 |
| Furan           | 1 $^1B_2$    | 20.69                                               | 20.35 | 20.15 | 20.06 | 19.97 | 19.81 | 19.65 |
| Furan           | 3 $^1A_1$    | 21.45                                               | 20.94 | 20.59 | 20.43 | 20.29 | 20.03 | 19.80 |
| Furan           | 1 $^3B_2$    | 18.25                                               | 18.11 | 18.00 | 17.95 | 17.90 | 17.80 | 17.71 |
| Furan           | 1 $^3A_1$    | 18.55                                               | 18.36 | 18.20 | 18.13 | 18.06 | 17.94 | 17.82 |
| Pyrrole         | 1 $^1B_2$    | 20.03                                               | 19.76 | 19.55 | 19.45 | 19.36 | 19.18 | 19.02 |
| Pyrrole         | 3 $^1A_1$    | 20.27                                               | 19.90 | 19.62 | 19.50 | 19.38 | 19.16 | 18.96 |
| Pyrrole         | 1 $^3B_2$    | 18.06                                               | 17.93 | 17.81 | 17.76 | 17.71 | 17.61 | 17.51 |
| Pyrrole         | 1 $^3A_1$    | 18.51                                               | 18.31 | 18.14 | 18.06 | 17.99 | 17.85 | 17.72 |
| Imidazole       | 2 $^1A'$     | 20.20                                               | 19.91 | 19.49 | 19.59 | 19.50 | 19.32 | 19.15 |
| Imidazole       | 3 $^1A'$     | 20.62                                               | 20.39 | 20.07 | 20.11 | 20.02 | 19.86 | 19.71 |
| Pyridine        | 2 $^1A_1$    | 23.15                                               | 22.63 | 22.33 | 22.19 | 22.07 | 21.84 | 21.63 |
| Pyridine        | 3 $^1A_1$    | 23.54                                               | 23.15 | 22.84 | 22.70 | 22.57 | 22.32 | 22.10 |
| Pyridine        | 1 $^1B_1$    | 20.81                                               | 20.65 | 20.52 | 20.46 | 20.08 | 19.96 | 19.85 |
| Pyridine        | 1 $^1A_2$    | 21.27                                               | 21.09 | 20.95 | 20.89 | 21.23 | 21.12 | 21.02 |
| Pyridine        | 1 $^3A_1$    | 20.49                                               | 20.29 | 20.15 | 20.08 | 20.01 | 19.88 | 19.76 |

Table S20: . . . continued

| VDZP Basis Set |              | Dynamical Correlation $\tilde{E}^{\text{dyn}}$ [eV] |       |       |       |       |       |       |
|----------------|--------------|-----------------------------------------------------|-------|-------|-------|-------|-------|-------|
| Molecule       | State        | 0                                                   | 0.10  | 0.20  | 0.25  | 0.30  | 0.40  | 0.50  |
| Pyridine       | 1 $^3B_2$    | 21.43                                               | 21.10 | 20.88 | 20.79 | 20.70 | 20.54 | 20.39 |
| Pyrazine       | 1 $^1B_{2u}$ | 21.65                                               | 21.40 | 21.21 | 21.12 | 21.04 | 20.89 | 20.74 |
| Pyrazine       | 1 $^1B_{1u}$ | 23.30                                               | 23.03 | 22.82 | 22.72 | 22.62 | 22.45 | 22.28 |
| Pyrazine       | 2 $^1B_{1u}$ | 24.30                                               | 23.95 | 23.67 | 23.54 | 23.41 | 23.18 | 22.97 |
| Pyrazine       | 2 $^1B_{2u}$ | 24.00                                               | 23.67 | 23.40 | 23.27 | 23.15 | 22.92 | 22.71 |
| Pyrazine       | 1 $^1B_{3u}$ | 22.19                                               | 21.97 | 21.80 | 21.72 | 21.64 | 21.50 | 21.36 |
| Pyrazine       | 1 $^1B_{2g}$ | 21.57                                               | 21.36 | 21.19 | 21.12 | 21.04 | 20.90 | 20.77 |
| Pyrazine       | 1 $^1B_{1g}$ | 22.77                                               | 22.41 | 22.15 | 22.03 | 21.92 | 21.71 | 21.52 |
| Pyrimidine     | 1 $^1B_2$    | 21.52                                               | 21.29 | 21.10 | 21.02 | 20.94 | 20.78 | 20.64 |
| Pyrimidine     | 2 $^1A_1$    | 23.40                                               | 23.04 | 22.81 | 22.71 | 22.61 | 22.43 | 22.27 |
| Pyrimidine     | 3 $^1A_1$    | 23.35                                               | 23.00 | 22.72 | 22.60 | 22.48 | 22.25 | 22.05 |
| Pyrimidine     | 2 $^1B_2$    | 24.79                                               | 24.33 | 23.98 | 23.81 | 23.66 | 23.39 | 23.14 |
| Pyrimidine     | 1 $^1B_1$    | 21.89                                               | 21.70 | 21.54 | 21.47 | 21.40 | 21.27 | 21.15 |
| Pyrimidine     | 1 $^1A_2$    | 22.26                                               | 22.05 | 21.88 | 21.80 | 21.73 | 21.58 | 21.44 |
| Pyridazine     | 2 $^1A_1$    | 21.48                                               | 21.26 | 21.09 | 21.00 | 20.92 | 20.77 | 20.63 |
| Pyridazine     | 1 $^1B_2$    | 24.35                                               | 23.94 | 23.67 | 23.55 | 23.44 | 23.22 | 23.03 |
| Pyridazine     | 2 $^1B_2$    | 24.33                                               | 23.90 | 23.59 | 23.45 | 23.31 | 23.07 | 22.85 |
| Pyridazine     | 3 $^1A_1$    | 24.05                                               | 22.39 | 22.07 | 21.93 | 21.80 | 21.55 | 21.33 |
| Pyridazine     | 1 $^1B_1$    | 22.38                                               | 22.16 | 22.00 | 21.92 | 21.84 | 21.70 | 21.57 |
| Pyridazine     | 2 $^1A_2$    | 22.17                                               | 21.92 | 21.73 | 21.64 | 21.55 | 21.38 | 21.23 |
| Pyridazine     | 2 $^1B_1$    | 22.40                                               | 22.11 | 21.89 | 21.79 | 21.70 | 21.52 | 21.36 |
| Triazine       | 2 $^1A'$     | 21.97                                               | 21.77 | 21.60 | 21.52 | 21.44 | 21.30 | 21.16 |
| Triazine       | 3 $^1A'$     | 24.05                                               | 23.75 | 23.52 | 23.41 | 23.31 | 23.13 | 22.95 |
| Triazine       | 4 $^1A'$     | 25.75                                               | 25.33 | 25.01 | 24.87 | 24.73 | 24.48 | 24.24 |
| Triazine       | 2 $^1A''$    | 23.05                                               | 22.62 | 22.40 | 22.29 | 22.19 | 22.01 | 21.83 |
| Triazine       | 3 $^1A''$    | 23.29                                               | 23.00 | 22.76 | 22.65 | 22.55 | 22.35 | 22.17 |
| Triazine       | 4 $^1A''$    | 23.23                                               | 22.98 | 22.74 | 22.64 | 22.54 | 22.34 | 22.16 |
| Tetrazine      | 1 $^1B_{2u}$ | 23.01                                               | 22.74 | 22.53 | 22.43 | 22.34 | 22.17 | 22.01 |
| Tetrazine      | 1 $^1B_{1u}$ | 25.61                                               | 25.25 | 24.97 | 24.84 | 24.72 | 24.48 | 24.27 |
| Tetrazine      | 2 $^1B_{1u}$ | 26.00                                               | 25.62 | 25.32 | 25.19 | 25.06 | 24.82 | 24.60 |
| Tetrazine      | 2 $^1B_{2u}$ | 24.08                                               | 23.66 | 23.36 | 23.22 | 23.10 | 22.86 | 22.64 |
| Tetrazine      | 1 $^1B_{3u}$ | 23.96                                               | 23.73 | 23.54 | 23.46 | 23.38 | 23.22 | 23.08 |
| Tetrazine      | 1 $^1A_u$    | 24.30                                               | 23.98 | 23.76 | 23.65 | 23.55 | 23.37 | 23.20 |
| Tetrazine      | 2 $^1B_{2g}$ | 25.20                                               | 24.69 | 24.41 | 24.28 | 24.16 | 23.93 | 23.71 |
| Tetrazine      | 2 $^1B_{1g}$ | 23.91                                               | 23.54 | 23.23 | 23.09 | 22.96 | 22.71 | 22.48 |
| Tetrazine      | 2 $^1B_{3u}$ | 24.10                                               | 23.75 | 23.48 | 23.36 | 23.24 | 23.02 | 22.81 |
| Tetrazine      | 1 $^3B_{3u}$ | 24.97                                               | 24.72 | 24.53 | 24.44 | 24.35 | 24.19 | 24.04 |
| Tetrazine      | 1 $^3A_u$    | 24.51                                               | 24.18 | 23.94 | 23.83 | 23.72 | 23.52 | 23.33 |

Table S20: ... continued

| VDZP Basis Set |              | Dynamical Correlation $\tilde{E}^{\text{dyn}}$ [eV] |       |       |       |       |       |       |
|----------------|--------------|-----------------------------------------------------|-------|-------|-------|-------|-------|-------|
| Molecule       | State        | 0                                                   | 0.10  | 0.20  | 0.25  | 0.30  | 0.40  | 0.50  |
| Tetrazine      | 1 $^3B_{1g}$ | 23.87                                               | 23.58 | 23.37 | 23.27 | 23.18 | 23.00 | 22.84 |
| Formaldehyde   | 1 $^1A_2$    | 7.83                                                | 7.75  | 7.68  | 7.64  | 7.61  | 7.54  | 7.48  |
| Formaldehyde   | 1 $^3A_2$    | 7.95                                                | 7.85  | 7.75  | 7.71  | 7.66  | 7.58  | 7.51  |
| Formaldehyde   | 1 $^3A_1$    | 7.24                                                | 7.17  | 7.11  | 7.08  | 7.05  | 7.00  | 6.95  |
| Acetone        | 1 $^1A_2$    | 15.48                                               | 15.39 | 15.31 | 15.27 | 15.23 | 15.16 | 15.09 |
| Acetone        | 1 $^3A_2$    | 15.22                                               | 15.10 | 15.00 | 14.95 | 14.90 | 14.82 | 14.73 |
| Acetone        | 1 $^3A_1$    | 14.94                                               | 14.86 | 14.78 | 14.75 | 14.72 | 14.65 | 14.59 |
| Benzoquinone   | 1 $^1B_{1g}$ | 28.89                                               | 28.60 | 28.38 | 28.29 | 28.20 | 28.02 | 27.86 |
| Benzoquinone   | 1 $^1A_u$    | 28.83                                               | 28.56 | 28.36 | 28.26 | 28.17 | 28.00 | 27.84 |
| Benzoquinone   | 1 $^1B_{3g}$ | 30.10                                               | 29.74 | 29.50 | 29.40 | 29.30 | 29.12 | 28.95 |
| Benzoquinone   | 1 $^1B_{1u}$ | 30.99                                               | 30.68 | 30.45 | 30.34 | 30.24 | 30.06 | 29.88 |
| Benzoquinone   | 2 $^1B_{1u}$ | 33.30                                               | 32.79 | 32.39 | 32.21 | 32.04 | 31.71 | 31.42 |
| Benzoquinone   | 1 $^3B_{1g}$ | 28.87                                               | 28.54 | 28.32 | 28.22 | 28.12 | 27.94 | 27.77 |
| Benzoquinone   | 1 $^3A_u$    | 28.78                                               | 28.49 | 28.27 | 28.18 | 28.08 | 27.91 | 27.74 |
| Formamide      | 1 $^1A''$    | 12.54                                               | 12.47 | 12.39 | 12.36 | 12.32 | 12.26 | 12.19 |
| Formamide      | 2 $^1A'$     | 15.14                                               | 14.90 | 14.70 | 14.62 | 14.53 | 14.37 | 14.23 |
| Formamide      | 1 $^3A''$    | 12.54                                               | 12.44 | 12.34 | 12.29 | 12.25 | 12.16 | 12.09 |
| Acetamide      | 1 $^1A''$    | 20.24                                               | 20.16 | 20.08 | 20.05 | 20.01 | 19.94 | 19.87 |
| Acetamide      | 2 $^1A'$     | 22.27                                               | 22.04 | 21.85 | 21.76 | 21.67 | 21.51 | 21.36 |
| Acetamide      | 3 $^1A'$     | 12.80                                               | 12.55 | 12.33 | 12.23 | 12.14 | 11.96 | 11.79 |
| Propanamide    | 1 $^1A''$    | 20.56                                               | 20.47 | 20.40 | 20.36 | 20.32 | 20.25 | 20.18 |
| Propanamide    | 2 $^1A'$     | 23.31                                               | 23.07 | 22.87 | 22.78 | 22.69 | 22.53 | 22.38 |
| Propanamide    | 3 $^1A'$     | 23.68                                               | 23.40 | 23.17 | 23.07 | 22.97 | 22.78 | 22.61 |
| Cytosine       | 2 $^1A'$     | 32.59                                               | 32.37 | 32.20 | 32.13 | 32.05 | 31.91 | 31.78 |
| Cytosine       | 1 $^1A''$    | 32.20                                               | 31.96 | 31.79 | 31.71 | 31.63 | 31.48 | 31.34 |
| Cytosine       | 3 $^1A'$     | 33.11                                               | 32.81 | 32.58 | 32.48 | 32.38 | 32.20 | 32.03 |
| Cytosine       | 4 $^1A'$     | 33.92                                               | 33.55 | 33.28 | 33.16 | 33.05 | 32.83 | 32.63 |
| Cytosine       | 5 $^1A'$     | 33.41                                               | 33.04 | 32.78 | 32.66 | 32.55 | 32.33 | 32.13 |
| Thymine        | 1 $^1A''$    | 35.93                                               | 35.76 | 35.63 | 35.57 | 35.51 | 35.41 | 35.30 |
| Thymine        | 2 $^1A'$     | 37.84                                               | 37.57 | 37.38 | 37.29 | 37.21 | 37.04 | 36.89 |
| Thymine        | 3 $^1A'$     | 37.64                                               | 37.32 | 37.09 | 36.99 | 36.90 | 36.72 | 36.55 |
| Thymine        | 4 $^1A'$     | 38.11                                               | 37.78 | 37.54 | 37.43 | 37.33 | 37.14 | 36.96 |
| Thymine        | 5 $^1A'$     | 38.23                                               | 37.86 | 37.59 | 37.47 | 37.36 | 37.15 | 36.95 |
| Uracil         | 1 $^1A''$    | 31.89                                               | 31.72 | 31.59 | 31.53 | 31.47 | 31.36 | 31.26 |
| Uracil         | 2 $^1A'$     | 33.63                                               | 33.37 | 33.18 | 33.09 | 33.00 | 32.84 | 32.69 |
| Uracil         | 3 $^1A'$     | 33.49                                               | 33.23 | 33.03 | 32.94 | 32.85 | 32.69 | 32.53 |
| Uracil         | 4 $^1A'$     | 33.90                                               | 33.58 | 33.35 | 33.24 | 33.14 | 32.95 | 32.77 |
| Uracil         | 5 $^1A'$     | 34.07                                               | 33.71 | 33.45 | 33.33 | 33.22 | 33.02 | 32.82 |

Table S20: . . . continued

| VDZP Basis Set |           | Dynamical Correlation $\tilde{E}^{\text{dyn}}$ [eV] |       |       |       |       |       |       |
|----------------|-----------|-----------------------------------------------------|-------|-------|-------|-------|-------|-------|
| Molecule       | State     | 0                                                   | 0.10  | 0.20  | 0.25  | 0.30  | 0.40  | 0.50  |
| Adenine        | 2 $^1A'$  | 38.87                                               | 38.55 | 38.31 | 38.21 | 38.11 | 37.92 | 37.74 |
| Adenine        | 3 $^1A'$  | 40.00                                               | 39.68 | 39.46 | 39.36 | 39.26 | 39.07 | 38.90 |
| Adenine        | 1 $^1A''$ | 39.22                                               | 39.05 | 38.77 | 38.68 | 38.59 | 38.42 | 38.27 |
| Adenine        | 4 $^1A'$  | 40.67                                               | 40.20 | 39.90 | 39.76 | 39.63 | 39.39 | 39.16 |
| Adenine        | 5 $^1A'$  | 39.24                                               | 38.81 | 38.55 | 38.44 | 38.33 | 38.12 | 37.93 |
| Adenine        | 6 $^1A'$  | 39.66                                               | 39.22 | 38.93 | 38.80 | 38.68 | 38.45 | 38.23 |
| Adenine        | 7 $^1A'$  | 39.83                                               | 39.25 | 38.95 | 38.82 | 38.69 | 38.44 | 38.22 |

Table S21: CASPT2 approximate dynamical correlation energies  $\tilde{E}^{\text{dyn}}$  for the Thiel benchmark set obtained using the ANO-RCC-VTZP basis set and different IPEA shift parameters ( $\varepsilon = 0, 0.10, 0.20, 0.25, 0.30, 0.40, \text{ and } 0.50$  a.u.).

| VTZP Basis Set  |              | Dynamical Correlation $\tilde{E}^{\text{dyn}}$ [eV] |       |       |       |       |       |       |
|-----------------|--------------|-----------------------------------------------------|-------|-------|-------|-------|-------|-------|
| Molecule        | State        | 0                                                   | 0.10  | 0.20  | 0.25  | 0.30  | 0.40  | 0.50  |
| Ethene          | 1 $^1B_{1u}$ | 9.82                                                | 9.68  | 9.56  | 9.50  | 9.44  | 9.33  | 9.24  |
| Ethene          | 1 $^3B_{1u}$ | 8.42                                                | 8.34  | 8.27  | 8.24  | 8.20  | 8.14  | 8.08  |
| Butadiene       | 1 $^1B_u$    | 19.07                                               | 18.85 | 18.66 | 18.57 | 18.49 | 18.33 | 18.19 |
| Butadiene       | 1 $^3B_u$    | 16.72                                               | 16.58 | 16.46 | 16.41 | 16.35 | 16.25 | 16.15 |
| Butadiene       | 1 $^3A_g$    | 16.71                                               | 16.55 | 16.41 | 16.35 | 16.28 | 16.16 | 16.05 |
| Hexatriene      | 1 $^1B_u$    | 27.46                                               | 26.96 | 26.76 | 26.67 | 26.58 | 26.41 | 26.25 |
| Hexatriene      | 2 $^1A_g$    | 25.13                                               | 24.91 | 24.73 | 24.64 | 24.56 | 24.41 | 24.27 |
| Hexatriene      | 1 $^3B_u$    | 24.82                                               | 24.64 | 24.50 | 24.44 | 24.38 | 24.27 | 24.17 |
| Hexatriene      | 1 $^3A_g$    | 24.84                                               | 24.62 | 24.46 | 24.38 | 24.31 | 24.17 | 24.04 |
| Octatetraene    | 2 $^1A_g$    | 33.03                                               | 32.78 | 32.59 | 32.51 | 32.42 | 32.26 | 32.10 |
| Octatetraene    | 1 $^1B_u$    | 35.13                                               | 34.85 | 34.64 | 34.54 | 34.45 | 34.27 | 34.11 |
| Octatetraene    | 2 $^1B_u$    | 33.25                                               | 32.93 | 32.69 | 32.58 | 32.47 | 32.27 | 32.09 |
| Octatetraene    | 1 $^3B_u$    | 32.73                                               | 32.52 | 32.37 | 32.30 | 32.23 | 32.11 | 31.99 |
| Octatetraene    | 1 $^3A_g$    | 32.77                                               | 32.51 | 32.33 | 32.25 | 32.17 | 32.01 | 31.87 |
| Cyclopropene    | 1 $^1B_1$    | 13.47                                               | 13.34 | 13.21 | 13.15 | 13.09 | 12.98 | 12.88 |
| Cyclopropene    | 1 $^1B_2$    | 14.62                                               | 14.44 | 14.28 | 14.20 | 14.12 | 13.99 | 13.86 |
| Cyclopropene    | 1 $^3B_2$    | 12.64                                               | 12.55 | 12.46 | 12.41 | 12.37 | 12.30 | 12.22 |
| Cyclopropene    | 1 $^3B_1$    | 13.29                                               | 13.13 | 13.00 | 12.93 | 12.87 | 12.76 | 12.65 |
| Cyclopentadiene | 2 $^1A_1$    | 22.19                                               | 21.86 | 21.60 | 21.48 | 21.38 | 21.18 | 21.01 |
| Cyclopentadiene | 3 $^1A_1$    | 24.64                                               | 24.07 | 23.72 | 23.57 | 23.42 | 23.15 | 22.91 |
| Norbornadiene   | 1 $^1A_2$    | 31.65                                               | 31.48 | 31.32 | 31.25 | 31.18 | 31.04 | 30.92 |
| Norbornadiene   | 1 $^1B_2$    | 31.12                                               | 30.94 | 30.79 | 30.72 | 30.65 | 30.51 | 30.39 |
| Norbornadiene   | 2 $^1B_2$    | 31.74                                               | 31.56 | 31.39 | 31.30 | 31.23 | 31.08 | 30.94 |
| Norbornadiene   | 2 $^1A_2$    | 31.80                                               | 31.63 | 31.47 | 31.39 | 31.32 | 31.19 | 31.06 |

Table S21: . . . continued

| VTZP Basis Set |              | Dynamical Correlation $\tilde{E}^{\text{dyn}}$ [eV] |       |       |       |       |       |       |
|----------------|--------------|-----------------------------------------------------|-------|-------|-------|-------|-------|-------|
| Molecule       | State        | 0                                                   | 0.10  | 0.20  | 0.25  | 0.30  | 0.40  | 0.50  |
| Benzene        | 2 $^1A'$     | 26.74                                               | 26.37 | 26.07 | 25.93 | 25.81 | 25.57 | 25.35 |
| Benzene        | 3 $^1A'$     | 26.39                                               | 26.09 | 25.85 | 25.74 | 25.63 | 25.43 | 25.24 |
| Benzene        | 4 $^1A'$     | 27.75                                               | 27.40 | 27.10 | 26.96 | 26.83 | 26.58 | 26.35 |
| Benzene        | 5 $^1A'$     | 27.75                                               | 27.38 | 27.08 | 26.94 | 26.81 | 26.56 | 26.32 |
| Benzene        | 6 $^1A'$     | 27.33                                               | 26.73 | 26.33 | 26.17 | 26.01 | 25.74 | 25.50 |
| Benzene        | 7 $^1A'$     | 27.31                                               | 26.71 | 26.31 | 26.14 | 25.99 | 25.71 | 25.47 |
| Benzene        | 1 $^3A'$     | 25.97                                               | 25.68 | 25.44 | 25.33 | 25.23 | 25.03 | 24.84 |
| Benzene        | 2 $^3A'$     | 25.87                                               | 25.58 | 25.34 | 25.23 | 25.13 | 24.93 | 24.75 |
| Benzene        | 3 $^3A'$     | 25.87                                               | 25.57 | 25.33 | 25.22 | 25.11 | 24.91 | 24.73 |
| Benzene        | 4 $^3A'$     | 26.25                                               | 25.98 | 25.75 | 25.65 | 25.55 | 25.35 | 25.18 |
| Naphthalene    | 1 $^1B_{3u}$ | 39.84                                               | 39.56 | 39.34 | 39.24 | 39.14 | 38.96 | 38.78 |
| Naphthalene    | 1 $^1B_{2u}$ | 41.77                                               | 41.48 | 41.26 | 41.15 | 41.05 | 40.86 | 40.68 |
| Naphthalene    | 2 $^1A_g$    | 40.04                                               | 39.65 | 39.36 | 39.23 | 39.11 | 38.87 | 38.65 |
| Naphthalene    | 1 $^1B_{1g}$ | 40.69                                               | 40.24 | 39.95 | 39.82 | 39.69 | 39.46 | 39.24 |
| Naphthalene    | 2 $^1B_{3u}$ | 42.45                                               | 41.98 | 41.63 | 41.49 | 41.40 | 41.05 | 40.80 |
| Naphthalene    | 2 $^1B_{2u}$ | 41.87                                               | 41.56 | 41.29 | 41.17 | 41.06 | 40.84 | 40.64 |
| Naphthalene    | 3 $^1A_g$    | 40.38                                               | 39.93 | 39.62 | 39.47 | 39.34 | 39.09 | 38.85 |
| Naphthalene    | 3 $^1B_{2u}$ | 42.51                                               |       | 42.35 | 41.55 | 41.40 | 41.12 | 40.87 |
| Furan          | 1 $^1B_2$    | 24.94                                               | 24.65 | 24.43 | 24.33 | 24.23 | 24.06 | 23.89 |
| Furan          | 3 $^1A_1$    | 26.02                                               | 25.42 | 25.01 | 24.83 | 24.66 | 24.36 | 24.09 |
| Furan          | 1 $^3B_2$    | 22.34                                               | 22.20 | 22.08 | 22.02 | 21.97 | 21.86 | 21.76 |
| Furan          | 1 $^3A_1$    | 22.67                                               | 22.47 | 22.30 | 22.22 | 22.15 | 22.01 | 21.88 |
| Pyrrole        | 1 $^1B_2$    | 24.11                                               | 23.78 | 23.53 | 23.42 | 23.31 | 23.11 | 22.94 |
| Pyrrole        | 3 $^1A_1$    | 24.41                                               | 23.98 | 23.66 | 23.51 | 23.38 | 23.13 | 22.91 |
| Pyrrole        | 1 $^3B_2$    | 21.87                                               | 21.73 | 21.60 | 21.54 | 21.49 | 21.38 | 21.28 |
| Pyrrole        | 1 $^3A_1$    | 22.37                                               | 22.14 | 21.96 | 21.87 | 21.79 | 21.64 | 21.50 |
| Imidazole      | 2 $^1A'$     | 25.75                                               | 25.32 | 25.02 | 24.87 | 24.79 | 24.58 | 24.39 |
| Imidazole      | 3 $^1A'$     | 23.53                                               | 23.31 | 23.07 | 22.97 | 22.88 | 22.70 | 22.53 |
| Pyridine       | 2 $^1A_1$    | 27.58                                               |       | 26.78 | 26.63 | 26.50 | 26.26 | 26.04 |
| Pyridine       | 3 $^1A_1$    | 27.01                                               |       | 26.22 | 26.07 | 25.92 | 25.65 | 25.41 |
| Pyridine       | 1 $^1B_1$    | 25.14                                               |       | 24.83 | 24.77 | 24.38 | 24.25 | 24.13 |
| Pyridine       | 1 $^1A_2$    | 25.59                                               |       | 25.26 | 25.19 | 25.47 | 25.35 | 25.24 |
| Pyridine       | 1 $^3A_1$    | 24.83                                               |       | 24.45 | 24.37 | 24.30 | 24.16 | 24.03 |
| Pyridine       | 1 $^3B_2$    | 25.94                                               |       | 25.31 | 25.20 | 25.10 | 24.91 | 24.75 |
| Pyrazine       | 1 $^1B_{2u}$ | 26.27                                               | 25.98 | 25.76 | 25.67 | 25.57 | 25.40 | 25.24 |
| Pyrazine       | 1 $^1B_{1u}$ | 27.86                                               | 27.59 | 27.36 | 27.25 | 27.15 | 26.96 | 26.78 |
| Pyrazine       | 2 $^1B_{1u}$ | 28.99                                               | 28.60 | 28.29 | 28.15 | 28.02 | 27.77 | 27.54 |
| Pyrazine       | 2 $^1B_{2u}$ | 28.67                                               | 28.30 | 28.00 | 27.86 | 27.73 | 27.48 | 27.25 |

Table S21: . . . continued

| VTZP Basis Set |              | Dynamical Correlation $\tilde{E}^{\text{dyn}}$ [eV] |       |       |       |       |       |       |
|----------------|--------------|-----------------------------------------------------|-------|-------|-------|-------|-------|-------|
| Molecule       | State        | 0                                                   | 0.10  | 0.20  | 0.25  | 0.30  | 0.40  | 0.50  |
| Pyrazine       | 1 $^1B_{3u}$ | 26.73                                               | 26.50 | 26.31 | 26.23 | 26.15 | 25.99 | 25.84 |
| Pyrazine       | 1 $^1B_{2g}$ | 26.12                                               | 25.89 | 25.71 | 25.63 | 25.55 | 25.39 | 25.24 |
| Pyrazine       | 1 $^1B_{1g}$ | 27.60                                               | 27.00 | 26.71 | 26.58 | 26.46 | 26.24 | 26.03 |
| Pyrimidine     | 1 $^1B_2$    |                                                     | 25.83 | 25.62 | 25.52 | 25.43 | 25.26 | 25.11 |
| Pyrimidine     | 2 $^1A_1$    |                                                     | 27.66 | 27.41 | 27.31 | 27.20 | 27.01 | 26.83 |
| Pyrimidine     | 3 $^1A_1$    |                                                     | 28.97 | 28.64 | 28.50 | 28.36 | 28.10 | 27.86 |
| Pyrimidine     | 2 $^1B_2$    |                                                     | 28.99 | 28.61 | 28.44 | 28.28 | 27.98 | 27.71 |
| Pyrimidine     | 1 $^1B_1$    |                                                     | 26.20 | 26.04 | 25.96 | 25.89 | 25.75 | 25.61 |
| Pyrimidine     | 1 $^1A_2$    |                                                     | 26.56 | 26.38 | 26.29 | 26.21 | 26.06 | 25.91 |
| Pyridazine     | 2 $^1A_1$    | 26.02                                               | 25.78 | 25.58 | 25.49 | 25.40 | 25.23 | 25.07 |
| Pyridazine     | 1 $^1B_2$    | 28.24                                               | 27.80 | 27.51 | 27.38 | 27.25 | 27.02 | 26.81 |
| Pyridazine     | 2 $^1B_2$    | 29.00                                               | 28.52 | 28.16 | 28.01 | 27.86 | 27.59 | 27.35 |
| Pyridazine     | 3 $^1A_1$    | 29.14                                               | 28.67 | 28.32 | 28.16 | 28.01 | 27.74 | 27.50 |
| Pyridazine     | 1 $^1B_1$    | 26.90                                               | 26.67 | 26.49 | 26.40 | 26.32 | 26.17 | 26.03 |
| Pyridazine     | 2 $^1A_2$    | 26.71                                               | 26.44 | 26.23 | 26.14 | 26.04 | 25.86 | 25.70 |
| Pyridazine     | 2 $^1B_1$    | 26.96                                               | 26.64 | 26.41 | 26.30 | 26.20 | 26.01 | 25.83 |
| Triazine       | 2 $^1A'$     | 26.64                                               | 26.42 | 26.23 | 26.15 | 26.06 | 25.90 | 25.75 |
| Triazine       | 3 $^1A'$     | 28.93                                               | 28.49 | 28.23 | 28.11 | 28.00 | 27.80 | 27.61 |
| Triazine       | 4 $^1A'$     | 30.70                                               | 30.21 | 29.86 | 29.70 | 29.55 | 29.27 | 29.01 |
| Triazine       | 2 $^1A''$    | 28.12                                               | 27.71 | 27.45 | 27.34 | 27.26 | 27.03 | 26.84 |
| Triazine       | 3 $^1A''$    | 27.98                                               | 27.68 | 27.42 | 27.31 | 27.20 | 26.98 | 26.79 |
| Triazine       | 4 $^1A''$    | 27.52                                               | 27.27 | 27.02 | 26.90 | 26.80 | 26.59 | 26.39 |
| Tetrazine      | 1 $^1B_{2u}$ | 27.87                                               | 27.56 | 27.33 | 27.23 | 27.13 | 26.94 | 26.77 |
| Tetrazine      | 1 $^1B_{1u}$ | 30.47                                               | 30.09 | 29.79 | 29.65 | 29.52 | 29.28 | 29.06 |
| Tetrazine      | 2 $^1B_{1u}$ | 30.83                                               | 30.46 | 30.16 | 30.03 | 29.90 | 29.65 | 29.42 |
| Tetrazine      | 2 $^1B_{2u}$ | 29.05                                               | 28.55 | 28.22 | 28.08 | 27.94 | 27.68 | 27.45 |
| Tetrazine      | 1 $^1B_{3u}$ | 28.76                                               | 28.50 | 28.31 | 28.22 | 28.13 | 27.97 | 27.81 |
| Tetrazine      | 1 $^1A_u$    | 29.12                                               | 28.78 | 28.53 | 28.42 | 28.32 | 28.12 | 27.93 |
| Tetrazine      | 2 $^1B_{2g}$ | 28.80                                               | 28.98 | 28.12 | 27.98 | 27.85 | 27.60 | 27.37 |
| Tetrazine      | 2 $^1B_{1g}$ | 28.79                                               | 28.39 | 28.06 | 27.90 | 27.76 | 27.49 | 27.24 |
| Tetrazine      | 2 $^1B_{3u}$ | 28.96                                               | 28.58 | 28.29 | 28.16 | 28.03 | 27.80 | 27.58 |
| Tetrazine      | 1 $^3B_{3u}$ | 29.73                                               | 29.47 | 29.26 | 29.17 | 29.07 | 28.90 | 28.74 |
| Tetrazine      | 1 $^3A_u$    | 29.28                                               | 28.94 | 28.68 | 28.56 | 28.44 | 28.23 | 28.03 |
| Tetrazine      | 1 $^3B_{1g}$ | 28.65                                               | 28.34 | 28.12 | 28.01 | 27.91 | 27.73 | 27.55 |
| Formaldehyde   | 1 $^1A_2$    | 9.88                                                | 9.80  | 9.72  | 9.69  | 9.65  | 9.58  | 9.51  |
| Formaldehyde   | 1 $^3A_2$    | 9.99                                                | 9.88  | 9.78  | 9.73  | 9.69  | 9.60  | 9.53  |
| Formaldehyde   | 1 $^3A_1$    | 9.28                                                | 9.21  | 9.14  | 9.11  | 9.08  | 9.02  | 8.97  |
| Acetone        | 1 $^1A_2$    | 18.77                                               | 18.67 | 18.57 | 18.53 | 18.49 | 18.41 | 18.33 |

Table S21: . . . continued

| VTZP Basis Set |              | Dynamical Correlation $\tilde{E}^{\text{dyn}}$ [eV] |       |       |       |       |       |       |
|----------------|--------------|-----------------------------------------------------|-------|-------|-------|-------|-------|-------|
| Molecule       | State        | 0                                                   | 0.10  | 0.20  | 0.25  | 0.30  | 0.40  | 0.50  |
| Acetone        | 1 $^3A_2$    | 18.81                                               | 18.69 | 18.58 | 18.53 | 18.48 | 18.39 | 18.30 |
| Acetone        | 1 $^3A_1$    | 18.54                                               | 18.46 | 18.38 | 18.34 | 18.31 | 18.24 | 18.17 |
| Benzoquinone   | 1 $^1B_{1g}$ | 35.33                                               | 35.02 | 34.80 | 34.70 | 34.60 | 34.42 | 34.24 |
| Benzoquinone   | 1 $^1A_u$    | 35.29                                               | 34.99 | 34.77 | 34.68 | 34.58 | 34.40 | 34.23 |
| Benzoquinone   | 1 $^1B_{3g}$ | 36.62                                               | 36.24 | 35.99 | 35.88 | 35.78 | 35.58 | 35.41 |
| Benzoquinone   | 1 $^1B_{1u}$ | 37.50                                               | 37.17 | 36.92 | 36.81 | 36.71 | 36.51 | 36.33 |
| Benzoquinone   | 2 $^1B_{1u}$ | 39.92                                               | 39.39 | 38.98 | 38.79 | 39.37 | 39.12 | 38.90 |
| Benzoquinone   | 1 $^3B_{1g}$ | 35.29                                               | 34.96 | 34.72 | 34.61 | 34.51 | 34.32 | 34.13 |
| Benzoquinone   | 1 $^3A_u$    | 35.21                                               | 34.90 | 34.68 | 34.58 | 34.48 | 34.29 | 34.12 |
| Formamide      | 1 $^1A''$    | 15.62                                               | 15.54 | 15.46 | 15.42 | 15.38 | 15.31 | 15.24 |
| Formamide      | 2 $^1A'$     | 18.36                                               | 18.04 | 17.82 | 17.72 | 17.63 | 17.45 | 17.29 |
| Formamide      | 1 $^3A''$    | 15.72                                               | 15.61 | 15.52 | 15.48 | 15.44 | 15.36 | 15.28 |
| Acetamide      | 1 $^1A''$    | 20.41                                               | 20.33 | 20.24 | 20.20 | 20.16 | 20.09 | 20.01 |
| Acetamide      | 2 $^1A'$     |                                                     | 23.11 | 22.78 | 22.67 | 22.56 | 22.38 | 22.21 |
| Acetamide      | 3 $^1A'$     | 23.49                                               | 23.48 | 23.06 | 22.93 | 22.82 | 22.61 | 22.43 |
| Propanamide    | 1 $^1A''$    | 25.20                                               | 25.11 | 25.03 | 24.99 | 24.95 | 24.87 | 24.80 |
| Propanamide    | 2 $^1A'$     | 27.42                                               | 27.23 | 27.06 | 26.99 | 26.92 | 26.78 | 26.66 |
| Propanamide    | 3 $^1A'$     | 27.78                                               | 27.60 | 27.44 | 27.36 | 27.29 | 27.16 | 27.04 |
| Cytosine       | 2 $^1A'$     | 39.44                                               | 39.20 | 39.01 | 38.93 | 38.85 | 38.70 | 38.55 |
| Cytosine       | 1 $^1A''$    | 39.02                                               | 38.79 | 38.60 | 38.52 | 38.43 | 38.28 | 38.13 |
| Cytosine       | 3 $^1A'$     | 40.08                                               | 39.73 | 39.48 | 39.36 | 39.25 | 39.05 | 38.86 |
| Cytosine       | 4 $^1A'$     | 41.08                                               | 40.63 | 40.28 | 40.14 | 40.01 | 39.76 | 39.53 |
| Cytosine       | 5 $^1A'$     | 40.43                                               | 40.04 | 39.73 | 39.60 | 39.47 | 39.24 | 39.02 |
| Thymine        | 1 $^1A''$    | 43.80                                               | 43.63 | 43.49 | 43.43 | 43.37 | 43.25 | 43.14 |
| Thymine        | 2 $^1A'$     | 45.80                                               | 45.52 | 45.31 | 45.18 | 45.08 | 44.95 | 44.77 |
| Thymine        | 3 $^1A'$     | 45.51                                               | 45.41 | 45.15 | 44.83 | 44.75 | 44.62 | 44.42 |
| Thymine        | 4 $^1A'$     |                                                     | 46.11 | 45.83 | 45.56 |       |       |       |
| Thymine        | 5 $^1A'$     |                                                     | 46.33 | 45.96 | 45.87 |       |       |       |
| Uracil         | 1 $^1A''$    | 39.06                                               | 38.80 | 38.66 | 38.60 | 38.54 | 38.42 | 38.31 |
| Uracil         | 2 $^1A'$     | 40.75                                               | 40.47 | 40.27 | 40.17 | 40.08 | 39.91 | 39.74 |
| Uracil         | 3 $^1A'$     | 40.64                                               | 40.35 | 40.14 | 40.04 | 39.95 | 39.77 | 39.60 |
| Uracil         | 4 $^1A'$     | 41.16                                               | 40.81 | 40.55 | 40.43 | 40.32 | 40.11 | 39.92 |
| Uracil         | 5 $^1A'$     | 41.32                                               | 40.91 | 40.63 | 40.50 | 40.37 | 40.14 | 39.93 |
| Adenine        | 2 $^1A'$     | 48.02                                               | 47.69 | 47.45 | 47.34 | 47.23 | 47.03 | 46.84 |
| Adenine        | 3 $^1A'$     | 46.72                                               | 46.44 | 46.18 | 46.06 | 45.95 | 45.74 | 45.55 |
| Adenine        | 1 $^1A''$    | 47.46                                               | 46.95 | 46.65 | 46.55 | 46.45 | 46.28 | 46.11 |
| Adenine        | 4 $^1A'$     | 48.84                                               | 48.35 | 47.97 | 47.82 | 47.67 | 47.39 | 47.14 |
| Adenine        | 5 $^1A'$     | 47.30                                               | 46.87 | 46.56 | 46.42 | 46.30 | 46.06 | 45.85 |

Table S21: . . . continued

| VTZP Basis Set |          | Dynamical Correlation $\tilde{E}^{\text{dyn}}$ [eV] |       |       |       |       |       |      |
|----------------|----------|-----------------------------------------------------|-------|-------|-------|-------|-------|------|
| Molecule       | State    | 0                                                   | 0.10  | 0.20  | 0.25  | 0.30  | 0.40  | 0.50 |
| Adenine        | 6 $^1A'$ | 47.31                                               | 46.95 | 46.80 | 46.66 | 46.39 | 46.15 |      |
| Adenine        | 7 $^1A'$ | 47.43                                               | 47.03 | 46.87 | 46.73 | 46.46 | 46.21 |      |

Table S22: CASPT2 approximate dynamical correlation energies  $\tilde{E}^{\text{dyn}}$  for the Thiel benchmark set obtained using the ANO-RCC-VQZP basis set and different IPEA shift parameters ( $\varepsilon = 0, 0.10, 0.20, 0.25, 0.30, 0.40,$  and  $0.50$  a.u.).

| VQZP Basis Set  |              | Dynamical Correlation $\tilde{E}^{\text{dyn}}$ [eV] |       |       |       |       |       |       |
|-----------------|--------------|-----------------------------------------------------|-------|-------|-------|-------|-------|-------|
| Molecule        | State        | 0                                                   | 0.10  | 0.20  | 0.25  | 0.30  | 0.40  | 0.50  |
| Ethene          | 1 $^1B_{1u}$ | 9.92                                                | 9.80  | 9.69  | 9.63  | 9.58  | 9.49  | 9.40  |
| Ethene          | 1 $^3B_{1u}$ | 8.90                                                | 8.82  | 8.74  | 8.71  | 8.67  | 8.61  | 8.55  |
| Butadiene       | 1 $^1B_u$    | 20.07                                               | 19.85 | 19.65 | 19.56 | 19.48 | 19.32 | 19.17 |
| Butadiene       | 1 $^3B_u$    | 17.64                                               | 17.50 | 17.38 | 17.32 | 17.27 | 17.16 | 17.06 |
| Butadiene       | 1 $^3A_g$    | 17.65                                               | 17.48 | 17.34 | 17.27 | 17.20 | 17.08 | 16.96 |
| Hexatriene      | 1 $^1B_u$    | 28.66                                               | 28.45 | 28.13 | 28.36 | 28.14 | 27.76 | 27.64 |
| Hexatriene      | 2 $^1A_g$    | 26.67                                               | 26.31 | 26.11 | 26.02 | 25.94 | 25.78 | 25.63 |
| Hexatriene      | 1 $^3B_u$    | 26.18                                               | 25.99 | 25.86 | 25.80 | 25.74 | 25.62 | 25.52 |
| Hexatriene      | 1 $^3A_g$    | 26.21                                               | 25.99 | 25.82 | 25.74 | 25.66 | 25.52 | 25.39 |
| Octatetraene    | 2 $^1A_g$    | 34.84                                               | 34.58 | 34.40 | 34.31 | 34.22 | 34.05 | 33.90 |
| Octatetraene    | 1 $^1B_u$    | 36.96                                               | 36.69 | 36.47 | 36.37 | 36.27 | 36.10 | 35.93 |
| Octatetraene    | 2 $^1B_u$    | 35.19                                               | 34.81 | 34.55 | 34.43 | 34.31 | 34.10 | 33.91 |
| Octatetraene    | 1 $^3B_u$    | 34.53                                               | 34.31 | 34.16 | 34.09 | 34.03 | 33.90 | 33.78 |
| Octatetraene    | 1 $^3A_g$    | 34.57                                               | 34.31 | 34.13 | 34.04 | 33.96 | 33.80 | 33.66 |
| Cyclopropene    | 1 $^1B_1$    | 14.18                                               | 14.04 | 13.91 | 13.85 | 13.79 | 13.68 | 13.57 |
| Cyclopropene    | 1 $^1B_2$    | 14.98                                               | 14.81 | 14.66 | 14.58 | 14.52 | 14.38 | 14.26 |
| Cyclopropene    | 1 $^3B_2$    | 13.33                                               | 13.23 | 13.14 | 13.09 | 13.05 | 12.97 | 12.90 |
| Cyclopropene    | 1 $^3B_1$    | 13.98                                               | 13.83 | 13.69 | 13.63 | 13.56 | 13.45 | 13.34 |
| Cyclopentadiene | 1 $^1B_2$    | 24.48                                               |       | 24.08 | 24.00 | 23.91 | 23.75 | 23.60 |
| Cyclopentadiene | 2 $^1A_1$    | 23.50                                               |       | 22.82 | 22.70 | 22.59 | 22.39 | 22.21 |
| Cyclopentadiene | 3 $^1A_1$    | 25.82                                               |       | 24.98 | 24.81 | 24.66 | 24.38 | 24.12 |
| Cyclopentadiene | 1 $^3B_2$    | 22.03                                               |       | 21.74 | 21.68 | 21.62 | 21.51 | 21.40 |
| Norbornadiene   | 1 $^1A_2$    | 33.06                                               | 32.90 | 32.75 | 32.68 | 32.61 | 32.48 | 32.36 |
| Norbornadiene   | 1 $^1B_2$    | 32.58                                               | 32.41 | 32.26 | 32.19 | 32.13 | 32.00 | 31.88 |
| Norbornadiene   | 2 $^1B_2$    | 33.20                                               | 33.03 | 32.86 | 32.78 | 32.71 | 32.57 | 32.44 |
| Norbornadiene   | 2 $^1A_2$    | 33.24                                               | 33.07 | 32.91 | 32.84 | 32.77 | 32.64 | 32.52 |
| Norbornadiene   | 1 $^3A_2$    | 31.85                                               | 31.64 | 31.47 | 31.40 | 31.32 | 31.18 | 31.05 |
| Norbornadiene   | 1 $^3B_2$    | 31.76                                               | 31.55 | 31.37 | 31.04 | 31.21 | 31.06 | 30.92 |
| Benzene         | 2 $^1A'$     | 28.08                                               | 27.71 | 27.41 | 27.27 | 27.15 | 26.91 | 26.68 |

Table S22: . . . continued

| VQZP Basis Set |              | Dynamical Correlation $\tilde{E}^{\text{dyn}}$ [eV] |       |       |       |       |       |       |
|----------------|--------------|-----------------------------------------------------|-------|-------|-------|-------|-------|-------|
| Molecule       | State        | 0                                                   | 0.10  | 0.20  | 0.25  | 0.30  | 0.40  | 0.50  |
| Benzene        | 3 $^1A'$     | 27.76                                               | 27.45 | 27.20 | 27.09 | 26.98 | 26.78 | 26.59 |
| Benzene        | 4 $^1A'$     | 29.10                                               | 28.74 | 28.43 | 28.29 | 28.16 | 27.91 | 27.67 |
| Benzene        | 5 $^1A'$     | 29.10                                               | 28.73 | 28.42 | 28.27 | 28.14 | 27.88 | 27.64 |
| Benzene        | 6 $^1A'$     | 28.77                                               | 28.09 | 27.67 | 27.50 | 27.34 | 27.06 | 26.82 |
| Benzene        | 7 $^1A'$     | 28.75                                               | 28.06 | 27.64 | 27.47 | 27.32 | 27.04 | 26.79 |
| Benzene        | 1 $^3A'$     | 27.31                                               | 27.02 | 26.78 | 26.67 | 26.56 | 26.36 | 26.18 |
| Benzene        | 2 $^3A'$     | 27.21                                               | 26.91 | 26.67 | 26.56 | 26.46 | 26.26 | 26.08 |
| Benzene        | 3 $^3A'$     | 27.21                                               | 26.91 | 26.66 | 26.55 | 26.44 | 26.24 | 26.06 |
| Benzene        | 4 $^3A'$     | 27.61                                               | 27.34 | 27.10 | 26.99 | 26.89 | 26.70 | 26.52 |
| Naphthalene    | 1 $^1B_{3u}$ | 42.04                                               | 41.75 | 41.53 | 41.43 | 41.33 | 41.14 | 40.96 |
| Naphthalene    | 1 $^1B_{2u}$ | 44.00                                               | 43.71 | 43.47 | 43.36 | 43.26 |       | 42.89 |
| Naphthalene    | 2 $^1A_g$    | 43.28                                               | 42.11 | 41.71 | 41.54 | 41.40 | 41.13 | 40.88 |
| Naphthalene    | 1 $^1B_{1g}$ | 43.03                                               | 42.54 | 42.22 | 42.08 | 41.95 | 41.70 | 41.47 |
| Naphthalene    | 2 $^1B_{3u}$ | 44.78                                               | 44.29 | 43.88 | 43.72 | 43.55 | 43.29 | 43.02 |
| Naphthalene    | 2 $^1B_{2u}$ | 44.08                                               | 43.79 | 43.53 | 43.40 | 43.28 | 43.06 |       |
| Naphthalene    | 3 $^1A_g$    | 43.26                                               | 42.33 | 41.92 | 41.75 | 42.67 | 42.45 | 42.26 |
| Furan          | 1 $^1B_2$    | 26.50                                               | 26.17 | 26.03 | 25.90 | 25.74 | 25.54 | 25.36 |
| Furan          | 3 $^1A_1$    |                                                     | 23.69 | 23.18 | 22.96 | 22.77 | 22.42 | 22.12 |
| Furan          | 1 $^3B_2$    | 23.71                                               | 23.57 | 23.45 | 23.39 | 23.34 | 23.23 | 23.13 |
| Furan          | 1 $^3A_1$    | 24.06                                               | 23.85 | 23.68 | 23.60 | 23.52 | 23.38 | 23.25 |
| Pyrrole        | 1 $^1B_2$    | 25.73                                               | 25.25 | 25.00 | 24.83 | 24.69 | 24.47 | 24.26 |
| Pyrrole        | 3 $^1A_1$    | 26.02                                               | 25.46 | 25.07 | 24.90 | 24.75 | 24.47 | 24.22 |
| Pyrrole        | 1 $^3B_2$    | 23.10                                               | 22.95 | 22.82 | 22.76 | 22.70 | 22.60 | 22.49 |
| Pyrrole        | 1 $^3A_1$    | 23.61                                               | 23.38 | 23.19 | 23.10 | 23.02 | 22.86 | 22.71 |
| Pyridine       | 2 $^1A_1$    |                                                     | 28.54 | 28.22 | 28.00 | 27.98 | 27.72 | 27.49 |
| Pyridine       | 3 $^1A_1$    |                                                     | 29.21 | 28.86 | 29.07 | 28.55 | 28.27 | 28.02 |
| Pyridine       | 1 $^1B_1$    |                                                     | 26.38 | 26.24 | 26.17 | 25.77 | 25.64 | 25.52 |
| Pyridine       | 1 $^1A_2$    |                                                     | 26.81 | 26.66 | 26.59 | 26.87 | 26.76 | 26.64 |
| Pyridine       | 1 $^3A_1$    |                                                     | 26.03 | 25.86 | 25.78 | 25.71 | 25.56 | 25.43 |
| Pyridine       | 1 $^3B_2$    |                                                     | 26.87 | 26.72 | 26.65 |       | 26.35 | 26.18 |
| Pyrazine       | 1 $^1B_{2u}$ | 27.96                                               | 27.56 | 27.31 | 27.21 | 27.11 | 26.92 | 26.75 |
| Pyrazine       | 1 $^1B_{1u}$ | 29.37                                               | 29.09 | 28.86 | 28.75 | 28.65 | 28.46 | 28.28 |
| Pyrazine       | 2 $^1B_{1u}$ | 30.55                                               | 30.14 | 29.83 | 29.68 | 29.55 | 29.29 | 29.06 |
| Pyrazine       | 2 $^1B_{2u}$ | 30.26                                               | 29.87 | 29.55 | 29.40 | 29.26 | 29.00 | 28.77 |
| Pyrazine       | 1 $^1B_{3u}$ | 28.24                                               | 28.00 | 27.81 | 27.72 | 27.64 | 27.48 | 27.33 |
| Pyrazine       | 1 $^1B_{2g}$ | 27.62                                               | 27.39 | 27.20 | 27.12 | 27.04 | 26.88 | 26.73 |
| Pyrazine       | 1 $^1B_{1g}$ | 28.91                                               | 28.51 | 28.22 | 28.08 | 27.96 | 27.73 | 27.52 |
| Pyrimidine     | 1 $^1B_2$    | 27.60                                               | 27.35 | 27.14 | 27.05 | 26.96 | 26.79 | 26.63 |

Table S22: . . . continued

| VQZP Basis Set |              | Dynamical Correlation $\tilde{E}^{\text{dyn}}$ [eV] |       |       |       |       |       |       |
|----------------|--------------|-----------------------------------------------------|-------|-------|-------|-------|-------|-------|
| Molecule       | State        | 0                                                   | 0.10  | 0.20  | 0.25  | 0.30  | 0.40  | 0.50  |
| Pyrimidine     | 2 $^1A_1$    | 29.69                                               | 29.21 | 28.96 | 28.84 | 28.74 | 28.54 | 28.36 |
| Pyrimidine     | 3 $^1A_1$    | 29.99                                               | 29.47 | 29.09 | 28.93 | 28.78 | 28.50 | 28.25 |
| Pyrimidine     | 2 $^1B_2$    | 30.54                                               | 30.14 | 29.81 | 29.67 | 29.53 | 29.27 | 29.03 |
| Pyrimidine     | 1 $^1B_1$    | 27.91                                               | 27.70 | 27.53 | 27.45 | 27.38 | 27.23 | 27.10 |
| Pyrimidine     | 1 $^1A_2$    | 28.27                                               | 28.05 | 27.86 | 27.78 | 27.70 | 27.54 | 27.39 |
| Pyridazine     | 2 $^1A_1$    | 27.55                                               | 27.29 | 27.09 | 26.99 | 26.90 | 26.72 | 26.56 |
| Pyridazine     | 1 $^1B_2$    | 29.82                                               | 29.40 | 29.08 | 28.95 | 28.82 | 28.58 | 28.37 |
| Pyridazine     | 2 $^1B_2$    | 30.56                                               | 30.10 | 29.70 | 29.54 | 29.39 | 29.11 | 28.85 |
| Pyridazine     | 3 $^1A_1$    | 30.60                                               | 30.24 | 30.07 | 29.72 | 29.56 | 29.28 | 29.03 |
| Pyridazine     | 1 $^1B_1$    | 28.41                                               | 28.17 | 27.98 | 27.90 | 27.82 | 27.66 | 27.51 |
| Pyridazine     | 2 $^1A_2$    | 28.21                                               | 27.94 | 27.72 | 27.63 | 27.53 | 27.35 | 27.18 |
| Pyridazine     | 2 $^1B_1$    | 28.51                                               | 28.14 | 27.90 | 27.79 | 27.69 | 27.50 | 27.32 |
| Triazine       | 2 $^1A'$     | 28.18                                               | 27.95 | 27.76 | 27.67 | 27.59 | 27.43 | 27.28 |
| Triazine       | 3 $^1A'$     |                                                     | 31.81 | 31.53 |       |       |       |       |
| Triazine       | 2 $^1A''$    |                                                     | 29.29 | 29.03 | 28.92 | 28.81 | 28.60 | 28.41 |
| Triazine       | 3 $^1A''$    |                                                     | 29.27 | 29.01 | 28.89 | 28.77 | 28.56 | 28.36 |
| Triazine       | 4 $^1A''$    |                                                     | 28.84 | 28.59 | 28.47 | 28.36 | 28.15 | 27.95 |
| Tetrazine      | 1 $^1B_{2u}$ | 29.54                                               | 29.22 | 28.99 | 28.88 | 28.78 | 28.58 | 28.41 |
| Tetrazine      | 1 $^1B_{1u}$ | 33.07                                               | 32.67 | 32.36 | 32.23 | 32.09 | 31.85 | 31.62 |
| Tetrazine      | 2 $^1B_{1u}$ | 31.57                                               | 31.20 | 30.91 | 30.77 | 30.64 | 30.39 | 30.16 |
| Tetrazine      | 2 $^1B_{2u}$ | 30.70                                               | 30.22 | 29.89 | 29.74 | 29.60 | 29.34 | 29.10 |
| Tetrazine      | 1 $^1B_{3u}$ | 30.40                                               | 30.15 | 29.95 | 29.86 | 29.77 | 29.60 | 29.44 |
| Tetrazine      | 1 $^1A_u$    | 30.76                                               | 30.42 | 30.17 | 30.06 | 29.95 | 29.75 | 29.56 |
| Tetrazine      | 2 $^1B_{2g}$ | 30.45                                               | 30.06 | 29.75 | 29.61 | 29.48 | 29.22 | 28.99 |
| Tetrazine      | 2 $^1B_{1g}$ | 30.48                                               | 30.05 | 29.71 | 29.56 | 29.41 | 29.13 | 28.88 |
| Tetrazine      | 2 $^1B_{3u}$ | 30.61                                               | 30.30 | 29.93 | 29.79 | 29.67 | 29.42 | 29.20 |
| Tetrazine      | 1 $^3B_{3u}$ | 31.36                                               | 31.10 | 30.89 | 30.79 | 30.70 | 30.52 | 30.36 |
| Tetrazine      | 1 $^3A_u$    | 30.91                                               | 30.56 | 30.30 | 30.18 | 30.06 | 29.85 | 29.64 |
| Tetrazine      | 1 $^3B_{1g}$ | 30.29                                               | 29.98 | 29.75 | 29.64 | 29.54 | 29.35 | 29.17 |
| Formaldehyde   | 1 $^1A_2$    | 10.59                                               | 10.51 | 10.43 | 10.39 | 10.35 | 10.28 | 10.22 |
| Formaldehyde   | 1 $^3A_2$    | 10.69                                               | 10.58 | 10.48 | 10.43 | 10.39 | 10.30 | 10.22 |
| Formaldehyde   | 1 $^3A_1$    | 9.97                                                | 9.90  | 9.83  | 9.80  | 9.77  | 9.71  | 9.66  |
| Acetone        | 1 $^1A_2$    | 19.96                                               | 19.86 | 19.76 | 19.72 | 19.68 | 19.59 | 19.52 |
| Acetone        | 1 $^3A_2$    | 20.00                                               | 19.88 | 19.77 | 19.72 | 19.67 | 19.57 | 19.48 |
| Acetone        | 1 $^3A_1$    | 19.73                                               | 19.64 | 19.56 | 19.52 | 19.49 | 19.42 | 19.35 |
| Benzoquinone   | 1 $^1B_{1g}$ | 37.56                                               | 37.25 | 37.02 | 36.92 | 36.82 | 36.63 | 36.45 |
| Benzoquinone   | 1 $^1A_u$    | 37.50                                               | 37.21 | 36.99 | 36.89 | 36.80 | 36.61 | 36.43 |
| Benzoquinone   | 1 $^1B_{3g}$ | 38.89                                               | 38.50 | 38.25 | 38.14 | 38.03 | 37.84 | 37.65 |

Table S22: . . . continued

| VQZP Basis Set |              | Dynamical Correlation $\tilde{E}^{\text{dyn}}$ [eV] |       |       |       |       |       |       |
|----------------|--------------|-----------------------------------------------------|-------|-------|-------|-------|-------|-------|
| Molecule       | State        | 0                                                   | 0.10  | 0.20  | 0.25  | 0.30  | 0.40  | 0.50  |
| Benzoquinone   | 1 $^1B_{1u}$ | 39.64                                               | 39.28 | 39.06 | 38.94 | 38.83 | 38.63 | 38.45 |
| Benzoquinone   | 1 $^3B_{1g}$ | 37.51                                               | 37.17 | 36.93 | 36.82 | 36.72 | 36.53 | 36.34 |
| Benzoquinone   | 1 $^3A_u$    | 37.43                                               | 37.12 | 36.89 | 36.79 | 36.69 | 36.50 | 36.32 |
| Formamide      | 1 $^1A''$    | 16.66                                               | 16.57 | 16.49 | 16.45 | 16.41 | 16.34 | 16.27 |
| Formamide      | 2 $^1A'$     | 19.43                                               | 19.10 | 18.88 | 18.77 | 18.68 | 18.50 | 18.33 |
| Formamide      | 1 $^3A''$    | 16.79                                               | 16.69 | 16.59 | 16.55 | 16.51 | 16.43 | 16.36 |
| Acetamide      | 1 $^1A''$    | 21.69                                               |       | 21.52 | 21.48 | 21.44 | 21.36 | 21.28 |
| Acetamide      | 2 $^1A'$     | 23.64                                               |       | 24.10 | 23.98 | 23.87 | 23.67 | 23.50 |
| Acetamide      | 3 $^1A'$     | 24.93                                               |       | 24.37 | 24.23 | 24.11 | 23.90 | 23.71 |
| Propanamide    | 1 $^1A''$    | 26.72                                               | 26.63 | 26.54 | 26.50 | 26.46 | 26.38 | 26.31 |
| Propanamide    | 2 $^1A'$     | 28.74                                               | 28.56 | 28.40 | 28.32 | 28.26 | 28.12 | 28.00 |
| Propanamide    | 3 $^1A'$     | 29.18                                               | 28.99 | 28.84 | 28.76 | 28.70 | 28.57 | 28.45 |
| Cytosine       | 2 $^1A'$     | 41.63                                               |       | 41.34 | 41.25 | 41.16 | 41.01 | 40.86 |
| Cytosine       | 1 $^1A''$    | 41.33                                               |       | 40.90 | 40.73 | 40.73 | 40.57 | 40.42 |
| Cytosine       | 3 $^1A'$     | 42.41                                               |       | 41.84 | 41.72 | 41.60 | 41.39 | 41.18 |
| Cytosine       | 4 $^1A'$     | 43.22                                               |       | 42.82 | 42.63 | 42.47 | 42.22 | 41.94 |
| Cytosine       | 5 $^1A'$     | 42.87                                               |       | 42.19 | 42.03 | 41.90 | 41.64 | 41.40 |
| Thymine        | 1 $^1A''$    | 46.49                                               | 46.31 | 46.17 | 46.11 | 46.05 | 45.93 | 45.82 |
| Thymine        | 2 $^1A'$     | 48.67                                               | 48.22 | 47.97 | 47.83 | 47.86 | 47.65 | 47.47 |
| Thymine        | 3 $^1A'$     | 48.42                                               | 48.28 | 47.70 | 47.56 | 47.57 | 47.32 | 47.11 |
| Thymine        | 4 $^1A'$     | 49.13                                               | 48.57 | 48.22 |       |       |       |       |
| Thymine        | 5 $^1A'$     | 49.24                                               |       | 48.38 | 48.25 | 48.22 | 48.03 | 47.64 |
| Uracil         | 1 $^1A''$    | 41.44                                               | 41.24 | 41.10 | 41.03 | 40.97 | 40.85 | 40.74 |
| Uracil         | 2 $^1A'$     | 43.23                                               | 42.94 | 42.73 | 42.63 | 42.54 | 42.36 | 42.19 |
| Uracil         | 3 $^1A'$     | 43.14                                               | 42.82 | 42.60 | 42.49 | 42.40 | 42.21 | 42.04 |
| Uracil         | 4 $^1A'$     | 43.74                                               | 43.36 | 43.09 | 42.96 | 42.84 | 42.62 | 42.42 |
| Uracil         | 5 $^1A'$     | 43.90                                               | 43.45 | 43.14 | 43.00 | 42.87 | 42.63 | 42.41 |
| Adenine        | 2 $^1A'$     |                                                     |       | 50.14 | 50.02 | 49.91 | 49.70 |       |
| Adenine        | 3 $^1A'$     |                                                     |       | 48.88 | 48.75 | 48.64 | 48.41 |       |

### S3.7 Comparison to other Computational Results

In Table S24 we present the excitation energies for the molecules of the Thiel benchmark set obtained at various levels of theory using the TZVP basis set: NEVPT2 (partially and strongly contracted [PC, SC]),<sup>56</sup> coupled cluster (CCSD and CC3),<sup>51</sup> TD-DFT (BP86, B3LYP,

Table S23: Mean signed errors (MSEE) in eV of CASPT2 vertical excitation energies compared to experimental reference data for different ANO-RCC basis sets and IPEA shift values  $\varepsilon$ . MSEE computed as  $\text{MSEE} = \sum_{i=1}^{N_{\text{States}}} (V_i^{\text{calc}} - V_i^{\text{exp}}) / N_{\text{States}}$

| <b>Basis Set</b> | <b>IPEA Shift <math>\varepsilon</math> [a.u.]</b> |             |             |             |             |             |             |
|------------------|---------------------------------------------------|-------------|-------------|-------------|-------------|-------------|-------------|
| <b>ANO-RCC</b>   | <b>0</b>                                          | <b>0.10</b> | <b>0.20</b> | <b>0.25</b> | <b>0.30</b> | <b>0.40</b> | <b>0.50</b> |
| MB               | 0.85                                              | 0.95        | 1.02        | 1.05        | 1.08        | 1.13        | 1.18        |
| VDZ              | 0.18                                              | 0.34        | 0.46        | 0.52        | 0.56        | 0.66        | 0.74        |
| VDZP             | -0.13                                             | 0.09        | 0.25        | 0.32        | 0.38        | 0.51        | 0.63        |
| VTZP             | -0.29                                             | -0.10       | 0.08        | 0.18        | 0.27        | 0.41        | 0.54        |
| VQZP             | -0.34                                             | -0.08       | 0.07        | 0.15        | 0.20        | 0.34        | 0.46        |

and BHLYP),<sup>57</sup> DFT/MRCI (BHLYP),<sup>57</sup> and ADC [ADC(2)-s, ADC(3)].<sup>58</sup> In Table S25 we show the mean signed and unsigned errors of the excitation energies compared to experimental reference data (see also Figure 12 in the main paper).

Table S24: Vertical excitation energies in eV at various levels of theory computed using the TVZP basis set for the 28 organic molecules of the Thiel benchmark set.

| TZVP Basis Set  |                                | NEVPT2 |      | CC   |      | TDDFT |       | DFT/  |      | ADC      |        |
|-----------------|--------------------------------|--------|------|------|------|-------|-------|-------|------|----------|--------|
| Molecule        | State                          | PC     | SC   | CCSD | CC3  | BP86  | B3LYP | BHLYP | MRCI | ADC(2)-s | ADC(3) |
| Ethene          | 1 <sup>1</sup> B <sub>1u</sub> | 8.64   | 8.69 | 8.51 | 8.37 | 7.73  | 7.70  | 7.69  | 7.96 | 8.36     | 8.14   |
| Ethene          | 1 <sup>3</sup> B <sub>1u</sub> | 4.60   | 4.60 | 4.42 | 4.48 | 4.15  | 4.03  | 3.47  | 4.31 | 4.52     | 4.23   |
| Butadiene       | 1 <sup>1</sup> B <sub>u</sub>  | 6.80   | 6.82 | 6.72 | 6.58 | 5.60  | 5.74  | 5.94  | 6.02 | 6.43     | 6.36   |
| Butadiene       | 2 <sup>1</sup> A <sub>g</sub>  | 5.56   | 5.59 | 7.42 | 6.77 | 6.30  | 6.82  | 7.61  | 6.18 | 7.68     | 5.77   |
| Butadiene       | 1 <sup>3</sup> B <sub>u</sub>  | 3.38   | 3.39 | 3.25 | 3.32 | 2.87  | 2.76  | 2.15  | 3.09 | 3.40     | 3.03   |
| Butadiene       | 1 <sup>3</sup> A <sub>g</sub>  | 5.27   | 5.28 | 5.15 | 5.17 | 4.95  | 4.86  | 4.44  | 4.85 | 5.22     | 4.89   |
| Hexatriene      | 1 <sup>1</sup> B <sub>u</sub>  | 4.84   | 4.96 | 5.72 | 5.58 | 4.50  | 4.69  | 4.93  | 4.95 | 5.35     | 5.35   |
| Hexatriene      | 2 <sup>1</sup> A <sub>g</sub>  | 5.56   | 5.59 | 6.61 | 5.72 | 5.07  | 5.69  | 6.66  | 4.92 | 6.72     | 4.52   |
| Hexatriene      | 1 <sup>3</sup> B <sub>u</sub>  | 2.73   | 2.74 | 2.62 | 2.69 | 2.21  | 2.09  | 1.35  | 2.45 | 2.79     | 2.38   |
| Hexatriene      | 1 <sup>3</sup> A <sub>g</sub>  | 4.39   | 4.40 | 4.28 | 4.32 | 3.98  | 3.92  | 3.50  | 3.96 | 4.38     | 4.00   |
| Octatetraene    | 2 <sup>1</sup> A <sub>g</sub>  | 4.72   | 4.74 | 5.99 | 4.97 | 4.19  | 4.84  | 5.83  | 4.01 | 5.93     | 3.73   |
| Octatetraene    | 1 <sup>1</sup> B <sub>u</sub>  | 4.04   | 4.17 | 5.07 | 4.94 | 3.82  | 4.02  | 4.29  | 4.25 | 4.66     | 4.70   |
| Octatetraene    | 2 <sup>1</sup> B <sub>u</sub>  | 5.86   | 5.89 |      |      |       |       |       |      |          |        |
| Octatetraene    | 3 <sup>1</sup> A <sub>g</sub>  | 5.97   | 6.24 |      |      |       |       |       |      |          |        |
| Octatetraene    | 4 <sup>1</sup> A <sub>g</sub>  | 6.67   | 6.71 |      |      |       |       |       |      |          |        |
| Octatetraene    | 3 <sup>1</sup> B <sub>u</sub>  | 8.35   | 8.40 |      |      |       |       |       |      |          |        |
| Octatetraene    | 1 <sup>3</sup> B <sub>u</sub>  | 2.32   | 2.33 | 2.23 | 2.30 | 1.81  | 1.68  | 0.72  | 2.04 | 2.41     | 1.97   |
| Octatetraene    | 1 <sup>3</sup> A <sub>g</sub>  | 3.72   | 3.73 | 3.62 | 3.67 | 3.30  | 3.24  | 2.80  | 3.32 | 3.74     | 3.33   |
| Cyclopropene    | 1 <sup>1</sup> B <sub>1</sub>  | 6.85   | 6.85 | 6.96 | 6.90 | 6.30  | 6.46  | 6.77  | 6.73 | 6.97     | 6.75   |
| Cyclopropene    | 1 <sup>1</sup> B <sub>2</sub>  | 7.07   | 7.18 | 7.24 | 7.10 | 6.13  | 6.31  | 6.50  | 6.74 | 7.14     | 6.91   |
| Cyclopropene    | 1 <sup>3</sup> B <sub>2</sub>  | 4.54   | 4.56 | 4.30 | 4.34 | 3.74  | 3.70  | 3.25  | 4.03 | 4.43     | 4.08   |
| Cyclopropene    | 1 <sup>3</sup> B <sub>1</sub>  | 6.58   | 6.58 | 6.66 | 6.62 | 5.81  | 6.01  | 6.28  | 6.31 | 6.66     | 6.45   |
| Cyclopentadiene | 1 <sup>1</sup> B <sub>2</sub>  | 5.21   | 5.30 | 5.87 | 5.73 | 4.93  | 5.02  | 5.15  | 5.42 | 5.66     | 5.52   |

Table S24: . . . continued

| TZVP Basis Set  |                                | NEVPT2 |      | CC   |      | TDDFT |       | DFT/  |      | ADC      |        |
|-----------------|--------------------------------|--------|------|------|------|-------|-------|-------|------|----------|--------|
| Molecule        | State                          | PC     | SC   | CCSD | CC3  | BP86  | B3LYP | BHLYP | MRCI | ADC(2)-s | ADC(3) |
| Cyclopentadiene | 2 <sup>1</sup> A <sub>1</sub>  | 6.72   | 6.74 | 7.05 | 6.61 | 6.09  | 6.52  | 7.23  | 6.15 | 7.08     | 5.81   |
| Cyclopentadiene | 3 <sup>1</sup> A <sub>1</sub>  | 8.22   | 8.51 | 8.95 | 8.69 | 8.04  | 8.15  | 8.29  | 8.16 | 8.85     | 7.79   |
| Cyclopentadiene | 1 <sup>3</sup> B <sub>2</sub>  | 3.32   | 3.33 | 3.18 | 3.25 | 2.82  | 2.71  | 2.14  | 3.07 | 3.35     | 2.97   |
| Cyclopentadiene | 1 <sup>3</sup> A <sub>1</sub>  |        |      | 5.07 | 5.09 | 4.82  | 4.75  | 4.38  | 4.78 | 5.19     | 4.83   |
| Norbornadiene   | 1 <sup>1</sup> A <sub>2</sub>  | 5.04   | 5.07 | 5.80 | 5.64 | 4.48  | 4.79  | 5.15  | 5.30 | 5.57     | 5.48   |
| Norbornadiene   | 1 <sup>1</sup> B <sub>2</sub>  | 5.79   | 5.84 | 6.69 | 6.49 | 5.02  | 5.52  | 6.22  | 6.12 | 5.70     | 6.45   |
| Norbornadiene   | 2 <sup>1</sup> B <sub>2</sub>  | 6.97   | 7.10 | 7.87 | 7.64 | 6.61  | 6.87  | 7.21  | 7.21 | 7.63     | 7.54   |
| Norbornadiene   | 2 <sup>1</sup> A <sub>2</sub>  | 7.03   | 7.07 | 7.87 | 7.71 | 6.56  | 6.86  | 7.40  | 7.33 | 7.67     | 7.63   |
| Norbornadiene   | 1 <sup>3</sup> A <sub>2</sub>  | 3.79   | 3.81 | 3.67 | 3.72 | 3.11  | 3.08  | 2.63  | 3.42 | 3.74     | 3.46   |
| Norbornadiene   | 1 <sup>3</sup> B <sub>2</sub>  | 4.30   | 4.31 | 4.09 | 4.16 | 3.71  | 3.62  | 3.07  | 3.85 | 4.24     | 3.91   |
| Benzene         | 2 <sup>1</sup> A'              | 5.21   | 5.24 | 5.19 | 5.07 | 5.24  | 5.40  | 5.64  | 5.04 | 5.27     | 4.99   |
| Benzene         | 3 <sup>1</sup> A'              | 6.40   | 6.47 | 6.74 | 6.68 | 6.00  | 6.10  | 6.15  | 6.31 | 6.64     | 6.47   |
| Benzene         | 4 <sup>1</sup> A'              | 7.11   | 7.28 | 7.65 | 7.45 | 6.96  | 7.07  | 7.27  | 7.19 | 7.43     | 7.35   |
| Benzene         | 5 <sup>1</sup> A'              | 7.11   | 7.28 | 7.65 | 7.45 | 6.96  | 7.07  | 7.27  | 7.19 | 7.43     | 7.35   |
| Benzene         | 6 <sup>1</sup> A'              | 8.42   | 8.45 | 9.21 | 8.43 | 8.28  | 8.91  | 9.70  | 7.51 | 9.06     | 8.58   |
| Benzene         | 7 <sup>1</sup> A'              | 8.42   | 8.45 | 9.21 | 8.43 | 8.28  | 8.91  | 9.70  | 7.51 | 9.06     | 8.58   |
| Benzene         | 1 <sup>3</sup> A'              | 4.32   | 4.33 | 3.94 | 4.12 | 3.93  | 3.77  | 3.08  | 4.13 | 4.30     | 3.88   |
| Benzene         | 2 <sup>3</sup> A'              | 4.98   | 5.00 | 4.97 | 4.90 | 4.60  | 4.70  | 4.79  | 4.69 | 5.13     | 4.62   |
| Benzene         | 3 <sup>3</sup> A'              | 4.98   | 5.00 | 4.97 | 4.90 | 4.60  | 4.70  | 4.79  | 4.69 | 5.13     | 4.62   |
| Benzene         | 4 <sup>3</sup> A'              | 5.47   | 5.54 | 6.00 | 6.04 | 4.94  | 5.09  | 5.26  | 5.57 | 6.05     | 5.73   |
| Naphthalene     | 1 <sup>1</sup> B <sub>3u</sub> | 4.37   | 4.39 | 4.41 | 4.27 | 4.23  | 4.44  | 4.71  | 4.10 | 4.45     | 4.14   |
| Naphthalene     | 1 <sup>1</sup> B <sub>2u</sub> | 4.37   | 4.47 | 5.21 | 5.03 | 4.08  | 4.35  | 4.65  | 4.60 | 4.93     | 4.90   |
| Naphthalene     | 2 <sup>1</sup> A <sub>g</sub>  | 6.23   | 6.27 | 6.23 | 5.98 | 5.85  | 6.18  | 6.63  | 5.65 | 6.22     | 5.54   |
| Naphthalene     | 1 <sup>1</sup> B <sub>1g</sub> | 6.15   | 6.20 | 6.53 | 6.07 | 5.04  | 5.58  | 6.28  | 5.53 | 6.23     | 6.06   |

Table S24: . . . continued

| TZVP Basis Set |                                | NEVPT2 |      | CC   |      | TDDFT |       | DFT/  |      | ADC      |        |
|----------------|--------------------------------|--------|------|------|------|-------|-------|-------|------|----------|--------|
| Molecule       | State                          | PC     | SC   | CCSD | CC3  | BP86  | B3LYP | BHLYP | MRCI | ADC(2)-s | ADC(3) |
| Naphthalene    | 2 <sup>1</sup> B <sub>3u</sub> | 5.61   | 5.85 | 6.55 | 6.33 | 5.73  | 5.93  | 6.21  | 5.89 | 6.23     | 6.26   |
| Naphthalene    | 2 <sup>1</sup> B <sub>1g</sub> | 6.22   | 6.41 | 6.97 | 6.79 | 6.17  | 6.32  | 6.65  | 6.26 | 6.22     | 6.63   |
| Naphthalene    | 2 <sup>1</sup> B <sub>2u</sub> | 6.01   | 6.17 | 6.77 | 6.57 | 5.88  | 6.12  | 6.41  | 6.21 | 6.55     | 6.47   |
| Naphthalene    | 3 <sup>1</sup> A <sub>g</sub>  | 6.85   | 6.90 | 7.77 | 6.90 | 6.20  | 6.85  | 7.70  | 6.05 | 7.38     | 6.41   |
| Naphthalene    | 3 <sup>1</sup> B <sub>2u</sub> | 7.81   | 8.09 | 8.77 | 8.44 | 7.53  | 7.87  | 8.45  | 7.84 |          |        |
| Naphthalene    | 3 <sup>1</sup> B <sub>3u</sub> | 7.92   | 7.98 | 9.03 | 8.12 | 8.00  | 8.65  | 9.84  | 7.38 |          |        |
| Naphthalene    | 1 <sup>3</sup> B <sub>2u</sub> |        |      | 2.99 | 3.11 | 2.76  | 2.69  | 2.06  | 2.97 | 3.26     | 2.85   |
| Naphthalene    | 1 <sup>3</sup> B <sub>3u</sub> |        |      | 4.27 | 4.18 | 3.81  | 3.95  | 4.06  | 3.93 | 4.36     | 3.90   |
| Naphthalene    | 1 <sup>3</sup> B <sub>1g</sub> |        |      | 4.44 | 4.47 | 4.19  | 4.17  | 3.90  | 4.25 | 4.63     | 4.21   |
| Naphthalene    | 2 <sup>3</sup> B <sub>2u</sub> |        |      | 4.67 | 4.64 | 4.31  | 4.40  | 4.45  | 4.49 | 4.86     | 4.37   |
| Naphthalene    | 2 <sup>3</sup> B <sub>3u</sub> |        |      | 5.10 | 5.11 | 4.03  | 4.22  | 4.42  | 4.65 | 5.08     | 4.82   |
| Naphthalene    | 1 <sup>3</sup> A <sub>g</sub>  | 5.80   | 5.95 | 5.57 | 5.52 | 5.25  | 5.33  | 5.31  | 5.18 | 5.74     | 5.24   |
| Naphthalene    | 2 <sup>3</sup> B <sub>1g</sub> | 6.11   | 6.25 | 6.79 | 6.48 | 5.00  | 5.55  | 6.39  | 6.02 | 6.45     | 6.27   |
| Naphthalene    | 2 <sup>3</sup> A <sub>g</sub>  | 6.52   | 6.56 | 6.81 | 6.47 | 5.67  | 5.95  | 6.33  | 6.00 | 6.82     | 6.16   |
| Naphthalene    | 3 <sup>3</sup> A <sub>g</sub>  |        |      | 6.96 | 6.79 | 5.59  | 6.07  | 6.58  | 6.31 | 6.94     | 6.59   |
| Naphthalene    | 3 <sup>3</sup> B <sub>1g</sub> |        |      | 7.04 | 6.76 | 6.30  | 6.56  | 6.85  | 6.41 | 7.24     | 6.49   |
| Furan          | 1 <sup>1</sup> B <sub>2</sub>  | 6.42   | 6.59 | 6.80 | 6.60 | 6.11  | 6.16  | 6.23  | 6.33 | 6.76     | 6.39   |
| Furan          | 2 <sup>1</sup> A <sub>1</sub>  | 6.75   | 6.79 | 6.89 | 6.62 | 6.38  | 6.70  | 7.22  | 6.32 | 6.85     | 6.48   |
| Furan          | 3 <sup>1</sup> A <sub>1</sub>  | 8.35   | 8.62 | 8.83 | 8.53 | 8.16  | 8.25  | 8.43  | 8.21 | 8.73     | 8.23   |
| Furan          | 1 <sup>3</sup> B <sub>2</sub>  | 4.33   | 4.36 | 4.10 | 4.17 | 3.85  | 3.71  | 2.70  | 3.91 | 4.35     | 3.84   |
| Furan          | 1 <sup>3</sup> A <sub>1</sub>  | 5.62   | 5.67 | 5.48 | 5.48 | 5.24  | 5.21  | 4.67  | 5.15 | 5.59     | 5.22   |
| Pyrrrole       | 2 <sup>1</sup> A <sub>1</sub>  | 6.56   | 6.60 | 6.61 | 6.40 | 6.26  | 6.53  | 6.94  | 6.13 | 6.60     | 6.38   |
| Pyrrrole       | 1 <sup>1</sup> B <sub>2</sub>  | 6.78   | 6.90 | 6.87 | 6.71 | 6.34  | 6.40  | 6.48  | 6.46 | 6.89     | 6.53   |
| Pyrrrole       | 3 <sup>1</sup> A <sub>1</sub>  | 8.19   | 8.44 | 8.44 | 8.17 | 7.85  | 7.96  | 8.15  | 7.88 | 8.43     | 7.92   |

Table S24: . . . continued

| TZVP Basis Set |                               | NEVPT2 |      | CC   |      | TDDFT |       | DFT/  |      | ADC      |        |
|----------------|-------------------------------|--------|------|------|------|-------|-------|-------|------|----------|--------|
| Molecule       | State                         | PC     | SC   | CCSD | CC3  | BP86  | B3LYP | BHLYP | MRCI | ADC(2)-s | ADC(3) |
| Pyrrrole       | 1 <sup>3</sup> B <sub>2</sub> | 4.73   | 4.74 | 4.41 | 4.48 | 4.18  | 4.07  | 3.63  | 4.23 | 4.66     | 4.21   |
| Pyrrrole       | 1 <sup>3</sup> A <sub>1</sub> | 5.68   | 5.70 | 5.54 | 5.51 | 5.24  | 5.25  | 5.19  | 5.19 | 5.67     | 5.26   |
| Imidazole      | 1 <sup>1</sup> A''            | 6.97   | 7.00 | 7.01 | 6.82 | 5.91  | 6.46  | 7.09  | 6.35 | 6.74     | 6.46   |
| Imidazole      | 2 <sup>1</sup> A'             | 6.80   | 6.85 | 6.80 | 6.58 | 6.29  | 6.45  | 6.65  | 6.29 | 6.73     | 6.49   |
| Imidazole      | 3 <sup>1</sup> A'             | 6.85   | 6.99 | 7.27 | 7.10 | 6.86  | 7.04  | 7.35  | 6.82 | 7.26     | 6.98   |
| Imidazole      | 2 <sup>1</sup> A''            | 8.01   | 8.06 | 8.15 | 7.93 | 7.18  | 7.45  | 8.16  | 7.63 | 7.80     | 7.72   |
| Imidazole      | 4 <sup>1</sup> A'             | 8.39   | 8.68 | 8.70 | 8.45 | 8.12  | 8.27  | 8.45  | 8.22 | 8.60     | 8.12   |
| Imidazole      | 1 <sup>3</sup> A'             |        |      | 4.62 | 4.69 | 4.33  | 4.24  | 3.82  | 4.41 | 4.86     | 4.40   |
| Imidazole      | 2 <sup>3</sup> A'             |        |      | 5.83 | 5.79 | 5.39  | 5.44  | 5.33  | 5.43 | 5.98     | 5.52   |
| Imidazole      | 1 <sup>3</sup> A''            |        |      | 6.43 | 6.37 | 5.53  | 5.83  | 6.12  | 5.92 | 6.38     | 6.26   |
| Imidazole      | 3 <sup>3</sup> A'             |        |      | 6.56 | 6.55 | 5.92  | 5.95  | 5.99  | 6.22 | 6.71     | 6.29   |
| Imidazole      | 4 <sup>3</sup> A'             |        |      | 7.54 | 7.42 | 6.76  | 6.93  | 7.21  | 7.14 | 7.60     | 7.20   |
| Imidazole      | 2 <sup>3</sup> A''            |        |      | 7.76 | 7.51 | 6.35  | 6.86  | 7.81  | 7.32 | 7.61     | 7.50   |
| Pyridine       | 1 <sup>1</sup> B <sub>2</sub> | 5.33   | 5.36 | 5.27 | 5.15 | 5.35  | 5.49  | 5.71  | 5.09 | 5.32     | 5.06   |
| Pyridine       | 2 <sup>1</sup> A <sub>1</sub> | 7.09   | 7.17 | 6.94 | 6.85 | 6.21  | 6.31  | 6.37  | 6.47 | 6.83     | 6.58   |
| Pyridine       | 3 <sup>1</sup> A <sub>1</sub> | 7.23   | 7.50 | 7.94 | 7.70 | 7.27  | 7.32  | 7.55  | 7.43 | 7.70     | 7.59   |
| Pyridine       | 2 <sup>1</sup> B <sub>2</sub> | 7.10   | 7.38 | 7.81 | 7.59 | 7.13  | 7.30  | 7.56  | 7.27 | 7.59     | 7.46   |
| Pyridine       | 4 <sup>1</sup> A <sub>1</sub> | 8.03   | 8.11 | 9.45 | 6.68 |       |       |       |      | 7.99     | 8.73   |
| Pyridine       | 3 <sup>1</sup> B <sub>2</sub> | 8.53   | 8.58 | 9.64 | 8.77 |       |       |       |      | 8.84     | 8.99   |
| Pyridine       | 1 <sup>1</sup> B <sub>1</sub> | 5.26   | 5.28 | 5.25 | 5.05 | 4.38  | 4.80  | 5.30  | 4.75 | 5.10     | 5.05   |
| Pyridine       | 1 <sup>1</sup> A <sub>2</sub> | 5.46   | 5.50 | 5.73 | 5.50 | 4.48  | 5.11  | 6.03  | 5.41 | 5.37     | 5.80   |
| Pyridine       | 1 <sup>3</sup> A <sub>1</sub> | 4.47   | 4.48 | 4.07 | 4.25 | 4.05  | 3.89  | 3.14  | 4.25 | 4.45     | 3.98   |
| Pyridine       | 1 <sup>3</sup> B <sub>2</sub> | 4.94   | 4.97 | 4.91 | 4.86 | 4.42  | 4.51  | 4.57  | 4.60 | 5.06     | 4.55   |
| Pyridine       | 2 <sup>3</sup> A <sub>1</sub> |        |      | 5.13 | 5.05 | 4.78  | 4.84  | 4.89  | 4.84 | 5.30     | 4.74   |

Table S24: . . . continued

| TZVP Basis Set |                                | NEVPT2 |      | CC   |      | TDDFT |       | DFT/  |      | ADC      |        |
|----------------|--------------------------------|--------|------|------|------|-------|-------|-------|------|----------|--------|
| Molecule       | State                          | PC     | SC   | CCSD | CC3  | BP86  | B3LYP | BHLYP | MRCI | ADC(2)-s | ADC(3) |
| Pyridine       | 2 <sup>3</sup> B <sub>2</sub>  |        |      | 6.41 | 6.40 | 5.46  | 5.64  | 5.84  | 5.97 | 6.47     | 6.08   |
| Pyridine       | 3 <sup>3</sup> A <sub>1</sub>  |        |      | 7.90 | 7.66 | 7.29  | 7.44  | 7.51  | 7.21 | 7.86     | 7.23   |
| Pyridine       | 3 <sup>3</sup> B <sub>2</sub>  |        |      | 8.12 | 7.83 | 7.54  | 7.75  | 7.93  | 7.52 | 8.14     | 7.40   |
| Pyridine       | 1 <sup>3</sup> B <sub>1</sub>  |        |      | 4.61 | 4.50 | 3.71  | 4.04  | 4.39  | 4.31 | 4.52     | 4.43   |
| Pyridine       | 1 <sup>3</sup> A <sub>2</sub>  |        |      | 5.67 | 5.46 | 4.34  | 4.98  | 5.85  | 5.33 | 5.34     | 5.72   |
| Pyrazine       | 1 <sup>1</sup> B <sub>2u</sub> | 5.31   | 5.34 | 5.14 | 5.02 | 5.25  | 5.37  | 5.52  | 4.94 | 5.16     | 4.88   |
| Pyrazine       | 1 <sup>1</sup> B <sub>1u</sub> | 6.76   | 6.85 | 7.18 | 7.07 | 6.41  | 6.50  | 6.55  | 6.71 | 7.06     | 6.85   |
| Pyrazine       | 2 <sup>1</sup> B <sub>1u</sub> | 7.72   | 8.01 | 8.34 | 8.06 | 7.53  | 7.68  | 7.89  | 7.82 | 8.11     | 7.95   |
| Pyrazine       | 2 <sup>1</sup> B <sub>2u</sub> | 7.43   | 7.69 | 8.29 | 8.05 | 7.75  | 7.78  | 8.13  | 7.75 | 8.06     | 8.02   |
| Pyrazine       | 1 <sup>1</sup> B <sub>3g</sub> | 8.73   | 8.76 | 9.75 | 8.77 |       |       |       |      | 9.39     | 8.75   |
| Pyrazine       | 2 <sup>1</sup> A <sub>g</sub>  | 8.87   | 8.92 | 9.55 | 8.69 |       |       |       |      | 8.11     | 7.52   |
| Pyrazine       | 1 <sup>1</sup> B <sub>3u</sub> | 4.20   | 4.25 | 4.42 | 4.24 | 3.59  | 3.96  | 4.40  | 4.00 | 4.29     | 4.21   |
| Pyrazine       | 1 <sup>1</sup> A <sub>u</sub>  | 4.93   | 4.99 | 5.29 | 5.05 | 4.06  | 4.69  | 5.59  | 5.02 | 4.97     | 5.28   |
| Pyrazine       | 1 <sup>1</sup> B <sub>2g</sub> | 5.86   | 5.91 | 6.02 | 5.74 | 5.11  | 5.55  | 6.02  | 5.26 | 5.93     | 5.65   |
| Pyrazine       | 1 <sup>1</sup> B <sub>1g</sub> | 6.77   | 6.83 | 7.13 | 6.75 | 5.57  | 6.38  | 7.66  | 6.46 | 6.70     | 7.18   |
| Pyrimidine     | 1 <sup>1</sup> B <sub>2</sub>  | 5.61   | 5.63 | 5.49 | 5.36 | 5.59  | 5.74  | 5.98  | 5.35 | 5.49     | 5.30   |
| Pyrimidine     | 2 <sup>1</sup> A <sub>1</sub>  | 7.42   | 7.51 | 7.17 | 7.06 | 6.46  | 6.58  | 6.67  | 6.69 | 7.03     | 6.66   |
| Pyrimidine     | 3 <sup>1</sup> A <sub>1</sub>  | 7.73   | 8.00 | 7.97 | 7.74 | 7.32  | 7.48  | 7.73  | 7.46 | 7.70     | 7.53   |
| Pyrimidine     | 2 <sup>1</sup> B <sub>2</sub>  | 7.51   | 7.80 | 8.24 | 8.01 | 7.57  | 7.76  | 7.96  | 7.74 | 7.89     | 7.90   |
| Pyrimidine     | 1 <sup>1</sup> B <sub>1</sub>  | 4.52   | 4.57 | 4.70 | 4.50 | 3.80  | 4.27  | 4.87  | 4.36 | 4.45     | 4.57   |
| Pyrimidine     | 1 <sup>1</sup> A <sub>2</sub>  | 4.81   | 4.87 | 5.12 | 4.93 | 4.02  | 4.60  | 5.39  | 4.82 | 4.80     | 5.10   |
| Pyridazine     | 2 <sup>1</sup> A <sub>1</sub>  | 5.46   | 5.48 | 5.35 | 5.22 | 5.46  | 5.61  | 5.83  | 5.16 | 5.37     | 5.10   |
| Pyridazine     | 1 <sup>1</sup> B <sub>2</sub>  | 7.34   | 7.47 | 7.09 | 6.93 | 6.32  | 6.43  | 6.48  | 6.51 | 6.97     | 6.73   |
| Pyridazine     | 2 <sup>1</sup> B <sub>2</sub>  | 7.25   | 7.50 | 7.79 | 7.55 | 7.10  | 7.24  | 7.45  | 7.25 | 7.58     | 7.43   |

Table S24: . . . continued

| TZVP Basis Set |                                | NEVPT2 |      | CC    |      | TDDFT |       | DFT/  |      | ADC      |        |
|----------------|--------------------------------|--------|------|-------|------|-------|-------|-------|------|----------|--------|
| Molecule       | State                          | PC     | SC   | CCSD  | CC3  | BP86  | B3LYP | BHLYP | MRCI | ADC(2)-s | ADC(3) |
| Pyridazine     | 3 <sup>1</sup> A <sub>1</sub>  | 7.38   | 7.70 | 8.11  | 7.82 | 7.39  | 7.50  | 7.76  | 7.53 | 7.89     | 7.64   |
| Pyridazine     | 1 <sup>1</sup> B <sub>1</sub>  | 3.92   | 3.96 | 4.11  | 3.92 | 3.15  | 3.58  | 4.10  | 5.29 | 3.91     | 3.92   |
| Pyridazine     | 1 <sup>1</sup> A <sub>2</sub>  | 4.57   | 4.61 | 4.76  | 4.49 | 3.54  | 4.18  | 5.03  | 4.25 | 4.41     | 4.68   |
| Pyridazine     | 2 <sup>1</sup> A <sub>2</sub>  | 5.89   | 5.95 | 6.00  | 5.74 | 5.01  | 5.44  | 6.05  | 5.29 | 5.83     | 5.70   |
| Pyridazine     | 2 <sup>1</sup> B <sub>1</sub>  | 6.68   | 6.74 | 6.70  | 6.41 | 5.45  | 6.09  | 6.99  | 6.15 | 6.40     | 6.64   |
| Triazine       | 2 <sup>1</sup> A'              | 5.92   | 5.94 | 5.84  | 5.71 | 5.95  | 6.14  | 6.45  | 5.70 | 5.76     | 5.71   |
| Triazine       | 3 <sup>1</sup> A'              | 7.21   | 7.36 | 7.51  | 7.41 | 6.87  | 7.01  | 7.12  | 7.02 | 7.34     | 6.86   |
| Triazine       | 4 <sup>1</sup> A'              | 7.94   | 8.25 | 8.28  | 8.04 | 7.63  | 7.79  | 8.06  | 7.81 | 7.92     | 8.05   |
| Triazine       | 5 <sup>1</sup> A'              | 9.01   | 9.08 | 10.24 | 9.44 |       |       |       |      | 8.64     | 9.31   |
| Triazine       | 1 <sup>1</sup> A''             | 4.65   | 4.77 | 4.96  | 4.78 | 3.84  | 4.45  | 5.31  | 4.69 | 4.62     | 5.03   |
| Triazine       | 2 <sup>1</sup> A''             | 4.88   | 4.94 | 4.98  | 4.76 | 4.08  | 4.45  | 5.16  | 4.56 | 4.73     | 4.79   |
| Triazine       | 3 <sup>1</sup> A''             | 4.87   | 4.94 | 5.01  | 4.81 | 3.99  | 4.54  | 5.27  | 4.77 | 4.70     | 4.95   |
| Triazine       | 4 <sup>1</sup> A''             | 4.87   | 4.94 | 5.01  | 4.81 | 3.99  | 4.54  | 5.27  | 4.77 | 4.70     | 4.95   |
| Tetrazine      | 1 <sup>1</sup> B <sub>2u</sub> | 5.47   | 5.50 | 5.27  | 5.12 | 5.46  | 5.58  | 5.74  | 5.07 | 5.20     | 4.98   |
| Tetrazine      | 1 <sup>1</sup> B <sub>1u</sub> | 6.67   | 6.93 | 7.66  | 7.45 | 6.82  | 6.90  | 6.88  | 7.08 | 7.54     | 7.18   |
| Tetrazine      | 2 <sup>1</sup> B <sub>1u</sub> | 6.87   | 7.24 | 8.06  | 7.79 | 7.36  | 7.48  | 7.70  | 7.53 | 7.76     | 7.66   |
| Tetrazine      | 2 <sup>1</sup> B <sub>2u</sub> | 8.33   | 8.40 | 8.88  | 8.51 | 8.09  | 8.26  | 8.57  | 8.26 | 8.59     | 7.77   |
| Tetrazine      | 2 <sup>1</sup> B <sub>3g</sub> | 8.10   | 8.24 | 9.44  | 8.47 | 8.72  | 9.30  | 9.96  | 7.44 | 8.85     | 8.25   |
| Tetrazine      | 1 <sup>1</sup> B <sub>3u</sub> | 2.41   | 2.47 | 2.71  | 2.53 | 1.85  | 2.24  | 2.72  | 2.35 | 2.52     | 2.48   |
| Tetrazine      | 1 <sup>1</sup> A <sub>u</sub>  | 3.76   | 3.82 | 4.07  | 3.79 | 2.86  | 3.51  | 4.40  | 3.70 | 3.72     | 3.96   |
| Tetrazine      | 1 <sup>1</sup> B <sub>1g</sub> | 5.17   | 5.22 | 5.32  | 4.97 | 4.13  | 4.73  | 5.33  | 4.45 | 5.13     | 5.00   |
| Tetrazine      | 1 <sup>1</sup> B <sub>2g</sub> | 5.53   | 5.57 | 5.70  | 5.34 | 4.79  | 5.29  | 5.80  | 4.75 | 5.57     | 4.95   |
| Tetrazine      | 1 <sup>1</sup> B <sub>3g</sub> | 6.30   | 6.35 |       |      |       |       |       |      | 7.84     | 6.48   |
| Tetrazine      | 2 <sup>1</sup> A <sub>u</sub>  | 5.70   | 5.77 | 5.70  | 5.46 | 4.60  | 5.04  | 5.60  | 5.05 | 5.54     | 5.39   |

Table S24: . . . continued

| TZVP Basis Set |                                | NEVPT2 |      | CC    |       | TDDFT |       | DFT/  |      | ADC      |        |
|----------------|--------------------------------|--------|------|-------|-------|-------|-------|-------|------|----------|--------|
| Molecule       | State                          | PC     | SC   | CCSD  | CC3   | BP86  | B3LYP | BHLYP | MRCI | ADC(2)-s | ADC(3) |
| Tetrazine      | 2 <sup>1</sup> B <sub>2g</sub> | 6.28   | 6.35 | 6.76  | 6.23  | 5.24  | 5.99  | 7.27  | 5.68 | 6.34     | 6.56   |
| Tetrazine      | 2 <sup>1</sup> B <sub>1g</sub> | 6.83   | 6.89 | 7.25  | 6.87  | 5.87  | 6.64  | 7.73  | 6.00 | 6.93     | 6.57   |
| Tetrazine      | 2 <sup>1</sup> B <sub>3u</sub> | 7.11   | 7.18 | 6.99  | 6.67  | 5.64  | 6.29  | 7.22  | 6.41 | 6.73     | 6.82   |
| Tetrazine      | 3 <sup>1</sup> B <sub>1g</sub> | 7.02   | 7.09 | 8.36  | 7.08  | 6.53  | 7.40  | 9.20  | 6.49 | 7.71     | 7.13   |
| Tetrazine      | 1 <sup>3</sup> B <sub>3u</sub> | 1.64   | 1.69 | 1.99  | 1.89  | 1.11  | 1.42  | 1.69  | 1.88 | 1.89     | 1.75   |
| Tetrazine      | 1 <sup>3</sup> A <sub>u</sub>  | 3.42   | 3.46 | 3.74  | 3.52  | 2.52  | 3.10  | 3.76  | 3.50 | 3.47     | 3.58   |
| Tetrazine      | 1 <sup>3</sup> B <sub>1g</sub> | 4.33   | 4.37 | 4.31  | 4.21  | 3.32  | 3.63  | 3.90  | 3.92 | 4.29     | 4.03   |
| Tetrazine      | 1 <sup>3</sup> B <sub>1u</sub> | 4.55   | 4.56 | 4.05  | 4.33  | 4.24  | 3.83  | 2.51  | 4.27 | 4.60     | 3.93   |
| Tetrazine      | 1 <sup>3</sup> B <sub>2u</sub> | 4.72   | 4.76 | 4.57  | 4.54  | 4.11  | 4.06  | 3.91  | 4.21 | 4.79     | 4.05   |
| Tetrazine      | 1 <sup>3</sup> B <sub>2g</sub> | 5.19   | 5.22 | 5.09  | 4.93  | 4.17  | 4.48  | 4.76  | 4.64 | 5.04     | 4.70   |
| Tetrazine      | 2 <sup>3</sup> A <sub>u</sub>  | 5.03   | 5.11 | 5.20  | 5.03  | 4.00  | 4.43  | 4.99  | 4.84 | 5.08     | 4.98   |
| Tetrazine      | 1 <sup>3</sup> B <sub>3g</sub> | 7.81   | 5.64 |       |       |       |       |       |      |          |        |
| Tetrazine      | 2 <sup>3</sup> B <sub>1u</sub> | 5.51   | 5.54 | 5.48  | 5.38  | 5.12  | 5.24  | 5.36  | 5.26 | 5.64     | 5.00   |
| Tetrazine      | 2 <sup>3</sup> B <sub>2g</sub> | 6.11   | 6.18 | 6.51  | 6.04  | 4.77  | 5.62  | 6.91  | 5.78 | 6.09     | 6.12   |
| Tetrazine      | 2 <sup>3</sup> B <sub>1g</sub> | 6.55   | 6.62 | 7.11  | 6.60  | 5.61  | 6.33  | 7.53  | 6.27 | 6.75     | 6.43   |
| Tetrazine      | 2 <sup>3</sup> B <sub>3u</sub> | 6.72   | 6.78 | 6.80  | 6.53  | 5.36  | 5.97  | 6.83  | 6.36 | 6.54     | 6.64   |
| Tetrazine      | 2 <sup>3</sup> B <sub>2u</sub> | 6.40   | 6.54 | 7.46  | 7.36  | 6.42  | 6.63  | 6.94  | 6.94 | 7.59     | 6.07   |
| Formaldehyde   | 1 <sup>1</sup> A <sub>2</sub>  | 4.22   | 4.22 | 3.97  | 3.95  | 3.80  | 3.89  | 4.00  | 3.71 | 3.91     | 3.82   |
| Formaldehyde   | 1 <sup>1</sup> B <sub>1</sub>  | 9.40   | 9.40 | 9.26  | 9.18  | 8.80  | 8.89  | 9.09  | 8.76 | 7.67     | 8.96   |
| Formaldehyde   | 2 <sup>1</sup> A <sub>1</sub>  | 8.79   | 9.08 | 10.54 | 10.45 | 9.95  | 9.17  | 9.32  | 9.19 | 9.37     | 9.09   |
| Formaldehyde   | 1 <sup>3</sup> A <sub>2</sub>  | 3.75   | 3.75 | 3.52  | 3.55  | 3.05  | 3.13  | 3.21  | 3.32 | 3.41     | 3.43   |
| Formaldehyde   | 1 <sup>3</sup> A <sub>1</sub>  | 6.06   | 6.05 | 5.78  | 5.89  | 5.48  | 5.18  | 4.38  | 5.46 | 5.96     | 5.46   |
| Acetone        | 1 <sup>1</sup> A <sub>2</sub>  | 4.47   | 4.49 | 4.43  | 4.40  | 4.21  | 4.34  | 4.55  | 4.23 | 4.30     | 4.38   |
| Acetone        | 1 <sup>1</sup> B <sub>1</sub>  | 9.50   | 9.59 | 9.26  | 9.17  | 8.15  | 8.60  | 9.06  | 8.56 | 9.12     | 9.14   |

Table S24: . . . continued

| TZVP Basis Set |                                | NEVPT2 |       | CC    |       | TDDFT |       | DFT/  |       | ADC      |        |
|----------------|--------------------------------|--------|-------|-------|-------|-------|-------|-------|-------|----------|--------|
| Molecule       | State                          | PC     | SC    | CCSD  | CC3   | BP86  | B3LYP | BHLYP | MRCI  | ADC(2)-s | ADC(3) |
| Acetone        | 2 <sup>1</sup> A <sub>1</sub>  | 9.28   | 9.58  | 9.87  | 9.65  | 8.76  | 9.04  | 8.97  | 8.53  | 9.44     | 9.96   |
| Acetone        | 1 <sup>3</sup> A <sub>2</sub>  | 4.10   | 4.13  | 4.03  | 4.05  | 3.56  | 3.69  | 3.84  | 3.85  | 3.88     | 4.00   |
| Acetone        | 1 <sup>3</sup> A <sub>1</sub>  | 6.06   | 6.04  | 5.94  | 6.03  | 5.57  | 5.39  | 4.81  | 5.64  | 6.12     | 5.71   |
| Benzoquinone   | 1 <sup>1</sup> B <sub>1g</sub> | 3.00   | 3.06  | 3.19  | 2.85  | 1.89  | 2.43  | 3.04  | 2.22  | 2.67     | 2.83   |
| Benzoquinone   | 1 <sup>1</sup> A <sub>u</sub>  | 2.99   | 3.04  | 3.07  | 2.75  | 2.02  | 2.58  | 2.55  | 2.29  | 2.76     | 2.98   |
| Benzoquinone   | 1 <sup>1</sup> B <sub>3g</sub> | 4.35   | 4.43  | 4.93  | 4.59  | 3.36  | 3.73  | 4.25  | 3.99  | 4.80     | 4.29   |
| Benzoquinone   | 1 <sup>1</sup> B <sub>1u</sub> | 4.85   | 5.02  | 5.89  | 5.62  | 4.49  | 4.83  | 5.31  | 5.07  | 5.42     | 5.43   |
| Benzoquinone   | 1 <sup>1</sup> B <sub>3u</sub> | 5.88   | 5.96  | 6.55  | 5.82  | 4.39  | 5.43  | 6.80  | 5.81  | 5.62     | 5.33   |
| Benzoquinone   | 2 <sup>1</sup> B <sub>3g</sub> | 6.70   | 6.82  | 7.62  | 7.27  | 6.12  | 6.59  | 7.32  | 6.71  | 7.25     | 6.94   |
| Benzoquinone   | 2 <sup>1</sup> B <sub>1u</sub> | 7.72   | 7.78  | 8.47  | 7.82  | 6.82  | 7.25  | 7.73  | 7.60  |          |        |
| Benzoquinone   | 1 <sup>3</sup> B <sub>1g</sub> | 2.82   | 2.88  | 2.71  | 2.51  | 1.44  | 1.92  | 2.42  | 2.21  | 2.35     | 2.57   |
| Benzoquinone   | 1 <sup>3</sup> A <sub>u</sub>  | 2.82   | 2.89  | 2.83  | 2.62  | 1.56  | 2.05  | 3.20  | 2.31  | 2.44     | 2.72   |
| Benzoquinone   | 1 <sup>3</sup> B <sub>1u</sub> |        |       | 2.89  | 2.96  | 2.42  | 2.19  | 1.21  | 2.62  | 3.07     | 2.63   |
| Benzoquinone   | 1 <sup>3</sup> B <sub>3g</sub> |        |       | 3.42  | 3.41  | 2.59  | 2.68  | 2.44  | 3.09  | 3.52     | 3.06   |
| Formamide      | 1 <sup>1</sup> A''             | 5.93   | 5.93  | 5.66  | 5.65  | 5.46  | 5.55  | 5.77  | 5.47  | 5.46     | 5.69   |
| Formamide      | 2 <sup>1</sup> A'              | 7.58   | 7.81  | 8.52  | 8.27  | 7.90  | 8.13  | 8.84  | 8.14  | 7.82     | 7.48   |
| Formamide      | 3 <sup>1</sup> A'              | 10.75  | 10.97 | 11.34 | 10.93 | 10.98 | 10.92 | 11.38 | 10.57 | 7.98     | 8.83   |
| Formamide      | 1 <sup>3</sup> A''             | 5.64   | 5.65  | 5.32  | 5.36  | 4.87  | 4.97  | 5.14  | 5.12  | 5.13     | 5.36   |
| Formamide      | 1 <sup>3</sup> A'              |        |       | 5.67  | 5.74  | 5.20  | 5.13  | 4.93  | 5.42  | 5.81     | 5.51   |
| Acetamide      | 1 <sup>1</sup> A''             | 5.97   | 5.96  | 5.71  | 5.69  | 5.41  | 5.56  | 5.86  | 5.48  | 5.48     | 5.78   |
| Acetamide      | 2 <sup>1</sup> A'              | 7.48   | 7.69  | 7.85  | 7.67  | 7.50  | 7.46  | 8.14  | 7.51  | 7.47     | 7.59   |
| Acetamide      | 3 <sup>1</sup> A'              | 10.28  | 10.50 | 10.77 | 10.50 | 9.42  | 10.01 | 10.59 | 9.98  | 8.33     | 6.09   |
| Acetamide      | 1 <sup>3</sup> A''             |        |       | 5.39  | 5.42  | 4.85  | 5.01  | 5.25  | 5.13  | 5.16     | 5.46   |
| Acetamide      | 1 <sup>3</sup> A'              |        |       | 5.83  | 5.88  | 5.26  | 5.26  | 5.14  | 5.52  | 5.92     | 5.70   |

Table S24: . . . continued

| TZVP Basis Set |                    | NEVPT2 |       | CC    |       | TDDFT |       | DFT/  |      | ADC      |        |
|----------------|--------------------|--------|-------|-------|-------|-------|-------|-------|------|----------|--------|
| Molecule       | State              | PC     | SC    | CCSD  | CC3   | BP86  | B3LYP | BHLYP | MRCI | ADC(2)-s | ADC(3) |
| Propanamide    | 1 <sup>1</sup> A'' | 5.99   | 5.99  | 5.74  | 5.72  | 5.43  | 5.59  | 5.89  | 5.47 | 5.49     | 5.81   |
| Propanamide    | 2 <sup>1</sup> A'  | 7.40   | 7.61  | 7.80  | 7.62  | 7.28  | 7.76  | 8.09  | 7.46 | 7.39     | 7.58   |
| Propanamide    | 3 <sup>1</sup> A'  | 10.16  | 10.37 | 10.34 | 10.06 | 8.17  | 9.00  | 10.07 | 9.51 | 7.94     | 8.08   |
| Propanamide    | 1 <sup>3</sup> A'' |        |       | 5.41  | 5.45  | 4.89  | 5.04  | 5.29  | 5.13 | 5.18     | 5.49   |
| Propanamide    | 1 <sup>3</sup> A'  |        |       | 5.84  | 5.90  | 5.27  | 5.28  | 5.18  | 5.51 | 5.92     | 5.73   |
| Cytosine       | 2 <sup>1</sup> A'  | 4.70   | 4.78  | 4.98  | 4.72  | 4.20  | 4.64  | 5.19  | 4.62 | 4.60     | 5.83   |
| Cytosine       | 1 <sup>1</sup> A'' | 5.50   | 5.56  | 5.45  | 5.16  | 3.79  | 4.76  | 6.21  | 4.86 | 4.81     | 5.42   |
| Cytosine       | 3 <sup>1</sup> A'  | 5.65   | 5.74  | 5.95  | 5.61  | 4.92  | 5.42  | 6.16  | 5.43 | 5.56     | 5.76   |
| Cytosine       | 4 <sup>1</sup> A'  | 6.47   | 6.70  | 6.81  | 6.61  | 6.49  | 6.72  | 6.99  | 6.38 | 6.43     | 6.64   |
| Cytosine       | 2 <sup>1</sup> A'' | 5.73   | 5.80  | 5.99  | 5.52  | 4.49  | 5.11  | 5.64  | 5.32 | 5.24     | 6.16   |
| Cytosine       | 5 <sup>1</sup> A'  | 6.83   | 6.98  | 7.23  |       | 6.37  | 6.46  | 7.44  | 6.74 |          |        |
| Cytosine       | 6 <sup>1</sup> A'  | 8.06   | 8.21  | 8.69  |       |       |       |       |      |          |        |
| Thymine        | 1 <sup>1</sup> A'' | 4.96   | 5.04  | 5.14  | 4.94  | 4.09  | 4.70  | 5.30  | 4.48 | 4.67     | 5.22   |
| Thymine        | 2 <sup>1</sup> A'  | 5.05   | 5.18  | 5.60  | 5.34  | 4.60  | 5.00  | 5.48  | 5.18 | 5.30     | 5.35   |
| Thymine        | 3 <sup>1</sup> A'  | 6.32   | 6.43  | 6.78  | 6.34  | 5.33  | 5.97  | 6.94  | 5.98 | 6.29     | 6.57   |
| Thymine        | 2 <sup>1</sup> A'' | 6.49   | 6.57  | 6.57  | 6.59  | 4.79  | 5.80  | 6.77  | 5.93 | 6.09     | 6.52   |
| Thymine        | 4 <sup>1</sup> A'  | 6.44   | 6.64  | 7.05  | 6.71  | 5.85  | 6.31  | 7.03  | 6.42 | 6.72     | 6.80   |
| Thymine        | 3 <sup>1</sup> A'' | 6.69   | 6.89  | 7.67  | 5.33  | 5.33  | 6.21  | 7.70  | 6.43 | 6.58     | 6.76   |
| Thymine        | 5 <sup>1</sup> A'  | 7.41   | 7.56  | 7.90  | 6.93  | 6.93  | 7.47  | 8.17  | 7.36 |          |        |
| Uracil         | 1 <sup>1</sup> A'' | 4.92   | 4.99  | 5.11  | 4.90  | 3.97  | 4.63  | 5.27  | 4.41 | 4.64     | 5.19   |
| Uracil         | 2 <sup>1</sup> A'  | 5.27   | 5.39  | 5.70  | 5.44  | 4.77  | 5.19  | 5.67  | 5.33 | 5.41     | 5.44   |
| Uracil         | 3 <sup>1</sup> A'  | 6.22   | 6.33  | 6.76  | 6.29  | 5.21  | 5.87  | 6.90  | 5.92 | 6.26     | 6.53   |
| Uracil         | 2 <sup>1</sup> A'' | 6.42   | 6.49  | 7.68  | 6.32  | 4.76  | 5.74  | 6.61  | 5.84 | 6.01     | 6.68   |
| Uracil         | 3 <sup>1</sup> A'' | 6.70   | 6.89  | 6.50  | 6.84  | 5.23  | 6.14  | 7.72  | 6.43 | 6.59     | 6.71   |

Table S24: . . . continued

| TZVP Basis Set | Molecule | State              | NEVPT2 |      | CC   |      | TDDFT |       | DFT/  |      | ADC  |          |
|----------------|----------|--------------------|--------|------|------|------|-------|-------|-------|------|------|----------|
|                |          |                    | PC     | SC   | CCSD | CC3  | BP86  | B3LYP | BHLYP | MRCI |      | ADC(2)-s |
| Uracyl         |          | 4 <sup>1</sup> A'  | 6.68   | 6.86 | 7.19 | 6.84 | 6.01  | 6.50  | 7.21  | 6.56 | 6.89 | 6.94     |
| Uracyl         |          | 4 <sup>1</sup> A'' | 7.27   | 7.42 | 7.74 | 7.12 | 6.11  | 6.64  | 7.91  | 6.79 | 6.95 | 7.85     |
| Uracyl         |          | 5 <sup>1</sup> A'  | 7.38   | 7.64 | 7.81 |      | 7.06  | 7.45  | 8.09  | 7.31 | 7.40 | 7.76     |
| Adenine        |          | 2 <sup>1</sup> A'  | 5.07   | 5.22 | 5.37 | 5.18 | 4.99  | 5.27  | 5.67  | 4.99 | 5.20 | 5.19     |
| Adenine        |          | 3 <sup>1</sup> A'  | 5.43   | 5.46 | 5.61 | 5.39 | 4.57  | 5.00  | 5.48  | 5.15 | 5.33 | 5.30     |
| Adenine        |          | 1 <sup>1</sup> A'' | 5.36   | 5.43 | 5.58 | 5.34 | 4.30  | 4.97  | 5.81  | 5.11 | 5.19 | 5.56     |
| Adenine        |          | 4 <sup>1</sup> A'  | 6.45   | 6.68 | 6.83 | 6.53 | 5.84  | 6.32  | 6.87  | 6.29 | 6.49 | 6.56     |
| Adenine        |          | 5 <sup>1</sup> A'  | 6.82   | 6.95 | 7.17 |      | 6.27  | 6.69  | 7.30  | 6.19 | 6.81 | 6.60     |
| Adenine        |          | 2 <sup>1</sup> A'' | 6.07   | 6.16 | 6.19 | 5.96 | 5.05  | 5.61  | 6.34  | 5.72 | 5.84 | 6.13     |
| Adenine        |          | 6 <sup>1</sup> A'  | 6.95   | 7.01 | 7.72 |      | 6.65  | 7.08  | 7.71  | 7.10 |      |          |
| Adenine        |          | 7 <sup>1</sup> A'  | 7.72   | 7.83 | 8.47 |      | 6.91  | 7.52  | 8.22  | 6.62 |      |          |

Table S25: Mean signed error (MSEE) and mean unsigned error (MUEE) in eV for vertical excitation energies  $V_i^{\text{calc}}$  computed at different levels of theory using the TZVP basis set compared to experimental excitation energies  $V_i^{\text{exp}}$  of the organic molecules from Thiel’s benchmark set.

| Method                          | MSEE <sup>a</sup> | MUEE <sup>b</sup> | Ref.      |
|---------------------------------|-------------------|-------------------|-----------|
| CASPT2 ( $\varepsilon = 0$ )    | -0.13             | 0.33              | this work |
| CASPT2 ( $\varepsilon = 0.25$ ) | 0.29              | 0.33              | this work |
| PC-NEVPT2 <sup>c</sup>          | 0.37              | 0.43              | 56        |
| SC-NEVPT2 <sup>c</sup>          | 0.46              | 0.49              | 56        |
| CCSD                            | 0.64              | 0.65              | 51        |
| CC3                             | 0.44              | 0.44              | 51        |
| ADC(2)-s                        | 0.36              | 0.45              | 58        |
| ADC(3)                          | 0.25              | 0.39              | 58        |
| TDDFT (BP86)                    | -0.17             | 0.41              | 57        |
| TDDFT (B3LYP)                   | 0.10              | 0.36              | 57        |
| TDDFT (BHLYP)                   | 0.42              | 0.69              | 57        |
| DFT/MRCI (BHLYP)                | 0.13              | 0.28              | 57        |

<sup>a</sup>mean signed error of excitation energies computed as  $\text{MSEE} = \sum_{i=1}^{N_{\text{States}}} (V_i^{\text{calc}} - V_i^{\text{exp}}) / N_{\text{States}}$   
<sup>b</sup>mean unsigned error of excitation energies computed as  $\text{MUEE} = \sum_{i=1}^{N_{\text{States}}} (|V_i^{\text{calc}} - V_i^{\text{exp}}|) / N_{\text{States}}$   
<sup>c</sup>obtained using the state-specific Fock operator

## References

- (1) Andersson, K.; Malmqvist, P.-Å.; Roos, B. O. J. Chem. Phys. **1992**, 96, 1218–1226.
- (2) Fülcher, M. P.; Andersson, K.; Roos, B. O. J. Phys. Chem. **1992**, 96, 9204–9212.
- (3) Serrano-Andrés, L.; Merchán, M.; Nebot-Gil, I.; Roos, B. O.; Fülcher, M. P. J. Am. Chem. Soc. **1993**, 115, 6184–6197.
- (4) Serrano-Andrés, L.; Lindh, R.; Roos, B. O.; Merchán, M. J. Phys. Chem. **1993**, 97, 9360–9368.
- (5) Rubio, M.; Merchán, M.; Ortí, E.; Roos, B. O. Chem. Phys **1994**, 179, 395–409.
- (6) Fülcher, M. P.; Roos, B. O. Theor. Chim. Acta **1994**, 87, 403–413.

- (7) Roos, B. O.; Merchán, M.; McDiarmid, R.; Xing, X. J. Am. Chem. Soc. **1994**, 116, 5927–5936.
- (8) Lorentzon, J.; Malmqvist, P.-Å.; Fülischer, M. P.; Roos, B. O. Theor. Chim. Acta **1995**, 91, 91–108.
- (9) Borowski, P.; Fülischer, M. P.; Malmqvist, P.-Å.; Roos, B. O. Chem. Phys. Lett. **1995**, 237, 195–203.
- (10) Merchán, M.; Roos, B. O. Theor. Chim. Acta **1995**, 92, 227–239.
- (11) Andersson, K. Theor. Chim. Acta **1995**, 91, 31–46.
- (12) Roos, B. O.; Andersson, K.; Fülischer, M. P.; Serrano-Andrés, L.; Pierloot, K.; Merchán, M.; Molina, V. J. Mol. Struct. Theochem **1996**, 388, 257–276.
- (13) Serrano-Andrés, L.; Fülischer, M. P. J. Am. Chem. Soc. **1996**, 118, 12200–12206.
- (14) Serrano-Andrés, L.; Fülischer, M. P.; Roos, B. O.; Merchán, M. J. Phys. Chem. **1996**, 100, 6484–6491.
- (15) Serrano-Andrés, L.; Roos, B. O. J. Am. Chem. Soc. **1996**, 118, 185–195.
- (16) Beck, M. E.; Rebentisch, R.; Hohlneicher, G.; Fülischer, M. P.; Serrano-Andrés, L.; Roos, B. O. J. Chem. Phys. **1997**, 107, 9464–9474.
- (17) Molina, V.; Merchán, M.; Roos, B. O. J. Phys. Chem. A **1997**, 101, 3478–3487.
- (18) Serrano-Andrés, L.; Fülischer, M. P.; Karlström, G. Int. J. Quant. Chem. **1997**, 65, 167–181.
- (19) Fülischer, M. P.; Serrano-Andrés, L.; Roos, B. O. J. Am. Chem. Soc. **1997**, 119, 6168–6176.
- (20) Malsch, K.; Rebentisch, R.; Swiderek, P.; Hohlneicher, G. Theor. Chem. Acc. **1998**, 100, 171–182.
- (21) Serrano-Andrés, L.; Merchán, M.; Rubio, M.; Roos, B. O. Chem. Phys. Lett. **1995**, 295, 195–203.

- (22) Finley, J. P.; Malmqvist, P.-Å.; Roos, B. O.; Serrano-Andrés, L. Chem. Phys. Lett. **1998**, 288, 299–306.
- (23) Molina, V.; Merchán, M.; Roos, B. O. Spectrochim. Acta, Part A **1999**, 55, 433–446.
- (24) Rubio, M.; Roos, B. O. Mol. Phys. **1999**, 96, 603–615.
- (25) Molina, V.; Smith, B. R.; Merchán, M. Chem. Phys. Lett. **1999**, 309, 486–494.
- (26) González-Luque, R.; Merchán, M.; Roos, B. O. Z. Phys. D **1996**, 36, 311–316.
- (27) Borin, A. C.; Serrano-Andrés, L. J. Mol. Struct. (THEOCHEM) **1999**, 464, 121–128.
- (28) Merchán, M.; Serrano-Andrés, L.; Slater, L. S.; Roos, B. O.; McDiarmid, R.; Xing, X. J. Phys. Chem. A **1999**, 103, 5468–5476.
- (29) Cai, Z.-L.; Reimers, J. R. J. Phys. Chem. A **2000**, 104, 8389–8408.
- (30) Kröhl, O.; Malsch, K.; Swiderek, P. Phys. Chem. Chem. Phys. **2000**, 2, 947–953.
- (31) Borin, A. C.; Serrano-Andrés, L. Chem. Phys. **2000**, 262, 253–265.
- (32) Molina, V.; Merchán, M. J. Phys. Chem. A **2001**, 105, 3745–3751.
- (33) Roos, B. O.; Malmqvist, P.-Å.; Molina, V.; Serrano-Andrés, L.; Merchán, M. J. Chem. Phys. **2002**, 116, 7526–7535.
- (34) Serrano-Andrés, L.; Pou-Amérigo, R.; Fülcher, M. P.; Borin, A. C. J. Chem. Phys. **2002**, 117, 1649–1659.
- (35) Weber, J.; Malsch, K.; Hohlneicher, G. Chem. Phys. **2001**, 264, 275–318.
- (36) Climent, T.; González-Luque, R.; Merchán, M. J. Phys. Chem. A **2003**, 107, 6995–7003.
- (37) Borin, A. C.; Serrano-Andrés, L.; Ludwig, V.; Canuto, S. Phys. Chem. Chem. Phys. **2003**, 5, 5001–5009.
- (38) Aquilante, F.; Barone, V.; Roos, B. O. J. Chem. Phys. **2003**, 119, 12323–12334.

- (39) Murakami, A.; Kobayashi, T.; Goldberg, A.; Nakamura, S. J. Chem. Phys. **2004**, 120, 1245–1252.
- (40) Rubio, M.; Merchán, M.; Pou-Américo, R.; Ortí, E. ChemPhysChem **2003**, 4, 1308–1315.
- (41) Aquilante, F.; Cossi, M.; Crescenzi, O.; Scalmani, G.; Barone, V. Mol. Phys. **2003**, 101, 19465–1953.
- (42) Balková, A.; Kucharski, S. A.; Bartlett, R. J. Chem. Phys. Lett. **1991**, 182, 511–518.
- (43) Koch, H.; Christiansen, O.; Jørgensen, P.; Olsen, J. Chem. Phys. Lett. **1995**, 244, 75–82.
- (44) Christiansen, O.; Koch, H.; Jørgensen, P.; Olsen, J. Chem. Phys. Lett. **1996**, 256, 185–194.
- (45) Larsen, H.; Hald, K.; Olsen, J.; Jørgensen, P. J. Chem. Phys. **2001**, 115, 3015–3020.
- (46) Hald, K.; Jørgensen, P.; Olsen, J.; Jaszuński, M. J. Chem. Phys. **2001**, 115, 671–679.
- (47) Li, X.; Paldus, J. J. Chem. Phys. **2003**, 119, 5346.
- (48) Abrams, M. L.; Sherrill, C. D. J. Chem. Phys. **2004**, 121, 9211–9219.
- (49) Pitarch-Ruiz, J.; Sánchez-Marín, J.; Velasco, A. M. J. Comput. Chem. **2008**, 29, 523–532.
- (50) Huber, K. P.; Herzberg, G. In NIST Chemistry WebBook, NIST Standard Reference Database Number 69; Linstrom, P., Mallard, W., Eds.; National Institute of Standards and Technology, Gaithersburg MD, 20899, <http://webbook.nist.gov>, (retrieved November 19, 2015), 2015; Chapter Constants of Diatomic Molecules.
- (51) Schreiber, M.; Silva-Junior, M. R.; Sauer, S. P. A.; Thiel, W. J. Chem. Phys. **2008**, 128, 134110.
- (52) Schäfer, A.; Huber, C.; Ahlrichs, R. J. Chem. Phys. **1994**, 100, 5829–5853.
- (53) Roos, B. O.; Lindh, R.; Malmqvist, P.-Å.; Veryazov, V.; Widmark, P.-O. J. Phys. Chem. A **2004**, 108, 2851–2858.
- (54) Ghigo, G.; Roos, B. O.; Malmqvist, P.-Å. Chem. Phys. Lett. **2004**, 396, 142–149.

- (55) Andersson, K.; Roos, B. O. Int. J. Quant. Chem. **1993**, 45, 591–607.
- (56) Schapiro, I.; Sivalingam, K.; Neese, F. J. Chem. Theory. Comput. **2013**, 9, 3567–3580.
- (57) Silva-Junior, M. R.; Schreiber, M.; Sauer, S. P. A.; Thiel, W. J. Chem. Phys. **2008**, 129, 104103.
- (58) Harbach, P. H. P.; Wormit, M.; Dreuw, A. J. Chem. Phys. **2014**, 141, 064113.
